# Supplementary material for: Catalytic reductive desymmetrization of malonic esters
Source: Springer Nature journal article supplement (doi:10.1038/s41557-021-00715-0), 2021-06-10
Supplement: 41557_2021_715_MOESM97_ESM.cif [file 41557_2021_715_MOESM97_ESM.cif]

####################################################################### 
# 
# This file contains crystal structure data downloaded from the 
# Cambridge Structural Database (CSD) hosted by the Cambridge 
# Crystallographic Data Centre (CCDC).
# 
# Full information about CCDC data access policies and citation 
# guidelines are available at http://www.ccdc.cam.ac.uk/access/V1 
# 
# Audit and citation data items may have been added by the CCDC. 
# Please retain this information to preserve the provenance of 
# this file and to allow appropriate attribution of the data. 
# 
#######################################################################

data_cu_CHEM0884
_database_code_depnum_ccdc_archive 'CCDC 2025159'
loop_
_audit_author_name
_audit_author_address
'Kam-Hung Low'
;University of Hong Kong
Hong Kong
;
_audit_update_record             
;
2020-08-25 deposited with the CCDC.	2020-11-13 downloaded from the CCDC.
;

_publ_section_references         
;
Sheldrick, G. M. (2015). SHELXT - Integrated 
space-group and crystal-structure determination. 
Acta Cryst. A71, 3-8.
;
_publ_section_acknowledgements   
;
The authors thank The University of Hong Kong's University 
Development Fund and 
the Dr. Hui Wai Haan Fund for funding the Bruker D8 VENTURE 
X-Ray Diffractometer.
;
_publ_section_figure_captions    
;
Fig. 1. ORTEP diagram of the molecule with thermal 
ellipsoids at 50% probability level. Riding hydrogen atoms
 are omitted for clarity.
;
_publ_author.id_iucr             
;
IUCR19384
;

_audit_creation_method           SHELXL-2018/3
_shelx_SHELXL_version_number     2018/3
_chemical_name_systematic        ?
_chemical_name_common            ?
_chemical_melting_point          ?
_chemical_formula_moiety         'C24 H31 Br O4'
_chemical_formula_sum            'C24 H31 Br O4'
_chemical_formula_weight         463.40

loop_
_atom_type_symbol
_atom_type_description
_atom_type_scat_dispersion_real
_atom_type_scat_dispersion_imag
_atom_type_scat_source
C C 0.0181 0.0091 'International Tables Vol C Tables 4.2.6.8 and 6.1.1.4'
H H 0.0000 0.0000 'International Tables Vol C Tables 4.2.6.8 and 6.1.1.4'
Br Br -0.6763 1.2805 'International Tables Vol C Tables 4.2.6.8 and 6.1.1.4'
O O 0.0492 0.0322 'International Tables Vol C Tables 4.2.6.8 and 6.1.1.4'

_space_group_crystal_system      monoclinic
_space_group_IT_number           4
_space_group_name_H-M_alt        'P 21'
_space_group_name_Hall           'P 2yb'

_shelx_space_group_comment       
;
The symmetry employed for this shelxl refinement is uniquely defined
by the following loop, which should always be used as a source of
symmetry information in preference to the above space-group names.
They are only intended as comments.
;

loop_
_space_group_symop_operation_xyz
'x, y, z'
'-x, y+1/2, -z'

_cell_length_a                   12.9729(9)
_cell_length_b                   6.6129(5)
_cell_length_c                   12.9882(8)
_cell_angle_alpha                90
_cell_angle_beta                 102.169(4)
_cell_angle_gamma                90
_cell_volume                     1089.20(13)
_cell_formula_units_Z            2
_cell_measurement_temperature    200(2)
_cell_measurement_reflns_used    2436
_cell_measurement_theta_min      5.42
_cell_measurement_theta_max      66.90

_exptl_crystal_description       plate
_exptl_crystal_colour            colorless
_exptl_crystal_density_meas      ?
_exptl_crystal_density_method    ?
_exptl_crystal_density_diffrn    1.413
_exptl_crystal_F_000             484
_exptl_transmission_factor_min   ?
_exptl_transmission_factor_max   ?
_exptl_crystal_size_max          0.189
_exptl_crystal_size_mid          0.054
_exptl_crystal_size_min          0.015
_exptl_absorpt_coefficient_mu    2.790
_shelx_estimated_absorpt_T_min   0.621
_shelx_estimated_absorpt_T_max   0.959
_exptl_absorpt_correction_type   multi-scan
_exptl_absorpt_correction_T_min  0.5767
_exptl_absorpt_correction_T_max  0.7531
_exptl_absorpt_process_details   
;
 SADABS 2016/2: Krause, L., Herbst-Irmer, R., Sheldrick G.M. & Stalke D.,
 J. Appl. Cryst. 48 (2015) 3-10
;
_exptl_absorpt_special_details   ?
_diffrn_ambient_temperature      200(2)
_diffrn_radiation_wavelength     1.54178
_diffrn_radiation_type           CuK\a
_diffrn_source                   'I\mS HB micro-focus sealed tube'
_diffrn_measurement_device_type  'Bruker D8 VENTURE FIXED-CHI PHOTON 100 CMOS'
_diffrn_measurement_method       '\f and \w scans'
_diffrn_detector_area_resol_mean 10.4167
_diffrn_reflns_number            13925
_diffrn_reflns_av_unetI/netI     0.0935
_diffrn_reflns_av_R_equivalents  0.1054
_diffrn_reflns_limit_h_min       -15
_diffrn_reflns_limit_h_max       15
_diffrn_reflns_limit_k_min       -7
_diffrn_reflns_limit_k_max       7
_diffrn_reflns_limit_l_min       -15
_diffrn_reflns_limit_l_max       15
_diffrn_reflns_theta_min         3.481
_diffrn_reflns_theta_max         68.223
_diffrn_reflns_theta_full        67.679
_diffrn_measured_fraction_theta_max 0.997
_diffrn_measured_fraction_theta_full 0.999
_diffrn_reflns_Laue_measured_fraction_max 0.997
_diffrn_reflns_Laue_measured_fraction_full 0.999
_diffrn_reflns_point_group_measured_fraction_max 0.978
_diffrn_reflns_point_group_measured_fraction_full 0.981
_reflns_number_total             3902
_reflns_number_gt                2660
_reflns_threshold_expression     'I > 2\s(I)'
_reflns_Friedel_coverage         0.794
_reflns_Friedel_fraction_max     0.956
_reflns_Friedel_fraction_full    0.960

_reflns_special_details          
;
 Reflections were merged by SHELXL according to the crystal
 class for the calculation of statistics and refinement.
 
 _reflns_Friedel_fraction is defined as the number of unique
 Friedel pairs measured divided by the number that would be
 possible theoretically, ignoring centric projections and
 systematic absences.
;

_computing_data_collection       'APEX3 v2019.3-2click4 (Bruker Nano, 2019)'
_computing_cell_refinement       'SAINT V8.38A (Bruker AXS Inc., 2017)'
_computing_data_reduction        'SAINT V8.38A (Bruker AXS Inc., 2017)'
_computing_structure_solution    'XT, VERSION 2014/5'
_computing_structure_refinement  'SHELXL-2018/3 (Sheldrick, 2018)'
_computing_molecular_graphics    'shelXle (C.B. Huebschle, rev 924)'
_computing_publication_material  'XP, VERSION 5'
_refine_special_details          ?
_refine_ls_structure_factor_coef Fsqd
_refine_ls_matrix_type           full
_refine_ls_weighting_scheme      calc
_refine_ls_weighting_details     
'w=1/[\s^2^(Fo^2^)+(0.0257P)^2^+1.2322P] where P=(Fo^2^+2Fc^2^)/3'
_atom_sites_solution_primary     dual
_atom_sites_solution_secondary   difmap
_atom_sites_solution_hydrogens   geom
_refine_ls_hydrogen_treatment    constr
_refine_ls_extinction_method     none
_refine_ls_extinction_coef       .
_refine_ls_abs_structure_details 
;
 Flack x determined using 872 quotients [(I+)-(I-)]/[(I+)+(I-)]
 (Parsons, Flack and Wagner, Acta Cryst. B69 (2013) 249-259).
;
_refine_ls_abs_structure_Flack   0.04(2)
_chemical_absolute_configuration ad
_refine_ls_number_reflns         3902
_refine_ls_number_parameters     264
_refine_ls_number_restraints     1
_refine_ls_R_factor_all          0.0972
_refine_ls_R_factor_gt           0.0497
_refine_ls_wR_factor_ref         0.1291
_refine_ls_wR_factor_gt          0.0987
_refine_ls_goodness_of_fit_ref   1.116
_refine_ls_restrained_S_all      1.116
_refine_ls_shift/su_max          0.001
_refine_ls_shift/su_mean         0.000

loop_
_atom_site_label
_atom_site_type_symbol
_atom_site_fract_x
_atom_site_fract_y
_atom_site_fract_z
_atom_site_U_iso_or_equiv
_atom_site_adp_type
_atom_site_occupancy
_atom_site_site_symmetry_order
_atom_site_calc_flag
_atom_site_refinement_flags_posn
_atom_site_refinement_flags_adp
_atom_site_refinement_flags_occupancy
_atom_site_disorder_assembly
_atom_site_disorder_group
Br1 Br 0.90242(8) 0.86942(17) 1.19762(8) 0.0519(3) Uani 1 1 d . . . . .
O1 O 0.8498(5) 0.6052(10) 0.5146(5) 0.0432(15) Uani 1 1 d . . . . .
O2 O 0.7090(6) 0.7735(10) 0.5464(5) 0.0498(17) Uani 1 1 d . . . . .
O3 O 0.7997(5) 0.4100(10) 0.7199(4) 0.0462(18) Uani 1 1 d . . . . .
O4 O 0.8432(5) 0.1303(10) 0.8170(5) 0.0466(16) Uani 1 1 d . . . . .
C1 C 0.9712(8) 0.833(2) 0.6228(8) 0.069(4) Uani 1 1 d . . . . .
H1A H 1.019453 0.719999 0.644983 0.104 Uiso 1 1 calc R U . . .
H1B H 0.924365 0.848943 0.672420 0.104 Uiso 1 1 calc R U . . .
H1C H 1.012023 0.957785 0.621697 0.104 Uiso 1 1 calc R U . . .
C2 C 0.9075(8) 0.7932(14) 0.5161(8) 0.051(3) Uani 1 1 d . . . . .
H2A H 0.857373 0.905787 0.494430 0.061 Uiso 1 1 calc R U . . .
H2AB H 0.954471 0.785176 0.465178 0.061 Uiso 1 1 calc R U . . .
C3 C 0.7510(8) 0.6173(14) 0.5330(7) 0.039(2) Uani 1 1 d . . . . .
C4 C 0.7053(7) 0.4059(15) 0.5395(7) 0.039(2) Uani 1 1 d . . . . .
C5 C 0.7811(8) 0.2881(12) 0.6245(6) 0.040(2) Uani 1 1 d . . . . .
H5A H 0.749923 0.156170 0.637163 0.048 Uiso 1 1 calc R U . . .
H5AB H 0.848349 0.262900 0.602009 0.048 Uiso 1 1 calc R U . . .
C6 C 0.8303(7) 0.3110(13) 0.8117(7) 0.036(2) Uani 1 1 d . . . . .
C7 C 0.8464(7) 0.4506(13) 0.9033(7) 0.035(2) Uani 1 1 d . . . . .
C8 C 0.8972(5) 0.3768(19) 1.0021(5) 0.0345(16) Uani 1 1 d . . . . .
H8 H 0.920373 0.240163 1.008803 0.041 Uiso 1 1 calc R U . . .
C9 C 0.9140(7) 0.4995(14) 1.0894(7) 0.038(2) Uani 1 1 d . . . . .
H9 H 0.949090 0.449547 1.156255 0.046 Uiso 1 1 calc R U . . .
C10 C 0.8785(7) 0.6983(14) 1.0779(7) 0.037(2) Uani 1 1 d . . . . .
C11 C 0.8282(7) 0.7749(15) 0.9813(7) 0.041(2) Uani 1 1 d . . . . .
H11 H 0.803373 0.910425 0.975303 0.050 Uiso 1 1 calc R U . . .
C12 C 0.8144(7) 0.6511(14) 0.8933(7) 0.040(2) Uani 1 1 d . . . . .
H12 H 0.782940 0.703710 0.825989 0.048 Uiso 1 1 calc R U . . .
C13 C 0.6001(7) 0.4238(16) 0.5749(7) 0.046(3) Uani 1 1 d . . . . .
H13A H 0.554130 0.519241 0.528890 0.069 Uiso 1 1 calc R U . . .
H13B H 0.612990 0.472775 0.647675 0.069 Uiso 1 1 calc R U . . .
H13C H 0.566049 0.290966 0.570616 0.069 Uiso 1 1 calc R U . . .
C14 C 0.6989(7) 0.2826(13) 0.4374(6) 0.034(2) Uani 1 1 d . . . . .
H14A H 0.772476 0.260376 0.429925 0.040 Uiso 1 1 calc R U . . .
H14B H 0.670467 0.148178 0.450181 0.040 Uiso 1 1 calc R U . . .
C15 C 0.6369(6) 0.3534(17) 0.3291(5) 0.0288(16) Uani 1 1 d . . . . .
C16 C 0.6412(8) 0.1725(15) 0.2549(7) 0.037(2) Uani 1 1 d . . . . .
H16A H 0.715736 0.139714 0.255181 0.045 Uiso 1 1 calc R U . . .
H16B H 0.608853 0.052688 0.281178 0.045 Uiso 1 1 calc R U . . .
C17 C 0.6866(9) 0.5365(15) 0.2856(8) 0.043(2) Uani 1 1 d . . . . .
H17A H 0.761437 0.507640 0.285623 0.052 Uiso 1 1 calc R U . . .
H17B H 0.683896 0.655453 0.331268 0.052 Uiso 1 1 calc R U . . .
C18 C 0.5207(6) 0.3997(18) 0.3256(6) 0.040(2) Uani 1 1 d . . . . .
H18A H 0.515458 0.516929 0.371643 0.048 Uiso 1 1 calc R U . . .
H18B H 0.487605 0.282008 0.352957 0.048 Uiso 1 1 calc R U . . .
C19 C 0.5826(8) 0.2194(16) 0.1413(7) 0.043(2) Uani 1 1 d . . . . .
H19 H 0.586836 0.100102 0.095041 0.051 Uiso 1 1 calc R U . . .
C20 C 0.6267(8) 0.5841(15) 0.1722(7) 0.044(3) Uani 1 1 d . . . . .
H20 H 0.659585 0.703966 0.144922 0.052 Uiso 1 1 calc R U . . .
C21 C 0.4609(7) 0.4470(13) 0.2123(7) 0.039(2) Uani 1 1 d . . . . .
H21 H 0.385292 0.476468 0.212264 0.046 Uiso 1 1 calc R U . . .
C22 C 0.6339(7) 0.400(2) 0.1018(7) 0.050(3) Uani 1 1 d . . . . .
H22A H 0.598029 0.430521 0.028354 0.060 Uiso 1 1 calc R U . . .
H22B H 0.708755 0.369552 0.102623 0.060 Uiso 1 1 calc R U . . .
C23 C 0.5112(8) 0.6301(15) 0.1721(7) 0.047(2) Uani 1 1 d . . . . .
H23A H 0.506644 0.748196 0.217733 0.057 Uiso 1 1 calc R U . . .
H23B H 0.473084 0.663225 0.099710 0.057 Uiso 1 1 calc R U . . .
C24 C 0.4680(7) 0.2648(14) 0.1418(7) 0.042(2) Uani 1 1 d . . . . .
H24A H 0.435215 0.145596 0.168103 0.050 Uiso 1 1 calc R U . . .
H24B H 0.429083 0.293601 0.069195 0.050 Uiso 1 1 calc R U . . .

loop_
_atom_site_aniso_label
_atom_site_aniso_U_11
_atom_site_aniso_U_22
_atom_site_aniso_U_33
_atom_site_aniso_U_23
_atom_site_aniso_U_13
_atom_site_aniso_U_12
Br1 0.0581(6) 0.0563(6) 0.0425(5) -0.0133(6) 0.0131(4) -0.0048(7)
O1 0.043(4) 0.042(4) 0.045(4) -0.002(3) 0.009(3) -0.004(3)
O2 0.069(5) 0.030(4) 0.051(4) -0.004(3) 0.014(4) 0.007(3)
O3 0.075(4) 0.031(5) 0.028(3) -0.001(3) 0.001(3) -0.002(3)
O4 0.070(5) 0.033(4) 0.034(4) 0.010(3) 0.004(3) 0.007(3)
C1 0.068(7) 0.080(11) 0.051(6) 0.002(6) -0.010(5) -0.036(7)
C2 0.059(7) 0.043(6) 0.052(6) 0.001(4) 0.016(5) -0.015(4)
C3 0.048(6) 0.036(6) 0.030(5) -0.002(4) 0.004(4) -0.001(4)
C4 0.043(5) 0.036(7) 0.039(5) -0.004(4) 0.011(4) 0.002(4)
C5 0.071(7) 0.029(5) 0.014(4) -0.002(3) -0.004(4) 0.011(4)
C6 0.038(5) 0.043(8) 0.027(5) 0.005(3) 0.003(4) -0.001(3)
C7 0.030(5) 0.042(6) 0.032(5) 0.001(3) 0.003(4) -0.002(3)
C8 0.037(4) 0.038(5) 0.029(4) -0.003(5) 0.009(3) -0.007(5)
C9 0.040(6) 0.045(6) 0.028(5) 0.006(4) 0.005(4) -0.001(4)
C10 0.042(6) 0.038(6) 0.033(5) -0.002(4) 0.016(4) -0.002(4)
C11 0.043(6) 0.039(6) 0.042(6) 0.006(4) 0.010(4) 0.000(4)
C12 0.044(6) 0.039(6) 0.034(6) 0.003(4) 0.004(4) 0.004(4)
C13 0.046(6) 0.064(9) 0.030(5) -0.003(4) 0.010(4) -0.005(4)
C14 0.049(6) 0.032(5) 0.019(5) -0.002(3) 0.006(4) 0.002(4)
C15 0.037(4) 0.027(5) 0.020(4) 0.001(4) -0.001(3) 0.003(4)
C16 0.045(6) 0.035(6) 0.030(6) -0.008(4) 0.005(4) 0.011(4)
C17 0.054(7) 0.040(6) 0.032(6) 0.009(4) 0.004(5) -0.005(5)
C18 0.040(5) 0.050(7) 0.031(4) 0.000(4) 0.009(4) 0.006(5)
C19 0.045(6) 0.047(6) 0.032(6) -0.012(4) 0.001(5) 0.008(4)
C20 0.056(7) 0.045(7) 0.028(6) 0.010(4) 0.005(5) -0.015(5)
C21 0.034(5) 0.049(6) 0.032(5) -0.002(4) 0.003(4) 0.003(4)
C22 0.047(5) 0.072(9) 0.029(5) 0.013(5) 0.006(4) -0.002(6)
C23 0.066(7) 0.038(6) 0.031(5) 0.007(4) -0.006(5) 0.005(5)
C24 0.041(6) 0.046(6) 0.036(6) 0.007(4) 0.002(4) -0.003(4)

_geom_special_details            
;
 All esds (except the esd in the dihedral angle between two l.s. planes)
 are estimated using the full covariance matrix.  The cell esds are taken
 into account individually in the estimation of esds in distances, angles
 and torsion angles; correlations between esds in cell parameters are only
 used when they are defined by crystal symmetry.  An approximate (isotropic)
 treatment of cell esds is used for estimating esds involving l.s. planes.
;

loop_
_geom_bond_atom_site_label_1
_geom_bond_atom_site_label_2
_geom_bond_distance
_geom_bond_site_symmetry_2
_geom_bond_publ_flag
Br1 C10 1.895(9) . ?
O1 C3 1.355(11) . ?
O1 C2 1.450(10) . ?
O2 C3 1.198(11) . ?
O3 C6 1.345(9) . ?
O3 C5 1.456(9) . ?
O4 C6 1.206(10) . ?
C1 C2 1.481(13) . ?
C1 H1A 0.9800 . ?
C1 H1B 0.9800 . ?
C1 H1C 0.9800 . ?
C2 H2A 0.9900 . ?
C2 H2AB 0.9900 . ?
C3 C4 1.528(13) . ?
C4 C5 1.528(11) . ?
C4 C13 1.533(11) . ?
C4 C14 1.544(12) . ?
C5 H5A 0.9900 . ?
C5 H5AB 0.9900 . ?
C6 C7 1.485(11) . ?
C7 C12 1.387(12) . ?
C7 C8 1.401(11) . ?
C8 C9 1.374(12) . ?
C8 H8 0.9500 . ?
C9 C10 1.391(13) . ?
C9 H9 0.9500 . ?
C10 C11 1.383(12) . ?
C11 C12 1.386(12) . ?
C11 H11 0.9500 . ?
C12 H12 0.9500 . ?
C13 H13A 0.9800 . ?
C13 H13B 0.9800 . ?
C13 H13C 0.9800 . ?
C14 C15 1.539(10) . ?
C14 H14A 0.9900 . ?
C14 H14B 0.9900 . ?
C15 C18 1.529(11) . ?
C15 C17 1.535(13) . ?
C15 C16 1.545(12) . ?
C16 C19 1.543(12) . ?
C16 H16A 0.9900 . ?
C16 H16B 0.9900 . ?
C17 C20 1.545(13) . ?
C17 H17A 0.9900 . ?
C17 H17B 0.9900 . ?
C18 C21 1.544(11) . ?
C18 H18A 0.9900 . ?
C18 H18B 0.9900 . ?
C19 C22 1.508(15) . ?
C19 C24 1.518(13) . ?
C19 H19 1.0000 . ?
C20 C23 1.529(14) . ?
C20 C22 1.537(15) . ?
C20 H20 1.0000 . ?
C21 C23 1.520(13) . ?
C21 C24 1.528(12) . ?
C21 H21 1.0000 . ?
C22 H22A 0.9900 . ?
C22 H22B 0.9900 . ?
C23 H23A 0.9900 . ?
C23 H23B 0.9900 . ?
C24 H24A 0.9900 . ?
C24 H24B 0.9900 . ?

loop_
_geom_angle_atom_site_label_1
_geom_angle_atom_site_label_2
_geom_angle_atom_site_label_3
_geom_angle
_geom_angle_site_symmetry_1
_geom_angle_site_symmetry_3
_geom_angle_publ_flag
C3 O1 C2 116.9(7) . . ?
C6 O3 C5 116.8(7) . . ?
C2 C1 H1A 109.5 . . ?
C2 C1 H1B 109.5 . . ?
H1A C1 H1B 109.5 . . ?
C2 C1 H1C 109.5 . . ?
H1A C1 H1C 109.5 . . ?
H1B C1 H1C 109.5 . . ?
O1 C2 C1 110.6(8) . . ?
O1 C2 H2A 109.5 . . ?
C1 C2 H2A 109.5 . . ?
O1 C2 H2AB 109.5 . . ?
C1 C2 H2AB 109.5 . . ?
H2A C2 H2AB 108.1 . . ?
O2 C3 O1 123.6(9) . . ?
O2 C3 C4 126.0(9) . . ?
O1 C3 C4 110.4(8) . . ?
C3 C4 C5 108.0(7) . . ?
C3 C4 C13 109.0(8) . . ?
C5 C4 C13 107.5(7) . . ?
C3 C4 C14 112.8(7) . . ?
C5 C4 C14 105.1(7) . . ?
C13 C4 C14 114.1(7) . . ?
O3 C5 C4 107.3(7) . . ?
O3 C5 H5A 110.2 . . ?
C4 C5 H5A 110.2 . . ?
O3 C5 H5AB 110.2 . . ?
C4 C5 H5AB 110.2 . . ?
H5A C5 H5AB 108.5 . . ?
O4 C6 O3 122.9(8) . . ?
O4 C6 C7 125.2(8) . . ?
O3 C6 C7 111.9(7) . . ?
C12 C7 C8 119.5(9) . . ?
C12 C7 C6 122.0(8) . . ?
C8 C7 C6 118.5(9) . . ?
C9 C8 C7 120.8(11) . . ?
C9 C8 H8 119.6 . . ?
C7 C8 H8 119.6 . . ?
C8 C9 C10 118.6(9) . . ?
C8 C9 H9 120.7 . . ?
C10 C9 H9 120.7 . . ?
C11 C10 C9 121.8(8) . . ?
C11 C10 Br1 119.4(7) . . ?
C9 C10 Br1 118.9(7) . . ?
C10 C11 C12 119.1(9) . . ?
C10 C11 H11 120.5 . . ?
C12 C11 H11 120.5 . . ?
C11 C12 C7 120.2(9) . . ?
C11 C12 H12 119.9 . . ?
C7 C12 H12 119.9 . . ?
C4 C13 H13A 109.5 . . ?
C4 C13 H13B 109.5 . . ?
H13A C13 H13B 109.5 . . ?
C4 C13 H13C 109.5 . . ?
H13A C13 H13C 109.5 . . ?
H13B C13 H13C 109.5 . . ?
C15 C14 C4 123.2(8) . . ?
C15 C14 H14A 106.5 . . ?
C4 C14 H14A 106.5 . . ?
C15 C14 H14B 106.5 . . ?
C4 C14 H14B 106.5 . . ?
H14A C14 H14B 106.5 . . ?
C18 C15 C17 108.6(8) . . ?
C18 C15 C14 114.2(6) . . ?
C17 C15 C14 113.4(7) . . ?
C18 C15 C16 107.5(7) . . ?
C17 C15 C16 107.9(7) . . ?
C14 C15 C16 104.7(7) . . ?
C19 C16 C15 111.4(7) . . ?
C19 C16 H16A 109.3 . . ?
C15 C16 H16A 109.3 . . ?
C19 C16 H16B 109.3 . . ?
C15 C16 H16B 109.3 . . ?
H16A C16 H16B 108.0 . . ?
C15 C17 C20 110.3(8) . . ?
C15 C17 H17A 109.6 . . ?
C20 C17 H17A 109.6 . . ?
C15 C17 H17B 109.6 . . ?
C20 C17 H17B 109.6 . . ?
H17A C17 H17B 108.1 . . ?
C15 C18 C21 111.3(6) . . ?
C15 C18 H18A 109.4 . . ?
C21 C18 H18A 109.4 . . ?
C15 C18 H18B 109.4 . . ?
C21 C18 H18B 109.4 . . ?
H18A C18 H18B 108.0 . . ?
C22 C19 C24 110.3(9) . . ?
C22 C19 C16 108.7(8) . . ?
C24 C19 C16 108.7(8) . . ?
C22 C19 H19 109.7 . . ?
C24 C19 H19 109.7 . . ?
C16 C19 H19 109.7 . . ?
C23 C20 C22 109.8(8) . . ?
C23 C20 C17 109.7(8) . . ?
C22 C20 C17 109.0(8) . . ?
C23 C20 H20 109.5 . . ?
C22 C20 H20 109.5 . . ?
C17 C20 H20 109.5 . . ?
C23 C21 C24 109.7(8) . . ?
C23 C21 C18 108.9(8) . . ?
C24 C21 C18 109.3(8) . . ?
C23 C21 H21 109.7 . . ?
C24 C21 H21 109.7 . . ?
C18 C21 H21 109.7 . . ?
C19 C22 C20 109.8(7) . . ?
C19 C22 H22A 109.7 . . ?
C20 C22 H22A 109.7 . . ?
C19 C22 H22B 109.7 . . ?
C20 C22 H22B 109.7 . . ?
H22A C22 H22B 108.2 . . ?
C21 C23 C20 109.4(8) . . ?
C21 C23 H23A 109.8 . . ?
C20 C23 H23A 109.8 . . ?
C21 C23 H23B 109.8 . . ?
C20 C23 H23B 109.8 . . ?
H23A C23 H23B 108.2 . . ?
C19 C24 C21 110.0(8) . . ?
C19 C24 H24A 109.7 . . ?
C21 C24 H24A 109.7 . . ?
C19 C24 H24B 109.7 . . ?
C21 C24 H24B 109.7 . . ?
H24A C24 H24B 108.2 . . ?

_refine_diff_density_max         0.482
_refine_diff_density_min         -0.946
_refine_diff_density_rms         0.099

_shelx_res_file                  
;
TITL cu_CHEM0884_0ma_b.res in P2(1)
    cu_CHEM0884.res
    created by SHELXL-2018/3 at 15:33:00 on 24-Aug-2020
REM Old TITL cu_CHEM0884_0ma in P2(1)
REM SHELXT solution in P2(1)
REM R1 0.135,  Rweak 0.030,  Alpha 0.005,  Orientation as input
REM Flack x =  0.059 ( 0.022 ) from Parsons' quotients
REM Formula found by SHELXT:  C24 Br O4
CELL  1.54178  12.9729   6.6129  12.9882   90.000  102.169   90.000
ZERR    2.000   0.0009   0.0005   0.0008    0.000    0.004    0.000
LATT -1
SYMM -X, 1/2+Y, -Z
SFAC C H BR O
UNIT 48 62 2 8
TEMP -73.150
SIZE 0.015 0.054 0.189
L.S. 40
ACTA
BOND $H
LIST 6
FMAP 2
PLAN 20
WGHT    0.025700    1.232200
FVAR       0.67643
BR1   3    0.902417    0.869416    1.197615    11.00000    0.05814    0.05627 =
         0.04252   -0.01326    0.01309   -0.00478
O1    4    0.849777    0.605158    0.514604    11.00000    0.04327    0.04163 =
         0.04465   -0.00226    0.00910   -0.00360
O2    4    0.708972    0.773505    0.546427    11.00000    0.06883    0.03012 =
         0.05089   -0.00369    0.01395    0.00695
O3    4    0.799696    0.410035    0.719923    11.00000    0.07512    0.03134 =
         0.02775   -0.00148    0.00116   -0.00165
O4    4    0.843167    0.130348    0.816989    11.00000    0.06975    0.03315 =
         0.03412    0.00964    0.00447    0.00747
C1    1    0.971230    0.833372    0.622818    11.00000    0.06772    0.07961 =
         0.05072    0.00210   -0.01000   -0.03597
AFIX 137
H1A   2    1.019453    0.719999    0.644983    11.00000   -1.50000
H1B   2    0.924365    0.848943    0.672420    11.00000   -1.50000
H1C   2    1.012023    0.957785    0.621697    11.00000   -1.50000
AFIX   0
C2    1    0.907538    0.793163    0.516071    11.00000    0.05866    0.04330 =
         0.05216    0.00143    0.01613   -0.01503
AFIX  23
H2A   2    0.857373    0.905787    0.494430    11.00000   -1.20000
H2AB  2    0.954471    0.785176    0.465178    11.00000   -1.20000
AFIX   0
C3    1    0.750991    0.617318    0.533018    11.00000    0.04837    0.03624 =
         0.03021   -0.00211    0.00429   -0.00056
C4    1    0.705302    0.405935    0.539509    11.00000    0.04350    0.03580 =
         0.03915   -0.00448    0.01054    0.00208
C5    1    0.781137    0.288061    0.624455    11.00000    0.07060    0.02912 =
         0.01449   -0.00218   -0.00358    0.01052
AFIX  23
H5A   2    0.749923    0.156170    0.637163    11.00000   -1.20000
H5AB  2    0.848349    0.262900    0.602009    11.00000   -1.20000
AFIX   0
C6    1    0.830307    0.311042    0.811730    11.00000    0.03784    0.04267 =
         0.02730    0.00462    0.00318   -0.00076
C7    1    0.846446    0.450630    0.903316    11.00000    0.03048    0.04190 =
         0.03160    0.00102    0.00344   -0.00201
C8    1    0.897239    0.376753    1.002109    11.00000    0.03652    0.03825 =
         0.02937   -0.00300    0.00860   -0.00651
AFIX  43
H8    2    0.920373    0.240163    1.008803    11.00000   -1.20000
AFIX   0
C9    1    0.914003    0.499453    1.089447    11.00000    0.04041    0.04548 =
         0.02803    0.00585    0.00525   -0.00125
AFIX  43
H9    2    0.949090    0.449547    1.156255    11.00000   -1.20000
AFIX   0
C10   1    0.878487    0.698299    1.077914    11.00000    0.04220    0.03832 =
         0.03258   -0.00230    0.01550   -0.00238
C11   1    0.828170    0.774874    0.981309    11.00000    0.04317    0.03904 =
         0.04232    0.00605    0.01018    0.00004
AFIX  43
H11   2    0.803373    0.910425    0.975303    11.00000   -1.20000
AFIX   0
C12   1    0.814415    0.651079    0.893340    11.00000    0.04447    0.03877 =
         0.03420    0.00269    0.00361    0.00355
AFIX  43
H12   2    0.782940    0.703710    0.825989    11.00000   -1.20000
AFIX   0
C13   1    0.600132    0.423844    0.574861    11.00000    0.04601    0.06376 =
         0.02954   -0.00284    0.01010   -0.00473
AFIX 137
H13A  2    0.554130    0.519241    0.528890    11.00000   -1.50000
H13B  2    0.612990    0.472775    0.647675    11.00000   -1.50000
H13C  2    0.566049    0.290966    0.570616    11.00000   -1.50000
AFIX   0
C14   1    0.698946    0.282607    0.437411    11.00000    0.04937    0.03211 =
         0.01885   -0.00182    0.00595    0.00175
AFIX  23
H14A  2    0.772476    0.260376    0.429925    11.00000   -1.20000
H14B  2    0.670467    0.148178    0.450181    11.00000   -1.20000
AFIX   0
C15   1    0.636908    0.353424    0.329145    11.00000    0.03651    0.02655 =
         0.02040    0.00100   -0.00084    0.00270
C16   1    0.641219    0.172456    0.254936    11.00000    0.04482    0.03509 =
         0.03037   -0.00750    0.00462    0.01099
AFIX  23
H16A  2    0.715736    0.139714    0.255181    11.00000   -1.20000
H16B  2    0.608853    0.052688    0.281178    11.00000   -1.20000
AFIX   0
C17   1    0.686553    0.536544    0.285590    11.00000    0.05424    0.04003 =
         0.03240    0.00914    0.00388   -0.00471
AFIX  23
H17A  2    0.761437    0.507640    0.285623    11.00000   -1.20000
H17B  2    0.683896    0.655453    0.331268    11.00000   -1.20000
AFIX   0
C18   1    0.520728    0.399666    0.325648    11.00000    0.03962    0.04998 =
         0.03065    0.00025    0.00854    0.00593
AFIX  23
H18A  2    0.515458    0.516929    0.371643    11.00000   -1.20000
H18B  2    0.487605    0.282008    0.352957    11.00000   -1.20000
AFIX   0
C19   1    0.582580    0.219438    0.141250    11.00000    0.04534    0.04699 =
         0.03234   -0.01174    0.00148    0.00849
AFIX  13
H19   2    0.586836    0.100102    0.095041    11.00000   -1.20000
AFIX   0
C20   1    0.626711    0.584070    0.172224    11.00000    0.05621    0.04516 =
         0.02793    0.00973    0.00457   -0.01492
AFIX  13
H20   2    0.659585    0.703966    0.144922    11.00000   -1.20000
AFIX   0
C21   1    0.460910    0.446951    0.212342    11.00000    0.03362    0.04887 =
         0.03174   -0.00167    0.00298    0.00342
AFIX  13
H21   2    0.385292    0.476468    0.212264    11.00000   -1.20000
AFIX   0
C22   1    0.633875    0.400043    0.101812    11.00000    0.04728    0.07225 =
         0.02854    0.01306    0.00643   -0.00196
AFIX  23
H22A  2    0.598029    0.430521    0.028354    11.00000   -1.20000
H22B  2    0.708755    0.369552    0.102623    11.00000   -1.20000
AFIX   0
C23   1    0.511197    0.630067    0.172078    11.00000    0.06588    0.03811 =
         0.03083    0.00728   -0.00598    0.00516
AFIX  23
H23A  2    0.506644    0.748196    0.217733    11.00000   -1.20000
H23B  2    0.473084    0.663225    0.099710    11.00000   -1.20000
AFIX   0
C24   1    0.467998    0.264809    0.141820    11.00000    0.04129    0.04603 =
         0.03610    0.00679    0.00210   -0.00309
AFIX  23
H24A  2    0.435215    0.145596    0.168103    11.00000   -1.20000
H24B  2    0.429083    0.293601    0.069195    11.00000   -1.20000
AFIX   0
HKLF 4


REM  cu_CHEM0884_0ma_b.res in P2(1)
REM wR2 = 0.129099, GooF = S = 1.11645, Restrained GooF = 1.11630 for all data
REM R1 = 0.049681 for 2660 Fo > 4sig(Fo) and 0.097156 for all 3902 data
REM 264 parameters refined using 1 restraints

END

WGHT      0.0257      1.2322

REM Highest difference peak  0.482,  deepest hole -0.946,  1-sigma level  0.099
Q1    1   0.9405  0.8828  1.1975  11.00000  0.05    0.48
Q2    1   0.8803  0.8702  1.3033  11.00000  0.05    0.48
Q3    1   0.8388  0.8693  0.3609  11.00000  0.05    0.44
Q4    1   0.7795  0.8126  1.1816  11.00000  0.05    0.42
Q5    1   0.8621  0.8723  1.1969  11.00000  0.05    0.40
Q6    1   0.7826  0.9224  1.1682  11.00000  0.05    0.38
Q7    1   1.0166  0.9402  1.2478  11.00000  0.05    0.38
Q8    1   0.9219  0.8679  1.0961  11.00000  0.05    0.36
Q9    1   0.9927  0.5745  0.6627  11.00000  0.05    0.35
Q10   1   0.8575  0.8640  0.6025  11.00000  0.05    0.35
Q11   1   1.0020  0.7428  1.0826  11.00000  0.05    0.33
Q12   1   0.8027  0.8266  1.1236  11.00000  0.05    0.32
Q13   1   0.6065  0.3557 -0.0384  11.00000  0.05    0.32
Q14   1   1.0094  0.7831  1.2587  11.00000  0.05    0.32
Q15   1   0.7980  0.4924  1.0739  11.00000  0.05    0.32
Q16   1   0.4643  0.8735  0.1019  11.00000  0.05    0.32
Q17   1   1.0166  0.8530  1.1830  11.00000  0.05    0.32
Q18   1   0.8623  0.8819  0.4407  11.00000  0.05    0.32
Q19   1   0.5928  0.0027  0.4761  11.00000  0.05    0.31
Q20   1   0.9165  0.3262  0.7611  11.00000  0.05    0.31
;
_shelx_res_checksum              48628

_shelx_hkl_file                  
;
   0   0   1   23.90    1.60
   0   0   1   28.80    6.70
   0   0  -1   26.00    3.40
   0   0   1   26.30    3.90
   0   0   2  311.17   21.70
   0   0   2  294.27   17.20
   0   0   2  267.47   23.50
   0   0   2  297.27   23.60
   0   0   3 4993.60  276.87
   0   0   3 4774.32  278.47
   0   0   3 4248.17  270.47
   0   0  -3 4543.95  278.07
   0   0  -3 4922.51  275.57
   0   0  -4  -16.20   25.50
   0   0  -4   29.60    9.90
   0   0   4   51.49   15.70
   0   0   4   64.99   21.80
   0   0   5  274.67   36.50
   0   0   5  286.97   35.50
   0   0  -5  351.66   29.80
   0   0  -5  354.46   55.29
   0   0  -6  620.04   45.50
   0   0   6  493.75   52.79
   0   0  -6  476.45   31.10
   0   0   6  600.84   52.59
   0   0  -6  439.06   79.39
   0   0   6  482.85   31.00
   0   0  -7  191.48   36.40
   0   0   7  163.98   39.40
   0   0   7  214.38   49.50
   0   0   7  178.78   13.00
   0   0  -8  492.75   65.79
   0   0   8  574.24   35.30
   0   0   8  625.04   67.49
   0   0  -8  655.23   45.60
   0   0   8  499.75   34.50
   0   0   9   46.40    8.60
   0   0  -9   45.50   21.30
   0   0   9  115.59   57.69
   0   0  10  499.95   56.59
   0   0  10  649.83  101.59
   0   0 -10  657.93   50.39
   0   0 -11  645.34   48.80
   0   0  11  444.96   54.69
   0   0 -12    1.70   21.40
   0   0  12   30.00   21.50
   0   0  13   41.20   17.30
   0   0 -13   80.99   25.50
   0   0  14    7.50   12.20
   0   0  15   25.50    9.90
   0   1   0    0.00    1.10
   0   1   0    1.90    7.00
   0  -1   0    0.00    2.80
   0   1   1  265.47   17.90
   0   1  -1  317.87   17.30
   0   1  -1  308.37   22.30
   0   1   1  285.87   20.60
   0   1   2  749.23   50.29
   0   1   2  752.22   52.59
   0   1  -2  760.22   50.39
   0   1   2  753.52   46.50
   0  -1  -2  804.62   51.59
   0  -1   2  851.51   54.19
   0  -1   2  865.41   51.29
   0  -1   2  836.82   49.30
   0   1   3 1388.26   89.89
   0   1   3 1361.56   83.69
   0   1   3 1371.26   91.69
   0   1  -3 1457.45   89.89
   0  -1  -3 1560.94   88.59
   0  -1   3 1501.25   93.09
   0  -1   3 1527.65   90.79
   0  -1  -3 1262.57   94.39
   0  -1   3 1501.45   89.19
   0   1  -4 1595.54  101.49
   0   1   4 1536.25  104.29
   0   1   4 1573.94   93.69
   0   1   4 1615.64  104.79
   0  -1  -4 1596.04  106.29
   0  -1   4 1645.14  105.49
   0  -1   4 1523.85  103.29
   0  -1  -4 1626.34   99.69
   0  -1   4 1763.52  102.39
   0   1   5  454.25   28.70
   0   1  -5  511.95   40.80
   0   1   5  452.65   45.00
   0   1   5  446.66   54.29
   0  -1   5  429.86   45.80
   0  -1   5  536.55   44.50
   0  -1  -5  576.64   54.49
   0  -1   5  459.05   28.20
   0   1  -6 1614.14  106.89
   0   1   6 1592.64  112.59
   0  -1   6 1708.63  110.09
   0  -1  -6 1530.05   92.39
   0  -1  -6 1836.02  105.39
   0  -1   6 1372.16   92.39
   0  -1   6 1558.74  111.59
   0   1   7   73.79   36.40
   0   1  -7   68.99   28.00
   0  -1  -7  123.09   53.49
   0  -1  -7  149.19   36.30
   0  -1  -7   98.39   11.40
   0  -1   7  125.69   39.20
   0  -1   7   92.19    8.10
   0  -1  -7  109.49    9.00
   0   1   8   43.70   48.40
   0   1  -8   57.29   26.60
   0   1  -8   73.19   38.70
   0  -1   8   52.49    8.40
   0  -1  -8   35.40    9.70
   0  -1   8   35.50    6.40
   0  -1  -8  187.78   89.29
   0  -1   8   17.70   41.90
   0  -1  -8   69.09   37.60
   0  -1  -8   49.40    9.40
   0   1  -9 1010.50   69.19
   0   1   9  838.22   96.59
   0   1   9  831.52   71.29
   0  -1   9  931.41   99.39
   0  -1   9  927.81   55.79
   0  -1  -9  974.00   55.89
   0  -1   9  905.81   54.89
   0   1  10  191.28   39.80
   0   1  10  221.88   80.19
   0   1 -10  229.68   49.20
   0   1 -10  240.28   37.00
   0   1  10  228.18   51.39
   0  -1  10  226.78   45.50
   0  -1 -10  228.98   29.30
   0  -1  10  225.68   16.90
   0  -1  10  217.48   16.50
   0  -1  10  292.67   86.69
   0  -1 -10  227.38   19.80
   0   1 -11  227.18   37.10
   0   1 -11  262.57   66.19
   0   1  11  259.47   97.39
   0   1  11  270.27   53.09
   0  -1  11  181.78  113.79
   0  -1 -11  170.18   28.70
   0  -1  11  191.28   16.10
   0   1 -12  135.29   55.19
   0   1  12  134.29   31.30
   0   1 -12  118.29   51.49
   0  -1 -12  154.18   28.00
   0  -1  12  174.78   32.80
   0   1  13   32.40   15.60
   0  -1 -13   31.40   20.30
   0  -1  13   47.70   19.60
   0   1  14   69.39   17.90
   0  -1  14  113.99   21.80
   0   1  15   -9.00    8.40
   0  -1  15    1.80   11.10
   0   2   0 2824.52  170.18
   0   2   0 2809.92  177.38
   0  -2   0 3191.08  174.58
   0   2   1   64.99   17.60
   0   2  -1   63.39   17.50
   0   2  -1   54.09    4.20
   0   2  -1   57.19   11.80
   0   2   1   54.89    4.50
   0  -2   1   36.00   10.60
   0  -2  -1   36.30    9.20
   0  -2  -1   29.80    9.10
   0   2   2  522.35   28.40
   0   2   2  509.75   39.60
   0   2  -2  501.35   34.80
   0  -2  -2  442.46   32.00
   0  -2  -2  417.76   33.50
   0  -2   2  424.56   36.50
   0  -2  -2  425.66   33.00
   0   2   3  101.39   20.60
   0   2   3  127.99   10.00
   0   2  -3  120.59   19.60
   0   2   3  130.19   24.20
   0  -2   3  154.18   27.50
   0  -2  -3  193.28   24.80
   0  -2   3  150.98    9.10
   0  -2   3  176.58   28.90
   0  -2  -3  181.58   20.20
   0  -2   3  181.68   45.70
   0  -2   3  158.68   17.60
   0   2   4   62.89    6.00
   0   2  -4   39.60   16.20
   0   2   4   74.59   28.30
   0   2   4   86.09   25.30
   0  -2  -4   49.40   23.20
   0  -2   4  112.79   29.10
   0  -2  -4   78.89   19.60
   0  -2   4   53.79   17.60
   0   2   5 1049.79   62.59
   0   2  -5 1076.09   77.29
   0   2   5  950.20   77.19
   0  -2  -5 1026.20   61.39
   0  -2   5 1120.89   81.09
   0  -2   5 1032.60   61.19
   0  -2  -5 1084.29   82.09
   0  -2   5 1089.89   73.59
   0   2   6   15.60   29.30
   0   2  -6   30.10   27.40
   0  -2   6  121.69   39.10
   0  -2  -6   30.80   35.20
   0  -2  -6   76.39    7.20
   0  -2   6   69.99    6.30
   0  -2  -6   45.20   24.40
   0  -2   6   45.60   27.40
   0   2  -7  126.79   39.50
   0   2   7  124.59   30.20
   0   2   7  107.99   25.70
   0   2   7  170.88   44.50
   0  -2  -7   93.29   12.50
   0  -2  -7  149.39   37.10
   0  -2  -7  107.29    9.10
   0  -2   7  111.79   13.90
   0  -2   7  111.09    8.40
   0  -2  -7  183.98   52.19
   0  -2   7   61.99   44.20
   0  -2   7   71.39   40.80
   0   2   8  282.57   34.50
   0   2  -8  290.37   45.10
   0   2   8  243.98   35.50
   0   2   8  277.07   59.09
   0  -2  -8  297.87   18.00
   0  -2  -8  230.88   20.60
   0  -2   8  266.57   20.20
   0  -2   8  259.27   17.30
   0  -2  -8  275.07   19.10
   0  -2   8  283.57   69.29
   0  -2  -8  251.67   70.39
   0   2  -9  206.98   44.20
   0   2   9  219.78   44.00
   0   2   9  247.78   51.99
   0   2  -9  224.28   43.60
   0   2   9  227.08   41.30
   0   2   9  292.67   85.99
   0  -2   9  181.78   60.09
   0  -2   9  272.57   19.40
   0  -2   9  248.38   16.70
   0  -2  -9  428.16  114.49
   0  -2  -9  260.47   17.70
   0  -2  -9  247.88   18.70
   0  -2   9  245.18   75.39
   0   2  10  318.17   45.50
   0   2 -10  388.16   44.10
   0   2  10  224.58   88.49
   0   2  10  432.56   41.70
   0   2 -10  371.56   47.70
   0   2  10  323.47   42.60
   0  -2 -10  336.37   24.00
   0  -2 -10  363.86   24.00
   0  -2  10  499.15  107.79
   0  -2  10  323.17   22.40
   0  -2  10  355.26   24.10
   0  -2  10  188.08   79.39
   0  -2  10  367.86   51.69
   0   2  11   56.19   21.90
   0   2 -11   17.50   21.80
   0   2 -11   41.70   44.80
   0   2  11   55.99   26.10
   0  -2  11   27.70    7.20
   0  -2 -11   52.59   20.70
   0  -2  11   72.59   29.20
   0  -2  11   33.20    6.90
   0  -2 -11   32.80    8.30
   0   2 -12  132.99   30.90
   0   2  12   86.69   23.50
   0   2  12  133.19   27.60
   0  -2 -12   96.09   23.90
   0  -2  12  114.09   11.50
   0   2 -13  128.69   26.00
   0   2  13   78.69   19.80
   0  -2 -13   86.29   20.20
   0   2  14    1.00   11.20
   0  -2 -14   -1.70   14.00
   0   3   0    9.70   21.20
   0   3   0    1.10    3.10
   0  -3   0   -0.90   14.90
   0  -3   0   30.20   19.50
   0   3   1 1361.16   78.19
   0   3  -1 1422.06   92.69
   0   3   1 1386.36   92.99
   0  -3  -1 1126.59   85.59
   0  -3  -1 1255.97   87.19
   0  -3   1 1433.46   95.69
   0   3   2  431.46   27.80
   0   3  -2  425.56   38.30
   0   3   2  502.45   45.20
   0  -3  -2  472.35   43.30
   0  -3  -2  413.86   32.30
   0  -3  -2  437.06   38.20
   0   3   3  475.35   28.50
   0   3   3  407.36   45.90
   0  -3   3  402.96   27.50
   0  -3   3  473.75   33.70
   0  -3   3  482.45   52.69
   0  -3  -3  437.96   40.90
   0  -3  -3  510.55   41.30
   0   3  -4 1282.57   86.89
   0   3   4 1253.87   89.79
   0   3   4 1187.58   70.29
   0  -3  -4 1138.09   84.69
   0  -3  -4 1096.39   68.49
   0  -3   4 1155.98   77.89
   0  -3   4 1172.58   93.79
   0  -3  -4 1166.08   81.19
   0   3  -5   -6.40   33.60
   0   3   5   52.19   36.20
   0   3   5   58.89   23.70
   0   3   5   63.89   21.70
   0  -3   5   50.89    7.20
   0  -3   5   -5.90   38.50
   0  -3  -5   41.70    6.20
   0  -3  -5   52.09   37.30
   0  -3  -5   66.99   34.70
   0  -3   5   37.70   25.50
   0   3   6  119.79   29.90
   0   3  -6  165.58   44.10
   0   3  -6  133.39   48.10
   0   3   6  124.99   26.60
   0   3   6  192.08   50.89
   0  -3  -6  129.89   18.10
   0  -3   6  155.68   51.59
   0  -3  -6  159.88   11.10
   0  -3   6  177.38   37.80
   0  -3   6  139.89   10.50
   0  -3  -6  144.59   44.70
   0   3   7  241.58   33.90
   0   3   7  252.57   60.79
   0   3   7  259.97   34.10
   0  -3   7  218.28   14.60
   0  -3  -7  161.68   55.09
   0  -3  -7  213.08   15.30
   0  -3  -7  205.48   18.70
   0  -3   7  227.58   21.60
   0  -3   7  222.68   68.89
   0  -3   7  240.98   54.29
   0   3   8  119.79   31.20
   0   3   8  113.79   29.90
   0   3   8  145.69   27.60
   0   3   8  154.28   34.00
   0   3  -8  158.58   39.50
   0   3   8   81.39   67.79
   0  -3   8  164.98   11.20
   0  -3   8  113.89   79.29
   0  -3   8  115.69   17.20
   0  -3  -8   46.10   66.99
   0  -3  -8  150.48   14.40
   0  -3  -8  161.08   11.70
   0   3  -9  113.79   26.50
   0   3   9   56.29   82.69
   0   3   9  148.69   30.70
   0   3   9  142.39   33.60
   0   3   9  123.29   27.80
   0   3   9  117.89   30.20
   0  -3   9  139.09   10.60
   0  -3  -9  116.19  103.49
   0  -3  -9  147.59   12.10
   0  -3   9  109.89   55.29
   0  -3   9  130.89   13.80
   0  -3  -9  107.09   19.10
   0  -3  -9  125.39   13.20
   0  -3   9   98.59   98.09
   0   3  10   30.90   23.60
   0   3 -10   28.20   20.20
   0   3  10   44.00   23.00
   0   3  10   32.00   21.90
   0   3  10   51.39  119.99
   0  -3  10   36.70    7.40
   0  -3 -10   19.40    6.70
   0  -3 -10   17.30    6.90
   0  -3  10   33.00    6.10
   0  -3  10  -42.40   78.59
   0   3 -11  127.09   28.90
   0   3  11  118.29   29.30
   0   3  11  173.38   30.20
   0   3  11  164.98   40.80
   0  -3 -11  172.98   16.90
   0  -3  11  164.38   12.50
   0   3 -12  129.49   26.20
   0   3  12  164.48   27.60
   0  -3  12  141.89   11.70
   0  -3 -12  135.19   14.60
   0  -3 -12  108.39   20.10
   0   3  13   58.69   16.70
   0   3 -13   53.89   14.70
   0  -3  13   58.99    9.50
   0   3  14   28.60    9.80
   0  -3 -14   33.30   13.20
   0   4   0  809.32   77.09
   0   4   0 1015.00   78.69
   0   4   1  199.38   45.10
   0   4   1  188.18   34.70
   0  -4   1  135.79   39.50
   0   4   2  445.36   42.80
   0   4   2  546.25   61.09
   0   4   2  442.16   42.20
   0  -4   2  449.56   72.89
   0  -4   2  399.16   29.00
   0   4   3  370.36   37.70
   0   4   3  333.17   37.20
   0   4   3  400.76   59.59
   0   4  -3  308.57   50.59
   0  -4   3  357.16   64.49
   0  -4  -3  303.97   46.40
   0   4   4  128.49   27.50
   0   4   4  172.78   48.70
   0   4   4  112.79   27.20
   0   4  -4  159.08   42.00
   0  -4  -4   38.70   37.90
   0  -4   4  129.89   30.40
   0  -4   4   98.99   60.19
   0   4  -5  185.28   53.99
   0   4   5  336.47   35.90
   0   4   5  397.56   71.99
   0   4   5  286.17   34.90
   0   4   5  290.07   67.09
   0  -4  -5  314.47   19.30
   0  -4  -5  234.18   52.89
   0  -4   5  305.97   48.40
   0  -4   5  242.68   69.59
   0   4   6  377.46   51.89
   0   4   6  345.97   37.60
   0   4   6  272.27   45.40
   0   4  -6  329.97   43.60
   0   4   6  324.77   37.20
   0  -4  -6  348.57   22.00
   0  -4  -6  231.58   58.29
   0  -4   6  311.07   57.99
   0  -4   6  459.15   93.89
   0  -4   6  365.46   21.50
   0   4   7  170.08   37.20
   0   4   7  134.49   71.99
   0   4   7  189.48   29.70
   0   4  -7  223.68   38.10
   0   4   7  119.19   31.70
   0   4   7  164.58   29.40
   0  -4  -7  150.48   19.20
   0  -4  -7  170.18   13.20
   0  -4  -7  186.58   18.30
   0  -4  -7  184.28   65.99
   0  -4   7  153.78   53.19
   0  -4   7  172.48   12.40
   0  -4   7   58.79   98.49
   0   4   8  229.08   45.90
   0   4   8  162.98   32.30
   0   4   8  182.68   29.60
   0   4   8    8.60   90.99
   0  -4   8  191.98   19.30
   0  -4  -8  211.68   16.70
   0  -4  -8  162.88   21.80
   0  -4   8  162.38   15.40
   0  -4  -8  210.78   15.40
   0  -4  -8   67.99   84.79
   0   4   9    6.70   20.70
   0   4   9    5.60   20.80
   0   4   9  -29.00   18.50
   0   4   9  -15.20   20.90
   0   4  -9    0.10   18.70
   0  -4  -9  -52.89  109.29
   0  -4  -9    0.90    6.00
   0  -4   9   -9.10    8.30
   0  -4  -9    5.60    6.90
   0  -4   9    0.60    5.00
   0  -4   9   47.30   67.29
   0   4 -10  184.18   29.70
   0   4  10  165.78   30.20
   0   4  10  189.88   31.10
   0   4  10  191.58   33.40
   0  -4  10  192.88   16.10
   0  -4 -10  208.58   15.70
   0  -4 -10  203.08   15.10
   0  -4  10  175.28   13.90
   0   4 -11   83.59   18.20
   0   4  11   44.20   16.80
   0   4  11   17.80   16.30
   0  -4 -11   94.89   16.60
   0  -4 -11   65.59    9.30
   0  -4  11   59.19    9.10
   0  -4  11   53.99    8.10
   0   4 -12    1.90   10.80
   0   4  12   25.50   13.90
   0   4  12   -3.40   11.60
   0   4  12   -2.20   28.80
   0  -4 -12   25.20   13.10
   0  -4  12   22.10    6.30
   0  -4  12   25.80    5.20
   0  -4 -12   23.60    6.70
   0   4  13   64.49   15.70
   0   4 -13   47.10   12.40
   0  -4  13   71.49    7.60
   0   5   0   23.70   24.90
   0   5   0    4.10   43.50
   0  -5   0   14.00   11.80
   0   5   1  129.59   30.30
   0   5  -1  155.08   37.80
   0   5   1  127.09   62.79
   0  -5  -1   83.69   16.30
   0   5   2  114.59   36.30
   0   5  -2  252.57   44.40
   0   5   2  167.28   30.50
   0   5   2  123.09   76.89
   0   5   2  183.88   32.20
   0  -5  -2  194.48   42.70
   0  -5  -2  157.48   18.80
   0  -5   2  177.68   85.79
   0   5  -3   44.80   37.50
   0   5   3   99.59   68.99
   0   5  -3  133.19   50.29
   0   5   3   70.79   30.60
   0   5   3  101.39   26.60
   0   5   3   73.69   24.90
   0  -5  -3  113.89   41.90
   0  -5  -3   89.59   15.50
   0  -5   3   99.59  117.89
   0   5   4  406.16   91.79
   0   5   4  455.85   45.80
   0   5   4  480.25   46.10
   0   5  -4  391.76   55.99
   0   5   4  465.75   49.50
   0  -5  -4  440.06   75.19
   0  -5   4  445.06  117.59
   0   5  -5  151.98   32.40
   0   5   5  107.99   34.80
   0   5   5  184.38   33.80
   0   5   5  174.88   32.60
   0   5   5  170.08   38.90
   0   5   5   87.39   84.69
   0  -5  -5  185.38   13.10
   0  -5  -5  117.19   20.20
   0   5   6  188.38   32.40
   0   5   6  193.58   45.20
   0   5   6   75.39   96.59
   0   5   6  154.38   33.10
   0   5   6  160.68   35.30
   0   5  -6  155.58   36.30
   0  -5  -6  136.99   23.70
   0  -5  -6  258.37   77.79
   0  -5   6  166.98   56.09
   0  -5   6  218.38   13.90
   0  -5  -6  195.98   14.40
   0   5   7  152.18   30.70
   0   5  -7  133.39   29.20
   0   5   7  161.88   39.30
   0   5   7  162.68   33.30
   0   5   7  182.48   32.50
   0  -5   7  182.58   13.10
   0  -5  -7  179.58   13.80
   0  -5  -7   56.19   87.49
   0  -5  -7  201.48   18.60
   0   5   8   -2.70   19.10
   0   5  -8   14.50   18.10
   0   5   8   -9.10   20.90
   0   5   8   33.40   37.30
   0  -5  -8   23.20    5.90
   0  -5   8   17.40    5.50
   0  -5  -8   16.90    8.30
   0  -5   8   24.20   11.20
   0   5  -9   63.39   18.00
   0   5   9   26.40   17.30
   0   5   9   81.99   20.20
   0   5   9   47.10   21.20
   0  -5   9   75.39    8.10
   0  -5  -9   56.09   10.20
   0  -5   9   67.69   12.20
   0  -5  -9   68.89    9.20
   0   5  10   12.40   17.00
   0   5  10   30.10   17.60
   0   5  10   13.00   16.20
   0   5 -10    9.50   14.90
   0  -5  10   17.90    5.00
   0  -5 -10   20.50    6.30
   0  -5 -10   39.20    7.70
   0  -5  10   31.00    6.60
   0   5  11   24.30   12.00
   0   5  11    7.10   16.00
   0   5 -11   14.00    9.70
   0   5  11    3.60   12.30
   0  -5 -11   19.00   11.30
   0   6   0   12.10   26.60
   0   6   1   31.10   26.00
   0   6   1   33.30   25.50
   0   6  -1   85.89   32.80
   0   6   2  139.29   32.00
   0   6   2  176.48   34.20
   0   6  -2   84.19   33.60
   0   6   3    9.30   28.30
   0   6   3   23.30   24.10
   0   6   3   16.20   21.90
   0  -6  -3   16.00   64.49
   0   6   4   12.10   22.80
   0   6   4   25.50   23.50
   0   6   4   20.20   20.10
   0   6  -4  -15.20   25.70
   0  -6  -4  131.59   74.99
   0   6   5   26.70   22.10
   0   6   5    8.70   24.70
   0   6   5   28.40   22.70
   0   6  -5   24.60   23.90
   0  -6  -5   29.30    7.10
   0   6  -6    2.00   18.10
   0   6   6   -2.60   18.60
   0   6   6   -4.40   18.40
   0   6   6   23.10   19.70
   0  -6   6   -1.10    6.30
   0  -6  -6   15.50    6.10
   0   6  -7   89.49   23.60
   0   6   7   35.30   23.00
   0   6   7   34.80   21.00
   0  -6   7   66.59   10.80
   0  -6  -7   82.39   12.60
   0  -6  -7   82.49   11.30
   0   6   8   -0.90   15.30
   0   6   8   15.80   15.80
   0   6   8    8.10   14.80
   0   6  -8   36.00   14.20
   0  -6   8   15.90    5.20
   0  -6  -8   26.00    6.60
   0  -6   8   25.20   13.40
   0  -6  -8   34.10    6.50
   0   6   9    2.70   12.10
   0   6   9  -13.10   14.70
   0   6  -9    1.70    9.30
   0  -6   9    8.20    6.00
   0  -6  -9    6.50    6.00
   0  -6  -9    9.70    5.20
   0  -6   9    0.90    4.80
   0   6  10   35.70   11.10
   0  -6  10   43.80    7.40
   0  -6 -10   35.00    6.80
   0   7   0   -8.30   33.50
   0   7   1   28.20   28.40
   0   7   2   21.90   23.50
   0   7   3    7.20   19.80
   0   7   3   10.50   18.80
   0   7   4   28.60   20.00
   0   7   4   21.20   17.50
   0   7   5   35.90   19.80
   0   7   5   28.00   19.20
   0   7   5   15.50   15.10
   0  -7  -5   26.10    6.60
   0   7   6    1.90   12.70
   0   7   6   24.80   16.90
   0   7   6    4.10   13.00
   0  -7  -6   19.60    8.20
   0   7   7   -7.40    9.90
   0   7   7    0.10   12.40
   0  -7  -7    7.30    6.20
  -1   0  15   10.50   11.20
   1   0 -14   51.29   23.50
  -1   0  14   -4.60   11.80
  -1   0  13   30.10   17.20
   1   0 -13   13.70   19.00
  -1   0  12   63.79   22.40
   1   0 -12  113.19   28.10
  -1   0  11  432.46   47.10
  -1   0  11  236.98   92.69
   1   0 -11  420.16   39.00
  -1   0  10  282.47  124.99
   1   0 -10  404.96   37.80
  -1   0  10  337.27   47.20
   1   0  -9  278.87   31.40
  -1   0   9  215.48   58.19
  -1   0   9  213.88   17.80
   1   0  -8   62.79   34.40
  -1   0   8   48.30   38.80
  -1   0   8   43.10    8.30
   1   0  -8   92.79   21.60
  -1   0   8   49.99    9.70
  -1   0   7  639.64   41.40
   1   0  -7  759.82   60.29
  -1   0   7  734.73   65.69
  -1   0   7  690.03   74.09
  -1   0   6   61.29    5.80
  -1   0   6   44.50   31.60
   1   0  -6  118.79   47.20
   1   0  -6   98.79   19.50
   1   0  -5 1343.87   83.29
   1   0  -5 1134.59   94.59
  -1   0   5 1275.77   73.49
  -1   0   5 1344.57   88.99
  -1   0   5 1168.58   86.29
  -1   0   4  135.89   25.00
   1   0  -4  130.99   33.30
  -1   0   4  140.89   26.60
  -1   0   4  150.18   23.70
  -1   0   4  108.39    7.80
   1   0  -4  127.69   16.60
  -1   0   3  290.57   26.10
   1   0  -3  272.07   31.80
  -1   0   3  287.17   28.50
  -1   0   3  316.47   18.20
  -1   0   3  315.57   28.30
   1   0  -3  325.77   24.00
   1   0  -2  164.88   14.10
  -1   0   2  159.28   17.90
  -1   0   2  158.38   17.90
  -1   0   2  137.09   14.90
  -1   0   2  181.18    9.90
   1   0  -2  155.38   21.00
   1   0  -1   36.40    8.10
  -1   0   1   30.20    7.70
  -1   0   1   21.80    4.40
  -1   0   1   27.50    2.00
   1   0  -1   26.70    4.70
   1   0   0  324.67   19.50
  -1   0   0  348.47   18.60
   1   0   0  273.87   19.60
  -1   0  -1  801.12   48.80
  -1   0  -1  810.82   47.40
   1   0   1  840.92   49.70
   1   0   1  837.22   48.90
   1   0   1  785.02   49.70
   1   0   2 1286.67   77.79
  -1   0  -2 1276.97   76.39
  -1   0  -2 1200.58   80.69
   1   0   2 1382.76   76.69
  -1   0  -2 1183.48   73.19
   1   0   2 1230.58   76.99
  -1   0  -3 1535.05  104.39
   1   0   3 1751.92   99.39
  -1   0  -3 1453.95   93.39
   1   0   3 1521.35   98.89
   1   0   3 1678.23  100.99
  -1   0  -3 1721.03   98.69
   1   0   4  744.73   56.39
   1   0   4  791.52   55.49
   1   0   4  834.22   57.59
  -1   0  -4  866.61   53.59
  -1   0  -4  735.83   66.39
  -1   0  -4  709.93   45.80
   1   0   5  114.69   27.20
  -1   0  -5  114.99    9.20
   1   0   5  126.79   28.40
  -1   0  -5  152.58   23.80
  -1   0  -5  171.88   48.40
  -1   0  -6  440.86   28.40
   1   0   6  514.15   53.99
   1   0   6  489.15   51.59
  -1   0  -7  953.10   75.69
   1   0   7  995.40   81.99
   1   0   7 1023.60   88.19
   1   0   7  899.41   55.99
   1   0   8   30.50    8.10
   1   0   8   32.70   44.70
  -1   0  -8   21.20   37.80
   1   0   8   28.50    6.70
  -1   0  -8   37.60   24.30
   1   0   9  393.96   53.19
   1   0   9  409.76   76.99
  -1   0  -9  523.45   43.70
   1   0   9  467.65   30.00
  -1   0 -10 1254.37   84.79
   1   0  10 1214.08   86.69
   1   0  11   59.89   22.90
   1   0  11    8.20  105.19
  -1   0 -11   72.69   26.70
   1   0  12    9.90   17.40
   1   0  13   46.40   16.10
   1   0  14   -4.90   11.20
   1   0  15    3.20    7.10
  -1   1  15    2.50    9.00
  -1  -1  15   -9.70   12.80
   1  -1 -15    3.40   17.40
   1   1 -14   36.30   33.30
  -1   1  14   33.10   13.40
  -1  -1  14   53.29   15.30
   1   1 -13   57.89   26.20
  -1   1  13   49.10   17.70
  -1  -1  13   79.59   22.00
   1  -1 -13   72.19   21.10
   1   1 -12    1.00   24.40
  -1   1  12    4.90   18.30
   1   1 -12    6.00   24.80
  -1  -1  12   12.00   23.60
   1  -1 -12   19.50   18.60
  -1   1  11   26.30   27.20
   1   1 -11   34.20   28.50
  -1   1  11   21.10   88.19
   1   1 -11   43.90   24.20
  -1  -1  11   48.50    9.90
  -1  -1  11   50.79   27.60
  -1  -1  11    6.60   94.19
   1  -1 -11   13.80   19.00
  -1   1  10   89.49   28.30
  -1   1  10  172.48   74.59
   1   1 -10   78.99   31.00
   1   1 -10  110.39   29.50
   1  -1 -10  140.79   26.20
   1  -1 -10   91.99   14.10
  -1  -1  10  109.39   11.10
  -1  -1  10  108.39   33.60
  -1  -1  10  103.69   11.60
  -1  -1  10   49.60   69.39
   1   1  -9  269.47   36.20
  -1   1   9  290.37   67.59
  -1  -1   9  270.37   18.60
  -1  -1   9  284.17   68.79
   1  -1  -9  354.46   30.60
   1  -1  -9  283.17   19.90
   1  -1  -9  277.17   20.20
  -1  -1   9  285.27   20.00
  -1  -1   9  130.69   65.29
  -1   1   8  499.65   65.79
   1   1  -8  444.06   60.79
   1   1  -8  428.56   41.90
  -1  -1   8  431.76   65.39
   1  -1  -8  459.05   95.19
  -1  -1   8  426.96   26.40
   1  -1  -8  410.86   27.30
  -1  -1   8  438.96   27.80
   1  -1  -8  392.26   60.89
  -1   1   7   48.60   34.10
   1   1  -7   19.40   24.50
  -1   1   7   33.90    6.60
  -1  -1   7   37.10    5.60
   1  -1  -7  -18.70   45.80
   1  -1  -7   63.99   25.60
  -1  -1   7   33.80   37.50
  -1  -1   7   12.60   32.50
   1  -1  -7   45.80    6.50
  -1   1   6  851.61   49.99
   1   1  -6  902.81   64.19
   1  -1  -6  739.03   49.20
   1  -1  -6  921.51   63.39
  -1  -1   6  872.71   67.29
   1  -1  -6  774.72   73.99
  -1   1   5  744.03   61.39
   1   1  -5  777.82   55.29
  -1   1   5  797.52   44.70
   1  -1  -5  758.32   64.99
  -1  -1   5  745.93   60.49
  -1  -1   5  661.13   56.39
   1  -1  -5  739.43   54.99
  -1   1   4  152.58   26.00
  -1   1   4  126.29   27.50
   1   1  -4  143.69   18.60
  -1   1   4  131.29    8.80
  -1  -1   4   96.49   21.90
  -1  -1   4  100.69   24.80
  -1  -1   4  104.99   26.80
   1  -1  -4  131.69   18.20
   1  -1  -4  123.69   24.90
   1   1  -3 2561.54  156.58
  -1   1   3 2438.86  151.28
  -1   1   3 2795.02  159.68
  -1   1   3 2670.43  158.48
  -1  -1   3 2693.13  157.98
   1  -1  -3 2409.06  159.18
   1  -1  -3 2630.74  156.98
  -1  -1   3 2683.23  156.48
  -1  -1   3 2639.14  160.58
  -1   1   2 2132.79  125.99
  -1   1   2 2053.99  125.59
   1   1  -2 2059.29  123.99
  -1   1   2 1983.30  120.39
  -1  -1   2 2071.79  123.29
   1  -1  -2 2062.39  123.09
   1  -1  -2 1967.90  124.49
  -1  -1   2 2265.57  124.89
  -1  -1   2 2277.07  128.89
  -1  -1   2 1933.91  119.99
  -1   1   1 5014.60  264.77
   1   1  -1 4491.25  265.27
   1   1  -1 5033.60  262.87
  -1   1   1 4221.48  260.67
  -1   1   1 4073.49  264.37
  -1  -1   1 4674.13  261.87
   1  -1  -1 4317.07  264.17
  -1  -1   1 4974.10  263.17
  -1  -1   1 3888.71  260.57
  -1   1   0 1342.17   84.19
   1   1   0 1315.97   81.99
   1   1   0 1331.37   87.69
  -1   1   0 1371.96   81.59
   1  -1   0 1489.15   84.49
  -1  -1   0 1592.64   82.39
   1   1   1 1874.11  113.69
  -1   1  -1 1880.31  108.09
  -1   1  -1 1873.41  111.59
   1   1   1 1762.12  108.99
  -1  -1  -1 1955.60  112.29
  -1  -1  -1 1870.21  108.99
   1  -1   1 1883.91  111.69
  -1   1  -2 2089.79  121.39
   1   1   2 2156.18  124.59
  -1   1  -2 2202.88  126.59
   1   1   2 2180.68  128.79
   1  -1   2 2098.39  126.69
  -1  -1  -2 2084.59  123.89
   1  -1   2 2125.59  124.89
  -1  -1  -2 1884.71  127.79
   1   1   3  204.18   25.10
  -1   1  -3  215.38   20.90
   1   1   3  163.48   22.10
   1  -1   3  216.38   22.40
  -1  -1  -3  223.08   31.00
  -1  -1  -3  252.37   19.40
   1  -1   3  248.88   26.60
   1  -1   3  217.08   24.20
   1   1   4 1039.10   74.09
  -1   1  -4 1027.80   71.09
   1   1   4 1024.30   73.49
  -1  -1  -4 1185.28   69.19
   1  -1   4 1051.69   74.99
   1  -1   4 1102.29   71.69
  -1  -1  -4 1007.90   76.29
   1   1   5 1822.42  117.69
   1   1   5 1637.94  120.39
  -1   1  -5 2047.20  115.39
   1  -1   5 1794.12  117.69
   1  -1   5 1682.33  101.69
  -1  -1  -5 1481.15  102.69
  -1  -1  -5 1742.43  119.99
  -1  -1  -5 1892.51  110.99
  -1   1  -6   35.40   20.40
   1   1   6   65.99   30.00
  -1  -1  -6    8.80    6.00
  -1  -1  -6   25.90   19.10
   1  -1   6   -2.60   26.40
  -1  -1  -6    7.80   47.10
   1  -1   6   18.30   33.00
   1   1   7 1107.19   88.89
  -1   1  -7 1086.49   88.59
  -1  -1  -7 1091.79   62.39
  -1  -1  -7  974.30   63.79
   1  -1   7 1132.69   85.99
  -1  -1  -7 1003.30   62.99
  -1  -1  -7 1159.58   82.09
  -1  -1  -7 1095.29  111.79
   1  -1   7  969.90   62.29
   1  -1   7 1056.79   63.49
   1  -1   7 1154.98   88.99
  -1   1  -8  -33.50   31.70
   1   1   8   26.20   45.20
  -1  -1  -8    8.50    7.10
   1  -1   8   20.60    7.00
   1  -1   8   34.10   47.50
  -1  -1  -8   29.00   41.60
   1  -1   8   15.20   45.40
   1  -1   8    5.30    4.60
   1   1   9  359.86   45.00
   1   1   9  367.96   73.99
  -1   1  -9  378.06   45.40
   1   1   9  262.67   62.39
   1  -1   9  358.86   79.69
   1  -1   9  373.06   85.39
   1  -1   9  357.86   23.60
  -1  -1  -9  411.86   25.60
   1   1  10  -17.40   28.70
   1   1  10   26.90   22.20
   1   1  10   43.40   73.19
  -1   1 -10   27.10   31.40
  -1   1 -10    9.70   30.60
   1  -1  10   37.90    7.40
   1  -1  10  -11.60   25.80
   1  -1  10   79.79   92.29
   1  -1  10   36.70    7.50
  -1  -1 -10    4.10   19.80
   1   1  11   87.09   29.20
   1   1  11  113.79  107.89
   1  -1  11  -73.79  133.19
   1   1  12  112.19   23.00
   1   1  12   98.09   28.00
   1  -1  12  108.39   26.50
  -1  -1 -12   83.99   34.20
   1   1  13   24.80   14.50
   1  -1  13   29.20   19.00
  -1  -1 -13   19.00   22.20
   1   1  14   38.90   11.60
   1  -1  14   46.90   12.60
  -1   2  14   73.69   18.60
   1  -2 -14   52.19   16.20
  -1   2  13   37.10   15.00
  -1   2  13   17.60   42.70
   1  -2 -13   39.90   16.70
   1   2 -12   53.59   30.10
  -1   2  12   75.99   24.30
  -1   2  12   61.29   18.50
   1   2 -12  120.09   31.30
  -1  -2  12   47.30   27.40
  -1   2  11    9.10   19.60
   1   2 -11   40.90   22.60
  -1   2  11  -53.59  102.29
  -1   2  11    4.40   23.50
   1   2 -11   33.20   28.80
  -1  -2  11   41.50    7.50
  -1  -2  11   31.20    7.00
   1  -2 -11   20.20    7.90
  -1  -2  11   -7.00   31.20
  -1  -2  11   97.39  119.59
   1  -2 -11   17.90   17.90
  -1   2  10   53.99   32.10
  -1   2  10   86.49   25.30
  -1   2  10   60.09   81.09
  -1   2  10   52.79   29.50
   1   2 -10   53.29   28.40
   1   2 -10   59.59   26.00
  -1  -2  10   68.19   10.40
  -1  -2  10  -35.30   71.19
   1  -2 -10   74.49   11.30
  -1  -2  10  -11.20   79.29
  -1  -2  10   82.29    8.60
   1  -2 -10   76.19   11.00
   1   2  -9   17.10   26.30
  -1   2   9   38.20   26.00
   1   2  -9   -0.70   27.20
  -1   2   9   10.10   27.60
  -1   2   9   22.40   31.80
  -1  -2   9   39.30    7.80
  -1  -2   9  -46.40   62.69
   1  -2  -9   19.20   12.70
   1  -2  -9   94.29   91.39
  -1  -2   9   34.40    5.90
   1  -2  -9   25.50    7.50
   1  -2  -9   29.80    6.10
  -1   2   8   74.09   23.80
  -1   2   8  101.39   29.10
   1   2  -8   71.59   29.30
  -1   2   8   90.89   47.30
  -1  -2   8   67.49    7.20
  -1  -2   8   69.09   12.00
   1  -2  -8   78.29   49.00
  -1  -2   8   40.00   47.20
   1  -2  -8   60.19    8.00
  -1  -2   8  -19.20   49.10
   1  -2  -8   75.49   57.69
   1  -2  -8   70.09   10.50
  -1   2   7  357.96   36.80
  -1   2   7  364.66   23.80
   1   2  -7  306.47   44.50
   1   2  -7  312.47   56.79
  -1   2   7  297.17   53.29
  -1   2   7  299.57   41.90
  -1  -2   7  375.16   52.19
  -1  -2   7  433.36   61.49
   1  -2  -7  409.86   53.39
  -1  -2   7  382.56   22.30
   1  -2  -7  374.76   22.40
   1  -2  -7  367.96   24.40
  -1  -2   7  349.77   25.90
  -1   2   6   56.69   32.10
  -1   2   6   47.40    6.30
   1   2  -6   34.70   24.20
   1  -2  -6  -40.00   37.20
  -1  -2   6   37.90    5.20
   1  -2  -6   48.40    5.90
  -1  -2   6   48.90   35.50
   1  -2  -6   37.70   22.30
  -1  -2   6   33.90   27.50
  -1   2   5 1845.42  104.29
   1   2  -5 1742.03  116.89
  -1  -2   5 1827.42  114.29
   1  -2  -5 1644.64  117.79
  -1  -2   5 1804.52  102.89
   1  -2  -5 1792.22  114.39
   1  -2  -5 1628.44  102.99
  -1  -2   5 1932.31  122.59
   1   2  -4  873.91   61.49
  -1   2   4  857.81   65.69
  -1   2   4  754.42   70.69
  -1   2   4  870.31   51.29
   1  -2  -4  856.21   61.49
  -1  -2   4  945.81   59.69
   1  -2  -4  817.02   61.49
  -1  -2   4  872.21   67.99
  -1   2   3  465.75   28.30
  -1   2   3  505.45   40.90
   1   2  -3  476.85   36.60
  -1   2   3  453.85   43.90
   1  -2  -3  449.86   36.20
  -1  -2   3  500.75   34.40
   1  -2  -3  414.86   35.50
  -1  -2   3  449.95   27.40
  -1  -2   3  464.05   44.40
  -1   2   2 1951.70  115.49
   1   2  -2 2098.79  120.59
  -1   2   2 2102.19  124.89
  -1  -2   2 2210.18  122.49
   1  -2  -2 1888.41  121.19
  -1  -2   2 1686.53  114.99
  -1   2   1  176.38   11.60
  -1   2   1  177.88   21.40
   1   2  -1  171.68   23.90
   1   2  -1  172.08   16.20
   1  -2  -1  172.48   19.40
   1  -2  -1  177.38   20.60
  -1  -2   1  198.88   18.10
   1   2   0  810.52   57.79
  -1   2   0  811.82   55.89
  -1   2   0  871.11   48.60
   1  -2   0  699.73   54.99
  -1  -2   0  925.31   51.99
   1  -2   0  813.62   54.29
   1   2   1  815.62   56.69
  -1   2  -1  776.62   52.09
  -1   2  -1  806.02   46.20
  -1   2  -1  785.82   53.69
   1  -2   1  731.33   52.89
  -1  -2  -1  875.61   53.79
  -1  -2  -1  736.43   49.10
  -1  -2  -1  779.92   48.70
  -1   2  -2   60.49   15.10
  -1   2  -2   51.79    4.40
   1   2   2   78.89   20.60
   1  -2   2   64.19   21.00
  -1  -2  -2   84.79   19.00
   1  -2   2   58.09   16.10
   1   2   3  399.86   36.80
  -1   2  -3  474.05   37.80
  -1   2  -3  464.25   26.30
   1   2   3  451.55   40.90
   1  -2   3  477.15   44.50
  -1  -2  -3  470.95   32.50
   1  -2   3  433.46   33.80
  -1  -2  -3  389.26   42.70
  -1   2  -4  221.58   29.20
   1   2   4  209.88   33.80
   1   2   4  205.48   37.80
   1  -2   4  198.18   26.80
  -1  -2  -4  162.48   12.10
  -1  -2  -4  186.88   35.90
   1  -2   4  183.48   35.20
  -1  -2  -4  205.18   23.20
  -1   2  -5  751.02   59.79
   1   2   5  509.25   93.79
   1   2   5  652.53   59.79
  -1  -2  -5  746.03   53.09
  -1  -2  -5  680.33   61.09
   1  -2   5  731.03   55.89
   1  -2   5  694.43   40.70
  -1  -2  -5  667.63   40.80
   1  -2   5  675.63   64.09
   1   2   6  515.45   59.39
  -1   2  -6  503.65   57.69
   1   2   6  482.55   43.40
   1  -2   6  558.64   30.60
  -1  -2  -6  476.55   66.19
   1  -2   6  573.24   61.99
  -1  -2  -6  511.45   30.90
  -1  -2  -6  435.46   32.50
  -1  -2  -6  576.94   51.89
   1   2   7  161.78   29.70
   1   2   7  284.27   57.69
   1   2   7  203.68   34.40
  -1  -2  -7  231.68   65.29
   1  -2   7  186.68   17.50
  -1  -2  -7  182.68   15.90
  -1  -2  -7  159.38   16.20
  -1  -2  -7  189.48   13.30
   1  -2   7  268.97   57.99
   1  -2   7  210.78   12.90
   1   2   8  476.45   45.40
   1   2   8  433.76   45.40
   1   2   8  404.16   72.59
  -1  -2  -8  616.04  101.69
  -1  -2  -8  389.26   31.50
   1  -2   8  392.96   80.89
   1  -2   8  483.25   28.20
  -1  -2  -8  474.35   28.60
   1  -2   8  494.35   30.30
   1  -2   8  368.36   64.19
  -1  -2  -8  477.35   29.50
   1   2   9  261.97   39.20
  -1   2  -9  259.47   40.00
   1   2   9  256.47   45.30
   1   2   9  258.77   40.90
   1   2   9  333.87   84.59
   1  -2   9  259.87   19.90
   1  -2   9  362.46  122.59
  -1  -2  -9  279.67   19.20
  -1  -2  -9  291.77   19.90
   1  -2   9  258.27   17.90
   1   2  10  285.77   41.40
   1   2  10  300.57   95.79
   1   2  10  250.97   41.80
  -1   2 -10  315.57   43.70
   1   2  10  252.47   38.30
  -1  -2 -10  239.38   26.70
  -1  -2 -10  328.47   21.10
   1  -2  10  294.57   20.90
   1  -2  10  337.27   46.90
   1   2  11  285.37   41.50
  -1   2 -11  308.27   41.60
   1   2  11  358.36   40.80
   1  -2  11  349.37   23.20
   1  -2  11  419.46   44.70
  -1  -2 -11  376.06   25.70
   1  -2  11  358.26   23.70
   1   2  12   44.60   19.60
   1   2  12   21.20   17.90
  -1   2 -12    4.80   20.00
   1  -2  12   24.40    6.40
  -1  -2 -12   14.60   16.80
   1  -2  12   14.80   17.00
   1   2  13   -4.00   17.90
   1   2  13   14.00   18.30
  -1   2 -13    2.00   17.20
  -1  -2 -13    4.20   15.70
   1  -2  13   -2.60   15.30
   1   2  14   13.20    9.80
   1  -2  14    7.30   12.50
  -1  -2 -14   16.80   16.70
  -1   3  14   30.90   16.50
  -1   3  14   21.60   10.60
   1   3 -13    8.30   12.20
  -1   3  13   20.60   15.90
  -1   3  13   26.30   13.50
  -1  -3  13   25.00    5.40
   1  -3 -13   13.90   13.20
  -1   3  12   -9.40   15.80
   1   3 -12   16.90   17.50
  -1   3  12    3.60   16.20
   1  -3 -12    8.50    6.60
  -1  -3  12   11.20    6.90
   1  -3 -12   21.60   14.90
  -1  -3  12   15.80    5.60
  -1   3  11  102.29   24.00
  -1   3  11  146.49   30.30
   1   3 -11  125.29   29.40
  -1  -3  11  107.39   10.90
   1  -3 -11  105.19   13.90
  -1  -3  11  114.99   11.80
   1  -3 -11  109.99   21.30
  -1  -3  11  198.38  124.19
   1  -3 -11  118.89   13.30
  -1   3  10   79.39   23.40
  -1   3  10   16.40   23.00
   1   3 -10   77.59   22.90
   1   3 -10    0.90   31.60
  -1   3  10  -36.70  104.79
  -1   3  10   55.19   22.90
  -1  -3  10  165.78   78.69
   1  -3 -10   44.90    8.00
  -1  -3  10   94.39  117.49
   1  -3 -10   49.60    9.90
   1  -3 -10 -103.89  178.18
  -1  -3  10   65.19   11.10
  -1  -3  10   58.79    7.90
  -1   3   9  609.24  111.39
  -1   3   9  446.86   42.40
  -1   3   9  451.45   48.30
  -1   3   9  420.06   45.70
  -1   3   9  407.06   42.80
   1   3  -9  330.47   51.39
   1   3  -9  460.05   46.30
  -1  -3   9  459.15   29.80
   1  -3  -9  458.75   28.40
  -1  -3   9  577.34  112.89
   1  -3  -9  425.16  101.49
  -1  -3   9  456.55   27.90
   1  -3  -9  481.45   29.60
  -1   3   8  266.97   41.90
   1   3  -8  257.07   47.90
   1   3  -8  333.17   44.60
  -1   3   8  337.27   44.90
  -1   3   8  319.07   36.80
  -1   3   8  271.47   35.60
  -1  -3   8  388.26   66.79
  -1  -3   8  139.39   72.69
  -1  -3   8  335.47   20.30
   1  -3  -8  341.17   20.70
   1  -3  -8  264.67   67.49
   1  -3  -8  328.57   22.40
   1   3  -7  103.79   35.90
  -1   3   7  122.29   54.29
  -1   3   7   68.69   23.70
  -1   3   7   76.79   23.10
  -1  -3   7   64.79    7.10
   1  -3  -7  -17.20   46.90
  -1  -3   7   40.50   37.30
   1  -3  -7   70.59   13.90
   1  -3  -7   59.29    7.60
  -1  -3   7  113.49   54.79
  -1  -3   7   60.89   12.80
  -1   3   6  589.84   35.30
  -1   3   6  567.84   46.20
   1   3  -6  469.35   73.69
  -1   3   6  583.94   47.20
   1   3  -6  619.24   57.79
  -1   3   6  520.85   68.29
  -1  -3   6  577.34   33.10
   1  -3  -6  425.46   64.49
  -1  -3   6  507.25   69.59
  -1  -3   6  581.14   55.79
   1  -3  -6  491.35   33.10
   1  -3  -6  482.25   66.59
  -1   3   5  173.28   29.40
  -1   3   5  192.08   14.20
  -1   3   5  187.58   32.90
  -1   3   5  203.68   45.20
   1   3  -5  248.58   52.99
   1  -3  -5  209.08   43.90
   1  -3  -5  197.28   45.40
  -1  -3   5  193.08   33.80
   1  -3  -5  167.08   12.70
  -1  -3   5  181.88   12.50
  -1  -3   5  233.88   49.70
  -1   3   4   12.50    5.10
  -1   3   4   28.60   30.10
   1   3  -4   -6.40   22.50
   1  -3  -4   18.40   22.30
  -1  -3   4   28.40   18.00
   1  -3  -4   25.10   22.40
  -1  -3   4   25.40   33.70
  -1   3   3 1155.68   65.69
   1   3  -3 1252.67   78.79
  -1  -3   3 1016.80   64.59
   1  -3  -3 1030.80   71.89
  -1  -3   3 1087.59   70.39
   1  -3  -3 1067.99   77.39
  -1   3   2   14.70   23.10
   1   3  -2   44.40   15.30
  -1   3   2   39.70    5.00
   1  -3  -2   38.90   17.40
  -1  -3   2   37.10    6.10
  -1   3   1  519.25   31.60
   1   3  -1  509.75   47.40
  -1   3   1  543.35   47.30
  -1  -3   1  460.75   31.80
  -1  -3   1  584.54   48.10
   1  -3  -1  533.05   44.30
   1   3   0   84.89   27.00
  -1   3   0   70.19    6.40
  -1   3   0   98.29   26.50
  -1  -3   0   56.29   16.00
  -1  -3   0  127.29   26.60
   1  -3   0  104.29   23.00
  -1   3  -1  403.76   39.80
  -1   3  -1  373.76   22.30
   1   3   1  349.87   38.30
  -1  -3  -1  305.67   31.10
  -1  -3  -1  350.86   33.60
  -1   3  -2  904.01   52.49
  -1  -3  -2  803.92   58.69
  -1  -3  -2  968.20   61.39
  -1  -3  -2  879.41   63.99
  -1   3  -3   44.20   20.50
   1   3   3   15.20   26.10
   1  -3   3   40.50   33.00
  -1  -3  -3    3.20   25.60
  -1  -3  -3   19.60   14.60
   1  -3   3    8.90   13.20
   1   3   4  287.87   38.20
   1   3   4  322.47   38.10
   1   3   4  293.37   45.40
  -1   3  -4  337.57   47.40
   1  -3   4  469.85   57.79
   1  -3   4  385.96   37.50
  -1  -3  -4  399.26   49.80
  -1  -3  -4  401.16   22.10
   1   3   5  304.27   35.60
   1   3   5  243.88   47.90
  -1   3  -5  275.17   56.79
   1   3   5  307.47   35.60
   1  -3   5  218.78   50.69
   1  -3   5  317.17   18.90
  -1  -3  -5  285.57   53.39
   1  -3   5  265.27   40.20
   1   3   6  106.19   29.60
   1   3   6   89.19   24.80
   1   3   6  119.29   47.20
   1  -3   6  121.39   35.90
  -1  -3  -6   57.99   10.70
  -1  -3  -6   21.00   43.20
   1  -3   6   87.39    7.70
  -1  -3  -6   88.59    8.30
   1  -3   6  126.49   56.19
  -1  -3  -6   87.99   14.60
   1   3   7  330.17   37.40
  -1   3  -7  302.87   44.60
   1   3   7  368.96   38.20
   1   3   7  281.57   48.20
   1   3   7  386.96   71.29
   1  -3   7  354.36   26.90
  -1  -3  -7  406.96   87.09
  -1  -3  -7  351.96   22.20
  -1  -3  -7  274.87   25.70
  -1  -3  -7  364.86   24.60
   1  -3   7  280.67   78.19
   1  -3   7  391.66   21.60
  -1   3  -8   22.30   21.50
   1   3   8   43.80   30.30
  -1   3  -8   59.29   27.10
   1   3   8   31.30   20.50
   1   3   8   23.00   27.90
   1   3   8   79.99   68.99
   1   3   8   63.29   22.80
   1  -3   8   84.39   89.09
   1  -3   8  -38.00   42.40
  -1  -3  -8   47.70    8.20
  -1  -3  -8   38.90    7.40
  -1  -3  -8   23.40   14.30
  -1  -3  -8  143.89   82.69
   1  -3   8   50.69    9.50
   1  -3   8   48.70    6.50
   1   3   9  147.39   32.90
   1   3   9  136.09   31.20
  -1   3  -9  186.78   35.50
   1   3   9  137.39   28.60
   1   3   9  118.89   28.80
   1   3   9  -46.50   89.99
   1  -3   9  141.69   14.70
  -1  -3  -9  155.78   13.50
  -1  -3  -9  122.39   22.10
  -1   3 -10   11.80   20.80
   1   3  10   19.60   21.30
   1   3  10   19.80   22.80
   1   3  10   25.20   23.10
  -1  -3 -10   11.90    7.30
   1  -3  10   11.10    5.70
   1  -3  10   10.00   29.40
   1  -3  10   12.00    7.00
   1  -3  10   57.29   81.29
  -1  -3 -10    8.20    7.00
   1   3  11   51.89   18.20
   1   3  11   57.19   23.50
  -1   3 -11   44.20   17.80
   1   3  11  109.39   25.40
   1  -3  11   82.99    9.20
   1  -3  11   78.39   10.60
   1  -3  11   51.09   24.70
  -1  -3 -11   93.29   10.90
   1   3  12  117.89   27.70
   1   3  12  126.79   25.20
   1  -3  12  120.49   30.30
   1  -3  12  107.39   12.60
   1  -3  12  135.99   11.30
  -1   3 -13   32.40   13.30
   1   3  13   -3.70   13.20
   1   3  13   19.20   11.90
  -1  -3 -13   47.90   16.00
  -1   4  13   28.30   10.80
   1   4 -13   24.80    9.60
  -1   4  13    9.90   11.10
  -1  -4  13   32.00    6.20
  -1   4  12  125.69   23.90
  -1   4  12  177.68   26.20
  -1  -4  12  189.58   13.50
   1  -4 -12  198.68   14.50
  -1  -4  12  183.88   13.90
  -1   4  11    3.80   15.80
  -1   4  11   28.80   16.40
   1   4 -11    8.40   14.30
  -1   4  11  -18.90   16.90
   1  -4 -11    9.40    7.90
  -1  -4  11    8.20    5.20
  -1  -4  11   13.90    5.80
   1  -4 -11   12.80    5.90
   1   4 -10   29.40   17.10
  -1   4  10   21.10   19.20
  -1   4  10   -2.40   31.50
  -1   4  10   16.50   19.40
   1  -4 -10   23.00    6.40
  -1  -4  10   24.20   10.30
  -1  -4  10   20.60    5.50
  -1   4   9   69.59   24.30
  -1   4   9  111.09   26.30
  -1   4   9  120.79   27.60
   1   4  -9  130.39   32.30
  -1   4   9  109.99   28.30
  -1  -4   9  142.59   11.00
   1  -4  -9  126.59   11.90
  -1  -4   9  138.29   14.40
   1  -4  -9  141.79   13.70
   1  -4  -9   55.49  109.39
   1   4  -8  -19.70   34.10
  -1   4   8   25.00   20.40
  -1   4   8  -10.50   20.10
  -1   4   8    3.40   89.79
  -1   4   8  -16.30   22.70
   1   4  -8   -1.30   28.60
   1  -4  -8   81.69   72.49
  -1  -4   8  -98.89  105.89
   1  -4  -8  -24.60   14.10
   1  -4  -8    9.50    8.40
  -1  -4   8  -90.09   60.29
  -1  -4   8    8.20    9.90
  -1   4   7  108.09   26.00
  -1   4   7  114.49   29.30
  -1   4   7   88.69   25.90
  -1   4   7    2.20   71.39
   1   4  -7  104.99   37.20
   1   4  -7  112.99   27.70
  -1   4   7   74.19   27.40
   1  -4  -7  114.19    9.80
  -1  -4   7  141.79   85.19
  -1  -4   7  126.69   50.59
   1  -4  -7  116.99   61.39
   1  -4  -7   97.29   16.40
  -1  -4   7   85.39    9.30
   1   4  -6   62.29   33.30
  -1   4   6   67.49   23.70
  -1   4   6   87.99   28.30
  -1   4   6   37.70   59.89
  -1   4   6   99.89   25.90
   1   4  -6   81.49   30.10
  -1   4   6   95.19   29.20
   1  -4  -6   29.70   51.39
  -1  -4   6   79.09    8.40
   1  -4  -6   93.39    9.30
  -1  -4   6  144.39   41.30
  -1  -4   6   99.19   70.49
  -1   4   5  546.85   49.20
  -1   4   5  457.95   45.90
  -1   4   5  481.35   72.19
  -1   4   5  585.54   35.60
   1   4  -5  515.25   55.39
   1  -4  -5  555.74   32.70
  -1  -4   5  523.85   79.29
  -1  -4   5  557.74   57.69
   1  -4  -5  546.85   67.29
  -1   4   4  176.68   33.00
  -1   4   4  158.58   14.30
   1   4  -4  185.58   40.90
   1   4  -4  167.28   53.99
  -1   4   4  137.89   48.80
  -1   4   4  176.08   30.00
   1  -4  -4  241.48   46.10
  -1  -4   4  192.78   35.30
  -1  -4   4  146.99   58.49
  -1   4   3  146.59   12.70
   1   4  -3  151.08   36.30
  -1   4   3  137.29   33.10
  -1   4   3  159.38   50.39
  -1   4   3  153.18   31.20
   1  -4  -3  167.38   29.50
  -1  -4   3  148.99   27.70
  -1  -4   3  149.09   51.79
  -1   4   2  251.77   17.90
   1   4  -2  260.87   41.20
  -1   4   2  361.66   53.69
  -1   4   2  262.77   36.10
  -1   4   2  210.68   35.40
  -1  -4   2   78.39   66.49
   1  -4  -2  288.67   55.49
   1   4  -1  125.29   42.10
  -1   4   1  105.79    9.50
  -1   4   1   90.29   28.80
  -1   4   1  130.89   42.90
  -1  -4   1   87.69   10.30
   1  -4  -1  103.09   36.70
  -1   4   0  328.47   48.40
   1   4   0  412.36   53.09
  -1   4   0  346.57   21.70
   1   4   0  298.47   36.90
  -1  -4   0  303.27   22.90
   1  -4   0  328.77   64.79
   1   4   1   96.89   24.80
   1   4   1  151.98   41.10
   1   4   1   76.69   28.60
  -1  -4  -1   69.09   10.30
   1  -4   1  108.39   41.60
   1   4   2   72.29   26.30
   1   4   2   30.40   38.00
   1   4   2   63.59   24.50
   1  -4   2   70.29   48.40
   1  -4   2   -7.90   44.30
  -1  -4  -2   73.49   28.70
   1   4   3  540.05   46.90
   1   4   3  496.35   46.20
   1   4   3  598.04   63.89
   1  -4   3  599.94   78.89
  -1  -4  -3  537.65   56.59
   1   4   4   69.19   22.70
   1   4   4   51.19   21.60
   1   4   4    7.50   41.40
   1  -4   4   89.89   63.09
   1  -4   4   41.00   27.00
  -1  -4  -4   44.90   37.20
  -1  -4  -4   36.00   10.00
  -1  -4  -4   42.50    7.00
   1   4   5  260.97   65.99
  -1   4  -5  192.38   37.70
   1   4   5  177.48   35.30
   1   4   5  165.78   40.20
   1   4   5  214.78   41.60
  -1  -4  -5  218.38   13.80
   1  -4   5  207.78   45.70
  -1  -4  -5  157.58   50.59
  -1  -4  -5  166.48   18.30
   1   4   6  546.35   91.69
  -1   4  -6  457.05   48.90
   1   4   6  434.46   56.89
   1   4   6  453.55   43.60
   1   4   6  403.36   47.90
   1   4   6  454.75   43.40
   1  -4   6  467.75   28.00
  -1  -4  -6  475.35   28.60
   1  -4   6  455.05   64.39
  -1  -4  -6  449.56   78.39
   1   4   7   49.20   21.50
  -1   4  -7   35.10   24.90
   1   4   7   33.40   26.10
   1   4   7   -8.20   19.40
   1   4   7  170.18   79.79
   1   4   7   -6.20   28.70
  -1  -4  -7   43.10    9.90
  -1  -4  -7   36.30    6.20
  -1  -4  -7 -108.79   72.49
   1  -4   7   26.40    5.30
  -1  -4  -7   26.60   13.60
   1   4   8   83.09   30.50
   1   4   8   86.39   25.00
   1   4   8   63.79   94.89
   1   4   8   80.09   26.00
   1   4   8   95.79   25.40
  -1   4  -8   72.59   23.40
  -1  -4  -8   33.00   90.69
   1  -4   8   67.09    7.70
  -1  -4  -8   50.59   17.90
  -1  -4  -8   81.79   11.80
   1  -4   8  121.49   53.99
   1  -4   8   42.10   10.90
  -1  -4  -8   48.70    8.70
   1   4   9    9.70   22.40
  -1   4  -9   42.00   20.00
   1   4   9   -6.90   18.90
   1   4   9   32.80   19.50
   1   4   9   27.40   21.20
   1  -4   9  -45.30   67.89
   1  -4   9   22.10    5.40
  -1  -4  -9  -74.49  115.09
   1  -4   9   25.50    8.10
   1   4  10  145.79   27.60
   1   4  10   96.99   26.40
  -1   4 -10  139.39   28.00
  -1  -4 -10  172.78   13.30
  -1  -4 -10  150.68   13.30
   1  -4  10  136.59   11.60
   1  -4  10  136.59   13.60
   1   4  11   40.00   18.80
   1  -4  11   30.80    6.10
  -1  -4 -11   26.10    6.20
  -1  -4 -11   48.50   10.80
   1   4  12   13.30   17.90
  -1   4 -12   34.80   12.60
   1   4  12   29.90   13.80
   1   4  12   17.20   12.00
   1  -4  12   30.80    6.60
   1  -4  12   35.20    6.60
   1   5 -12   -0.60    7.50
  -1   5  12    3.90    7.90
  -1   5  12    4.70   11.10
  -1   5  12  -10.10   13.30
  -1  -5  12    6.10    3.80
   1  -5 -12   -4.20    5.50
   1  -5 -12    9.90   10.40
  -1   5  11   12.50   12.00
   1   5 -11   21.30   11.50
  -1   5  11   10.10   14.40
  -1   5  11    6.70   12.30
   1  -5 -11    0.40   11.40
   1  -5 -11   20.90    8.80
  -1  -5  11   38.70    7.10
   1  -5 -11   36.40    7.10
  -1   5  10   -2.80   13.90
  -1   5  10    1.80   16.40
   1  -5 -10   24.00    6.30
   1  -5 -10   17.90    6.30
  -1  -5  10   29.20    6.40
  -1  -5  10   29.90    8.20
  -1   5   9   12.30   16.50
  -1   5   9   18.80   19.30
  -1   5   9   21.30   17.90
   1   5  -9   37.40   16.00
  -1  -5   9   41.20    8.40
   1  -5  -9   40.40    7.90
   1  -5  -9   47.00    8.60
  -1  -5   9   56.39    7.20
   1   5  -8  117.59   26.20
  -1   5   8  111.39   25.60
  -1   5   8  118.99   34.20
  -1  -5   8  144.89   17.70
   1  -5  -8  106.69   21.60
  -1  -5   8  115.89   10.70
   1  -5  -8  136.59   11.30
   1  -5  -8  183.28  108.09
  -1   5   7   20.80   20.70
  -1   5   7  -19.50   19.70
  -1   5   7   -3.50   25.10
   1   5  -7    3.20   20.90
   1   5  -7   24.20   55.49
  -1   5   7    6.10   20.90
   1  -5  -7   -9.50    9.90
   1  -5  -7    9.30    5.80
  -1  -5   7   -9.60   62.89
   1  -5  -7   15.70   77.99
  -1  -5   7    8.60    5.60
  -1   5   6   43.60   22.70
  -1   5   6   55.69   23.50
   1   5  -6   21.30   30.70
   1   5  -6    2.60   34.00
  -1   5   6  -51.09   96.69
  -1   5   6   26.50   40.20
  -1   5   6   29.10   21.80
  -1  -5   6  -53.69   52.59
  -1  -5   6   41.00    7.50
   1  -5  -6   32.90    6.90
  -1  -5   6   38.50  139.09
   1  -5  -6   44.40   60.59
  -1   5   5   86.49   27.00
  -1   5   5   84.89   25.20
   1   5  -5   49.80   33.30
  -1   5   5   84.89   27.70
   1   5  -5   73.59   30.00
  -1   5   5  -65.29   81.99
  -1   5   5   65.39   24.10
  -1  -5   5   13.60  113.79
   1  -5  -5   60.09    9.80
  -1   5   4   90.39   74.59
   1   5  -4  218.78   43.20
  -1   5   4  176.88   31.60
  -1   5   4  231.28   42.00
   1   5  -4  213.08   53.19
  -1   5   4  215.18   47.00
  -1   5   4  251.47   36.80
  -1  -5   4  299.87  109.99
  -1  -5   4  319.67   53.89
   1  -5  -4  177.88   55.19
   1   5  -3  236.08   43.10
  -1   5   3  258.37   38.10
  -1   5   3  275.47   44.30
  -1   5   3  210.98   33.70
  -1  -5   3  289.17   43.60
   1  -5  -3  281.37   53.79
  -1   5   2  -15.60   34.10
  -1   5   2  -14.50   22.20
  -1   5   2    7.40   67.09
   1   5  -2   -5.70   36.10
  -1   5   2    1.70   36.00
  -1  -5   2  -18.00   78.89
  -1   5   1  489.25   44.30
  -1   5   1  486.55   49.50
  -1  -5   1  362.66   31.40
  -1   5   0    3.20   29.20
  -1   5   0    4.00   27.70
   1   5   0   29.70   58.39
  -1  -5   0   24.90   11.90
  -1   5  -1   -9.10   31.20
   1   5   1    0.60   60.59
   1   5   1   32.70   27.20
   1   5   1   56.99   23.90
  -1  -5  -1  133.29   40.20
  -1  -5  -1   26.10   11.70
  -1   5  -2  271.47   62.79
   1   5   2  277.07   38.20
   1   5   2  335.97   38.70
   1  -5   2  194.08   98.69
  -1  -5  -2  221.38   53.29
   1   5   3    7.60   23.70
  -1   5  -3  -22.40   33.70
   1   5   3  116.29   66.99
   1   5   3   15.60   33.80
   1   5   3   22.70   23.30
  -1  -5  -3  -29.90   49.80
  -1  -5  -3   -7.50   11.60
   1   5   4   42.10   23.50
   1   5   4   50.89   30.30
   1   5   4   78.79   74.29
   1   5   4   37.20   23.10
  -1   5  -4   72.49   32.60
  -1  -5  -4   -5.00   58.99
   1  -5   4   98.29   39.50
  -1  -5  -4   49.99   14.00
  -1   5  -5  138.99   37.80
   1   5   5  133.39   29.70
   1   5   5  170.78   41.00
   1   5   5  149.99   30.80
   1   5   5  129.79   83.49
   1  -5   5  147.09   51.99
  -1  -5  -5  109.19   67.89
  -1  -5  -5  130.49   14.80
   1   5   6  187.38   31.40
   1   5   6  145.79   33.00
  -1   5  -6  167.78   33.80
   1   5   6  155.68  102.49
   1   5   6  180.68   36.90
  -1  -5  -6  170.78   13.50
  -1  -5  -6  125.39   79.09
  -1  -5  -6  162.88   19.40
   1  -5   6  174.78   13.00
   1   5   7  213.78   37.40
   1   5   7  290.87   35.50
   1   5   7  246.48   35.30
   1   5   7  199.28   44.00
  -1   5  -7  249.58   35.40
  -1  -5  -7  270.77   18.10
   1  -5   7  143.59   58.79
  -1  -5  -7  151.68   89.69
   1  -5   7  263.27   17.40
  -1  -5  -7  277.97   21.00
   1   5   8  -10.20   21.40
   1   5   8   12.50   18.40
  -1   5  -8   17.50   18.10
   1   5   8    4.70   19.30
   1   5   8   10.40   18.50
  -1  -5  -8   19.30    7.50
   1  -5   8   20.10    5.30
  -1  -5  -8   21.50    5.90
   1  -5   8   25.00   10.60
   1   5   9   82.29   21.70
   1   5   9   61.69   20.80
   1   5   9   75.29   28.70
   1  -5   9  106.29    9.70
  -1  -5  -9   99.19   11.10
  -1  -5  -9  108.99   10.60
   1  -5   9   99.79   12.50
   1   5  10  122.79   23.70
   1   5  10   86.99   19.30
   1  -5  10  102.39   10.70
   1  -5  10   71.19    8.80
  -1  -5 -10  113.69   10.20
  -1  -5 -10   92.69   10.60
   1   5  11   11.30   14.90
   1   5  11   -2.10   10.30
  -1   5 -11   -1.40    9.70
   1   5  11    0.30   12.20
  -1  -5 -11    1.50    4.50
  -1  -5 -11  -17.30   12.70
   1  -5  11    0.50    4.80
   1  -5  11   -7.10    5.40
  -1   6  10   53.99   12.00
   1   6 -10   62.09   13.80
   1  -6 -10   57.99    7.70
   1  -6 -10   77.79   15.80
  -1  -6  10   64.49    8.40
   1   6  -9   20.10   12.10
  -1   6   9   -7.40   11.20
  -1   6   9   20.50   13.60
  -1   6   9    1.50   11.20
  -1  -6   9   17.50    6.30
   1  -6  -9    4.30    5.50
  -1  -6   9    8.60    4.80
   1  -6  -9   13.90    5.70
   1   6  -8   -1.00   14.00
  -1   6   8    6.10   17.20
  -1   6   8    7.30   15.10
  -1   6   8   -3.80   14.60
  -1   6   8   -3.20   14.80
   1  -6  -8   -1.80    5.50
   1  -6  -8    1.90    6.60
  -1  -6   8    4.00    8.10
  -1  -6   8   -2.90    5.00
  -1   6   7  102.59   24.60
   1   6  -7  132.19   31.40
   1  -6  -7   79.69    9.60
   1  -6  -7   83.09   12.70
  -1   6   6   -8.90   20.80
  -1   6   6   -0.70   18.10
   1   6  -6   29.40   20.30
  -1   6   6    0.00   19.20
  -1   6   6    2.20   17.70
  -1  -6   6    5.30    6.30
   1  -6  -6    3.30    6.00
  -1   6   5  159.78   28.90
  -1   6   5  188.08   33.80
  -1   6   5  110.19   31.40
   1   6  -5  204.08   37.30
   1  -6  -5  158.78   14.00
  -1   6   4   78.89   24.70
   1   6  -4  119.39   57.39
  -1   6   4   63.79   26.00
  -1   6   4   22.50   21.30
   1  -6  -4   74.69   79.79
  -1  -6   4   97.79   60.09
  -1   6   3   55.19   28.70
  -1   6   3   35.80   23.40
   1   6  -3   22.60   29.70
  -1   6   3   -1.50   20.00
  -1   6   2  170.18   38.50
  -1   6   2  217.28   38.60
  -1   6   2  145.89   32.90
  -1   6   1   62.29   26.40
   1   6  -1   61.19   29.10
  -1   6   1   84.69   32.80
  -1  -6   1   10.20  234.98
  -1   6   0   66.89   33.70
   1   6   0   88.39   28.30
   1   6   1  350.76   43.10
   1   6   1  385.26   44.40
   1   6   2   35.00   25.20
   1   6   2   14.80   22.30
  -1   6  -3    5.80   27.70
   1   6   3   50.79   22.20
   1   6   3   36.30   26.00
   1   6   3   20.50   26.90
  -1  -6  -3   88.29   68.29
   1   6   4   19.50   24.80
   1   6   4   15.70   31.80
  -1   6  -4   31.40   23.70
  -1  -6  -4   19.70    6.70
  -1  -6  -4   76.29   76.29
   1   6   5  198.28   34.10
  -1   6  -5  172.58   32.40
   1   6   5  144.29   30.10
   1   6   5  191.08   31.00
  -1  -6  -5  193.08   14.20
  -1   6  -6   32.30   17.30
   1   6   6   19.10   18.50
   1   6   6   14.80   18.80
   1   6   6    2.80   17.60
  -1  -6  -6   35.40   10.30
   1  -6   6   40.40    8.00
  -1  -6  -6   43.30    8.10
   1   6   7    4.20   16.20
   1   6   7   -9.30   22.60
  -1   6  -7   35.40   29.00
   1   6   7   -6.50   14.80
   1  -6   7    6.70    5.70
  -1  -6  -7   15.20    7.50
   1   6   8  130.99   25.10
   1   6   8   99.29   23.70
   1  -6   8  142.39   11.20
  -1  -6  -8  154.68   11.90
  -1  -6  -8  135.79   12.50
   1  -6   8  125.89   16.80
   1   6   9   10.60   12.60
  -1   6  -9   38.10   11.70
   1  -6   9   43.40    6.90
  -1  -6  -9   45.10    8.30
  -1  -6  -9   33.10    6.60
  -1   7   7   -8.00    9.60
  -1   7   7   -5.20   13.10
   1  -7  -7    5.60    6.50
  -1   7   6    2.50   11.10
  -1   7   6   11.10   17.00
  -1   7   5   17.30   17.90
  -1   7   5   29.30   13.70
  -1   7   5   45.30   23.70
   1  -7  -5   20.10    7.50
  -1   7   4    9.30   15.20
  -1   7   4   28.00   23.70
  -1   7   4    3.60   16.70
  -1   7   3   56.79   26.30
  -1   7   3   29.50   18.80
   1   7  -2   24.90   36.10
   1   7  -1   10.00   25.20
   1   7   0    7.40   22.00
   1   7   1   18.60   23.90
   1   7   2   64.09   24.30
   1   7   3   11.70   20.40
   1   7   3   13.90   19.50
   1   7   4    8.70   17.90
   1   7   4   10.90   24.90
  -1  -7  -4   18.50    7.30
   1   7   5    7.50   19.70
   1   7   5    1.00   16.50
   1   7   5   33.00   17.00
  -1  -7  -5   54.29    9.10
   1   7   6   -2.20   14.80
   1   7   6   24.20   15.10
  -1   7  -6   17.90   19.60
   1   7   6   37.00   27.20
  -1  -7  -7   40.80    8.60
  -2   0  15    6.50   12.00
   2   0 -15   -7.90   16.70
   2   0 -14    6.40   17.50
  -2   0  14   23.60   13.60
  -2   0  13  114.49   28.90
   2   0 -13  122.99   25.70
   2   0 -12   -0.70   18.60
  -2   0  12   25.60   22.00
  -2   0  11  261.17   44.20
  -2   0  11  221.98   86.79
   2   0 -11  307.07   34.00
   2   0 -10   29.80   20.10
  -2   0  10   12.70   29.90
  -2   0  10    1.30   69.09
   2   0  -9  626.94   46.50
  -2   0   9  503.85   35.30
  -2   0   9  631.44   79.59
   2   0  -8  139.89   36.90
   2   0  -8  146.79   23.80
  -2   0   8  143.29   13.90
  -2   0   8  154.68   44.90
  -2   0   7  656.93   40.00
  -2   0   7  705.13   65.49
   2   0  -7  665.13   58.89
  -2   0   6  316.47   19.70
  -2   0   6  341.17   56.69
  -2   0   6  310.77   41.70
  -2   0   5  155.28   34.00
  -2   0   5  114.19   27.90
  -2   0   5  118.29    8.30
   2   0  -5  128.99   37.90
   2   0  -5  129.79   21.00
   2   0  -4  302.67   40.00
  -2   0   4  190.58   31.80
  -2   0   4  188.68   30.50
  -2   0   4  249.88   14.50
  -2   0   4  199.88   29.20
   2   0  -4  250.57   23.50
   2   0  -3    7.60    7.40
  -2   0   3    2.60    1.80
  -2   0   3  -10.50   18.10
  -2   0   3    5.70    8.80
   2   0  -3   -6.50   19.70
  -2   0   3   14.00   15.40
  -2   0   2 1426.56   92.39
  -2   0   2 1686.73   97.39
   2   0  -2 1492.75   91.99
  -2   0   2 1434.36   92.49
   2   0  -2 1531.15   93.09
   2   0  -1 2112.59  125.49
  -2   0   1 1947.61  125.59
  -2   0   1 2149.88  126.29
   2   0  -1 2232.18  125.99
  -2   0   1 2079.49  126.19
  -2   0   1 2181.18  122.49
  -2   0   0   34.00    3.00
   2   0   0   43.10    7.10
   2   0   0   28.70    9.10
  -2   0   0   42.40   14.30
   2   0   0   27.30    5.80
  -2   0  -1  220.68   15.80
   2   0   1  228.48   18.30
   2   0   1  219.98   17.30
   2   0   1  218.28   16.10
  -2   0  -1  202.98   25.50
  -2   0  -2  277.07   20.10
   2   0   2  262.37   20.60
   2   0   2  253.07   22.40
  -2   0  -2  250.47   32.90
  -2   0  -2  251.07   16.00
   2   0   3  229.38   22.70
   2   0   3  197.88   22.00
  -2   0  -3  182.28   12.90
   2   0   3  194.28   22.70
  -2   0  -3  220.08   18.80
  -2   0  -3  257.97   38.60
  -2   0  -4 2716.33  171.08
  -2   0  -4 2771.32  161.08
   2   0   4 2622.54  162.08
   2   0   4 2658.33  163.48
   2   0   4 2635.54  161.78
  -2   0  -4 2503.15  153.58
  -2   0  -5  968.40   66.59
   2   0   5 1017.00   72.59
   2   0   5  971.10   70.79
  -2   0  -5  889.41   91.49
   2   0   5  900.81   55.29
  -2   0  -5  934.91   55.99
   2   0   6 1737.23  146.49
  -2   0  -6 1788.92  119.79
  -2   0  -6 1950.80  106.79
   2   0   6 1773.12  105.89
   2   0   7   68.69   38.10
  -2   0  -7    7.60   30.00
   2   0   7   25.50    5.70
   2   0   7   35.60    7.90
   2   0   7  132.29   54.39
  -2   0  -8  261.37   39.50
  -2   0  -8  162.58   51.99
   2   0   8  279.97   19.00
   2   0   8  298.47   69.59
   2   0   8  256.37   20.20
  -2   0  -9  379.26   42.50
   2   0   9  187.08   71.99
   2   0   9  324.77   23.10
   2   0   9  373.66   43.60
   2   0  10    0.50   89.49
   2   0  10   47.40   24.70
  -2   0 -10  105.89   31.40
   2   0  11    8.80   21.50
   2   0  12    6.80   16.10
   2   0  13  160.38   28.00
   2   0  14    3.70    8.70
   2   1 -15    1.40   22.60
  -2   1  15   30.80   11.20
   2  -1 -15    8.00   13.80
   2   1 -14   21.20   19.70
  -2   1  14   16.30   13.40
   2  -1 -14    9.30   14.00
  -2  -1  14   10.40   15.70
  -2   1  13  138.39   25.80
   2   1 -13  129.09   29.10
   2   1 -12   29.10   23.90
   2   1 -12   19.50   23.20
  -2   1  12   25.30   19.00
  -2  -1  12   -2.50   24.90
   2  -1 -12   13.60   19.00
   2   1 -11   23.90   22.40
   2   1 -11   14.90   27.00
  -2   1  11  -69.99   82.09
  -2   1  11   12.70   24.10
  -2  -1  11   33.40   88.39
  -2  -1  11    1.60    6.70
  -2  -1  11   22.70   31.20
   2  -1 -11   -7.70   17.00
   2   1 -10  241.28   42.40
  -2   1  10  226.68   44.20
   2   1 -10  242.88   34.00
  -2  -1  10  257.67   54.09
  -2  -1  10  259.07   18.90
  -2  -1  10  257.87   18.50
   2  -1 -10  271.27   20.00
   2  -1 -10  312.37   31.40
  -2  -1  10  320.97   78.29
   2   1  -9   23.70   20.80
  -2   1   9   26.70   52.99
  -2  -1   9   35.90    7.10
   2  -1  -9   29.20   17.90
  -2  -1   9   27.90    6.00
   2  -1  -9   30.00    7.10
  -2  -1   9  -25.50   54.89
   2  -1  -9   32.00    7.90
   2   1  -8  608.64   66.99
   2   1  -8  551.04   44.30
  -2   1   8  518.65   66.59
  -2   1   8  517.35   33.00
   2  -1  -8  507.85   33.00
  -2  -1   8  526.75   33.10
   2  -1  -8  499.45   66.99
  -2  -1   8  526.85   31.90
  -2  -1   8  585.44   70.09
  -2  -1   8  430.46   76.99
  -2   1   7   75.49    8.00
  -2   1   7   67.79   39.50
   2   1  -7   51.09   26.10
  -2  -1   7  125.09   38.40
   2  -1  -7   80.59    7.40
   2  -1  -7   62.39   27.00
  -2  -1   7  101.09   40.80
  -2  -1   7   81.89    7.40
   2  -1  -7   85.79   55.49
  -2   1   6  744.63   43.00
   2   1  -6  859.51   58.49
  -2  -1   6  712.33   69.99
  -2  -1   6  676.33   61.19
   2  -1  -6  706.73   61.29
   2  -1  -6  681.53   69.49
   2  -1  -6  660.43   42.20
  -2  -1   6  694.13   42.20
  -2   1   5 1202.08   90.59
  -2   1   5 1233.28   75.39
   2   1  -5 1446.26   86.59
   2  -1  -5 1217.08   90.79
  -2  -1   5 1260.47   74.39
  -2  -1   5 1226.18   90.89
   2  -1  -5 1379.16   86.49
  -2  -1   5 1315.17   87.69
   2   1  -4  210.88   22.20
  -2   1   4  199.58   27.20
  -2   1   4  216.98   36.00
  -2   1   4  204.38   13.40
   2  -1  -4  207.48   23.80
  -2  -1   4  202.28   31.80
  -2  -1   4  228.68   26.50
  -2  -1   4  167.28   32.30
  -2  -1   4  216.88   12.70
   2  -1  -4  193.98   29.60
  -2   1   3 1022.20   56.89
  -2   1   3  991.20   67.29
  -2   1   3  977.00   65.19
   2   1  -3  961.50   62.49
  -2  -1   3  915.51   63.19
   2  -1  -3  934.91   63.89
  -2  -1   3  895.01   64.49
  -2  -1   3  962.60   67.89
   2  -1  -3  988.10   63.49
  -2  -1   3 1012.10   56.39
  -2   1   2  562.94   39.00
  -2   1   2  631.54   33.50
   2   1  -2  633.84   37.70
  -2   1   2  556.24   41.90
   2  -1  -2  520.65   39.00
   2  -1  -2  551.04   36.90
  -2  -1   2  521.65   38.60
  -2  -1   2  510.25   42.90
  -2  -1   2  542.25   38.30
   2   1  -1  542.55   39.40
  -2   1   1  577.94   33.20
  -2   1   1  580.64   36.90
   2   1  -1  597.04   35.40
  -2   1   1  460.55   39.10
  -2  -1   1  569.74   38.30
  -2  -1   1  568.24   33.20
   2  -1  -1  524.65   38.30
  -2  -1   1  577.54   35.80
   2  -1  -1  583.04   34.70
   2   1   0 2905.31  159.58
  -2   1   0 2704.33  154.48
  -2   1   0 2720.23  153.38
  -2  -1   0 2437.76  153.58
   2  -1   0 2226.28  157.68
   2  -1   0 2731.63  157.28
   2  -1   0 2720.03  154.18
  -2  -1   0 2772.22  157.88
  -2   1  -1   52.99    9.80
   2   1   1   55.09   14.20
  -2   1  -1   55.39    4.00
   2  -1   1   46.30   11.50
  -2  -1  -1   44.80    4.90
  -2  -1  -1   36.30   15.80
  -2   1  -2  878.81   56.29
   2   1   2  921.61   53.29
   2   1   2  872.01   58.69
  -2  -1  -2  849.91   52.09
   2  -1   2  851.71   56.99
   2  -1   2  802.02   56.19
  -2   1  -3  489.75   27.10
  -2   1  -3  508.25   35.20
   2   1   3  380.16   34.50
   2   1   3  417.26   37.90
   2  -1   3  492.45   38.70
  -2  -1  -3  498.45   32.00
   2  -1   3  441.86   37.80
  -2  -1  -3  462.75   46.20
  -2  -1  -3  421.56   28.10
   2   1   4  557.54   50.89
  -2   1  -4  658.63   36.50
  -2   1  -4  645.84   47.60
   2   1   4  622.74   51.19
  -2  -1  -4  603.04   61.69
   2  -1   4  610.64   51.19
  -2  -1  -4  672.63   44.70
  -2  -1  -4  586.54   37.90
   2  -1   4  625.54   47.50
   2   1   5 1426.96  102.79
   2   1   5 1578.54   99.29
  -2  -1  -5 1229.98   81.19
  -2  -1  -5 1409.16   89.79
   2  -1   5 1326.67   92.39
   2  -1   5 1430.16   96.49
  -2  -1  -5 1260.77  104.79
   2   1   6  137.29   36.10
  -2   1  -6   95.19   25.60
   2  -1   6  104.89   29.50
   2  -1   6   86.19    7.10
   2  -1   6  110.99   38.10
  -2  -1  -6   82.99   10.00
  -2  -1  -6   93.29   23.60
  -2  -1  -6  109.99   54.09
  -2  -1  -6   93.49    8.30
   2   1   7  496.85   62.29
  -2   1  -7  544.75   66.79
   2   1   7  527.85   53.49
  -2  -1  -7  666.63   66.29
  -2  -1  -7  614.44   36.20
   2  -1   7  659.73   64.09
  -2  -1  -7  590.84   37.80
   2  -1   7  606.84   35.50
  -2  -1  -7  605.94   36.80
   2  -1   7  626.64   69.79
  -2  -1  -7  638.94   99.59
   2  -1   7  590.64   37.00
   2   1   8  589.04   56.29
   2   1   8  701.73   78.19
   2  -1   8  531.75   81.29
  -2  -1  -8  652.93   39.10
   2  -1   8  573.84   82.79
   2  -1   8  630.24   37.70
   2  -1   8  632.84   39.10
   2   1   9  251.77   42.30
   2   1   9  165.28   36.80
   2  -1   9  254.17   17.90
   2  -1   9  239.48   16.10
  -2  -1  -9  211.58   19.00
   2  -1   9  125.59   77.09
   2   1  10   12.80   94.39
   2   1  10    8.10   19.90
   2   1  10   -0.40   27.60
   2  -1  10   16.60    7.60
   2  -1  10   19.80    7.40
   2  -1  10  -22.10  127.59
   2  -1  10   44.60   25.50
  -2  -1 -10   45.90   25.10
   2   1  11   -5.90   18.00
   2   1  11   22.80   24.10
  -2  -1 -11   11.30   23.60
   2  -1  11   14.90    7.00
   2  -1  11   26.80   21.60
   2   1  12  120.49   29.20
   2  -1  12  100.69   25.00
   2   1  13  114.69   29.10
   2  -1  13  121.99   31.70
   2   1  14    2.20    9.00
   2  -1  14   10.40   10.20
  -2   2  15   38.00   10.50
   2  -2 -15   14.60   11.90
   2  -2 -14   47.70   15.30
  -2   2  13   19.70   16.50
   2   2 -13   20.30   25.10
   2  -2 -13    3.10   14.50
  -2   2  12  108.09   28.30
   2   2 -12  150.28   31.70
  -2   2  12   79.69   26.30
   2  -2 -12  146.69   36.90
   2   2 -11  180.48   34.60
  -2   2  11  250.37  111.39
  -2   2  11  205.78   32.20
   2  -2 -11  191.78   28.00
  -2  -2  11  163.98  108.19
  -2  -2  11  182.18   14.60
   2  -2 -11  193.08   16.20
  -2  -2  11  180.38   15.00
   2   2 -10  220.78   38.50
  -2   2  10   57.19   73.99
   2   2 -10  164.38   35.00
  -2   2  10  123.89   33.10
  -2   2  10  165.58   29.60
  -2  -2  10  183.08   15.20
   2  -2 -10  169.58   15.00
   2  -2 -10  203.48   15.60
  -2  -2  10  115.69   78.79
  -2  -2  10  185.38   13.90
   2  -2 -10  233.38   26.00
  -2   2   9  303.07   73.69
  -2   2   9  300.17   43.10
  -2   2   9  346.47   44.50
  -2   2   9  264.27   51.29
   2   2  -9  341.97   40.70
   2  -2  -9  350.06   21.70
   2  -2  -9  333.17   22.30
   2  -2  -9  154.88   82.79
  -2  -2   9  340.67   21.10
  -2  -2   9  319.27   22.80
  -2  -2   9  375.86   84.99
  -2  -2   9  297.17   76.39
  -2   2   8   89.29   50.09
  -2   2   8   39.60   26.90
  -2   2   8   66.49    9.80
   2   2  -8   71.49   26.50
   2  -2  -8   60.99    7.90
   2  -2  -8   50.69   10.60
  -2  -2   8   67.79   52.09
  -2  -2   8   67.39    7.30
  -2  -2   8  107.79   49.30
   2  -2  -8   72.29   63.59
  -2  -2   8   79.39   10.90
  -2   2   7 1054.29   62.99
  -2   2   7 1106.29   94.19
  -2   2   7 1141.79   73.79
  -2   2   7  971.20   74.89
   2   2  -7 1117.79   92.49
   2   2  -7  933.51   74.09
   2  -2  -7  974.40   62.49
   2  -2  -7 1133.99   90.69
  -2  -2   7 1089.79   61.39
  -2  -2   7 1078.09   93.59
  -2  -2   7 1005.90   63.09
   2  -2  -7 1033.40   61.39
  -2  -2   7 1057.69   85.09
   2  -2  -7 1033.60   95.79
   2   2  -6  239.88   39.40
  -2   2   6  201.38   13.40
  -2   2   6  196.28   42.30
   2  -2  -6  203.28   41.50
   2  -2  -6  173.78   36.60
  -2  -2   6  160.78   12.00
  -2  -2   6  214.38   38.30
  -2  -2   6  201.48   41.50
   2  -2  -6  159.28   12.00
  -2   2   5  255.57   40.50
  -2  -2   5  201.18   30.00
   2  -2  -5  234.18   36.30
  -2  -2   5  223.38   14.30
  -2  -2   5  187.98   45.60
   2  -2  -5  246.88   33.30
   2  -2  -5  212.08   14.50
  -2   2   4 3145.19  187.78
  -2   2   4 2958.60  174.58
   2   2  -4 3094.79  183.58
  -2  -2   4 3038.60  173.28
  -2  -2   4 3032.00  181.78
   2  -2  -4 2918.71  182.18
   2  -2  -4 2772.52  183.28
  -2  -2   4 3055.99  190.98
   2   2  -3  223.58   24.40
  -2   2   3  204.58   14.10
  -2   2   3  187.58   39.90
  -2   2   3  179.38   27.20
  -2  -2   3  253.07   34.20
   2  -2  -3  217.18   22.30
  -2  -2   3  275.77   25.00
   2  -2  -3  243.28   25.80
  -2  -2   3  206.68   13.60
  -2  -2   3  176.68   31.70
  -2   2   2 1104.09   75.99
   2   2  -2 1125.69   71.89
  -2   2   2 1116.19   67.59
  -2  -2   2 1207.28   72.69
  -2  -2   2 1270.37   74.89
   2  -2  -2 1107.39   75.69
   2  -2  -2 1202.08   68.79
  -2  -2   2 1075.39   67.29
  -2   2   1 1723.43   98.69
   2   2  -1 1603.54  101.39
  -2   2   1 1622.64   90.99
   2   2  -1 1604.14   93.39
   2  -2  -1 1429.46   98.79
   2  -2  -1 1425.56   97.59
  -2  -2   1 1394.46   90.99
  -2  -2   1 1479.45   94.79
  -2  -2   1 1733.93   95.09
  -2   2   0  368.66   20.10
   2   2   0  356.86   31.80
  -2   2   0  346.57   28.20
  -2  -2   0  273.57   20.40
  -2  -2   0  319.77   28.70
   2  -2   0  285.97   29.60
   2  -2   0  326.67   29.70
  -2   2  -1 1060.99   59.39
   2   2   1 1081.29   71.09
  -2  -2  -1 1007.70   67.99
   2  -2   1  993.20   68.19
  -2  -2  -1  937.01   60.29
  -2   2  -2  315.57   18.60
   2   2   2  287.57   32.10
  -2   2  -2  284.17   28.40
  -2  -2  -2  319.17   35.70
   2  -2   2  325.97   34.50
   2  -2   2  295.17   24.10
   2   2   3  560.84   42.80
   2   2   3  703.23   53.79
  -2   2  -3  704.43   50.59
   2  -2   3  737.83   53.39
  -2  -2  -3  711.53   41.40
  -2  -2  -3  608.34   56.39
  -2  -2  -3  557.04   39.60
   2  -2   3  652.63   46.60
  -2   2  -4 2280.97  135.49
  -2  -2  -4 2248.58  126.89
  -2  -2  -4 1963.00  137.89
   2  -2   4 2251.37  131.99
  -2  -2  -4 2073.49  121.39
   2  -2   4 2082.59  136.59
  -2  -2  -4 1800.62  123.09
  -2   2  -5  129.99   29.80
   2   2   5  167.68   34.10
  -2  -2  -5  133.19   27.90
   2  -2   5  120.49    9.30
  -2  -2  -5  162.08   46.00
  -2  -2  -5  117.79    9.40
   2  -2   5  134.29   43.00
   2   2   6  525.85   44.80
   2   2   6  503.15   58.49
   2   2   6  560.04   47.90
  -2   2  -6  585.94   64.29
   2  -2   6  477.25   50.79
   2  -2   6  533.25   66.09
  -2  -2  -6  477.45   32.60
  -2  -2  -6  476.25   33.10
  -2  -2  -6  528.15   31.10
  -2  -2  -6  514.25   79.39
   2   2   7   36.10   45.60
   2   2   7   39.60   25.10
   2   2   7   41.60   23.10
  -2  -2  -7   48.80    8.40
  -2  -2  -7   52.59   10.10
  -2  -2  -7  107.59   68.79
   2  -2   7   53.79   10.20
   2  -2   7   50.19    5.70
   2  -2   7   24.70   35.00
  -2  -2  -7   40.60    7.20
   2  -2   7   54.39   52.79
   2   2   8   68.59   32.60
  -2   2  -8   16.60   34.50
   2   2   8   24.50   59.69
   2   2   8   67.99   26.50
   2   2   8   52.89   27.50
   2   2   8   46.50   28.00
  -2   2  -8   73.99   21.10
  -2  -2  -8   -2.90   88.49
  -2  -2  -8   47.50   13.40
   2  -2   8   17.20   69.09
  -2  -2  -8   57.59    8.50
   2  -2   8   45.90   44.00
   2  -2   8   58.99    6.40
  -2  -2  -8   32.70   12.60
   2   2   9   68.89   28.00
   2   2   9  139.79   34.10
   2   2   9   13.30   71.59
   2  -2   9  125.09   13.40
   2  -2   9  128.69   63.09
   2  -2   9  131.59   10.60
  -2  -2  -9  139.49   13.60
  -2  -2  -9  144.49   13.40
   2   2  10   -4.90   24.50
   2   2  10  -77.59  100.89
   2   2  10   29.10   24.10
   2   2  10    4.60   22.50
  -2   2 -10   12.30   29.70
   2  -2  10   15.80  117.89
   2  -2  10    2.20    8.50
  -2  -2 -10   20.80    7.80
   2  -2  10    4.90    6.10
  -2   2 -11   27.20   22.40
   2   2  11   57.79   20.40
   2   2  11   54.39   21.60
   2  -2  11   37.90   23.40
   2  -2  11   52.39    9.60
  -2  -2 -11    5.10   22.50
   2  -2  11   49.60    9.40
  -2   2 -12   29.40   32.80
   2   2  12   28.60   15.90
   2   2  12   16.80   16.60
  -2  -2 -12   13.40   18.20
   2  -2  12   30.80   16.90
   2  -2  12   24.70    6.50
   2   2  13  -10.90   14.60
   2   2  13   30.20   13.00
   2  -2  13   -0.10   12.50
   2   2  14   11.60    8.80
   2  -2  14   16.70    9.30
  -2   3  14   49.90   12.00
   2  -3 -14   25.00   11.80
  -2   3  13   76.99   19.00
   2   3 -13   82.89   19.70
  -2  -3  13   95.59    9.10
   2  -3 -13   66.99   18.50
   2   3 -12   41.60   28.30
  -2   3  12   15.90   15.50
   2   3 -12   46.90   17.90
  -2   3  12   34.90   19.20
  -2  -3  12   32.90    7.30
   2  -3 -12   49.99    9.90
  -2  -3  12   41.80    8.20
   2  -3 -12   41.20   15.30
  -2   3  11   11.00   19.70
  -2   3  11  -11.10   31.00
  -2   3  11  -12.80   18.80
   2   3 -11   24.50   18.40
   2   3 -11   22.60   47.10
   2  -3 -11   16.80   16.80
   2  -3 -11   18.80    6.90
  -2  -3  11   10.50    6.00
  -2  -3  11   12.60    5.80
   2  -3 -11   21.80    8.40
  -2   3  10  217.58   41.30
  -2   3  10  223.88  111.89
   2   3 -10  346.77   40.70
  -2   3  10  215.58   37.60
  -2   3  10  277.27   41.20
   2   3 -10  242.48   41.80
   2  -3 -10   65.39  121.79
   2  -3 -10  312.97   20.50
  -2  -3  10  251.87  117.79
   2  -3 -10  305.47   21.00
  -2  -3  10  331.67   19.90
  -2  -3  10  311.87   21.10
   2   3  -9   31.60   20.70
   2   3  -9   35.80   30.90
  -2   3   9   46.60   26.60
  -2   3   9   39.00   24.90
  -2   3   9   70.79   86.59
  -2   3   9   20.60   23.30
  -2  -3   9   31.80    5.60
  -2  -3   9   33.60    8.30
   2  -3  -9   62.99   74.29
  -2  -3   9  -36.10   63.59
   2  -3  -9   33.30    6.40
   2  -3  -9   44.40    8.60
  -2  -3   9   24.40   82.29
  -2   3   8  421.96   44.50
  -2   3   8  448.06   44.90
   2   3  -8  482.65   48.00
  -2   3   8  409.06   48.70
  -2   3   8  456.25   31.30
  -2   3   8  383.76   49.50
   2  -3  -8  464.05   30.70
   2  -3  -8  487.65   28.80
  -2  -3   8  559.44   74.09
  -2  -3   8  471.65   28.40
   2  -3  -8  560.44   90.09
  -2  -3   8  451.65   80.49
  -2   3   7  344.37   23.00
   2   3  -7  222.68   43.70
  -2   3   7  376.06   36.70
  -2   3   7  302.47   63.79
  -2   3   7  333.67   37.80
   2  -3  -7  305.77   23.10
  -2  -3   7  294.67   19.60
   2  -3  -7  320.87   63.19
  -2  -3   7  291.67   24.70
  -2  -3   7  298.17   65.29
   2  -3  -7  298.67   19.80
  -2  -3   7  321.17   53.79
  -2   3   6  330.27   37.40
  -2   3   6  348.37   24.00
   2   3  -6  273.47   67.79
  -2   3   6  356.66   39.30
  -2   3   6  319.97   58.69
   2   3  -6  305.17   41.90
  -2  -3   6  351.96   46.60
  -2  -3   6  381.76   21.90
   2  -3  -6  329.87   60.29
   2  -3  -6  341.27   54.49
  -2  -3   6  341.47   58.59
   2  -3  -6  364.46   22.10
  -2   3   5  374.66   50.49
   2   3  -5  380.66   47.10
  -2   3   5  406.96   40.30
  -2   3   5  376.36   26.80
   2   3  -5  395.46   59.49
   2  -3  -5  400.46   47.90
  -2  -3   5  460.65   25.30
  -2  -3   5  447.56   43.80
  -2  -3   5  441.96   57.49
   2  -3  -5  417.16   25.40
   2   3  -4  208.98   42.40
  -2   3   4  163.68   36.50
  -2   3   4  132.99   11.00
   2  -3  -4  152.48   27.40
  -2  -3   4  121.39   40.20
   2  -3  -4  144.19   31.10
  -2  -3   4   91.59   22.10
  -2   3   3  391.96   45.30
  -2   3   3  411.76   27.10
   2   3  -3  429.86   40.20
  -2  -3   3  387.56   53.19
   2  -3  -3  492.95   35.10
  -2  -3   3  420.36   26.60
  -2  -3   3  416.06   37.40
   2  -3  -3  467.35   44.60
  -2   3   2  163.58   35.30
   2   3  -2  174.98   26.20
  -2  -3   2  206.68   24.50
   2  -3  -2  239.78   34.30
  -2  -3   2  194.48   14.10
  -2  -3   2  219.48   43.30
  -2   3   1  217.98   34.90
  -2   3   1  221.68   16.10
  -2  -3   1  290.17   34.10
  -2  -3   1  255.07   26.30
   2  -3  -1  310.47   36.50
  -2  -3   1  245.48   17.00
  -2   3   0  420.86   43.00
  -2   3   0  446.36   26.30
  -2  -3   0  385.66   26.90
  -2  -3   0  469.45   38.20
   2  -3   0  386.06   44.10
  -2   3  -1  124.99    9.60
   2   3   1  128.29   29.90
  -2  -3  -1  180.38   30.00
  -2   3  -2  623.84   34.50
   2   3   2  566.54   52.99
  -2  -3  -2  493.05   36.00
   2  -3   2  557.14   58.09
  -2  -3  -2  642.44   53.19
  -2   3  -3  475.95   49.40
   2   3   3  428.46   50.09
  -2  -3  -3  482.15   50.29
   2  -3   3  500.85   57.59
  -2  -3  -3  344.57   27.20
   2  -3   3  401.06   35.70
  -2  -3  -3  418.06   24.90
   2   3   4   53.69   24.10
   2   3   4   72.49   35.20
  -2   3  -4  101.79   33.30
   2   3   4   88.49   24.20
  -2  -3  -4   14.70   34.80
  -2  -3  -4   65.09    6.60
   2  -3   4  110.29   46.30
   2   3   5  480.55   59.79
   2   3   5  512.85   42.70
   2   3   5  513.75   45.30
  -2   3  -5  516.15   70.59
   2  -3   5  468.55   70.49
  -2  -3  -5  492.95   29.10
  -2  -3  -5  395.76   31.60
  -2  -3  -5  493.75   69.79
   2  -3   5  497.45   29.10
  -2  -3  -5  473.65   32.50
   2   3   6   30.20   44.50
   2   3   6   53.69   22.80
   2   3   6   26.70   21.50
   2  -3   6   -6.70   71.79
  -2  -3  -6   30.40    5.50
  -2  -3  -6   32.50    8.80
  -2  -3  -6    4.60    8.60
   2  -3   6   30.00    5.00
  -2  -3  -6  -15.70   53.99
  -2   3  -7  338.27   46.70
   2   3   7  339.87   41.70
   2   3   7  324.97   51.79
   2   3   7  347.67   36.60
   2   3   7  291.57   75.09
  -2   3  -7  417.86   41.30
   2   3   7  342.87   47.20
   2  -3   7  461.85   58.09
   2  -3   7  370.06   22.70
  -2  -3  -7  478.35   85.99
  -2  -3  -7  405.76   25.10
   2  -3   7  420.36   27.90
  -2  -3  -7  326.87   27.30
  -2  -3  -7  319.47   27.00
   2   3   8  196.18   37.00
   2   3   8  151.08   37.50
  -2   3  -8  203.48   32.40
   2   3   8  145.39   31.40
   2   3   8  138.99   77.69
   2   3   8  132.99   27.80
  -2   3  -8  212.38   40.60
  -2  -3  -8  129.79   21.60
  -2  -3  -8  164.88   12.90
   2  -3   8  137.39   50.79
   2  -3   8  160.78   16.10
  -2  -3  -8   88.49   89.19
  -2  -3  -8  166.18   14.70
   2  -3   8  169.78   11.80
  -2   3  -9  133.79   32.90
   2   3   9  106.39   29.20
   2   3   9   82.49   99.69
   2   3   9  130.09   32.00
   2   3   9  174.58   53.49
   2  -3   9  129.59   14.40
  -2  -3  -9   92.19   34.40
  -2  -3  -9  144.59   13.10
   2  -3   9   95.39   64.09
   2  -3   9  146.89   10.90
  -2  -3  -9  141.89   12.80
   2   3  10   42.10   22.20
   2   3  10   90.39   23.30
  -2   3 -10  143.89   31.50
   2   3  10   46.70   21.60
  -2  -3 -10   72.39   12.50
   2  -3  10   29.80   90.89
   2  -3  10   81.99    8.80
  -2  -3 -10   84.49   11.10
   2  -3  10   81.09   11.20
   2   3  11   -3.90   15.90
   2   3  11    1.30   16.10
  -2   3 -11    4.20   16.00
   2   3  11  -16.20   19.40
   2  -3  11    0.50    5.60
   2  -3  11   12.00   20.30
   2  -3  11    6.60    5.90
  -2  -3 -11    1.00    6.40
   2   3  12   26.10   15.40
  -2   3 -12   29.90   16.30
   2   3  12   16.80   14.80
   2  -3  12   34.70    5.90
   2  -3  12   42.40   10.50
  -2  -3 -12    7.20   13.80
   2   3  13   36.00   11.70
  -2   3 -13   60.79   13.70
  -2  -3 -13   15.90   14.60
   2  -3  13   31.50   21.10
  -2   4  13   -3.40   10.50
   2   4 -13   17.10    8.70
  -2   4  13   25.70   10.60
  -2  -4  13   21.80    4.30
   2  -4 -13   24.10   13.70
   2   4 -12   30.20   14.40
  -2   4  12   32.40   14.60
  -2   4  12   20.80   14.40
  -2   4  12    0.70   18.90
   2  -4 -12   16.70   13.80
  -2  -4  12   13.70    4.90
   2  -4 -12   10.40    5.80
  -2  -4  12    4.70    5.60
   2   4 -11   61.39   18.00
  -2   4  11   62.59   18.40
  -2   4  11   29.40   19.70
  -2  -4  11   40.70    8.60
   2  -4 -11   30.70    6.80
   2  -4 -11   36.70    8.30
  -2  -4  11   41.60    7.50
   2  -4 -11   12.70   13.90
  -2   4  10    5.40   18.80
   2   4 -10    7.00   16.60
   2   4 -10  -19.00   29.20
  -2   4  10   -1.70   17.60
   2  -4 -10   15.60    6.50
  -2  -4  10   15.90    5.60
   2   4  -9  115.39   29.40
  -2   4   9  105.69   27.30
  -2   4   9   96.69   24.50
  -2   4   9   79.39   25.70
   2   4  -9  124.59   35.40
  -2  -4   9   83.09   12.60
  -2  -4   9   79.99    8.90
   2  -4  -9   76.79    9.60
   2  -4  -9   84.79   12.50
   2  -4  -9   21.40   88.29
  -2  -4   9   41.80   82.29
  -2   4   8   62.59   24.70
   2   4  -8   39.70   22.90
  -2   4   8   76.79   28.70
   2   4  -8   57.29   31.50
  -2   4   8   63.49   98.59
  -2   4   8   67.59   25.60
  -2   4   8   23.50   24.80
  -2  -4   8   -0.80   98.49
   2  -4  -8   73.19   12.70
  -2  -4   8  117.59   58.49
  -2  -4   8   65.39   14.20
   2  -4  -8   31.00   70.79
   2   4  -7  178.58   39.40
  -2   4   7  156.88   80.49
  -2   4   7  154.58   38.40
  -2   4   7  106.09   28.20
   2   4  -7  142.99   36.30
  -2   4   7  140.49   28.70
  -2   4   7  190.08   32.00
  -2  -4   7  200.48   86.19
  -2  -4   7   99.99   48.60
  -2  -4   7  132.69   10.90
   2  -4  -7  124.99   11.20
   2  -4  -7   96.79   64.59
   2  -4  -7  126.99   17.30
  -2   4   6  167.38   30.50
  -2   4   6  142.79   31.80
  -2   4   6  167.38   71.19
  -2   4   6  112.59   29.60
  -2   4   6  164.78   36.40
   2   4  -6  127.19   31.80
  -2   4   6  115.79   16.70
  -2  -4   6  160.78   11.50
  -2  -4   6   90.19   43.60
   2  -4  -6  144.69   50.59
   2  -4  -6  145.79   12.00
  -2  -4   6  123.19   71.79
  -2   4   5  186.68   34.30
  -2   4   5  178.78   35.00
  -2   4   5  101.69   54.39
   2   4  -5  176.58   37.90
  -2   4   5  158.08   30.20
  -2   4   5  189.78   15.60
  -2  -4   5  232.58   42.80
  -2  -4   5  162.88   67.09
   2  -4  -5  166.78   13.40
   2  -4  -5  182.58   43.30
  -2  -4   5  171.78   13.20
  -2   4   4  262.37   58.59
  -2   4   4  317.97   22.50
   2   4  -4  336.27   40.30
  -2   4   4  300.67   35.50
  -2   4   4  343.97   40.90
  -2  -4   4  323.47   40.60
  -2  -4   4  371.56   69.69
   2  -4  -4  257.37   44.40
  -2   4   3  191.68   14.90
   2   4  -3  217.68   34.10
  -2   4   3  119.19   45.70
  -2   4   3  131.79   33.90
  -2   4   3  165.98   29.60
   2  -4  -3  118.69   45.50
   2  -4  -3  212.48   32.30
  -2  -4   3  225.98   33.50
  -2  -4   3  231.78   58.19
  -2   4   2  186.08   39.50
  -2   4   2  188.68   15.00
   2   4  -2  186.18   35.60
  -2   4   2  202.88   34.10
  -2   4   2  257.47   52.89
  -2  -4   2  200.28   31.90
   2  -4  -2  140.89   44.60
  -2  -4   2  195.28   15.90
  -2   4   1   49.70   24.60
   2   4  -1   75.89   38.30
  -2   4   1   48.20    7.20
  -2   4   1   28.80   41.20
   2   4  -1   64.79   26.00
   2  -4  -1  113.19   43.00
  -2  -4   1   25.90    7.90
  -2  -4   1   37.80   23.20
   2   4   0   28.80   37.70
   2   4   0   14.60   21.50
  -2   4   0  -19.40   38.80
  -2  -4   0   12.60    7.20
   2  -4   0   31.40   44.20
  -2  -4   0   27.30   25.20
   2   4   1   89.89   41.10
  -2   4  -1   44.10    7.40
   2   4   1   51.09   21.20
   2   4   1   56.69   26.60
  -2  -4  -1   41.10    9.00
   2  -4   1   86.79   47.40
  -2  -4  -1   81.79   32.80
   2   4   2   33.40   21.90
   2   4   2   34.60   24.20
   2   4   2   25.80   38.80
  -2  -4  -2   24.30    8.80
   2  -4   2   74.89   56.79
  -2  -4  -2  -40.70   33.60
   2  -4   2   41.90   48.20
   2   4   3   20.60   41.90
   2   4   3   57.59   21.80
   2   4   3   46.80   23.50
  -2  -4  -3   69.29   41.50
  -2  -4  -3   76.49   11.10
   2  -4   3   83.99   24.20
   2   4   4  273.27   35.30
   2   4   4  259.07   57.89
   2   4   4  342.77   37.30
   2  -4   4  276.97   44.20
  -2  -4  -4  248.88   22.20
  -2  -4  -4  280.57   17.90
  -2  -4  -4  294.27   64.59
  -2   4  -5  213.18   44.60
   2   4   5  120.59   29.30
   2   4   5   90.89   59.39
   2   4   5  154.68   35.50
   2   4   5  157.98   29.10
  -2  -4  -5  176.28   12.00
  -2  -4  -5  202.28   60.29
  -2  -4  -5  154.68   16.50
   2   4   6  301.97   36.80
  -2   4  -6  299.47   40.20
   2   4   6  319.37   37.70
   2   4   6  237.98   44.10
  -2  -4  -6  270.37   18.60
   2  -4   6  279.57   18.30
  -2  -4  -6  395.96   90.39
  -2  -4  -6  293.17   22.10
  -2  -4  -6  235.78   24.20
   2   4   7   63.09   21.90
   2   4   7   85.39   32.30
  -2   4  -7  151.18   32.10
   2   4   7   61.19   26.60
   2   4   7   62.89   22.80
   2   4   7  150.08   89.09
  -2   4  -7   73.99   26.10
   2  -4   7   98.29    8.50
  -2  -4  -7   97.69   13.00
   2  -4   7   50.49   50.99
   2   4   8   25.30   22.00
   2   4   8   36.20   27.90
  -2   4  -8   58.09   20.80
   2   4   8   55.99   21.70
   2   4   8   79.89  179.88
  -2   4  -8   68.09   23.80
   2   4   8   42.90   21.50
  -2  -4  -8   -3.90   23.20
  -2  -4  -8   51.19   10.80
  -2  -4  -8   69.59  105.79
   2  -4   8   41.00    9.40
   2  -4   8   44.60    6.70
  -2  -4  -8   44.70    8.40
   2  -4   8    9.30   53.79
   2   4   9   21.50   30.10
  -2   4  -9   36.60   19.50
   2   4   9   41.90   33.50
   2   4   9   39.10   19.40
   2   4   9    8.90   23.00
  -2  -4  -9   35.20    7.40
   2  -4   9  130.69   72.69
  -2  -4  -9 -244.28  186.58
   2   4  10   14.80   18.60
   2   4  10   15.70   17.20
   2   4  10   14.40   15.10
  -2   4 -10   50.59   18.60
   2  -4  10   44.70    6.60
   2  -4  10   38.10    7.70
  -2  -4 -10   19.90    7.50
  -2  -4 -10   44.00    9.10
   2   4  11   57.29   19.80
   2   4  11   87.69   19.10
   2  -4  11   99.09    9.80
   2  -4  11   97.89    9.10
  -2  -4 -11   85.59   10.20
   2   4  12    3.80    9.40
   2   4  12    7.80   11.30
   2   4  12   15.40   18.40
  -2   4 -12   -3.00    9.80
   2  -4  12   13.40    7.10
  -2  -4 -12   -0.60   11.50
   2   5 -12   12.70    8.50
  -2   5  12   19.70   16.60
  -2   5  12   28.30   10.10
  -2   5  12   24.50    9.30
   2  -5 -12   45.60   12.80
  -2  -5  12   33.20    6.00
   2  -5 -12   16.50    5.40
  -2   5  11  106.99   22.60
   2  -5 -11   77.99    9.30
   2  -5 -11   62.79   11.30
  -2  -5  11   58.09    8.00
  -2  -5  11   85.89    8.60
   2  -5 -11   62.19   17.20
  -2   5  10    6.10   14.30
  -2   5  10    2.60   22.40
  -2  -5  10   27.40    6.30
   2  -5 -10   52.69    9.00
  -2   5   9    1.30   16.80
  -2   5   9    7.20   17.90
   2   5  -9   18.30   16.50
  -2   5   9    1.50   15.70
   2  -5  -9   23.50    5.90
   2  -5  -9   29.40    7.70
  -2  -5   9   25.20    8.10
   2   5  -8  208.78   43.90
  -2   5   8  147.29   33.40
   2   5  -8  217.48   32.10
  -2   5   8  179.38   32.40
  -2  -5   8  122.69   80.89
   2  -5  -8  169.88   24.40
   2  -5  -8  171.38   14.00
  -2  -5   8  195.58   13.60
   2  -5  -8   42.80   91.89
  -2  -5   8  176.08   18.00
   2   5  -7  191.68   35.10
  -2   5   7  191.18   32.70
  -2   5   7  198.98   33.20
  -2   5   7  169.68   30.00
  -2   5   7  194.68   37.80
   2   5  -7  191.08   44.20
  -2  -5   7  209.18   14.90
   2  -5  -7  182.68   72.69
  -2  -5   7   90.39   67.09
   2  -5  -7  202.08   19.50
   2  -5  -7  237.68   15.10
   2   5  -6  118.49   36.10
  -2   5   6  121.29   35.50
   2   5  -6  127.59   35.50
  -2   5   6  139.29   28.30
  -2   5   6  155.58   34.10
  -2   5   6  119.69  109.59
  -2   5   6  143.29   31.00
   2  -5  -6  121.19   11.60
  -2  -5   6  179.98  114.99
   2  -5  -6   50.99   66.89
  -2  -5   6  110.49   11.00
  -2  -5   6  172.58   58.59
  -2   5   5    6.70   22.50
  -2   5   5   30.80   97.49
  -2   5   5    6.20   21.30
  -2   5   5   -9.60   22.50
   2   5  -5    8.90   30.80
  -2   5   5    0.00   22.10
   2   5  -5    2.50   31.60
  -2  -5   5  -10.00    5.90
  -2  -5   5   38.10   96.19
   2  -5  -5   -1.30    6.80
  -2   5   4   49.10   91.09
  -2   5   4  147.99   32.30
  -2   5   4   54.69   23.60
  -2   5   4  180.48   40.00
  -2   5   4  105.59   27.60
   2   5  -4   78.89   30.80
  -2  -5   4   84.99   42.00
  -2  -5   4  211.78   97.49
   2  -5  -4  104.09   50.69
   2   5  -3  350.96   43.00
  -2   5   3  243.68   33.70
  -2   5   3  267.47   49.50
  -2   5   3  326.57   42.80
  -2   5   3  314.37   45.90
  -2  -5   3  171.08   83.19
  -2  -5   3  310.97   50.29
  -2   5   2   45.80   23.70
  -2   5   2   74.09   77.89
   2   5  -2   66.89   29.20
  -2   5   2   75.99   30.00
  -2   5   2   61.99   30.80
  -2  -5   2   30.70   34.50
  -2   5   1  174.98   38.30
   2   5  -1  225.18   34.20
  -2   5   1  189.78   44.80
  -2   5   1  243.58   51.19
  -2  -5   1  161.58   20.70
  -2  -5   1  148.29   38.80
  -2   5   0  464.45   44.80
   2   5   0  440.76   43.70
  -2  -5   0  459.15   56.39
  -2  -5   0  373.86   31.40
  -2   5  -1  184.98   60.39
   2   5   1   61.09   62.19
   2   5   1  131.59   29.60
  -2  -5  -1  159.48   44.60
  -2   5  -2  502.25   63.79
   2   5   2  694.33   96.49
   2   5   2  712.23   52.89
   2   5   2  651.43   54.29
  -2  -5  -2  525.55   41.10
  -2  -5  -2  612.24   75.09
   2   5   3  134.79   31.70
  -2   5  -3   85.29   35.00
   2   5   3  156.58   38.60
   2   5   3  159.58   74.69
   2   5   3  112.29   30.50
  -2  -5  -3  159.08   54.29
  -2  -5  -3   85.29   16.80
  -2  -5  -3  126.39   10.40
   2   5   4   96.69   25.50
   2   5   4  -56.19   72.59
   2   5   4   32.50   23.10
   2   5   4   75.29   32.10
  -2   5  -4   89.49   30.10
  -2  -5  -4   72.29   16.00
  -2  -5  -4   61.59    8.20
   2   5   5  184.18   33.70
   2   5   5  262.07   35.00
  -2   5  -5  298.97   52.19
   2   5   5  249.88   88.89
  -2  -5  -5  187.58   69.19
  -2  -5  -5  218.58   16.10
   2  -5   5  256.87   53.49
   2   5   6   58.79   24.20
   2   5   6   54.39   22.60
   2   5   6   78.19   26.00
  -2   5  -6  113.69   26.40
  -2  -5  -6  102.99   10.10
  -2  -5  -6  123.79   77.09
  -2  -5  -6  102.39   14.80
   2  -5   6  102.29    9.20
   2  -5   6  105.69   48.90
  -2   5  -7   57.09   20.40
  -2  -5  -7   94.69   10.10
  -2  -5  -7  181.78  101.39
   2  -5   7  102.89    8.80
   2  -5   7   99.19   55.29
  -2   5  -8  128.29   25.80
   2   5   8   75.49   21.60
   2   5   8   76.39   21.80
   2   5   8  122.39   26.80
   2  -5   8   88.39   15.20
  -2  -5  -8  122.89   10.10
  -2  -5  -8  120.29   12.00
   2  -5   8   79.19    9.20
   2   5   9    8.50   16.50
   2   5   9   17.80   16.50
   2   5   9    2.30   20.90
   2   5   9   16.70   17.40
  -2   5  -9    9.40   13.20
   2  -5   9   29.60    8.10
   2   5  10   37.60   15.20
   2   5  10   30.50   20.70
   2   5  10   58.79   16.00
   2  -5  10   63.29    7.60
   2  -5  10   48.50    9.10
  -2  -5 -10   66.89    8.20
   2   5  11    1.70   12.10
   2   5  11   -1.10    7.90
  -2   5 -11    4.30    8.10
   2  -5  11   13.70    4.30
  -2  -5 -11    4.10    9.60
  -2   6  10    3.60    9.00
   2   6 -10   19.90    9.90
   2  -6 -10   35.10    7.00
  -2  -6  10   38.40    7.10
   2   6  -9  149.79   20.60
  -2   6   9   80.09   20.60
  -2   6   9  101.09   23.20
   2  -6  -9  126.49   12.80
  -2  -6   9  108.49   12.80
   2  -6  -9   98.29   10.90
  -2  -6   9  118.79    9.70
  -2   6   8   12.40   15.50
  -2   6   8  -12.40   13.30
  -2   6   8   16.50   15.50
   2   6  -8    3.20   14.40
   2  -6  -8   11.90    5.60
  -2  -6   8   13.00    7.70
   2  -6  -8   12.70    7.10
  -2  -6   8   20.30    5.30
  -2   6   7   94.59   24.00
  -2   6   7  103.49   24.20
   2   6  -7   65.79   29.60
  -2   6   7   67.29   19.40
   2  -6  -7   87.99   13.60
   2  -6  -7   63.19   11.40
  -2   6   6   73.59   20.20
   2   6  -6   68.49   24.00
  -2   6   6  100.89   26.10
   2  -6  -6   87.99   10.00
  -2  -6   6   78.89    9.80
  -2   6   5    8.70   19.90
  -2   6   5  -11.60   19.00
  -2   6   5    5.30   21.50
  -2   6   5   -8.50   18.10
   2   6  -5   22.90   27.80
   2  -6  -5    6.60    6.90
  -2  -6   5    4.90    6.60
  -2   6   4  139.79   31.00
  -2   6   4  132.49   28.10
  -2   6   4   86.99   23.80
  -2  -6   4    8.80   64.69
  -2   6   3    4.50   19.90
  -2   6   3   -5.40   19.60
  -2   6   3   12.60   27.50
   2   6  -3   -4.90   23.60
  -2  -6   3   12.50   55.99
  -2   6   2   21.80   23.50
   2   6  -2   43.80   26.20
  -2   6   2   20.30   21.60
  -2   6   2  -10.70   39.20
  -2   6   1  150.78   32.70
   2   6  -1  183.58   35.30
  -2  -6   1   33.10   51.89
   2   6   0   94.59   26.50
  -2  -6   0   -2.50   55.79
   2   6   1   87.19   27.00
   2   6   1   21.60   47.50
  -2  -6  -1   52.29   58.29
   2   6   2  162.68   35.60
  -2   6  -2  170.48   47.10
   2   6   2  149.59   32.30
  -2  -6  -2  243.88   70.19
   2   6   3   32.30   24.40
   2   6   3    3.50   20.50
  -2   6  -3   20.60   25.80
  -2  -6  -3   11.80    5.90
  -2  -6  -3  -14.70   69.69
  -2   6  -4  137.69   35.00
  -2  -6  -4  140.69   11.90
   2   6   5   13.50   20.00
  -2   6  -5    9.10   18.70
   2   6   5    3.20   18.60
   2   6   5    4.70   20.10
  -2  -6  -5   19.20    6.20
  -2  -6  -5   32.70   10.80
   2   6   6   88.39   25.50
   2   6   6   97.29   27.30
  -2   6  -6   57.79   17.30
  -2  -6  -6   89.19   13.60
  -2  -6  -6  116.29   10.10
   2   6   7    4.00   15.00
  -2   6  -7   15.30   14.40
   2   6   7   -8.70   15.10
   2   6   7    0.80   15.80
   2  -6   7   17.50    5.70
  -2  -6  -7   26.50    6.50
  -2  -6  -7   17.50    5.90
  -2   6  -8   23.80   11.60
   2   6   8   11.40   13.40
   2   6   8    9.10   14.10
   2   6   8    2.30   14.10
   2  -6   8   45.20    7.90
   2  -6   8   42.10    8.60
  -2  -6  -8   45.10    7.90
   2   6   9    2.90   10.90
  -2   6  -9   16.20    8.70
   2   6   9    0.50   11.70
   2  -6   9   18.20    5.90
  -2  -6  -9   28.80    5.00
  -2   7   7   34.50   10.80
  -2   7   7    4.70   11.90
   2  -7  -7   24.30    8.00
  -2   7   6   46.60   17.60
  -2   7   6   47.10   13.10
  -2   7   5   -8.60   12.20
  -2   7   5   14.00   21.60
   2  -7  -5   16.70   11.00
   2   7  -4   27.10   28.60
  -2   7   4   -6.40   15.30
  -2   7   4    6.40   14.20
   2   7  -3   11.90   24.60
  -2   7   3   25.10   16.20
   2   7  -2  -24.10   22.30
   2   7  -1    5.50   21.30
   2   7   0   48.60   23.20
   2   7   1   25.30   20.90
   2   7   2   56.29   20.90
  -2  -7  -2   91.39   11.10
   2   7   3   23.70   25.10
   2   7   3   19.30   18.70
  -2  -7  -3   18.60    7.00
   2   7   4    5.00   21.90
   2   7   4  -12.50   13.20
  -2  -7  -4   11.40    6.60
   2   7   5   30.30   16.40
  -2   7  -5   35.00   20.40
   2   7   5   -0.50   16.10
  -2  -7  -5   31.80    8.30
  -2  -7  -5   25.90    6.20
   2   7   6   -2.30   14.40
   2   7   6    6.70   14.00
  -2  -7  -6    8.20    5.70
   3   0 -15   20.00   16.90
  -3   0  15   -7.10   15.40
  -3   0  14    9.30   18.40
   3   0 -14    0.60   15.80
  -3   0  13   13.40   18.90
   3   0 -13    7.70   16.30
  -3   0  12   41.60   22.80
  -3   0  11  263.37   43.00
  -3   0  11  -24.20   77.59
  -3   0  10   78.59  107.49
   3   0 -10   67.99   21.50
  -3   0  10   73.09   35.50
  -3   0   9  356.26   25.00
  -3   0   9  379.46   65.59
   3   0  -8  395.66   58.09
  -3   0   8  327.17   23.70
  -3   0   8  381.16   55.39
   3   0  -8  348.67   32.70
  -3   0   7   19.90   34.10
   3   0  -7   33.80   25.00
  -3   0   7   16.30    5.10
   3   0  -6 1163.58  107.19
   3   0  -6 1335.17   88.99
  -3   0   6 1278.57   74.69
   3   0  -5   88.59   18.00
  -3   0   5   64.99   27.20
  -3   0   5   67.89    5.80
  -3   0   5   71.89   33.40
  -3   0   4  312.97   36.90
   3   0  -4  252.87   25.90
  -3   0   4  247.68   15.70
  -3   0   4  272.57   33.80
   3   0  -4  191.88   40.50
  -3   0   4  225.38   36.20
  -3   0   3  878.51   63.29
   3   0  -3  885.61   63.29
   3   0  -3  880.51   59.79
  -3   0   3  965.70   53.29
  -3   0   3  854.51   62.59
  -3   0   3  963.20   62.89
  -3   0   2  715.23   48.80
   3   0  -2  663.23   46.10
  -3   0   2  632.54   47.30
   3   0  -2  735.93   48.40
  -3   0   2  659.13   49.10
  -3   0   2  726.93   40.70
  -3   0   1 7598.74  491.75
  -3   0   1 8831.82  492.15
   3   0  -1 7946.31  491.35
  -3   0   1 8275.87  487.65
   3   0  -1 9296.17  492.15
  -3   0   1 8813.62  492.85
   3   0   0 1879.51  106.89
  -3   0   0 1835.42  109.29
  -3   0   0 1828.42  102.69
   3   0   0 1764.72  104.99
   3   0   0 1532.45  105.79
   3   0   1  148.99   16.50
   3   0   1  158.08   15.20
  -3   0  -1  171.28   10.80
  -3   0  -1  160.38   30.30
   3   0   1  171.58   20.40
  -3   0  -2 1696.63  111.39
   3   0   2 1681.73  104.39
   3   0   2 1679.73  105.19
   3   0   2 1754.52  103.99
  -3   0  -2 1686.33  103.29
  -3   0  -2 1734.83   99.49
   3   0   3  218.78   26.70
   3   0   3  261.57   30.00
   3   0   3  231.68   27.20
  -3   0  -3  207.28   22.40
  -3   0  -3  311.57   47.10
  -3   0  -3  243.18   15.40
   3   0   4  324.17   43.10
   3   0   4  356.26   21.90
  -3   0  -4  350.26   31.40
  -3   0  -4  411.26   65.79
   3   0   4  379.46   37.80
   3   0   4  363.46   39.00
  -3   0  -4  358.06   22.60
  -3   0  -5  177.98   28.30
   3   0   5  143.29   35.40
   3   0   5  145.89   10.60
  -3   0  -5  161.58   11.70
   3   0   5  136.89   34.00
   3   0   6   17.70   37.70
  -3   0  -6   63.69   26.20
   3   0   6   12.80   44.50
  -3   0  -6   19.70    6.30
   3   0   6   32.30    5.20
   3   0   7  732.53   43.00
   3   0   7  744.33   44.20
   3   0   7  612.04   72.79
  -3   0  -7  732.53   82.19
   3   0   8  205.38   63.09
   3   0   8  123.59   13.30
   3   0   9   51.99   36.30
   3   0   9  -36.00   89.99
   3   0   9   41.90   26.20
   3   0   9   23.30    8.30
   3   0  10  585.64   63.29
   3   0  11    8.70   27.70
   3   0  11   72.89   22.60
   3   0  12   66.59   18.00
   3   0  13   -1.60   12.30
   3   0  14    3.90    7.50
  -3   1  15   98.49   19.20
   3   1 -15   81.19   22.60
   3   1 -14    5.90   18.00
  -3   1  14   -1.30   13.40
  -3  -1  14   13.50   17.20
   3  -1 -14   10.80   14.30
   3   1 -13    8.10   17.90
   3  -1 -13   26.60   16.90
   3   1 -12  637.74   53.19
  -3   1  12  580.54   51.69
   3  -1 -12  672.93   50.79
  -3   1  11   58.09   24.50
  -3   1  11  -92.79   83.59
   3   1 -11   42.90   25.60
   3   1 -11   30.40   20.50
  -3  -1  11  -26.70   79.19
  -3   1  10  621.94   61.99
   3   1 -10  744.53   60.09
  -3   1  10  561.84   95.19
   3   1 -10  666.53   53.99
   3  -1 -10  792.92   53.49
  -3  -1  10  700.93   42.40
  -3  -1  10  644.64   41.80
   3  -1 -10  696.73   43.00
   3   1  -9   30.90   20.40
  -3   1   9  -29.40   54.19
  -3  -1   9  -97.29   50.09
   3  -1  -9   14.30    7.20
   3  -1  -9   34.00   17.80
  -3  -1   9   18.90    5.60
   3  -1  -9   19.40    7.30
  -3   1   8  158.58   12.90
   3   1  -8  156.28   41.30
   3   1  -8  145.99   27.00
  -3   1   8  162.88   54.39
   3  -1  -8  121.99   43.20
   3  -1  -8  133.59   74.79
  -3  -1   8  164.28   11.70
   3  -1  -8  155.98   12.30
  -3  -1   8  157.68   13.50
  -3  -1   8  105.69   53.89
   3  -1  -8  177.38   25.80
   3  -1  -8  154.38   13.30
  -3  -1   8   91.29   46.90
   3   1  -7  694.13   61.29
  -3   1   7  644.34   65.99
   3   1  -7  572.24   48.90
   3  -1  -7  680.13   38.40
  -3  -1   7  651.43   39.40
  -3  -1   7  599.64   70.49
  -3  -1   7  526.15   62.99
   3  -1  -7  625.74   39.30
  -3  -1   7  695.13   38.30
   3  -1  -7  567.54   82.19
  -3   1   6  188.48   44.90
   3   1  -6  287.57   34.60
  -3   1   6  237.68   15.50
   3  -1  -6  219.58   15.00
  -3  -1   6  211.48   14.70
  -3  -1   6  279.67   43.20
   3  -1  -6  291.57   36.50
  -3  -1   6  229.08   14.90
  -3  -1   6  260.87   43.80
   3  -1  -6  207.88   43.60
  -3   1   5  536.25   52.49
   3   1  -5  666.63   47.80
  -3   1   5  591.24   35.70
   3  -1  -5  581.64   54.89
  -3  -1   5  613.04   35.00
  -3  -1   5  581.64   53.29
   3  -1  -5  579.54   49.00
  -3  -1   5  536.55   49.30
  -3   1   4  440.06   26.80
   3   1  -4  428.26   35.80
  -3   1   4  368.16   39.50
   3  -1  -4  454.75   38.40
  -3  -1   4  423.36   46.10
  -3  -1   4  462.35   40.20
  -3  -1   4  410.16   42.60
   3  -1  -4  447.06   41.20
  -3  -1   4  472.55   26.30
  -3   1   3 1325.97   74.89
   3   1  -3 1320.87   80.99
  -3   1   3 1195.78   87.09
  -3   1   3 1395.86   86.19
  -3  -1   3 1229.38   81.99
  -3  -1   3 1207.18   86.09
   3  -1  -3 1252.17   83.19
   3  -1  -3 1350.66   81.99
  -3  -1   3 1168.68   83.09
  -3  -1   3 1305.37   74.49
  -3   1   2 1981.30  108.09
  -3   1   2 1725.73  117.29
  -3   1   2 1935.61  113.39
   3   1  -2 2008.60  112.29
  -3  -1   2 1805.02  118.29
  -3  -1   2 1737.83  107.79
  -3  -1   2 1841.82  114.19
  -3  -1   2 1912.61  113.49
   3  -1  -2 1866.51  112.09
   3  -1  -2 1737.73  114.69
   3   1  -1 1435.76   84.89
  -3   1   1 1539.95   82.69
   3   1  -1 1392.56   89.49
  -3  -1   1 1410.56   85.49
   3  -1  -1 1315.57   88.89
   3  -1  -1 1438.06   86.69
  -3  -1   1 1369.16   82.69
  -3   1   0 1191.48   62.99
   3   1   0 1104.99   69.99
   3  -1   0 1085.69   65.99
   3  -1   0 1032.80   68.19
  -3  -1   0 1056.29   63.19
   3  -1   0  959.40   69.49
  -3   1  -1  779.22   43.90
   3   1   1  723.13   51.99
  -3  -1  -1  736.63   53.79
  -3  -1  -1  710.33   44.40
   3  -1   1  767.92   48.30
   3  -1   1  740.83   50.29
   3   1   2 1115.09   74.59
  -3   1  -2 1220.08   65.39
  -3   1  -2 1105.19   72.09
   3   1   2 1168.68   68.09
  -3  -1  -2 1131.79   77.59
  -3  -1  -2 1021.10   65.99
   3  -1   2 1077.29   73.59
   3  -1   2 1029.90   70.39
  -3  -1  -2 1135.19   66.79
   3  -1   2 1149.48   68.89
  -3   1  -3  895.61   61.59
   3   1   3  812.62   59.39
   3   1   3  863.91   69.39
  -3   1  -3  960.60   52.49
   3   1   3  844.72   63.99
   3  -1   3  825.52   59.99
   3  -1   3  935.31   60.49
  -3  -1  -3  941.61   56.69
  -3  -1  -3  995.40   72.79
  -3  -1  -3  860.51   53.39
  -3   1  -4  606.84   33.40
   3   1   4  527.35   51.59
  -3   1  -4  532.55   45.60
   3   1   4  517.55   48.60
   3  -1   4  568.64   46.30
  -3  -1  -4  589.94   62.39
   3  -1   4  629.44   48.10
  -3  -1  -4  589.44   41.00
   3  -1   4  518.95   33.10
  -3  -1  -4  525.35   34.50
   3   1   5  635.34   84.19
  -3   1  -5  669.83   55.59
  -3  -1  -5  577.74   75.79
   3  -1   5  659.93   37.30
  -3  -1  -5  661.13   49.70
  -3  -1  -5  591.44   38.80
  -3  -1  -5  583.74   37.50
   3  -1   5  659.43   55.09
   3  -1   5  626.84   58.69
  -3   1  -6   92.59   33.70
   3   1   6  110.49   38.40
   3  -1   6  249.48   50.29
  -3  -1  -6  123.99   65.29
  -3  -1  -6  161.28   12.20
   3  -1   6  127.59   35.70
  -3  -1  -6  183.88   41.30
  -3  -1  -6  168.88   14.10
   3  -1   6  160.18   15.20
   3  -1   6  156.28   11.20
  -3  -1  -6  160.68   13.60
   3   1   7  570.34   70.19
   3   1   7  443.76   53.09
   3   1   7  438.76   47.10
  -3   1  -7  488.25   74.69
   3  -1   7  516.35   29.60
  -3  -1  -7  464.95   32.20
  -3  -1  -7  497.25   31.00
   3  -1   7  489.25   31.30
   3  -1   7  525.75   71.99
   3  -1   7  496.15   65.29
  -3  -1  -7  475.65   31.00
   3   1   8  307.07   44.10
   3   1   8  221.68   39.90
  -3   1  -8  297.57   29.40
   3   1   8  180.08   63.59
   3   1   8  247.08   45.30
   3  -1   8  287.57   18.10
   3  -1   8  259.87   23.20
   3  -1   8  295.47   79.09
   3  -1   8  406.46   82.99
  -3  -1  -8  269.07   20.50
   3   1   9  263.07   45.60
   3   1   9  179.88   45.20
   3   1   9  269.87   41.20
   3   1   9   83.99   80.69
   3  -1   9  252.47   17.10
   3  -1   9  252.57   18.50
   3   1  10   10.40   21.80
   3   1  10 -131.59  105.99
   3  -1  10  -13.40   27.30
   3  -1  10    3.70    7.10
  -3  -1 -10   -2.60   26.30
   3   1  11  107.99   25.40
   3   1  11  128.19   30.00
   3  -1  11   86.29   22.00
   3  -1  11  108.39   16.20
   3   1  12   63.09   21.30
   3   1  12   34.50   17.00
   3  -1  12   61.09   18.50
   3   1  13   44.90   13.30
   3   1  13   46.20   17.00
   3  -1  13   18.50   11.70
   3   1  14    1.30    7.10
   3  -1  14    9.10    9.10
  -3   2  15    6.10    8.70
  -3  -2  15  -10.20   11.30
   3  -2 -15   -1.60    9.80
   3   2 -14   -3.80   29.40
  -3   2  14    5.00   11.70
   3  -2 -14    3.10   12.90
   3   2 -13   24.90   21.60
  -3   2  13   46.70   17.40
   3  -2 -13   74.99   18.20
   3   2 -12   58.49   21.00
  -3   2  12   45.90   21.00
   3  -2 -12   38.70   30.40
  -3   2  11  221.28   36.90
  -3   2  11  266.07  100.89
   3   2 -11  255.47   36.90
   3  -2 -11  224.98   18.20
  -3  -2  11  216.68   17.40
  -3  -2  11  235.38   17.30
  -3  -2  11    9.40   93.79
   3  -2 -11  295.07   30.30
  -3   2  10   14.60   22.40
   3   2 -10   -0.20   21.80
   3   2 -10   38.70   24.40
  -3   2  10   10.60   33.20
  -3   2  10   82.99   78.59
  -3  -2  10   37.00    7.30
  -3  -2  10   41.80    6.50
  -3  -2  10   86.39   78.79
   3  -2 -10   35.90    8.00
   3  -2 -10   50.39   18.60
   3  -2 -10   52.39   10.00
  -3   2   9  237.08   55.19
   3   2  -9  394.66   45.40
  -3   2   9  321.07   45.50
  -3   2   9  305.17   24.20
  -3   2   9  176.08   74.69
   3   2  -9  321.17   37.10
  -3   2   9  258.17   43.90
   3  -2  -9  342.87   21.60
  -3  -2   9  393.06   87.59
   3  -2  -9  242.48   95.69
   3  -2  -9  338.77   22.80
  -3  -2   9  360.36   22.90
  -3  -2   9  333.57   21.20
   3   2  -8  137.79   29.40
  -3   2   8  105.59   53.69
  -3   2   8  108.09   12.00
  -3   2   8  128.19   31.80
   3  -2  -8   99.39   11.50
  -3  -2   8  214.28   52.29
   3  -2  -8   78.39   10.30
   3  -2  -8    3.50   61.99
  -3  -2   8   96.39    8.90
  -3  -2   8  117.19   12.20
  -3  -2   8  129.29   54.99
  -3   2   7  351.76   40.50
   3   2  -7  412.96   63.99
  -3   2   7  357.46   24.00
  -3   2   7  350.06   37.20
  -3   2   7  328.27   61.29
   3   2  -7  357.76   38.30
   3  -2  -7  505.35   66.99
  -3  -2   7  370.96   60.99
   3  -2  -7  385.76   66.19
   3  -2  -7  378.86   22.70
  -3  -2   7  347.77   25.10
  -3  -2   7  374.16   22.60
  -3  -2   7  380.76   53.59
   3  -2  -7  339.77   24.80
   3   2  -6  412.76   54.39
  -3   2   6  412.96   28.90
  -3   2   6  406.06   56.59
  -3  -2   6  502.15   59.39
   3  -2  -6  461.15   27.80
   3  -2  -6  460.05   53.09
   3  -2  -6  456.45   53.09
  -3  -2   6  498.55   50.19
  -3  -2   6  500.35   27.80
  -3   2   5   81.39    8.00
  -3   2   5  130.39   33.40
   3   2  -5   68.19   25.70
  -3  -2   5   77.49   25.00
  -3  -2   5  137.89   34.50
   3  -2  -5   89.99   27.40
  -3  -2   5   87.59    7.50
   3  -2  -5   77.79    7.50
   3  -2  -5   88.89   25.00
  -3   2   4  122.19   28.60
   3  -2  -4  153.98   28.10
   3  -2  -4  104.09   23.50
  -3  -2   4  103.69   24.00
  -3  -2   4  134.99    9.10
  -3  -2   4  112.89    9.40
  -3  -2   4  177.98   34.80
  -3   2   3  128.19   26.60
  -3   2   3  116.89    9.10
   3   2  -3  110.69   20.80
  -3  -2   3  102.09   26.20
   3  -2  -3  139.89   24.10
  -3  -2   3  139.29   23.70
  -3  -2   3  120.29    8.80
   3  -2  -3  130.99   18.60
  -3  -2   3  131.69   31.70
   3   2  -2  214.78   19.70
  -3   2   2  213.48   27.00
  -3   2   2  212.48   13.20
  -3  -2   2  187.48   13.30
   3  -2  -2  211.88   18.70
  -3  -2   2  145.19   26.10
  -3  -2   2  172.58   25.80
   3  -2  -2  199.18   26.50
  -3   2   1 1713.03  107.89
  -3   2   1 1714.93  102.09
   3   2  -1 1781.42  113.69
  -3  -2   1 1724.83  102.29
  -3  -2   1 1814.42  109.39
   3  -2  -1 1806.12  106.39
   3  -2  -1 1590.84  111.49
   3  -2  -1 1837.42  103.49
   3   2   0  -23.10   16.50
  -3   2   0    5.90    2.80
  -3   2   0   -5.60   13.50
  -3  -2   0   22.60   17.80
   3  -2   0    5.70   14.40
   3  -2   0    9.10    7.00
  -3  -2   0   14.00    3.90
   3   2   1  327.57   33.60
  -3   2  -1  347.17   19.10
  -3  -2  -1  260.07   19.70
  -3  -2  -1  274.67   34.40
   3  -2   1  318.57   38.30
   3  -2   1  293.97   31.10
   3   2   2 1131.99   79.69
  -3   2  -2 1126.59   75.19
  -3   2  -2 1155.78   64.99
  -3  -2  -2  991.40   66.09
  -3  -2  -2 1168.98   80.29
  -3   2  -3 1198.18   66.39
  -3   2  -3 1230.68   80.19
   3   2   3 1144.09   82.09
  -3  -2  -3 1061.59   67.99
  -3  -2  -3 1123.59   86.09
   3  -2   3 1080.69   78.99
  -3  -2  -3 1147.79   66.09
   3  -2   3 1089.89   74.29
  -3   2  -4  747.73   59.19
   3   2   4  610.44   58.39
   3  -2   4  589.54   51.49
  -3  -2  -4  636.74   41.60
   3  -2   4  649.54   39.60
  -3  -2  -4  850.11   70.79
   3  -2   4  692.73   61.49
  -3  -2  -4  683.83   39.50
   3   2   5  142.99   41.80
   3   2   5  134.29   28.00
  -3   2  -5  132.79   34.00
  -3  -2  -5  135.29   10.10
  -3  -2  -5  114.39   12.20
  -3  -2  -5  171.48   50.79
  -3  -2  -5  129.29   13.50
   3  -2   5  186.48   45.50
   3  -2   5  144.69    9.90
   3   2   6  256.27   33.60
   3   2   6  282.27   38.40
   3   2   6  338.07   54.59
  -3   2  -6  250.87   63.39
  -3  -2  -6  296.67   22.00
   3  -2   6  298.57   24.30
  -3  -2  -6  175.68   73.09
  -3  -2  -6  277.47   18.90
  -3  -2  -6  270.17   20.50
   3  -2   6  310.87   18.30
   3  -2   6  322.37   43.70
   3   2   7  172.48   34.20
   3   2   7  167.08   55.59
   3   2   7  129.09   27.90
  -3  -2  -7  113.59   10.40
  -3  -2  -7  102.59   12.30
  -3  -2  -7  115.69   15.30
   3  -2   7   52.39   38.80
   3  -2   7  115.69   14.20
   3  -2   7  121.89    9.00
  -3  -2  -7   44.40   80.49
   3   2   8   37.80   22.70
   3   2   8   91.19   29.20
  -3   2  -8   34.40   18.90
   3   2   8   47.80   29.30
   3   2   8   53.99   28.50
  -3   2  -8   48.70   32.30
  -3  -2  -8   45.70   13.60
  -3  -2  -8   24.90    7.10
   3  -2   8   46.50    8.40
   3  -2   8   38.10    6.20
   3  -2   8    5.90   54.09
   3   2   9  186.88   94.39
   3   2   9  141.49   34.30
   3   2   9  194.78   39.50
   3   2   9  206.18   41.60
   3  -2   9  168.18   12.80
   3  -2   9  220.28   77.79
   3  -2   9  160.08   15.00
  -3  -2  -9  178.58   15.60
   3   2  10   20.90   23.00
   3   2  10   -2.10   19.70
   3   2  10   13.80   24.60
  -3   2 -10   -2.90   23.10
   3  -2  10   10.00    6.70
   3  -2  10    8.90    6.00
  -3  -2 -10   -9.80    9.00
   3   2  11   82.79   21.90
   3   2  11  135.19   29.70
   3  -2  11  116.99   11.80
   3  -2  11  138.59   29.90
   3  -2  11   97.19   12.60
   3   2  12  102.29   22.80
   3  -2  12   94.89   10.60
   3   2  13   -0.60   10.50
   3   2  13   10.60   12.20
   3  -2  13   18.30   11.70
  -3   3  14    1.90    8.20
   3  -3 -14    0.60   12.00
  -3   3  13   63.49   18.40
   3   3 -13   37.40   22.10
  -3   3  13   81.09   17.30
  -3  -3  13   43.70    7.70
   3  -3 -13   14.10   12.50
   3   3 -12  128.09   32.10
  -3   3  12  115.39   29.30
  -3   3  12  227.28   29.90
   3  -3 -12  211.18   15.10
  -3  -3  12  159.78   14.80
   3  -3 -12  165.28   23.90
  -3  -3  12  188.58   14.00
   3   3 -11   10.90   27.30
  -3   3  11   13.30   20.20
   3   3 -11    8.10   18.00
  -3   3  11   -3.10   19.60
   3  -3 -11   -3.40    7.70
   3  -3 -11    5.40   16.60
  -3  -3  11    8.30    5.70
   3  -3 -11   17.20    7.10
  -3  -3  11   -1.90    5.70
   3   3 -10   27.10   26.30
   3   3 -10   95.09   24.40
  -3   3  10   17.00   23.80
  -3   3  10   66.99   25.40
  -3   3  10   75.49   24.40
  -3   3  10   64.09  106.79
   3  -3 -10   69.39   11.10
  -3  -3  10   63.59    8.40
   3  -3 -10  183.58  117.59
  -3  -3  10   59.59   10.40
   3  -3 -10   76.29   10.30
  -3  -3  10  -30.80   95.79
  -3   3   9   11.20   23.20
   3   3  -9   23.90   23.10
  -3   3   9   -2.40   22.80
   3   3  -9   30.90   27.70
  -3   3   9  -35.90   82.39
  -3   3   9   58.19   26.60
  -3  -3   9   20.20    7.20
   3  -3  -9   17.20    5.80
  -3  -3   9   14.60    5.20
   3  -3  -9   57.79   88.49
  -3  -3   9  -84.79   66.09
   3  -3  -9   14.20    7.10
  -3  -3   9  -74.39   79.39
  -3   3   8  274.47   21.60
  -3   3   8  495.75  135.39
   3   3  -8  222.68   37.40
   3   3  -8  283.87   39.40
  -3   3   8  241.68   39.30
  -3   3   8  283.57   34.50
  -3   3   8  311.07   47.00
  -3   3   8  286.47   38.60
   3  -3  -8  385.16   75.79
   3  -3  -8  271.87   20.50
  -3  -3   8  257.07   17.60
   3  -3  -8  268.77   17.90
  -3  -3   8  169.18   56.29
  -3  -3   8  251.87   20.50
  -3   3   7  178.28   16.30
   3   3  -7  160.28   38.70
  -3   3   7  163.38   31.40
  -3   3   7  265.77   68.49
  -3   3   7  156.78   34.10
  -3  -3   7  217.08   14.00
  -3  -3   7   93.89   55.79
  -3  -3   7  212.38   48.70
   3  -3  -7  207.08   14.20
   3  -3  -7  277.27   58.99
  -3  -3   7  225.88   19.40
   3  -3  -7  217.78   18.50
  -3   3   6   -5.50   21.70
  -3   3   6   25.60    7.20
  -3   3   6   85.49   49.20
   3   3  -6   48.60   26.00
  -3   3   6   39.50   23.70
   3   3  -6   22.30   47.00
  -3  -3   6    9.00   43.90
   3  -3  -6   -4.80   35.80
  -3  -3   6   33.10    6.10
  -3  -3   6  -14.20   29.60
   3  -3  -6   28.20   43.60
   3  -3  -6   22.70    4.90
   3   3  -5  775.52   59.49
  -3   3   5  831.72   60.29
  -3   3   5  762.72   56.99
   3   3  -5  777.42   74.79
  -3   3   5  771.42   71.39
  -3   3   5  783.82   46.70
  -3  -3   5  733.13   61.29
   3  -3  -5  752.32   78.59
   3  -3  -5  684.73   63.09
   3  -3  -5  709.23   44.60
  -3  -3   5  737.63   44.50
  -3  -3   5  687.53   74.59
  -3   3   4   28.20   21.40
   3   3  -4   30.50   24.90
  -3   3   4   34.40    6.20
   3   3  -4    9.60   24.80
  -3   3   4   61.49   33.90
  -3  -3   4   34.80    6.50
   3  -3  -4   41.70   30.10
   3  -3  -4   -1.70   35.70
  -3  -3   4   -0.80   32.20
  -3   3   3  827.42   51.29
   3   3  -3  827.22   62.79
  -3   3   3  875.21   70.59
  -3  -3   3  886.21   50.99
  -3  -3   3  829.32   61.69
   3  -3  -3  851.31   70.89
   3  -3  -3  827.42   56.99
  -3  -3   3  835.32   74.79
   3   3  -2 1570.14   93.99
  -3   3   2 1473.75   87.99
  -3   3   2 1595.84  103.79
  -3  -3   2 1482.65   87.89
   3  -3  -2 1435.06   89.89
  -3  -3   2 1477.85   96.29
   3  -3  -2 1386.86  103.29
   3   3  -1  -29.10   22.60
  -3   3   1    7.00   27.00
  -3  -3   1   -3.00    4.80
  -3  -3   1   25.60   20.10
   3  -3  -1    4.90   23.00
  -3   3   0  766.62   60.69
   3   3   0  742.53   64.09
  -3   3   0  814.02   47.00
  -3  -3   0  823.62   60.59
   3  -3   0  723.43   66.59
   3   3   1  134.79   31.60
  -3   3  -1  105.69    8.20
  -3  -3  -1   83.89   27.50
   3  -3   1   94.89   28.20
   3  -3   1   88.09   37.30
  -3  -3  -1   75.59    9.30
  -3   3  -2  278.17   17.80
   3   3   2  271.97   40.30
  -3  -3  -2  264.67   19.70
  -3  -3  -2  247.18   42.90
   3  -3   2  303.57   55.69
   3   3   3  771.62   57.09
   3   3   3  704.83   58.39
   3   3   3  834.42   71.69
  -3  -3  -3  725.23   47.80
  -3  -3  -3  797.22   44.90
   3   3   4  191.28   47.80
   3   3   4  104.09   28.80
  -3   3  -4  160.78   41.00
   3   3   4  204.08   32.20
  -3  -3  -4  244.58   55.29
   3  -3   4  133.79   12.20
  -3  -3  -4  131.49   13.30
  -3  -3  -4  146.59   10.20
   3   3   5   73.69   42.50
   3   3   5  112.39   25.50
   3   3   5   99.59   24.80
  -3  -3  -5   85.79   11.80
  -3  -3  -5   80.99    7.80
  -3  -3  -5   73.99   12.80
   3  -3   5   88.99   28.40
  -3  -3  -5   57.29   48.40
   3  -3   5   91.99    8.40
   3   3   6  114.59   30.80
  -3   3  -6   92.49   32.70
   3   3   6  115.09   27.60
   3   3   6  138.29   57.19
   3   3   6  173.18   37.60
  -3  -3  -6  218.68   67.99
   3  -3   6  124.19   10.10
  -3  -3  -6  130.09   13.80
   3  -3   6  115.39   34.90
  -3  -3  -6  150.78   15.50
  -3  -3  -6  142.09   10.90
   3   3   7  163.28   31.90
  -3   3  -7  163.38   42.00
   3   3   7  100.09   27.50
   3   3   7    2.00   65.69
   3   3   7  229.98   52.09
  -3   3  -7  175.68   28.40
   3   3   7  158.38   29.90
  -3  -3  -7  138.89   13.90
  -3  -3  -7  106.49   17.00
   3  -3   7  157.18   10.80
   3  -3   7  151.48   17.50
  -3  -3  -7  140.89   11.80
   3  -3   7  178.78   46.30
  -3  -3  -7   73.29   79.59
  -3   3  -8  147.79   28.60
   3   3   8  129.79   28.80
   3   3   8    7.80   82.59
   3   3   8  116.59   32.90
  -3   3  -8  169.58   38.00
   3   3   8  154.48   35.10
  -3  -3  -8  162.18   13.00
  -3  -3  -8  166.08   14.20
   3  -3   8  161.58   12.60
   3  -3   8  176.78   15.60
  -3  -3  -8  160.88   22.60
  -3  -3  -8  178.88  111.99
   3   3   9   32.10   22.40
   3   3   9    2.40   20.40
   3   3   9   23.30   23.20
   3   3   9    8.30   23.20
  -3   3  -9   46.10   24.70
   3  -3   9    9.10   73.19
  -3  -3  -9   35.90    7.30
  -3  -3  -9   22.80    7.70
   3  -3   9   36.80    5.90
   3  -3   9   41.50    8.20
   3   3  10  127.69   25.70
   3  -3  10  118.99   10.70
   3   3  11    2.30   19.50
   3   3  11   79.89   18.10
   3   3  11   65.69   18.00
  -3  -3 -11   45.60   17.60
   3  -3  11   28.90   22.30
   3  -3  11   79.59    9.80
   3   3  12    5.60   13.10
   3   3  12   15.30   12.90
  -3   3 -12   29.60   13.90
   3  -3  12   22.10   13.90
   3  -3  12   35.00    7.20
   3   3  13   37.50   10.90
   3   3  13    3.30    8.70
  -3   4  13    4.30    9.20
  -3   4  13   25.30   12.20
   3  -4 -13   24.60   12.80
  -3  -4  13   22.80    4.40
  -3   4  12   11.80   12.10
  -3   4  12   10.10   32.50
   3   4 -12   -5.40   10.80
  -3   4  12   12.10   13.70
   3  -4 -12   13.00   13.40
  -3  -4  12   22.40    4.90
  -3  -4  12    8.30    6.20
  -3   4  11  152.48   27.50
   3   4 -11  177.48   27.60
  -3   4  11  168.88   29.60
  -3  -4  11  159.28   13.30
   3  -4 -11  178.18   14.40
   3  -4 -11  159.78   13.80
   3  -4 -11  171.88   24.20
  -3  -4  11  132.89   12.10
  -3   4  10   27.10   19.60
  -3   4  10   44.20   35.00
  -3   4  10   26.00   19.20
   3   4 -10   26.40   17.60
   3   4 -10   27.20   29.20
  -3  -4  10   20.80    5.70
   3  -4 -10   19.50    7.00
   3   4  -9  125.09   37.00
  -3   4   9  159.78   31.00
  -3   4   9  148.19   32.40
   3   4  -9  234.88   34.80
  -3   4   9  161.48   35.90
  -3  -4   9  195.58   16.20
   3  -4  -9  202.58   14.00
  -3  -4   9  170.08   13.50
   3  -4  -9  191.78   16.30
  -3  -4   9   38.60   76.39
   3  -4  -9   50.99   89.69
  -3   4   8  116.69  110.09
  -3   4   8  195.78   32.60
  -3   4   8  189.28   50.39
  -3   4   8  260.37   49.30
  -3   4   8  253.97   36.50
   3   4  -8  141.79   38.80
   3  -4  -8  186.18   17.40
   3  -4  -8  197.88   18.30
  -3  -4   8  178.88   17.50
  -3  -4   8  116.09   63.39
  -3  -4   8  108.29   95.69
   3  -4  -8   92.99   76.69
  -3   4   7  148.89   87.39
   3   4  -7  189.28   37.90
  -3   4   7  160.78   33.50
  -3   4   7  165.18   17.20
  -3   4   7  180.78   33.20
  -3   4   7  138.59   31.70
  -3   4   7  155.18   37.60
   3   4  -7  143.89   36.10
   3  -4  -7  187.68   13.00
   3  -4  -7  123.99   63.19
   3  -4  -7  171.98   18.40
  -3  -4   7   96.09   81.39
  -3  -4   7  156.58   52.99
  -3  -4   7  170.48   19.90
  -3  -4   7  167.98   12.60
  -3   4   6  357.86   43.80
  -3   4   6  378.66   89.39
  -3   4   6  350.16   40.70
   3   4  -6  311.17   43.10
   3   4  -6  344.77   45.60
  -3   4   6  287.47   40.40
  -3   4   6  293.87   24.20
  -3   4   6  313.17   36.90
   3  -4  -6  323.97   21.30
   3  -4  -6  342.27   66.29
  -3  -4   6  349.47   21.20
  -3  -4   6  383.86   59.09
   3   4  -5    6.80   24.30
  -3   4   5   46.90   23.10
  -3   4   5   -7.80   61.29
  -3   4   5   42.80   27.70
  -3   4   5   38.10    9.70
  -3   4   5   43.40   27.70
  -3   4   5   54.89   27.10
  -3  -4   5   37.80    6.20
   3  -4  -5   53.69    7.20
   3  -4  -5  -27.60   34.90
  -3  -4   5   -2.60   31.60
  -3  -4   5   73.49   60.19
  -3   4   4  105.39   30.90
   3   4  -4  122.59   32.80
  -3   4   4   83.39   10.70
  -3   4   4   16.90   50.19
  -3   4   4  104.29   26.00
  -3  -4   4   27.20   28.40
  -3  -4   4  105.09    9.20
   3  -4  -4   56.99   30.70
   3  -4  -4   15.80   62.99
  -3  -4   4   72.49   52.09
  -3   4   3  605.44   79.69
  -3   4   3  773.52   63.69
   3   4  -3  695.63   54.99
  -3   4   3  686.93   42.40
  -3   4   3  696.53   52.09
  -3  -4   3  628.14   57.99
   3  -4  -3  730.33   96.39
   3  -4  -3  609.14   52.79
  -3  -4   3  530.15   76.69
  -3   4   2   26.40    7.00
  -3   4   2   -5.60   21.30
   3   4  -2   32.40   23.30
  -3   4   2  -12.50   50.19
   3  -4  -2   11.70   48.10
  -3  -4   2    3.90   26.70
  -3  -4   2   15.70    8.10
  -3   4   1  321.57   36.20
  -3   4   1  328.57   21.50
   3   4  -1  290.17   52.09
   3   4  -1  314.17   36.20
  -3   4   1  302.47   62.69
   3  -4  -1  358.06   84.99
  -3  -4   1  241.38   41.20
   3   4   0  184.88   30.40
   3   4   0  192.58   42.30
   3   4   0  201.08   51.89
  -3   4   0  164.38   32.20
  -3   4   0  195.98   14.40
  -3  -4   0  158.88   35.00
  -3  -4   0  160.78   15.50
   3  -4   0  184.48   57.49
  -3   4  -1  554.94   47.50
  -3   4  -1  535.25   32.60
   3   4   1  519.05   61.79
   3   4   1  442.66   50.19
   3   4   1  525.75   45.00
   3  -4   1  402.86   86.99
  -3  -4  -1  500.85   34.50
  -3  -4  -1  533.75   56.89
   3   4   2  233.08   31.10
   3   4   2  259.37   56.39
   3   4   2  253.07   38.80
  -3  -4  -2  166.78   17.20
  -3  -4  -2  240.28   45.80
   3   4   3  -19.50   24.50
   3   4   3    4.20   47.00
   3   4   3    3.40   18.30
  -3  -4  -3    3.80    8.50
  -3  -4  -3   -1.90    4.10
  -3  -4  -3   -8.70   42.00
   3   4   4  441.56   59.89
  -3   4  -4  445.26   56.09
   3   4   4  514.25   74.09
   3  -4   4  561.34   51.69
  -3  -4  -4  472.75   35.30
  -3  -4  -4  568.04   31.10
  -3  -4  -4  563.44   76.99
  -3   4  -5   44.30   22.10
   3   4   5   20.60   20.10
   3   4   5   50.69   32.50
   3   4   5   83.69   62.99
  -3   4  -5    5.80   24.40
   3   4   5   -7.40   20.80
   3  -4   5   36.80    6.30
  -3  -4  -5   55.79   12.10
   3  -4   5  -13.00   32.50
  -3  -4  -5   34.50    6.30
  -3  -4  -5   81.89   59.49
  -3  -4  -5   10.20   11.60
  -3   4  -6   39.40   25.00
   3   4   6   26.80   72.19
   3   4   6    0.10   26.70
   3   4   6    4.50   19.70
   3   4   6   41.40   22.90
  -3   4  -6   27.10   19.80
   3  -4   6   45.60    7.00
  -3  -4  -6   89.29   73.39
  -3  -4  -6   48.40    9.40
   3  -4   6   53.79   38.80
  -3  -4  -6   27.80    6.10
  -3  -4  -6   30.10   14.30
   3   4   7   98.99   40.40
   3   4   7  129.29   27.40
  -3   4  -7  148.29   31.30
   3   4   7  -45.10   93.99
   3   4   7  148.99   30.40
  -3  -4  -7  145.59   12.10
  -3  -4  -7  138.79   14.30
   3  -4   7  144.89   10.70
   3  -4   7  109.39   18.40
  -3  -4  -7   34.70   88.69
  -3  -4  -7  141.39   22.60
   3  -4   7  165.88   51.09
   3   4   8   72.69   24.10
   3   4   8   75.29   23.80
   3   4   8   49.10   20.20
   3   4   8   36.30   27.90
  -3   4  -8   60.99   23.20
  -3   4  -8   70.99   18.80
  -3  -4  -8 -131.89  120.89
  -3  -4  -8   50.69   10.00
   3  -4   8   57.89    7.00
   3  -4   8   58.59   12.80
  -3  -4  -8   56.39    8.90
   3  -4   8   64.99   62.49
   3   4   9    6.90   18.60
   3   4   9   13.80   22.50
   3   4   9   27.70   18.40
   3   4   9   40.10   20.90
  -3   4  -9   31.10   18.10
   3  -4   9   23.60    8.00
   3  -4   9   37.80    6.70
  -3  -4  -9   40.10    7.10
  -3  -4  -9   32.90    7.20
  -3   4 -10    0.30   13.50
   3   4  10   31.80   13.90
   3   4  10   -5.00   15.60
   3   4  10   14.90   31.10
   3  -4  10   53.19    9.60
  -3  -4 -10   27.40    8.80
   3   4  11   26.20   17.30
   3   4  11   19.30   13.20
   3   4  11    1.70   15.10
  -3   4 -11    8.10   11.30
   3  -4  11   18.10    5.10
   3  -4  11   18.90    5.50
  -3  -4 -11   45.80   14.40
   3  -4  11   36.80   21.70
   3   4  12   28.60   17.60
   3   4  12   30.20   10.90
  -3   4 -12   35.70   10.80
  -3  -4 -12   35.20   14.10
   3  -4  12   32.30    4.90
  -3   5  12   31.70    9.40
  -3   5  12   18.70   14.40
  -3   5  12   40.30   11.00
   3  -5 -12   23.60    5.60
  -3  -5  12   36.50    5.70
  -3   5  11    3.90   10.50
  -3   5  11    5.00   10.30
  -3   5  11   19.00   13.90
   3   5 -11   12.30   10.90
   3  -5 -11   12.00    5.30
  -3  -5  11   31.10    6.70
  -3  -5  11   16.20    5.30
   3  -5 -11   18.80   11.70
   3  -5 -11   32.20    7.00
  -3   5  10   62.69   18.00
   3   5 -10  121.99   33.10
   3   5 -10   38.60   27.40
   3  -5 -10   80.69   12.70
  -3  -5  10   91.79   10.20
  -3  -5  10   70.69   11.20
   3  -5 -10   79.09   10.20
   3   5  -9    2.80   25.60
   3   5  -9   21.30   17.00
  -3   5   9   -7.10   16.10
  -3   5   9   -2.50   17.60
  -3   5   9   11.60   17.50
  -3  -5   9    4.00    4.80
  -3  -5   9   16.20    7.40
   3  -5  -9    1.90    6.70
   3  -5  -9   10.50    5.80
   3   5  -8  167.08   39.60
  -3   5   8  208.58   33.60
   3   5  -8  198.88   31.90
  -3   5   8  162.88   33.30
  -3  -5   8  218.48   15.20
  -3  -5   8   63.29   95.59
   3  -5  -8  242.18   15.70
  -3  -5   8  225.88   18.70
   3  -5  -8  163.38   91.79
   3  -5  -8  206.08   18.10
  -3   5   7  153.98   34.50
  -3   5   7  164.78   34.50
   3   5  -7  177.88   42.10
   3   5  -7  177.28   35.90
  -3   5   7  183.38   31.80
  -3   5   7  152.48   29.50
  -3  -5   7  173.18   13.30
   3  -5  -7  159.88   18.80
   3  -5  -7  190.88   13.70
   3  -5  -7  136.99   79.59
  -3  -5   7  183.38   19.90
  -3  -5   7   93.09   68.39
   3   5  -6    6.90   26.90
  -3   5   6   30.30   23.30
  -3   5   6   39.40   21.20
  -3   5   6   -3.40   24.40
   3   5  -6    6.40   25.30
   3  -5  -6  -56.99   68.49
  -3  -5   6  -34.40  106.89
  -3  -5   6   70.59   57.69
  -3   5   5  189.38   30.60
   3   5  -5  132.79   37.70
  -3   5   5  168.78   19.10
   3   5  -5  208.38   46.20
  -3   5   5  128.49   30.30
  -3   5   5  159.88   32.90
  -3   5   5  177.98   38.30
   3  -5  -5  365.06   79.69
   3  -5  -5  182.28   14.40
  -3  -5   5   82.59   99.89
  -3  -5   5  186.08   54.49
  -3  -5   5  185.88   14.20
   3   5  -4   24.80   26.40
  -3   5   4   59.49   25.70
  -3   5   4   40.70   25.00
  -3   5   4   36.20   21.20
  -3   5   4    0.70   30.10
  -3   5   4   37.30   12.20
  -3  -5   4   36.00   84.99
   3  -5  -4   69.19   47.40
  -3  -5   4   47.10    7.00
  -3  -5   4   43.60   39.90
   3   5  -3   20.20   24.90
  -3   5   3   15.70   10.80
  -3   5   3   17.80   19.90
  -3   5   3   31.10   25.10
  -3   5   3    2.70   25.70
  -3   5   3   -3.80   34.10
  -3  -5   3   -0.70   79.59
  -3  -5   3   49.50   39.80
   3   5  -2  229.48   34.90
  -3   5   2  220.98   18.90
  -3   5   2  220.98   42.20
  -3   5   2  236.08   42.50
  -3   5   2  239.38   33.40
  -3  -5   2  153.98   43.60
   3  -5  -2  185.48   35.30
  -3  -5   2   60.99   78.29
  -3   5   1   70.49   24.10
   3   5  -1   81.79   25.40
  -3   5   1  124.49   30.80
  -3   5   1   51.39   28.30
  -3  -5   1   49.99   39.80
  -3  -5   1   83.69   17.70
  -3   5   0   70.69   13.40
  -3   5   0   66.89   27.00
   3   5   0  106.19   62.59
  -3   5   0  116.69   26.80
   3   5   0   87.79   24.90
  -3   5   0  130.69   34.90
  -3   5   0   12.30   39.50
  -3  -5   0   94.19   43.70
   3   5   1  286.07   73.79
   3   5   1  153.38   32.40
  -3   5  -1  198.58   32.60
  -3   5  -1   98.59   37.30
   3   5   1  177.08   37.30
  -3  -5  -1   99.99   47.60
  -3  -5  -1  138.69   18.60
   3   5   2   23.00   21.60
   3   5   2   30.00   70.09
  -3   5  -2   28.60   28.30
   3   5   2   47.50   26.20
  -3   5  -2   21.30   25.60
  -3  -5  -2    4.30   14.50
  -3  -5  -2   33.10    5.40
  -3  -5  -2   71.89   51.09
   3   5   3  409.66   90.09
  -3   5  -3  310.37   42.50
   3   5   3  332.37   39.00
   3   5   3  280.67   36.80
   3   5   3  239.38   49.20
  -3   5  -3  260.47   44.90
   3  -5   3  306.77   42.50
  -3  -5  -3  333.67   19.50
  -3  -5  -3  256.47   26.50
   3   5   4   52.89   81.29
   3   5   4   57.09   24.00
   3   5   4   27.30   22.90
   3   5   4   15.70   27.00
  -3   5  -4  118.69   42.10
  -3   5  -4  103.29   23.70
   3  -5   4   77.19   35.20
  -3  -5  -4   69.99   17.70
  -3  -5  -4  108.09   64.89
  -3   5  -5   55.99   22.80
  -3   5  -5   23.70   23.20
   3   5   5   67.59   27.10
   3   5   5    2.90   99.39
   3   5   5   53.59   24.30
   3   5   5   38.10   22.30
  -3  -5  -5   40.40    7.50
  -3  -5  -5   61.19   10.50
   3  -5   5   23.00    7.00
  -3  -5  -5  187.88   77.19
  -3  -5  -5   29.60   18.10
   3  -5   5   44.50   42.90
  -3   5  -6   27.50   30.60
   3   5   6   12.40   20.90
  -3   5  -6   27.20   20.60
   3   5   6   10.00   23.40
   3   5   6   35.20   20.80
  -3  -5  -6   45.10    8.10
  -3  -5  -6   75.59   91.59
   3  -5   6   36.30    6.10
   3  -5   6   59.39   49.80
  -3  -5  -6   50.79    9.70
  -3   5  -7   54.59   20.40
   3   5   7   24.40   19.40
   3   5   7   64.99   24.20
   3   5   7   23.80   20.00
  -3  -5  -7   44.40    8.60
   3  -5   7   42.10    7.10
  -3  -5  -7   53.29    8.50
   3   5   8   32.00   17.80
  -3   5  -8   99.69   20.50
   3   5   8   91.49   22.90
   3  -5   8   61.99   13.80
  -3  -5  -8   66.79    9.90
  -3  -5  -8   65.59    8.70
   3  -5   8   70.09    7.80
   3   5   9   -7.50   14.80
   3   5   9   -8.60   13.60
   3   5   9   11.10   14.70
  -3   5  -9   -7.10   12.80
  -3  -5  -9   -4.00    6.20
  -3  -5  -9    1.40    4.90
   3  -5   9   -5.10    4.60
   3  -5   9   -0.50    6.70
  -3   5 -10    9.00    9.30
   3   5  10    7.40   11.70
   3   5  10    3.50   10.70
   3  -5  10   26.50    6.60
  -3  -5 -10   26.50    7.40
  -3   6  10   11.50   10.10
  -3   6  10   25.60    9.70
  -3   6  10   -0.30    8.00
   3  -6 -10    7.60   12.10
  -3  -6  10   19.70    4.40
   3  -6 -10   15.40    5.10
  -3   6   9   25.50   13.20
  -3   6   9   25.00   12.70
   3   6  -9   35.20   13.40
  -3  -6   9   27.90    5.50
   3  -6  -9   24.80    6.10
  -3  -6   9   36.90    6.80
   3  -6  -9   63.19   11.90
   3  -6  -9   20.70   14.30
   3   6  -8   89.29   31.90
   3   6  -8  123.49   26.00
   3  -6  -8  113.19   12.00
   3  -6  -8  100.69   10.50
  -3  -6   8  102.19    9.20
  -3  -6   8   92.39   12.10
  -3   6   7   44.20   16.80
  -3   6   7   39.60   18.10
   3   6  -7   26.00   24.70
   3  -6  -7   32.00    8.50
   3  -6  -7   49.40   10.10
  -3  -6   7   51.49   11.70
  -3   6   6   -0.20   15.30
  -3   6   6   16.50   17.50
  -3   6   6  -33.60   23.00
   3   6  -6   19.00   25.70
  -3   6   6   -4.10   15.00
   3  -6  -6   13.00    6.70
  -3  -6   6   15.80    5.70
  -3   6   5   18.10   18.70
  -3   6   5   12.10   18.50
  -3   6   5   19.20   18.60
  -3   6   5    9.30   28.20
   3   6  -5   -2.50   23.30
   3  -6  -5   35.70    7.50
  -3  -6   5    3.20    5.90
  -3   6   4   53.09   19.30
  -3  -6   4   74.79    9.30
  -3  -6   4  151.88   68.39
   3  -6  -4   45.20   83.09
  -3   6   3   57.19   22.70
   3   6  -3    1.20   23.40
  -3   6   3   45.40   20.20
  -3   6   3   11.60   19.20
  -3  -6   3  -92.19   56.99
  -3   6   2  104.59   24.10
  -3   6   2  125.19   25.70
  -3  -6   2  142.09   60.79
  -3   6   1   92.89   23.90
   3   6  -1   47.30   24.60
  -3   6   1   74.19   23.30
  -3   6   1  102.59   25.50
  -3  -6   1  125.29   58.29
   3   6   0   18.50   22.20
  -3  -6   0  -32.30   61.59
  -3   6  -1  222.98   57.79
   3   6   1  109.69   30.20
  -3  -6  -1  235.78   67.49
  -3  -6  -1  158.18   12.40
   3   6   2   21.90   23.40
  -3   6  -2    1.20   25.90
  -3  -6  -2   34.30   69.39
  -3  -6  -2   50.09    8.00
  -3   6  -3   65.69   26.40
  -3  -6  -3  235.48  103.09
  -3  -6  -3   68.49    8.60
   3   6   4  104.49   27.60
  -3   6  -4   40.60   20.00
   3   6   4   58.59   24.90
   3   6   4   48.80   23.00
  -3  -6  -4   69.39    8.70
  -3  -6  -4   51.79   12.20
   3   6   5  -18.80   25.90
   3   6   5   15.10   18.90
   3   6   5    2.80   19.20
  -3   6  -5   -1.10   16.30
  -3  -6  -5    6.70    5.70
  -3  -6  -5   30.20    8.80
   3   6   6   87.69   24.50
   3   6   6   99.39   26.00
  -3  -6  -6   85.99   12.10
   3  -6   6   84.49    9.30
   3   6   7   29.50   16.90
   3   6   7    6.80   15.70
   3   6   7    4.70   13.80
  -3   6  -7    7.60   13.30
   3  -6   7   16.10    5.40
  -3  -6  -7   13.60    5.70
  -3  -6  -7   16.10    5.60
   3   6   8  -11.70   14.90
   3   6   8  -12.00   12.60
  -3   6  -8   -2.90    8.70
  -3  -6  -8    3.40    5.50
   3  -6   8    1.00    5.40
   3  -6   8   13.00    7.30
  -3  -6  -8   -5.40    5.50
  -3   7   7    0.80    8.50
  -3   7   7  -10.00   10.60
  -3   7   6   -3.90    9.80
  -3   7   6    5.20   11.50
  -3   7   5   12.70   11.40
  -3   7   5   -3.30   12.00
   3   7  -5   -2.40   23.30
  -3  -7   5   36.20   10.40
  -3   7   4    4.80   12.40
   3   7  -4    1.90   28.00
  -3   7   4   -0.20   14.40
  -3  -7   4   13.60    6.90
  -3   7   3    3.10   16.50
   3   7  -3    2.50   20.70
  -3   7   3   15.60   13.70
   3   7  -2    3.70   20.40
   3   7  -1    8.30   19.80
   3   7   0   14.50   18.40
  -3  -7   0   24.90    6.90
   3   7   1    3.30   17.60
  -3  -7  -1   -3.20    5.90
   3   7   2   10.70   17.40
  -3  -7  -2   20.70    6.30
   3   7   3   12.90   15.00
  -3  -7  -3   60.89    9.00
  -3   7  -4   37.30   17.00
   3   7   4   12.60   15.00
   3   7   4    3.90   20.40
  -3  -7  -4   32.10    6.70
  -3  -7  -4   25.60    8.80
   3   7   5   21.00   14.50
   3   7   5    9.20   17.00
  -3   7  -5   -3.70   22.80
  -3  -7  -5   27.50    6.80
   3   7   6    8.10   16.40
  -3   7  -6   -7.00   10.30
   3   7   6    6.60   13.10
  -3  -7  -6   -1.00    4.80
   4   0 -15   -1.30   15.60
  -4   0  14   18.10   17.40
   4   0 -14   18.90   18.20
   4   0 -13  163.48   26.90
  -4   0  13  209.58   37.20
   4   0 -12  539.35   45.30
  -4   0  12  536.55   51.09
  -4   0  12  452.25   49.10
  -4   0  11  464.45   53.69
  -4   0  11  428.86  109.69
   4   0 -11  483.15   43.00
   4   0 -10  403.86   37.50
  -4   0  10  382.86   86.59
  -4   0  10  412.26   56.39
   4   0  -9  408.36   38.00
  -4   0   9  480.65   73.39
  -4   0   8  238.68   19.30
   4   0  -8  279.17   29.50
  -4   0   8  277.17   55.39
   4   0  -8  243.68   20.60
   4   0  -8  311.17   63.99
   4   0  -7  148.09   34.60
  -4   0   7  245.98   49.70
   4   0  -7  172.88   26.10
  -4   0   7  190.18   13.40
  -4   0   6  579.84   34.10
   4   0  -6  572.14   78.99
   4   0  -6  623.34   52.09
  -4   0   6  451.05   54.69
   4   0  -5  329.67   34.80
  -4   0   5  225.78   53.49
  -4   0   5  379.36   45.00
  -4   0   5  317.47   20.00
   4   0  -5  290.47   55.29
  -4   0   4   17.80   30.50
   4   0  -4    5.00   29.20
  -4   0   4   41.10   24.70
   4   0  -4   19.80   13.40
  -4   0   3 1654.33   94.69
  -4   0   3 1572.74  105.29
  -4   0   3 1647.04  106.49
  -4   0   3 1542.55  106.29
   4   0  -3 1581.84  102.59
   4   0  -3 1737.73  105.39
  -4   0   2  496.15   42.80
  -4   0   2  542.15   46.50
  -4   0   2  531.65   43.10
   4   0  -2  545.55   43.20
   4   0  -2  524.55   39.30
  -4   0   2  581.94   32.50
  -4   0   1 8600.44  532.55
   4   0  -1 9187.38  531.65
  -4   0   1 9239.78  526.25
   4   0  -1 9999.00  532.15
  -4   0   1 7937.01  531.45
  -4   0   1 9791.52  533.85
  -4   0   0 2372.96  146.29
   4   0   0 2445.06  142.69
   4   0   0 2296.57  140.59
  -4   0   0 2489.95  137.09
   4   0   0 2175.58  141.89
   4   0   1  396.06   34.60
   4   0   1  455.95   33.50
  -4   0  -1  509.25   28.50
   4   0   1  465.85   33.80
  -4   0  -1  496.05   50.49
  -4   0  -2 1562.94   88.99
   4   0   2 1536.65   96.99
   4   0   2 1453.05   94.79
  -4   0  -2 1525.55  106.79
   4   0   2 1508.15   94.79
  -4   0  -3  294.07   60.99
  -4   0  -3  232.28   14.60
   4   0   3  190.88   13.70
   4   0   3  228.68   29.60
  -4   0  -3  195.18   22.80
   4   0   3  224.48   30.70
   4   0   3  190.48   32.70
  -4   0  -4  433.36   41.70
   4   0   4  438.36   28.20
   4   0   4  489.15   47.10
   4   0   4  490.95   49.40
  -4   0  -4  511.55   29.50
  -4   0  -5   64.49    8.10
   4   0   5   58.29   40.00
   4   0   5   86.59   35.70
   4   0   5   51.59    6.30
   4   0   6   43.50    6.80
  -4   0  -6   21.70   33.80
   4   0   6   56.79   10.20
   4   0   6   24.90   51.59
   4   0   6   80.89   42.40
  -4   0  -6   45.30    9.00
   4   0   7  263.57   43.80
   4   0   7  304.67   21.30
  -4   0  -7  317.87  100.99
   4   0   7  285.07   69.49
   4   0   7  293.07   20.10
   4   0   8   42.00   32.30
   4   0   8   56.09   11.70
   4   0   8  138.19   96.39
   4   0   9  431.56   44.80
   4   0   9  368.26   51.49
   4   0  10  409.46   50.99
   4   0  10  552.84   47.90
   4   0  11   26.20   19.90
   4   0  11   35.00   25.40
   4   0  12    0.50   29.60
   4   0  12   31.80   14.80
   4   0  13   34.90   12.10
   4   1 -15   19.40   17.00
  -4   1  15    0.50   12.00
   4  -1 -15   44.10   17.80
   4   1 -14   13.20   16.10
   4  -1 -14   15.60   13.50
  -4  -1  14   20.00   16.00
   4   1 -13   13.80   19.50
  -4   1  13   13.20   17.70
   4  -1 -13    3.50   15.60
   4   1 -12  237.28   33.10
  -4   1  12  189.18   35.40
   4  -1 -12  258.07   30.60
   4   1 -11   11.70   20.20
  -4   1  11   12.70   38.00
  -4   1  11  -78.89   94.19
  -4  -1  11    9.00    6.80
   4  -1 -11   14.30   17.80
  -4  -1  11    5.90   82.29
  -4   1  10   87.59   73.99
   4   1 -10  119.19   26.60
   4   1 -10  154.38   30.10
  -4   1  10  126.69   31.90
  -4  -1  10  125.69   13.10
   4  -1 -10  161.98   15.00
   4  -1 -10  130.79   25.50
  -4  -1  10  116.49   68.99
   4   1  -9  204.18   41.70
  -4   1   9  287.77   72.29
   4   1  -9  172.58   27.40
   4  -1  -9  174.88   15.50
   4  -1  -9  197.08   27.40
  -4  -1   9  266.17   66.89
  -4  -1   9  196.28   15.40
  -4  -1   9  182.08   14.30
   4  -1  -9  191.08   16.10
   4   1  -8   56.69   20.90
  -4   1   8   17.20   46.50
  -4   1   8   37.40    7.90
  -4  -1   8   49.70    6.40
  -4  -1   8   17.10   44.00
   4  -1  -8   31.30   17.20
   4  -1  -8   35.70    6.90
   4  -1  -8   41.00    7.90
  -4  -1   8   46.30    8.00
   4  -1  -8   51.59   78.39
  -4  -1   8   11.90   58.69
  -4   1   7  670.83   45.50
   4   1  -7  711.43   56.39
  -4   1   7  675.13   75.69
   4   1  -7  836.62   69.29
  -4  -1   7  746.93   79.69
   4  -1  -7  802.52   71.09
   4  -1  -7  759.52   44.90
   4  -1  -7  732.73   45.70
  -4  -1   7  782.62   44.80
   4  -1  -7  695.83   84.39
  -4  -1   7  801.02   45.80
  -4  -1   7  681.33   72.69
   4  -1  -7  840.52   54.09
  -4   1   6  248.28   45.30
   4   1  -6  238.88   36.30
   4  -1  -6  210.68   14.20
  -4  -1   6  274.87   45.60
  -4  -1   6  199.98   13.90
   4  -1  -6  183.18   38.30
  -4  -1   6  206.38   13.80
   4  -1  -6  157.18   45.70
  -4  -1   6  228.18   41.60
  -4   1   5  301.37   43.20
   4   1  -5  281.57   32.70
  -4   1   5  258.37   17.20
  -4  -1   5  281.97   16.80
   4  -1  -5  288.57   35.10
  -4  -1   5  249.68   38.70
  -4  -1   5  250.67   16.60
   4  -1  -5  204.48   42.80
  -4  -1   5  240.38   36.90
  -4   1   4  893.71   52.09
  -4   1   4  815.52   66.09
   4   1  -4  907.71   62.09
  -4  -1   4  842.72   68.29
   4  -1  -4  888.51   64.79
  -4  -1   4  893.21   63.79
   4  -1  -4  903.01   65.29
   4  -1  -4  791.72   51.39
  -4  -1   4  936.91   51.69
  -4   1   3  270.67   31.50
   4   1  -3  275.17   25.20
  -4   1   3  259.87   17.50
   4  -1  -3  259.67   28.50
  -4  -1   3  269.77   31.90
  -4  -1   3  241.08   33.30
  -4  -1   3  301.87   17.50
  -4  -1   3  248.48   33.70
   4  -1  -3  316.47   29.90
  -4   1   2 1450.25  100.29
  -4   1   2 1640.44   93.39
   4   1  -2 1507.65   97.59
   4  -1  -2 1673.63   99.29
  -4  -1   2 1533.95  104.69
   4  -1  -2 1617.44  102.79
  -4  -1   2 1595.04  100.29
  -4  -1   2 1657.83  102.29
  -4  -1   2 1684.43   93.29
  -4   1   1 1785.52   93.79
   4   1  -1 1529.35   96.69
   4  -1  -1 1515.45  101.69
  -4  -1   1 1689.73  103.49
  -4  -1   1 1350.06   96.89
  -4  -1   1 1645.44   93.69
   4  -1  -1 1695.73   98.49
   4   1   0  595.04   38.90
   4   1   0  599.14   46.20
   4   1   0  682.03   67.19
  -4   1   0  678.43   37.20
   4   1   0  605.24   38.40
   4  -1   0  635.94   42.90
   4  -1   0  565.04   45.60
  -4  -1   0  687.93   49.10
   4  -1   0  523.65   45.80
  -4  -1   0  647.34   37.40
   4   1   1  215.68   43.10
   4   1   1  209.68   17.50
  -4   1  -1  277.27   15.60
   4   1   1  223.78   27.60
   4  -1   1  230.88   28.10
  -4  -1  -1  241.68   16.00
  -4  -1  -1  251.97   35.80
   4  -1   1  209.78   27.00
   4  -1   1  259.07   23.60
  -4   1  -2  157.28   10.40
   4   1   2  143.79   17.10
   4   1   2  132.09   17.20
   4   1   2  191.28   41.80
   4   1   2  126.29   23.50
  -4  -1  -2  137.69   10.90
  -4  -1  -2  204.18   35.90
   4  -1   2  144.19   22.30
   4   1   3  528.45   41.50
  -4   1  -3  536.35   29.70
   4   1   3  485.45   43.60
  -4   1  -3  437.76   40.50
  -4  -1  -3  522.95   55.59
   4  -1   3  469.85   29.00
   4  -1   3  429.76   39.20
  -4  -1  -3  465.95   30.40
   4   1   4  828.72   69.19
  -4   1  -4  859.21   50.89
  -4   1  -4  816.92   65.59
  -4  -1  -4  828.82   50.59
  -4  -1  -4  897.11   59.19
  -4  -1  -4  824.02   84.29
   4  -1   4  841.62   50.29
  -4  -1  -4  848.52   51.99
   4  -1   4  976.80   65.89
  -4   1  -5  106.49   30.90
   4   1   5  109.49   35.10
  -4  -1  -5  122.59   16.00
  -4  -1  -5  129.99   11.00
   4  -1   5  159.38   41.50
  -4  -1  -5   99.09   64.59
   4  -1   5  160.78   36.10
  -4  -1  -5  132.59   26.40
   4  -1   5  120.09    9.20
  -4  -1  -5  130.99   11.80
  -4   1  -6  390.26   66.89
   4   1   6  498.05   62.29
   4   1   6  453.05   44.70
  -4  -1  -6  460.15   30.60
  -4  -1  -6  495.35   29.10
  -4  -1  -6  454.65   29.60
   4  -1   6  478.65   30.40
   4  -1   6  452.95   28.10
   4  -1   6  459.55   70.29
   4   1   7   52.59   54.69
   4   1   7   -5.60   22.30
  -4  -1  -7   16.20    8.30
   4  -1   7    7.20    4.20
   4  -1   7   11.80    6.70
   4  -1   7   24.80   52.19
  -4  -1  -7    5.90   10.40
   4   1   8  244.58   45.00
   4   1   8   96.09   72.49
  -4   1  -8  280.77   29.60
   4   1   8  272.77   41.90
   4  -1   8  274.87   17.70
   4  -1   8  252.17   19.40
   4  -1   8  294.77   81.39
   4  -1   8  242.68   50.19
   4   1   9  358.86   49.00
   4   1   9  399.06   48.30
   4   1   9  357.46   45.00
   4  -1   9  419.46   26.00
   4  -1   9  426.26   27.00
   4  -1   9  415.36   55.59
   4   1  10   83.49   27.00
   4   1  10   89.79   23.20
   4  -1  10   62.19   11.40
   4   1  11   86.29   20.40
   4   1  11   61.19   20.60
   4  -1  11   58.19   19.60
   4   1  12   -8.40   17.80
   4   1  12  -10.30   15.40
   4  -1  12   15.80   15.30
   4   1  13  150.48   19.90
   4  -1  13  110.89   18.90
  -4   2  15   42.30   12.10
   4  -2 -15   39.50   14.10
  -4  -2  15   18.00   11.10
  -4   2  14    5.30   11.20
   4   2 -14    7.20   17.10
   4  -2 -14   31.10   14.60
  -4  -2  14   25.30   12.10
  -4   2  13  171.58   28.40
   4  -2 -13  183.68   25.30
  -4   2  12    6.30   17.80
  -4  -2  12    3.60    8.10
   4  -2 -12    7.20    9.80
  -4   2  11  166.18   36.20
   4   2 -11  170.78   32.20
  -4   2  11  110.29  119.99
   4   2 -11  139.49   31.30
  -4  -2  11  149.39   13.10
   4  -2 -11  147.79   14.80
   4  -2 -11  145.49   25.30
  -4  -2  11  -31.40   99.19
  -4  -2  11  134.59   13.80
   4  -2 -11  126.09   18.10
  -4   2  10  224.98   50.39
  -4   2  10  278.47   42.60
   4   2 -10  313.37   37.70
  -4   2  10  235.28   89.49
   4   2 -10  322.57   39.80
  -4  -2  10  274.47   19.00
   4  -2 -10  315.67   31.40
  -4  -2  10  156.48   83.19
   4  -2 -10  294.67   20.90
   4  -2 -10  265.07   20.20
  -4  -2  10  284.47   20.40
  -4   2   9  -22.40   34.20
  -4   2   9   20.60   27.70
   4   2  -9   46.40   23.80
  -4   2   9    9.10   28.10
  -4   2   9   21.10   10.10
   4   2  -9   31.90   22.60
  -4  -2   9   17.80    5.30
   4  -2  -9   15.30    5.80
  -4  -2   9   -3.70   70.99
  -4  -2   9   99.29   73.19
   4  -2  -9   19.50    6.70
   4  -2  -9   20.70   17.70
  -4  -2   9   17.50    6.70
   4  -2  -9   51.69   93.49
  -4   2   8  159.18   61.79
   4   2  -8  123.69   30.70
  -4   2   8  118.99   12.20
  -4   2   8  135.49   34.80
   4  -2  -8   85.89   62.09
  -4  -2   8  168.38   56.39
  -4  -2   8  111.19   12.50
   4  -2  -8  124.39   12.90
  -4  -2   8  124.49   10.00
   4  -2  -8  123.99   10.60
  -4  -2   8   92.69   56.09
  -4   2   7    9.90    6.00
  -4   2   7    7.80   45.10
   4   2  -7   10.60   39.30
   4   2  -7   28.00   21.80
  -4   2   7   13.40   26.30
   4  -2  -7   20.30    5.00
   4  -2  -7   -1.40   42.90
  -4  -2   7   17.60    7.30
   4  -2  -7   20.10    7.30
   4  -2  -7  -17.80   45.40
  -4  -2   7   34.60   40.90
  -4  -2   7   15.10    4.60
  -4  -2   7   45.10   45.90
   4   2  -6  829.02   69.69
  -4   2   6  684.03   73.49
  -4   2   6  782.52   46.50
   4   2  -6  718.03   58.79
   4  -2  -6  776.52   72.29
  -4  -2   6  717.83   71.89
  -4  -2   6  779.32   70.59
  -4   2   5  349.27   21.20
  -4   2   5  314.87   45.60
   4  -2  -5  309.27   19.80
  -4  -2   5  293.07   41.50
  -4  -2   5  334.77   20.10
   4  -2  -5  292.77   44.70
  -4  -2   5  316.97   19.80
  -4  -2   5  301.97   48.00
   4  -2  -5  207.38   40.70
  -4   2   4  210.08   13.50
  -4   2   4  203.18   35.40
   4   2  -4  154.88   29.80
  -4  -2   4  157.18   29.30
  -4  -2   4  169.38   40.10
  -4  -2   4  186.18   12.70
   4  -2  -4  173.18   34.10
   4  -2  -4  166.88   12.60
  -4  -2   4  182.08   12.30
   4  -2  -4  198.28   29.10
   4   2  -3  721.43   49.20
  -4   2   3  720.73   54.59
  -4   2   3  709.93   40.00
   4  -2  -3  637.14   53.49
  -4  -2   3  564.14   59.89
  -4  -2   3  695.33   39.50
  -4  -2   3  622.84   52.09
   4  -2  -3  577.14   46.30
  -4  -2   3  559.54   57.79
  -4  -2   3  648.54   38.60
   4   2  -2   96.59   17.00
  -4   2   2  107.19    8.50
  -4   2   2  122.29   26.80
  -4  -2   2   83.79   24.70
   4  -2  -2   78.49   21.60
   4  -2  -2  116.39   18.50
  -4  -2   2  115.79    8.80
  -4  -2   2  136.09   25.60
  -4   2   1 1056.99   58.69
   4   2  -1  971.90   71.79
   4  -2  -1  858.91   71.49
  -4  -2   1  961.20   58.79
  -4  -2   1 1016.80   69.29
   4  -2  -1 1024.30   63.19
  -4   2   0  321.17   18.50
   4   2   0  247.18   32.90
  -4  -2   0  263.97   18.80
   4  -2   0  298.07   24.60
   4  -2   0  237.28   34.90
  -4  -2   0  299.77   36.50
   4   2   1  106.29   25.10
  -4   2  -1   68.89    6.20
  -4  -2  -1   62.09    7.20
   4  -2   1   72.39   15.00
  -4  -2  -1   90.39   27.50
  -4   2  -2  371.46   23.10
   4   2   2  323.37   41.90
   4  -2   2  357.56   32.50
  -4  -2  -2  389.96   22.60
  -4  -2  -2  402.86   48.80
   4   2   3    1.90   28.50
  -4   2  -3   11.00    4.30
  -4  -2  -3    8.20    3.50
   4  -2   3    3.20    4.90
  -4  -2  -3   15.10   34.40
  -4  -2  -3    0.00    5.40
   4  -2   3   16.40   17.70
   4   2   4  281.67   48.50
   4   2   4  321.57   37.20
  -4   2  -4  375.56   49.90
  -4  -2  -4  421.56   23.40
  -4  -2  -4  374.56   25.90
  -4  -2  -4  434.86   67.19
   4  -2   4  387.66   23.20
   4   2   5  250.87   50.69
  -4   2  -5  287.47   59.19
   4   2   5  258.87   40.90
   4   2   5  304.57   34.70
   4  -2   5  330.87   19.90
  -4  -2  -5  300.97   22.00
   4  -2   5  294.27   42.40
  -4  -2  -5  339.67   20.30
  -4  -2  -5  335.27   23.30
  -4  -2  -5  466.35   72.89
   4   2   6   83.89   28.00
   4   2   6  112.09   25.70
   4   2   6   14.50   46.20
   4  -2   6   71.39   37.10
  -4  -2  -6   94.39   12.30
   4  -2   6  102.99    8.40
   4  -2   6  111.49   15.90
  -4  -2  -6    8.10   70.89
  -4  -2  -6   85.59   11.80
  -4  -2  -6  106.99    9.70
   4   2   7  129.79   33.40
  -4   2  -7  131.19   38.90
   4   2   7  122.69   32.30
   4   2   7   64.69   62.39
  -4   2  -7  136.79   27.70
   4   2   7  158.98   38.10
  -4  -2  -7  127.09   17.10
   4  -2   7  171.68   14.40
  -4  -2  -7  137.49   12.30
  -4  -2  -7  143.09   13.70
   4  -2   7  189.98   49.80
   4   2   8  114.99   30.30
  -4   2  -8  159.08   36.40
   4   2   8  117.59   29.10
   4   2   8  126.59   32.40
  -4   2  -8  143.59   24.10
   4   2   8  164.58   40.10
   4   2   8  -49.10   80.39
  -4  -2  -8  144.49   14.60
  -4  -2  -8  137.29   13.10
   4  -2   8  130.99   66.09
   4  -2   8  115.69   13.10
   4  -2   8  117.89   10.10
   4   2   9  292.97   44.50
   4   2   9  337.97   44.20
  -4   2  -9  307.17   53.79
  -4  -2  -9  406.96   25.60
   4  -2   9  447.96  110.49
   4  -2   9  381.96   25.40
   4  -2   9  382.46   23.80
  -4   2 -10   63.79   25.00
   4   2  10   81.49   30.00
   4   2  10   50.79   19.80
   4   2  10   74.29   23.30
   4  -2  10   93.79   10.50
  -4  -2 -10  166.28   52.19
   4  -2  10   79.29   11.10
   4   2  11    1.80   16.90
   4   2  11  -14.10   15.00
   4  -2  11   15.80   17.10
   4  -2  11    3.20    5.80
   4   2  12   19.80   13.00
   4   2  12   49.50   16.70
   4  -2  12   56.39   14.60
   4   2  13   -5.30    9.20
   4   2  13    6.00   10.50
   4  -2  13   -2.60    7.90
  -4   3  14    9.90    9.40
   4   3 -14  -15.30   19.60
   4  -3 -14   -0.50   10.10
  -4   3  13   52.89   15.80
  -4   3  13   67.99   32.30
   4  -3 -13   53.49   15.10
   4   3 -12   73.19   24.10
   4   3 -12  142.09   25.00
  -4   3  12  112.29   26.10
  -4  -3  12  117.59   13.70
   4  -3 -12  125.19   12.60
   4  -3 -12  114.79   23.00
  -4  -3  12  124.69   11.00
  -4   3  11   30.10   21.40
   4   3 -11    9.20   18.30
  -4   3  11   -2.90   35.80
  -4   3  11   15.40   20.70
   4  -3 -11    3.50    7.90
   4  -3 -11    3.40    8.90
   4  -3 -11   12.20   22.20
  -4  -3  11    0.10    7.00
  -4  -3  11    0.60    5.70
  -4   3  10  174.68   33.20
   4   3 -10  190.18   31.80
  -4   3  10  138.89  127.29
   4   3 -10  120.99   33.40
  -4   3  10  127.19   29.40
  -4  -3  10   29.50  103.19
   4  -3 -10  153.48   25.50
  -4  -3  10  155.08   13.80
  -4  -3  10  158.08   12.50
   4  -3 -10  149.79   14.20
   4  -3 -10  -22.90  120.09
   4  -3 -10  157.18   13.80
  -4   3   9   60.79   28.10
  -4   3   9   91.69   26.20
  -4   3   9   92.39   15.70
  -4   3   9  -65.49   93.09
   4   3  -9   32.20   25.90
  -4   3   9  107.79   26.80
   4  -3  -9   63.09   11.40
  -4  -3   9   57.09   10.90
   4  -3  -9  -84.89   90.29
  -4  -3   9   59.69    8.00
  -4  -3   9   32.30   85.59
  -4  -3   9   84.09   74.79
   4  -3  -9   55.49    9.10
   4   3  -8   59.49   28.90
  -4   3   8   88.69   27.40
  -4   3   8   73.09   12.90
   4   3  -8   61.59   25.70
  -4   3   8   64.39   28.50
  -4   3   8   59.59   24.20
  -4  -3   8   54.99    7.60
   4  -3  -8  102.39   64.49
   4  -3  -8   72.49    8.00
  -4  -3   8   33.90   64.29
  -4  -3   8   63.39   11.70
  -4  -3   8    3.60   53.99
   4  -3  -8   66.39   11.10
  -4   3   7  205.58   34.30
   4   3  -7  221.88   44.70
   4   3  -7  186.98   35.50
  -4   3   7  105.99   63.29
  -4   3   7  213.18   44.70
  -4   3   7  264.97   19.80
  -4   3   7  251.77   39.50
   4  -3  -7  254.27   16.90
   4  -3  -7  258.17   57.99
  -4  -3   7  244.68   52.79
  -4  -3   7  294.67   20.40
  -4  -3   7  286.27   72.39
   4  -3  -7  258.87   20.90
  -4  -3   7  270.57   16.90
   4   3  -6  255.37   61.39
  -4   3   6  296.47   22.30
  -4   3   6  349.47   35.90
  -4   3   6  362.76   64.59
  -4   3   6  392.66   43.40
   4   3  -6  297.87   38.70
   4  -3  -6  246.78   53.09
  -4  -3   6  303.97   67.29
  -4  -3   6  305.87   24.30
  -4  -3   6  335.37   20.30
  -4  -3   6  312.87   52.29
   4  -3  -6  314.57   20.40
  -4   3   5  165.38   28.40
  -4   3   5  192.78   40.80
  -4   3   5  258.57   52.99
   4   3  -5  165.58   41.20
  -4   3   5  177.88   13.90
   4   3  -5  198.38   31.30
  -4  -3   5  221.58   55.29
   4  -3  -5   76.09   42.60
   4  -3  -5  147.69   34.20
  -4  -3   5  171.28   39.10
  -4  -3   5  164.78   12.10
  -4   3   4  603.64   48.90
   4   3  -4  622.54   62.69
  -4   3   4  607.44   39.40
   4   3  -4  637.64   51.49
  -4  -3   4  660.03   37.60
  -4  -3   4  600.14   67.99
   4  -3  -4  658.23   53.69
  -4  -3   4  677.53   56.59
   4  -3  -4  536.35   72.79
  -4  -3   4  679.53   38.80
   4  -3  -4  593.74   37.70
  -4   3   3  211.88   15.50
   4   3  -3  215.08   32.20
  -4   3   3  288.27   47.30
  -4   3   3  168.98   27.10
  -4  -3   3  208.38   15.70
  -4  -3   3  238.78   51.19
   4  -3  -3  225.08   45.90
  -4  -3   3  215.48   14.10
   4  -3  -3  240.08   28.00
  -4   3   2 1071.69   66.39
  -4   3   2 1120.99   83.09
   4  -3  -2 1066.39   87.69
  -4  -3   2 1088.39   64.79
  -4  -3   2 1071.49   79.19
   4  -3  -2 1232.18   72.09
  -4   3   1  163.98   13.60
   4   3  -1  198.08   39.50
   4  -3  -1  138.69   35.40
   4  -3  -1  208.78   22.00
  -4  -3   1  237.88   35.80
  -4  -3   1  197.48   14.50
  -4  -3   1  203.98   12.60
   4   3   0  487.85   54.59
  -4   3   0  507.95   31.60
  -4  -3   0  512.55   51.39
   4  -3   0  501.65   36.90
  -4  -3   0  484.65   32.60
   4  -3   0  500.65   60.39
  -4  -3   0  541.45   30.40
  -4   3  -1  760.62   40.60
   4   3   1  658.73   61.89
  -4  -3  -1  630.54   39.00
   4  -3   1  538.95   67.29
  -4  -3  -1  615.34   41.60
  -4  -3  -1  636.54   62.79
   4  -3   1  713.43   47.00
  -4   3  -2  125.89   10.20
   4   3   2  110.29   27.60
   4   3   2   91.89   25.20
   4   3   2   83.39   34.80
   4  -3   2   88.29   40.10
  -4  -3  -2  122.99   12.00
  -4  -3  -2  116.49    8.70
  -4  -3  -2  119.79   38.70
   4   3   3  375.66   52.69
   4   3   3  362.56   40.70
   4   3   3  350.56   40.20
  -4  -3  -3  424.66   24.20
  -4  -3  -3  407.56   27.90
  -4  -3  -3  409.36   61.99
   4  -3   3  412.56   38.90
   4   3   4  218.08   34.80
   4   3   4  231.48   51.09
   4   3   4  219.78   32.70
   4  -3   4  232.18   16.50
   4  -3   4  251.17   36.70
  -4  -3  -4  247.48   17.80
  -4  -3  -4  215.88   19.00
  -4  -3  -4  240.88   15.20
  -4  -3  -4  256.77   55.79
   4   3   5   32.70   22.10
   4   3   5    8.70   21.00
   4   3   5   32.50   51.99
  -4  -3  -5   25.40   10.50
  -4  -3  -5  -52.99   58.09
  -4  -3  -5   45.00    7.90
  -4  -3  -5   33.00    6.20
   4  -3   5   33.00    5.50
   4  -3   5   32.60   30.50
  -4   3  -6  189.48   28.60
  -4   3  -6  168.88   43.10
   4   3   6  166.08   31.60
   4   3   6  175.28   44.60
   4   3   6  163.58   31.20
  -4  -3  -6  287.97   81.79
  -4  -3  -6  166.88   13.10
   4  -3   6  190.68   20.90
  -4  -3  -6  173.88   18.00
   4  -3   6  173.38   12.50
   4  -3   6  188.88   43.90
  -4  -3  -6  173.38   15.00
   4   3   7  137.09   32.10
   4   3   7  168.28   30.90
   4   3   7  189.38   84.39
   4   3   7  220.98   52.39
  -4   3  -7  164.28   28.20
  -4   3  -7  174.58   38.70
   4   3   7  208.28   35.30
  -4  -3  -7  111.89  100.49
  -4  -3  -7  162.28   13.40
   4  -3   7  119.69   49.99
  -4  -3  -7  148.89   19.70
   4  -3   7  171.08   12.20
  -4  -3  -7  160.18   14.70
   4  -3   7  180.88   17.50
   4   3   8  133.19   42.60
   4   3   8   88.39   25.40
  -4   3  -8  104.29   25.50
   4   3   8   97.69   27.20
   4   3   8  100.39  103.09
   4   3   8   82.79   24.00
  -4   3  -8   94.49   30.50
  -4  -3  -8  105.49   10.80
  -4  -3  -8  108.99   11.50
   4  -3   8   80.49    8.60
   4  -3   8  103.89   12.90
  -4  -3  -8   62.19   20.70
   4  -3   8  -15.70   61.69
   4   3   9   97.89   27.80
   4   3   9   44.30   24.20
   4   3   9   68.79   25.70
  -4   3  -9  100.39   19.30
  -4  -3  -9   73.49   13.60
   4  -3   9   90.49   11.90
  -4  -3  -9   98.29   11.10
   4  -3   9   95.69   95.09
   4  -3   9   95.09    8.90
   4   3  10   67.59   18.90
   4   3  10   62.79   21.30
   4   3  10   54.39   22.50
   4  -3  10   76.59   10.40
   4  -3  10   66.99    8.80
  -4  -3 -10   98.79   12.90
  -4   3 -11   85.49   22.60
   4   3  11   43.10   21.30
   4  -3  11   95.49   24.30
   4  -3  11   64.49   10.90
  -4  -3 -11  101.69   23.60
   4  -3  11   84.59    9.60
   4   3  12   21.50   12.60
  -4   3 -12    0.70   14.10
   4   3  12   34.10   11.90
   4  -3  12   18.80    5.50
   4  -3  12   13.40   10.90
  -4   4  13   32.60   13.70
   4   4 -13   12.20   22.30
   4  -4 -13   16.20   11.00
   4   4 -12    0.60   10.40
  -4   4  12   14.10   15.20
  -4   4  12   18.10   31.10
  -4   4  12   18.80   13.20
   4   4 -12    4.50   20.30
   4  -4 -12   35.70   15.20
  -4  -4  12    7.90    4.50
   4  -4 -12    9.00    5.70
  -4  -4  12   -4.30    6.80
   4  -4 -12   11.90   14.30
   4   4 -11   82.69   26.20
  -4   4  11   96.19   25.90
  -4   4  11  103.29   21.10
  -4   4  11  106.49   26.90
   4   4 -11  144.49   25.70
  -4  -4  11   75.99    9.80
   4  -4 -11   97.59   11.80
  -4  -4  11   97.09   10.50
   4  -4 -11  126.49   21.70
   4  -4 -11  101.99   11.40
   4   4 -10   34.00   25.20
  -4   4  10   35.90   20.00
   4   4 -10   94.19   21.90
  -4   4  10   52.69   21.30
  -4  -4  10   78.59   10.80
   4  -4 -10   90.39   22.50
   4  -4 -10   69.19   10.10
   4  -4 -10   74.29   12.40
  -4  -4  10   80.29    8.70
   4   4  -9  -27.50   22.80
   4   4  -9   24.30   20.00
  -4   4   9   29.40   21.40
  -4   4   9   37.20   22.20
  -4   4   9   25.40   21.90
  -4  -4   9   40.20   79.99
   4  -4  -9  193.38  102.69
   4  -4  -9   19.10    7.60
  -4  -4   9   23.60    6.00
  -4  -4   9   22.10    7.50
   4  -4  -9   26.90    6.70
  -4   4   8   95.49  127.19
   4   4  -8  164.18   44.70
  -4   4   8  111.89   18.60
  -4   4   8  159.68   30.30
  -4   4   8  113.19   37.20
  -4   4   8  158.88   36.40
   4   4  -8  117.79   32.60
   4  -4  -8  121.39   14.90
  -4  -4   8   64.99   94.79
   4  -4  -8  140.89   11.90
  -4  -4   8  154.68   14.90
   4  -4  -8  188.18   81.99
  -4  -4   8  135.59   11.40
  -4  -4   8   93.89   65.29
   4   4  -7  -12.20   26.30
  -4   4   7    1.20   10.80
  -4   4   7   39.10   26.40
  -4   4   7 -110.69   99.79
  -4   4   7   -3.10   25.40
  -4   4   7   16.60   19.90
  -4   4   7   32.10   21.90
   4   4  -7   18.00   26.10
   4  -4  -7   -1.30   10.30
  -4  -4   7  -30.00   77.99
   4  -4  -7    2.00    5.20
  -4  -4   7  -13.20   50.49
   4  -4  -7  174.98   64.49
  -4  -4   7   10.00    5.30
  -4  -4   7    3.90    9.20
   4   4  -6  374.56   49.50
  -4   4   6  321.67   44.80
  -4   4   6  405.26   94.49
   4   4  -6  276.27   39.50
  -4   4   6  286.97   36.30
  -4   4   6  266.67   38.80
  -4   4   6  287.07   39.30
  -4   4   6  278.97   23.90
   4  -4  -6  324.17   20.40
  -4  -4   6  360.56   82.99
  -4  -4   6  318.07   20.10
   4  -4  -6  354.96   69.29
  -4  -4   6  365.16   61.09
  -4   4   5  217.38   40.60
  -4   4   5  267.37   31.00
  -4   4   5  234.38   42.20
  -4   4   5  233.98   18.70
   4   4  -5  301.67   71.89
  -4   4   5  223.48   36.60
   4   4  -5  144.79   33.30
  -4   4   5  192.98   77.59
  -4  -4   5  222.98   15.20
   4  -4  -5  216.58   15.60
  -4  -4   5  344.47   81.19
  -4  -4   5  137.69   42.50
   4  -4  -5  225.88   46.40
  -4   4   4  105.09   27.10
  -4   4   4   76.09   26.10
  -4   4   4   78.99   11.00
  -4   4   4  147.99   70.69
  -4   4   4  109.29   36.50
   4   4  -4  100.39   27.60
  -4   4   4   77.19   29.70
  -4  -4   4   40.60   32.70
  -4  -4   4   90.59    8.70
  -4  -4   4  104.49   56.89
   4  -4  -4   90.39   33.90
  -4   4   3  466.05   42.20
  -4   4   3  417.36   30.00
   4   4  -3  422.76   43.70
  -4  -4   3  483.65   30.90
  -4  -4   3  383.96   76.49
  -4  -4   3  444.16   27.70
   4  -4  -3  544.15   46.80
  -4  -4   3  478.65   52.29
  -4   4   2   50.89    8.80
   4   4  -2   69.09   26.20
  -4   4   2   68.29   21.50
  -4  -4   2   60.89   11.30
  -4  -4   2   10.10   31.50
  -4  -4   2   52.99   10.00
   4  -4  -2   72.49   21.90
   4   4  -1  203.38   31.60
  -4   4   1  257.07   31.90
  -4   4   1  211.68   16.60
  -4  -4   1  244.68   45.70
  -4  -4   1  212.48   18.50
   4   4   0  401.36   41.30
  -4   4   0  409.36   38.30
   4   4   0  331.27   46.60
  -4   4   0  386.66   25.50
   4   4   0  395.66   63.19
  -4  -4   0  354.96   27.00
  -4  -4   0  374.26   23.10
  -4  -4   0  343.87   53.59
  -4   4  -1   72.79   10.00
   4   4   1   64.49   27.50
   4   4   1   86.99   23.40
  -4   4  -1   75.99   22.70
   4   4   1  129.39   48.70
  -4  -4  -1   73.29    7.30
  -4  -4  -1   61.99   11.60
   4  -4   1   97.39   20.90
  -4  -4  -1   92.29   40.30
   4   4   2  298.77   41.80
   4   4   2  312.57   36.30
   4   4   2  362.16   62.19
  -4  -4  -2  337.67   26.10
   4  -4   2  309.37   36.30
  -4  -4  -2  348.67   20.70
  -4  -4  -2  378.76   62.79
  -4   4  -3   44.00   28.90
  -4   4  -3   14.10   21.60
   4   4   3   84.49   54.79
   4   4   3  -19.70   29.40
  -4  -4  -3   -7.60   49.80
   4  -4   3    9.00   25.20
  -4  -4  -3   18.20   10.50
  -4  -4  -3   22.60    4.50
   4   4   4  244.48   48.80
  -4   4  -4  338.37   38.00
   4   4   4  302.77   39.30
  -4   4  -4  271.37   47.50
   4   4   4  367.76   78.09
   4   4   4  308.97   39.00
  -4  -4  -4  342.97   26.50
  -4  -4  -4  351.36   80.49
   4  -4   4  332.67   46.00
   4  -4   4  339.57   21.70
  -4  -4  -4  344.17   20.70
   4   4   5  198.18   36.60
  -4   4  -5  222.88   31.20
   4   4   5  212.78   35.20
   4   4   5  207.18   80.79
   4   4   5  186.18   30.60
  -4   4  -5  210.18   36.80
  -4  -4  -5  232.48   17.50
   4  -4   5  151.18   43.00
  -4  -4  -5  199.38   22.30
  -4  -4  -5  182.88   14.30
  -4  -4  -5  272.07   78.79
   4  -4   5  218.08   14.70
   4   4   6   26.70   81.99
   4   4   6   33.70   22.60
  -4   4  -6   21.50   18.20
   4   4   6   44.30   22.50
   4   4   6   29.50   35.30
  -4   4  -6    6.30   26.90
  -4  -4  -6   29.90   16.50
   4  -4   6   63.39   44.40
  -4  -4  -6   40.00    8.60
  -4  -4  -6   15.90   87.19
   4   4   7  202.98   37.20
  -4   4  -7  146.09   35.50
   4   4   7  154.68   30.70
   4   4   7  149.29   29.50
  -4   4  -7  203.58   27.80
  -4  -4  -7  192.88   15.60
   4  -4   7  188.48   19.00
  -4  -4  -7  149.09  119.39
   4  -4   7   33.10   54.49
  -4  -4  -7  180.68   14.10
   4  -4   7  191.38   12.90
   4   4   8   -6.80   19.00
  -4   4  -8  -14.40   18.20
   4   4   8   -9.00   22.30
  -4   4  -8    9.30   13.90
  -4  -4  -8   10.50    5.70
   4  -4   8   13.50    4.60
   4  -4   8   -1.90   72.19
  -4  -4  -8   11.80    7.80
   4   4   9   50.59   18.90
   4   4   9   13.70   17.90
   4   4   9   67.49   20.80
   4   4   9    9.20   35.10
  -4   4  -9   66.99   18.90
   4  -4   9   53.69    7.10
  -4  -4  -9   48.30    8.50
  -4  -4  -9   46.70    9.00
   4  -4   9   45.80    8.10
   4   4  10   25.40   19.50
   4   4  10   65.79   19.60
   4   4  10   66.69   19.50
  -4  -4 -10   76.19    9.50
   4  -4  10   74.69    8.40
   4  -4  10   87.39   10.10
   4   4  11    8.30   18.50
  -4   4 -11   17.20   10.80
   4   4  11   15.50   10.50
   4   4  11  -10.00   14.30
   4  -4  11   22.50    7.10
   4  -4  11   27.90   14.90
  -4  -4 -11   25.60   14.10
   4  -4  11   10.30    7.00
  -4   5  12    0.40    8.20
  -4   5  12   -1.70    7.60
   4  -5 -12   17.80    5.10
  -4  -5  12   17.60    3.90
   4  -5 -12    6.30   11.40
   4   5 -11   31.60   23.20
  -4   5  11   53.89   14.50
  -4   5  11   90.09   19.00
  -4   5  11   43.40   15.10
  -4  -5  11   71.19    7.80
  -4  -5  11   60.79    8.70
   4  -5 -11   64.19    8.90
   4  -5 -11   75.79    8.70
  -4   5  10   44.20   19.30
   4   5 -10   40.00   24.00
  -4   5  10   22.10   18.60
   4   5 -10   15.00   13.10
  -4   5  10   12.30   14.30
   4  -5 -10   61.29    9.00
   4  -5 -10   47.10    8.90
  -4  -5  10   42.80    8.30
   4  -5 -10   16.40   13.80
  -4  -5  10   43.00    7.20
   4   5  -9   41.30   18.40
  -4   5   9   27.20   17.20
   4   5  -9   33.50   25.80
  -4   5   9   26.40   16.40
  -4  -5   9   55.49    7.30
   4  -5  -9   45.00    8.30
   4  -5  -9   62.49    8.90
  -4  -5   9   51.59   10.30
  -4   5   8   -1.20   17.20
  -4   5   8   15.50   18.40
   4   5  -8    4.40   18.60
  -4   5   8   18.00   18.00
   4   5  -8  -15.50   22.90
   4  -5  -8    7.70    5.80
  -4  -5   8    6.90    5.10
  -4  -5   8   12.20    7.90
   4  -5  -8   12.50    7.60
  -4   5   7   88.69   22.40
   4   5  -7   63.89   29.10
  -4   5   7  113.59   26.20
   4   5  -7  131.69   36.40
  -4   5   7  131.49   30.10
   4  -5  -7  122.49   17.80
  -4  -5   7  142.89   15.50
   4  -5  -7  199.48   89.19
   4  -5  -7  127.99   11.30
  -4  -5   7   45.20   71.59
  -4  -5   7  133.59   10.80
  -4   5   6   31.70   15.60
   4   5  -6   26.90   28.30
  -4   5   6   58.79   24.00
  -4   5   6   70.19   22.10
  -4   5   6   20.60   28.90
   4   5  -6   82.39   31.00
  -4   5   6   67.79   21.40
   4  -5  -6   55.99    9.40
  -4  -5   6   50.99   62.89
   4  -5  -6  181.38   69.59
  -4  -5   6   78.69    8.40
  -4  -5   6  117.59  139.39
  -4   5   5  172.58   37.30
   4   5  -5  191.08   39.30
  -4   5   5  239.48   52.29
  -4   5   5  145.99   20.00
  -4   5   5  172.58   30.90
  -4  -5   5  127.99   52.09
   4  -5  -5  178.88   61.59
  -4  -5   5  202.18   13.90
  -4  -5   5   60.69  100.29
  -4   5   4  132.89   27.00
  -4   5   4  102.79   16.30
  -4   5   4   92.59   24.90
  -4  -5   4  115.59   10.10
  -4  -5   4  106.49   90.79
  -4  -5   4   13.20   53.39
  -4   5   3   22.80   19.40
  -4   5   3   -9.50   11.10
   4   5  -3    5.20   23.60
  -4   5   3   30.40   21.50
  -4   5   3   44.90   21.70
  -4  -5   3  -56.59   45.40
  -4  -5   3    6.00   86.09
   4  -5  -3   11.90   39.70
  -4  -5   3   -0.70    5.10
  -4   5   2  182.58   38.30
  -4   5   2  259.27   37.70
  -4   5   2  178.68   18.70
   4   5  -2  198.28   33.60
  -4   5   2  199.68   29.10
  -4  -5   2  188.78   48.90
  -4  -5   2  190.28   14.10
   4  -5  -2  244.88   41.10
  -4  -5   2  244.18   93.19
   4   5  -1   -5.80   20.30
  -4   5   1   34.10   24.30
  -4   5   1   12.70   39.30
  -4   5   1   19.70   23.50
  -4   5   1    5.00   12.20
  -4   5   1    1.70   18.70
  -4  -5   1   11.20   15.50
  -4  -5   1    1.70    5.20
  -4  -5   1  -29.00   44.00
   4   5   0   36.30   22.50
  -4   5   0   -4.20   19.80
  -4   5   0   12.80   23.30
  -4   5   0   67.79   23.40
  -4   5   0  -10.50   30.60
  -4  -5   0   50.39   47.80
  -4  -5   0   28.20   15.10
  -4  -5   0   56.79    7.30
   4   5   1   89.59   27.70
   4   5   1  126.39   31.50
  -4   5  -1   98.39   31.30
   4   5   1  148.89   73.79
  -4   5  -1  133.79   26.20
  -4   5  -1  114.79   28.90
  -4  -5  -1  138.79   54.99
  -4  -5  -1   80.39   17.60
  -4   5  -2   38.90   20.60
   4   5   2    0.10   78.29
   4   5   2   10.50   24.40
  -4   5  -2  -20.10   28.30
   4   5   2   -6.00   20.20
  -4  -5  -2   11.30   14.70
  -4  -5  -2    3.60    4.70
   4   5   3  133.99   31.40
   4   5   3   58.69   34.90
  -4   5  -3  142.29   35.30
  -4   5  -3  147.69   41.10
   4   5   3   96.89   29.40
   4   5   3   74.29   81.49
  -4  -5  -3  113.29   21.30
   4  -5   3  152.38   38.40
  -4  -5  -3   50.49   66.99
   4   5   4   -5.90   25.00
  -4   5  -4   47.80   26.60
  -4   5  -4    9.00   18.00
   4   5   4   -2.60   96.39
   4   5   4   27.40   20.90
   4   5   4   14.80   22.30
  -4  -5  -4   18.20    5.30
  -4  -5  -4  -45.30   71.09
   4  -5   4   13.50   40.20
  -4  -5  -4   20.70   16.70
  -4  -5  -4   14.40    7.60
  -4   5  -5  189.88   29.30
   4   5   5  135.39   30.70
  -4   5  -5  143.39   36.00
   4   5   5  168.28   36.90
  -4  -5  -5  201.68   16.70
  -4  -5  -5  150.98   89.29
   4  -5   5  202.58   14.60
  -4  -5  -5  196.08   14.00
   4  -5   5  209.78   52.09
  -4   5  -6  210.08   26.70
  -4   5  -6  174.28   33.80
   4   5   6  165.18   33.50
   4  -5   6  164.28   60.99
   4  -5   6  182.68   13.00
  -4  -5  -6  163.58   13.70
  -4  -5  -6  216.98  117.19
   4   5   7   26.90   20.70
  -4   5  -7   46.80   15.50
   4   5   7   51.79   22.50
   4   5   7    4.50   17.80
   4  -5   7   41.80   10.70
   4  -5   7   40.70    7.00
  -4  -5  -7   52.79    9.70
  -4  -5  -7   47.50    8.40
   4   5   8   56.39   18.90
  -4   5  -8   31.40   15.20
   4   5   8   39.40   18.90
   4  -5   8   27.70    6.70
   4   5   9    4.90   12.50
  -4   5  -9   20.00   11.60
   4   5   9   24.10   15.30
   4  -5   9   46.40    9.10
  -4  -5  -9   41.70    7.30
  -4  -5  -9   25.50    7.80
   4  -5   9   26.00    5.30
   4   5  10   -9.60   12.20
  -4   5 -10   -2.30    7.70
   4   5  10   -3.50    9.00
   4  -5  10   -3.00    4.60
  -4   6  10    0.10    7.80
  -4   6  10   -0.60    8.70
  -4   6  10   -6.00   10.00
  -4  -6  10    3.50    3.70
   4  -6 -10   -2.50    4.50
  -4   6   9  -12.80    8.80
  -4   6   9    4.40   10.50
  -4   6   9    0.80   12.50
   4   6  -9   13.30   22.90
   4  -6  -9   14.80    6.10
   4  -6  -9   -0.10    6.10
  -4  -6   9   12.60    5.00
  -4  -6   9    5.00    4.60
   4  -6  -9    2.20   15.70
  -4   6   8   43.20   13.40
  -4   6   8   13.00   13.00
  -4   6   8   19.70   14.20
   4   6  -8   61.99   25.50
   4  -6  -8   24.80   27.60
  -4   6   7    3.30   15.30
   4   6  -7   10.80   23.80
  -4   6   7   10.50   24.40
   4   6  -7   -0.70   19.40
  -4  -6   7    3.40    7.00
  -4  -6   7    0.30    7.30
   4  -6  -7    5.90    6.20
   4  -6  -7    4.70   14.00
  -4   6   6   18.90   15.30
   4   6  -6   13.30   22.80
  -4   6   6   10.40   15.50
  -4   6   6   -0.30   15.60
  -4  -6   6    7.30   14.80
  -4  -6   6   25.00    5.80
   4  -6  -6   21.00    6.50
   4   6  -5   48.20   25.20
  -4   6   5  108.19   23.40
  -4   6   5  105.19   20.10
  -4  -6   5   72.59    9.30
   4  -6  -5   79.09   11.30
  -4   6   4   15.90   16.80
   4   6  -4  -13.30   22.00
  -4   6   4    3.10   16.30
  -4   6   4   11.10   17.60
  -4  -6   4   -1.70    5.70
  -4   6   3  130.79   28.80
  -4   6   3  125.09   28.00
  -4  -6   3   84.69   63.69
  -4  -6   3  118.49   11.00
  -4   6   2    1.70   20.20
  -4   6   2   12.10   17.30
  -4   6   2   22.20   18.80
   4   6  -2   19.80   23.30
  -4  -6   2  -68.39   63.29
  -4  -6   2   14.90    5.80
  -4   6   1    1.70   18.50
  -4   6   1   39.20   19.90
  -4   6   1    5.50   34.00
   4   6  -1   30.00   22.90
  -4  -6   1   80.49   64.69
  -4   6   0  148.89   29.30
  -4   6   0  165.58   59.59
   4   6   0  127.39   30.70
  -4   6   0  113.39   24.90
  -4  -6   0  120.49   67.09
   4   6   1   -7.20   19.90
  -4   6  -1   21.90   20.20
  -4   6  -1    3.30   29.00
  -4  -6  -1  -25.30   72.49
  -4  -6  -1   16.00    5.70
  -4   6  -2   44.20   18.60
   4   6   2   47.50   26.40
  -4   6  -2   53.79   25.70
   4   6   2   65.79   31.90
  -4  -6  -2   62.89    7.90
   4   6   3    3.20   17.80
  -4   6  -3   16.20   20.10
   4   6   3   16.80   21.70
  -4   6  -3    7.30   17.20
  -4  -6  -3    3.40    8.00
  -4  -6  -3   -8.40    5.00
   4   6   4   15.70   21.20
   4   6   4    4.10   17.50
  -4   6  -4   19.60   17.60
  -4  -6  -4    8.20    8.00
  -4  -6  -4   20.20    5.70
  -4   6  -5    9.00   17.10
   4   6   5   18.40   21.10
   4   6   5   -0.10   18.00
   4   6   5   32.20   17.50
  -4  -6  -5   18.70    5.70
   4  -6   5   44.40    8.20
  -4  -6  -5   29.60    7.90
   4   6   6   -7.90   17.10
   4   6   6   20.80   17.60
   4   6   6    2.00   14.80
  -4   6  -6    4.30   13.20
  -4  -6  -6    3.70    5.40
  -4  -6  -6    9.80    6.30
   4  -6   6    6.40    5.20
   4   6   7   17.90   15.00
   4   6   7   34.30   16.60
   4   6   7   -1.60   14.00
  -4   6  -7    2.20    9.70
  -4  -6  -7   40.10    7.60
   4  -6   7   20.30    9.40
  -4  -6  -7   20.70    5.30
   4  -6   7   23.70    5.60
   4   6   8    3.60   11.70
  -4   6  -8    9.30    8.00
   4   6   8   -6.80   10.10
   4   6   8   17.20   14.30
   4  -6   8   12.70    6.80
  -4   7   6   -2.90   13.00
   4   7  -6   39.90   20.30
  -4   7   6    5.30    9.80
  -4   7   6    3.10   15.50
  -4  -7   6   24.90    7.40
   4   7  -5   13.20   18.70
  -4   7   5   20.30   16.10
  -4   7   5    6.50    9.60
   4   7  -4   24.10   19.80
  -4   7   4    4.10   11.30
  -4   7   4   -4.00   14.40
  -4   7   3    2.80   12.50
   4   7  -3    3.30   18.60
  -4   7   2    1.70   16.40
   4   7  -2   40.80   20.60
  -4  -7   2   38.80    6.40
   4   7  -1   23.10   18.40
  -4  -7   1    2.90    6.00
   4   7   0    7.00   17.90
  -4  -7   0    1.80    5.40
   4   7   1   50.79   19.60
  -4  -7  -1   28.30    6.30
   4   7   2   19.50   16.20
  -4  -7  -2   24.60   14.10
  -4  -7  -2    5.10    5.80
  -4  -7  -3   63.19    9.10
  -4  -7  -3   51.29    9.00
   4   7   4   17.80   16.00
   4   7   4    4.40   22.60
  -4  -7  -4   13.20    6.80
   4   7   5   11.60   23.50
  -4   7  -5   17.40   12.60
   4   7   5    8.40   11.00
  -4  -7  -5   19.70    5.70
   5   0 -15   93.09   22.00
  -5   0  14  -12.30   19.40
   5   0 -14    8.10   15.70
   5   0 -13   -3.80   15.80
  -5   0  13    3.70   21.20
  -5   0  12   -7.50   41.30
   5   0 -12   15.80   17.90
  -5   0  12   19.20   23.30
  -5   0  11  289.87   62.89
  -5   0  11  153.18   92.09
   5   0 -11  166.08   27.20
   5   0 -10  199.18   29.60
  -5   0  10  121.09   72.99
   5   0  -9   -1.30   22.20
  -5   0   9    9.80   55.59
   5   0  -8  491.95   33.50
  -5   0   8  453.15   73.79
   5   0  -8  535.55   43.50
  -5   0   7  153.88   12.80
   5   0  -7  161.08   16.40
   5   0  -7  203.48   41.00
   5   0  -7  217.08   20.80
   5   0  -7  176.58   26.60
  -5   0   7  232.78   48.70
   5   0  -6  394.76   79.79
   5   0  -6  376.96   44.90
  -5   0   6  334.77   22.00
  -5   0   6  320.57   48.70
   5   0  -5  265.27   52.39
   5   0  -5  212.08   33.60
  -5   0   5  199.98   13.80
  -5   0   5  117.39   53.39
  -5   0   5  200.08   42.20
   5   0  -4  279.07   51.99
   5   0  -4  281.37   19.90
  -5   0   4  341.77   43.00
   5   0  -4  259.97   33.50
  -5   0   4  344.37   19.70
  -5   0   4  289.27   52.59
   5   0  -3 1145.29   78.69
  -5   0   3 1165.98   82.29
   5   0  -3 1177.28   81.49
  -5   0   3 1196.48   68.39
  -5   0   3 1089.79   85.99
  -5   0   2  123.19   33.80
   5   0  -2  112.89   21.80
  -5   0   2   97.99   26.10
  -5   0   2  122.19    8.90
  -5   0   2  117.99   28.10
   5   0  -2  154.88   29.60
   5   0  -1   41.50   13.20
  -5   0   1   67.59   30.80
   5   0  -1   19.10   20.10
  -5   0   1   42.20    4.90
  -5   0   1   51.89   23.30
  -5   0   0 1350.36   72.69
   5   0   0 1121.69   79.49
   5   0   0 1283.27   80.69
   5   0   0 1115.19   78.79
  -5   0   0 1271.87   92.59
   5   0   1   25.40   14.60
   5   0   1   49.50   17.80
  -5   0  -1   44.60    5.10
   5   0   1   40.10   21.20
  -5   0  -1   76.29   42.20
   5   0   1   33.90   14.50
   5   0   2  265.07   37.10
   5   0   2  365.36   36.30
   5   0   2  262.87   33.60
   5   0   2  312.27   32.20
  -5   0  -2  341.57   20.70
   5   0   3  788.92   62.89
  -5   0  -3  763.42   44.80
   5   0   3  700.83   57.69
   5   0   3  708.73   43.50
  -5   0  -4  447.46   27.50
   5   0   4  396.26   56.09
   5   0   4  409.06   26.00
   5   0   4  447.16   51.19
   5   0   5  378.16   66.89
   5   0   5  358.86   22.90
   5   0   5  353.56   24.90
  -5   0  -5  381.56   24.50
   5   0   5  373.56   61.39
  -5   0  -5  390.76   56.19
   5   0   5  394.56   42.20
   5   0   6   36.60    6.30
   5   0   6   23.10    7.20
   5   0   6    1.00   25.60
   5   0   7  349.07   24.30
   5   0   7  357.76   45.90
   5   0   7  336.27   45.50
   5   0   8  377.16   25.70
   5   0   8  371.46   48.90
   5   0   9  254.27   43.60
   5   0  10  102.49   27.10
   5   0  10   67.09   26.00
   5   0  11   17.60   16.70
   5   0  11    1.80   20.50
   5   0  12   10.60   11.00
   5   0  12   -3.10   17.10
   5   0  13   -0.20    8.30
   5   1 -15    1.20   13.00
  -5   1  15   13.20   13.20
   5  -1 -15   13.70   13.40
   5   1 -14   26.10   17.30
  -5   1  14   49.50   17.50
   5  -1 -14    8.90   13.10
  -5  -1  14   59.09   16.90
   5   1 -13   12.60   18.20
  -5   1  13   20.30   18.50
  -5  -1  13   -9.80   14.30
   5  -1 -13    6.70   15.20
  -5   1  12   27.80   23.10
   5   1 -12   49.70   22.10
  -5   1  12   11.20   36.60
   5  -1 -12   15.20   18.00
   5   1 -11  120.69   27.90
  -5   1  11  205.98   60.99
  -5   1  11   66.49   32.80
  -5  -1  11  191.48   93.99
   5  -1 -11  164.98   24.80
   5   1 -10   51.79   22.60
  -5   1  10   40.50   75.89
  -5   1  10   48.00   30.20
  -5   1  10   95.29   34.90
  -5  -1  10   51.99   10.10
   5  -1 -10   53.29   19.30
  -5  -1  10  -21.70   73.29
   5  -1 -10   42.70    9.10
  -5   1   9  289.87   75.19
   5   1  -9  279.37   32.70
   5   1  -9  288.57   41.60
  -5   1   9  370.36   59.09
  -5   1   9  240.68   56.09
  -5  -1   9  211.28   68.39
  -5  -1   9  278.57   19.60
   5  -1  -9  246.98   19.90
   5  -1  -9  300.27   36.00
  -5   1   8  115.39   11.60
   5   1  -8  111.09   28.10
  -5   1   8  114.59   57.09
  -5  -1   8   39.90   49.90
  -5  -1   8  117.09   12.00
   5  -1  -8  109.09   10.90
  -5  -1   8  102.29   10.30
   5  -1  -8  101.19   24.70
   5  -1  -8  112.59   12.60
  -5  -1   8   81.59  118.59
   5   1  -7  476.15   42.70
  -5   1   7  423.16   67.79
  -5   1   7  468.25   29.40
   5   1  -7  556.54   62.59
  -5  -1   7  466.95   28.70
  -5  -1   7  420.96   60.99
   5  -1  -7  467.95   79.19
  -5  -1   7  458.65   29.30
   5  -1  -7  425.56   29.90
   5  -1  -7  460.55   28.50
  -5  -1   7  370.26   73.19
   5  -1  -7  476.55   40.60
   5  -1  -7  458.55   64.59
   5   1  -6  987.90   77.19
  -5   1   6  861.21   79.49
  -5   1   6  938.81   53.99
  -5  -1   6  890.81   53.29
   5  -1  -6  799.22   75.49
  -5  -1   6  964.80   52.89
  -5  -1   6  890.01   80.69
  -5  -1   6  829.62   77.99
   5  -1  -6  693.93   78.79
  -5  -1   6  939.41   54.19
   5  -1  -6  876.01   52.89
  -5   1   5  217.78   44.60
  -5   1   5  162.98   12.30
  -5  -1   5  166.58   11.90
   5  -1  -5  196.18   37.40
  -5  -1   5  126.99   36.20
  -5  -1   5  218.98   39.50
  -5  -1   5  174.38   12.20
   5  -1  -5  169.98   12.20
   5  -1  -5  234.58   41.10
   5   1  -4  569.44   44.80
  -5   1   4  485.85   50.29
  -5   1   4  543.55   31.20
   5  -1  -4  427.76   52.49
  -5  -1   4  424.36   50.49
  -5  -1   4  510.85   30.80
  -5  -1   4  511.35   50.69
   5  -1  -4  466.75   48.80
  -5   1   3   93.39   25.30
   5   1  -3   47.20   13.40
  -5  -1   3   26.60   24.00
  -5  -1   3   46.60    5.20
  -5  -1   3   24.00   27.90
  -5  -1   3   81.59   27.10
   5  -1  -3   46.60   20.00
   5  -1  -3   49.60    6.60
   5  -1  -3   19.50   17.30
   5   1  -2 2022.90  148.99
   5   1  -2 2145.59  131.59
  -5   1   2 2287.37  126.09
  -5   1   2 2049.29  131.19
  -5  -1   2 2260.77  140.49
  -5  -1   2 2246.48  125.99
  -5  -1   2 2197.78  124.89
  -5  -1   2 1908.31  133.69
  -5  -1   2 2206.38  137.49
   5  -1  -2 2062.59  136.19
   5  -1  -2 2300.97  133.89
   5   1  -1  407.76   59.79
  -5   1   1  397.56   25.80
   5   1  -1  361.66   31.20
   5  -1  -1  434.36   39.60
  -5  -1   1  424.76   45.90
  -5  -1   1  451.95   26.10
   5  -1  -1  450.75   35.50
  -5   1   0  354.16   21.40
   5   1   0  268.57   49.20
   5   1   0  337.87   34.60
   5   1   0  347.37   27.40
   5  -1   0  365.56   31.70
   5  -1   0  312.47   35.40
  -5  -1   0  334.97   21.50
  -5  -1   0  312.67   20.40
  -5  -1   0  364.96   44.60
   5   1   1  331.47   51.09
  -5   1  -1  299.47   19.40
   5   1   1  290.57   23.70
   5   1   1  291.67   34.80
   5  -1   1  286.97   34.60
   5  -1   1  310.77   31.40
  -5  -1  -1  272.97   43.90
   5  -1   1  293.97   19.00
  -5  -1  -1  317.17   19.90
  -5   1  -2  365.36   21.40
   5   1   2  250.07   37.20
   5   1   2  339.67   30.70
  -5  -1  -2  297.97   49.30
  -5  -1  -2  339.17   21.80
   5  -1   2  338.27   35.30
   5  -1   2  314.27   20.50
  -5   1  -3  533.55   30.70
   5   1   3  438.86   49.90
   5   1   3  421.96   41.00
  -5  -1  -3  487.35   29.90
  -5  -1  -3  498.55   31.50
   5  -1   3  576.04   46.70
   5  -1   3  492.55   29.60
  -5  -1  -3  430.16   72.89
   5   1   4  645.94   63.89
  -5   1  -4  753.52   40.70
  -5  -1  -4  646.04   89.49
   5  -1   4  638.84   39.50
  -5  -1  -4  651.73   41.40
   5  -1   4  693.73   57.59
  -5  -1  -4  613.34   40.00
   5   1   5  101.79   25.80
   5   1   5  101.09   43.90
  -5   1  -5   28.00   36.80
  -5  -1  -5   63.29   10.40
  -5  -1  -5   62.89   11.60
  -5  -1  -5   71.39    9.50
   5  -1   5   71.59   13.30
   5  -1   5   72.79    7.10
   5   1   6  398.46   76.69
   5   1   6  484.45   47.20
   5  -1   6  502.45   32.40
  -5  -1  -6  507.85   33.40
  -5  -1  -6  526.95   32.20
   5  -1   6  491.75   73.79
   5   1   7   80.39   29.70
  -5   1  -7   79.69   17.40
   5   1   7   15.20   26.80
   5   1   7   66.29   32.90
   5   1   7   -2.80   71.19
   5  -1   7  133.39   67.49
   5  -1   7   45.10    8.20
   5  -1   7   42.90   32.90
   5  -1   7   40.10    7.10
   5   1   8  146.59   34.70
   5   1   8  176.98   31.90
  -5   1  -8  179.98   24.60
   5   1   8  200.28   37.50
   5  -1   8  146.49   14.50
   5  -1   8  137.59   12.80
   5  -1   8  202.28   36.80
   5   1   9   18.80   23.90
   5   1   9   74.19   28.10
   5   1   9  145.19   36.70
   5  -1   9   59.69   11.00
   5  -1   9   79.29   29.90
   5   1  10    4.70   19.40
   5   1  10   10.20   17.60
   5  -1  10    2.20   25.30
   5   1  11   95.39   24.90
   5   1  11   97.39   26.00
   5  -1  11  110.99   24.40
   5   1  12    1.10   14.10
   5   1  12    5.40   11.90
   5  -1  12   20.30   12.60
   5   1  13    2.70   11.10
   5   1  13    6.50    9.40
   5  -1  13   -3.60    7.20
   5   2 -15   12.80   15.50
  -5   2  15   33.50   13.70
   5  -2 -15   10.90   11.70
  -5  -2  15   61.29   16.20
  -5   2  14    9.80   12.20
   5   2 -14    2.50   14.10
  -5  -2  14   -2.00   10.90
   5  -2 -14    4.20   11.10
   5   2 -13   37.40   20.70
  -5   2  13    0.60   21.10
   5  -2 -13   14.30   14.50
  -5   2  12   59.29   22.20
   5   2 -12   35.00   24.20
  -5  -2  12   26.50    6.60
   5  -2 -12   34.40    9.10
   5  -2 -12   38.10   20.20
  -5   2  11   66.49   24.70
   5   2 -11    5.20   22.20
   5  -2 -11    4.20   17.00
  -5  -2  11    7.30   13.70
   5  -2 -11    8.90   13.70
   5  -2 -11    6.50    7.50
  -5  -2  11   15.80    5.80
  -5   2  10   90.99   93.69
   5   2 -10  180.98   34.00
   5   2 -10  121.69   31.40
  -5   2  10  142.09   29.50
  -5  -2  10   51.39   86.39
   5  -2 -10  155.68   14.30
   5  -2 -10  153.88   14.70
  -5  -2  10  158.28   13.60
   5  -2 -10  127.69   24.70
  -5  -2  10  142.59   13.00
   5   2  -9   86.39   25.00
  -5   2   9  211.08   85.19
  -5   2   9   76.69   27.90
  -5   2   9   63.89   37.60
  -5   2   9  107.89   31.00
   5   2  -9  114.89   32.70
  -5  -2   9  123.79   69.59
  -5  -2   9   70.09   81.69
   5  -2  -9  107.99   24.50
   5  -2  -9   95.69   96.39
   5  -2  -9  101.39   12.80
  -5  -2   9  100.99   10.10
  -5  -2   9  103.79   11.60
   5  -2  -9  114.39   11.10
   5   2  -8  125.29   33.80
  -5   2   8  167.08   43.20
  -5   2   8  132.39   33.90
  -5   2   8  125.89   14.00
   5   2  -8  177.18   36.80
  -5   2   8   86.39   65.39
  -5  -2   8  104.49   61.99
   5  -2  -8   92.69   68.69
  -5  -2   8  144.59   10.80
   5  -2  -8  169.48   27.90
  -5  -2   8  173.58   60.49
   5  -2  -8  136.59   11.70
   5  -2  -8  135.09   13.90
  -5  -2   8  139.29   16.40
  -5   2   7  279.47   34.10
   5   2  -7  255.37   33.70
   5   2  -7  215.68   54.49
  -5   2   7  352.56   71.39
  -5   2   7  252.97   18.80
  -5  -2   7  224.18   55.19
   5  -2  -7  251.07   56.59
  -5  -2   7  264.37   18.90
   5  -2  -7  248.98   19.40
  -5  -2   7  239.98   16.80
   5  -2  -7  256.97   17.20
  -5  -2   7  304.27   72.59
   5  -2  -7  278.47   29.90
   5   2  -6  219.08   32.60
  -5   2   6  174.78   52.69
  -5   2   6  194.48   33.40
   5   2  -6  268.27   44.70
  -5   2   6  212.68   16.20
   5  -2  -6  178.28   44.40
  -5  -2   6  254.07   52.29
  -5  -2   6  222.38   14.70
   5  -2  -6  218.48   18.80
   5  -2  -6  150.88   43.00
  -5  -2   6  205.88   51.89
  -5  -2   6  233.28   17.60
   5  -2  -6  229.98   15.00
  -5   2   5  834.72   73.49
   5   2  -5  771.92   68.89
   5   2  -5  720.13   59.29
  -5   2   5  789.82   48.60
   5  -2  -5  814.42   47.20
  -5  -2   5  810.92   67.19
  -5  -2   5  809.42   47.00
  -5  -2   5  768.52   74.49
   5  -2  -5  753.12   72.09
  -5  -2   5  837.32   47.80
  -5   2   4  153.38   12.10
   5   2  -4  213.58   34.90
  -5   2   4  140.19   36.60
   5  -2  -4  146.09   32.10
  -5  -2   4  158.78   12.10
   5  -2  -4  159.98   11.40
  -5  -2   4  160.98   10.80
  -5  -2   4  153.98   34.20
  -5  -2   4  119.19   38.70
   5  -2  -4  143.19   28.50
   5   2  -3 1425.76   94.19
  -5   2   3 1460.85   98.09
  -5   2   3 1408.56   86.39
  -5  -2   3 1523.45   86.19
  -5  -2   3 1541.85   85.09
   5  -2  -3 1583.14   95.49
   5  -2  -3 1362.86   85.09
   5  -2  -3 1395.16  101.89
  -5  -2   3 1474.05   99.69
  -5  -2   3 1434.16  106.99
   5  -2  -2  173.48   36.90
   5  -2  -2  132.29   15.20
  -5  -2   2  193.68   36.20
  -5  -2   2  160.68   11.70
  -5  -2   2  158.78   10.70
   5  -2  -2  165.08   23.60
   5   2  -1  215.58   35.00
  -5   2   1  187.58   12.60
  -5  -2   1  157.88   11.30
   5  -2  -1  143.89   30.20
   5  -2  -1  181.98   23.10
  -5  -2   1  167.08   12.80
  -5  -2   1  194.08   33.20
   5   2   0  728.33   61.49
  -5   2   0  742.83   43.60
  -5  -2   0  662.13   44.00
  -5  -2   0  819.02   62.79
   5  -2   0  595.24   62.49
   5  -2   0  779.72   51.89
   5   2   1  151.18   35.60
  -5   2  -1  152.68   11.10
   5  -2   1  164.18   24.80
  -5  -2  -1  235.18   43.50
   5  -2   1  137.29   29.60
  -5  -2  -1  135.69    9.90
  -5  -2  -1  136.79   11.30
   5  -2   1  135.79   11.60
  -5   2  -2  110.29    9.00
   5   2   2   92.09   34.80
   5  -2   2   95.49    9.00
   5  -2   2   68.69   20.90
   5  -2   2   51.69   31.10
  -5  -2  -2  100.59    7.70
  -5  -2  -2   99.59   10.20
  -5  -2  -2   59.39   37.60
   5   2   3  420.86   51.09
  -5   2  -3  455.75   28.20
   5   2   3  425.56   42.70
  -5  -2  -3  484.65   27.50
  -5  -2  -3  457.35   28.50
   5  -2   3  452.95   27.60
   5  -2   3  316.97   57.29
  -5  -2  -3  495.05   69.19
  -5  -2  -3  461.25   30.00
   5   2   4  172.08   29.60
   5   2   4  149.88   43.50
   5   2   4  199.18   48.20
   5  -2   4  220.28   14.30
  -5  -2  -4  209.98   17.20
  -5  -2  -4  212.88   16.30
   5  -2   4  272.97   40.10
  -5  -2  -4  221.78   14.40
  -5  -2  -4  265.87   64.59
   5   2   5  135.29   27.80
   5   2   5  226.28   58.49
   5   2   5  189.68   41.50
   5  -2   5  158.88   11.80
  -5  -2  -5  174.98   16.20
  -5  -2  -5  148.59   14.30
  -5  -2  -5   86.79   74.99
  -5  -2  -5  185.68   12.90
   5  -2   5  236.28   46.80
   5  -2   5  148.79   17.40
   5   2   6  188.48   45.50
   5   2   6  237.28   36.00
   5   2   6  292.87   69.99
  -5   2  -6  207.18   27.10
  -5   2  -6  117.69   42.20
   5   2   6  163.98   40.20
  -5  -2  -6  138.39  131.69
  -5  -2  -6  186.18   15.50
  -5  -2  -6  209.18   18.80
   5  -2   6  291.17   59.79
   5  -2   6  221.18   14.20
   5  -2   6  210.88   18.80
   5   2   7  166.48   32.60
   5   2   7   86.19   88.59
  -5   2  -7  133.69   23.60
   5   2   7  171.48   38.20
   5   2   7  169.48   42.50
  -5   2  -7  165.98   36.30
   5   2   7  101.59   25.50
   5  -2   7  137.19   14.20
  -5  -2  -7  128.59   13.10
  -5  -2  -7  121.39   13.10
   5  -2   7  123.69   10.10
   5  -2   7  100.09   59.69
  -5  -2  -7  108.59   22.30
  -5   2  -8  203.98   44.70
   5   2   8  130.09   31.70
   5   2   8  189.88   35.00
  -5   2  -8  126.19   28.40
   5   2   8   24.40  106.49
   5   2   8  185.58   42.70
  -5  -2  -8  192.28   15.60
   5  -2   8  168.38   15.10
   5   2   9   67.39   23.70
   5   2   9   38.90   21.50
  -5   2  -9   93.69   29.40
   5   2   9  107.49   26.60
   5  -2   9   85.79   11.10
   5  -2   9   95.09    9.40
  -5   2 -10   45.30   35.70
   5   2  10  137.59   26.40
   5   2  10  103.69   22.60
   5  -2  10   84.29   12.40
   5  -2  10  107.29   11.50
   5   2  11   57.79   30.20
   5  -2  11   31.80    6.50
   5  -2  11   24.80   16.70
   5   2  12   29.60   13.10
   5   2  12    7.30   10.30
   5  -2  12   24.40   11.60
   5   3 -14    6.90   15.80
   5  -3 -14   38.70   13.50
  -5  -3  14   33.70    9.80
  -5   3  13   -1.00   12.30
   5   3 -13    5.30   14.60
   5  -3 -13   -7.60   11.80
  -5   3  12   46.80   16.80
  -5   3  12  105.19   29.10
   5  -3 -12   79.19   11.10
   5  -3 -12   34.50   15.70
  -5  -3  12   67.99    8.70
  -5   3  11   73.89   25.10
   5   3 -11  114.09   34.20
  -5   3  11  129.19   28.30
  -5   3  11   73.89   24.00
   5   3 -11  181.88   28.10
  -5  -3  11  117.49   11.90
   5  -3 -11  132.39   13.50
  -5   3  10   93.59   28.40
  -5   3  10   69.09   25.90
   5   3 -10   36.80   25.00
  -5   3  10  109.29   25.70
   5   3 -10  107.09   24.50
   5  -3 -10  246.48  133.09
   5  -3 -10   93.29   24.20
  -5  -3  10   74.79    9.50
   5  -3 -10   82.19   10.60
  -5  -3  10   80.59   10.50
  -5  -3  10 -246.88  114.89
   5  -3 -10   55.39   11.70
  -5   3   9  249.08   35.80
  -5   3   9  167.58   44.00
   5   3  -9  321.37   43.60
  -5   3   9  199.68   44.50
  -5   3   9  230.58   24.10
  -5   3   9  283.37  118.99
   5   3  -9  296.37   40.00
   5  -3  -9  276.37   20.20
   5  -3  -9  319.37   32.80
  -5  -3   9  117.29   90.49
   5  -3  -9  191.98  118.39
  -5  -3   9  287.97   20.10
   5   3  -8  132.89   34.10
  -5   3   8  112.29   26.60
  -5   3   8   84.59   90.09
  -5   3   8   85.29   13.70
  -5   3   8  149.69   29.70
  -5   3   8  127.49   33.30
   5   3  -8  125.09   34.60
  -5  -3   8  164.58   64.79
   5  -3  -8   81.49   70.49
   5  -3  -8  127.19   13.90
  -5  -3   8  101.79    9.80
  -5  -3   8   91.89   12.60
  -5  -3   8  153.98   77.79
   5  -3  -8  104.99   10.20
  -5   3   7  241.58   32.60
   5   3  -7  360.66   46.40
   5   3  -7  204.28   36.40
  -5   3   7  262.47   47.10
  -5   3   7  192.38   79.49
  -5   3   7  257.77   20.70
  -5   3   7  222.28   37.60
  -5  -3   7  267.77   17.20
   5  -3  -7  260.97   22.20
  -5  -3   7  299.67   65.89
   5  -3  -7  258.57   17.50
   5  -3  -7  197.88   58.39
  -5  -3   7  315.97   79.29
  -5   3   6  173.38   62.99
  -5   3   6  281.27   33.10
   5   3  -6  243.78   36.40
  -5   3   6  254.47   20.00
   5  -3  -6  236.58   22.60
   5  -3  -6  277.07   17.70
  -5  -3   6  284.17   21.00
   5  -3  -6  250.37   50.89
  -5  -3   6  193.68   48.70
  -5  -3   6  287.87   17.60
  -5  -3   6  356.76   72.39
  -5   3   5   36.80   19.50
  -5   3   5   38.40    8.00
   5   3  -5   48.90   24.40
  -5   3   5   20.00   51.49
   5  -3  -5   34.50    6.00
  -5  -3   5   47.80   49.30
  -5  -3   5   10.30   32.40
  -5  -3   5   40.90    6.10
   5  -3  -5   28.50   33.10
  -5  -3   5   40.30   10.10
  -5   3   4  281.87   19.30
  -5   3   4  266.27   30.80
   5   3  -4  288.27   36.30
  -5   3   4  371.46   62.49
  -5  -3   4  216.08   53.99
   5  -3  -4  264.07   39.70
   5  -3  -4  239.98   17.30
   5  -3  -4  186.28   49.40
  -5  -3   4  261.67   18.40
  -5  -3   4  263.27   16.80
  -5  -3   4  235.98   43.10
   5   3  -3  212.48   31.90
  -5   3   3  227.58   16.60
  -5   3   3  201.48   29.00
   5  -3  -3  186.58   31.20
   5  -3  -3  298.27   57.89
   5  -3  -3  214.18   15.90
  -5  -3   3  225.08   42.20
  -5  -3   3  289.67   57.09
  -5  -3   3  231.28   16.40
  -5   3   2   46.80    7.20
  -5   3   2   36.20   17.70
   5   3  -2   43.50   23.50
   5  -3  -2   34.40   39.00
  -5  -3   2   40.10    5.70
  -5  -3   2   32.00    7.70
   5  -3  -2   63.09   21.50
  -5  -3   2   38.60   30.50
  -5   3   1  133.09   11.90
   5   3  -1  182.28   31.50
  -5   3   1  124.09   23.60
   5   3  -1  122.19   39.90
  -5  -3   1  158.38   13.10
   5  -3  -1  142.19   42.20
  -5  -3   1  164.28   10.60
  -5  -3   1  189.78   38.70
   5   3   0   50.19   23.30
  -5   3   0   30.40    6.20
   5   3   0   12.90   34.80
  -5   3   0   28.90   16.80
   5  -3   0    3.90   38.50
  -5  -3   0   34.00    7.80
   5  -3   0   30.20   20.00
  -5  -3   0   28.60    4.40
  -5  -3   0    8.30   33.30
   5   3   1  416.56   44.40
  -5   3  -1  450.55   27.50
   5   3   1  407.46   56.69
   5   3   1  459.65   43.20
  -5   3  -1  469.05   37.80
  -5  -3  -1  415.86   58.49
   5  -3   1  438.16   39.70
  -5  -3  -1  395.46   28.90
   5  -3   1  292.17   74.49
   5   3   2  177.98   47.70
   5   3   2  124.79   32.90
  -5   3  -2   99.89   24.20
  -5   3  -2   91.89    9.80
   5   3   2   91.09   24.60
   5  -3   2   98.39   10.80
  -5  -3  -2   82.59   11.40
   5  -3   2   97.69   25.50
  -5  -3  -2   97.99    8.00
  -5  -3  -2  112.79   44.90
   5  -3   2   69.09   49.70
  -5  -3  -2  100.39   13.10
   5   3   3  107.69   49.00
   5   3   3  125.99   30.00
   5   3   3  119.79   32.20
  -5  -3  -3  151.88   52.29
  -5  -3  -3  158.38   14.00
  -5  -3  -3  165.78   15.30
   5  -3   3  115.69   29.50
   5  -3   3  153.38   12.10
  -5  -3  -3  155.08   10.80
   5   3   4  559.94   76.59
   5   3   4  553.64   48.60
   5   3   4  582.24   50.79
   5  -3   4  531.65   33.40
  -5  -3  -4  505.45   37.20
  -5  -3  -4  553.64   33.40
   5  -3   4  550.04   55.89
  -5  -3  -4  561.14   89.29
  -5  -3  -4  586.04   34.40
  -5   3  -5   68.09   19.30
   5   3   5   16.80   22.10
   5   3   5   -1.50   31.80
  -5   3  -5   17.30   36.40
   5   3   5   66.79   63.09
  -5   3  -5    4.80   29.00
   5  -3   5   24.60   13.30
  -5  -3  -5    3.70   75.19
  -5  -3  -5   15.30    6.80
  -5  -3  -5   34.90   11.70
   5  -3   5   27.50    5.20
  -5  -3  -5   21.30    5.60
   5   3   6  129.59   76.89
   5   3   6  192.18   34.90
   5   3   6  155.48   31.70
  -5   3  -6  159.48   36.90
  -5   3  -6  193.18   25.90
   5   3   6  169.88   42.90
  -5  -3  -6  169.38   20.20
  -5  -3  -6  204.68   14.80
  -5  -3  -6  186.98   15.80
  -5  -3  -6  347.97  105.49
   5  -3   6  179.18   19.90
   5  -3   6  287.37   56.49
   5  -3   6  220.18   13.70
   5   3   7   48.20   21.90
   5   3   7   15.10   24.80
   5   3   7   59.89   45.90
  -5   3  -7   45.90   48.40
   5   3   7  -21.70   97.29
  -5  -3  -7   31.50    7.40
   5  -3   7   43.80    9.30
  -5  -3  -7   52.09   17.60
   5  -3   7   33.00   56.29
   5  -3   7   28.80    6.90
   5   3   8   87.99   25.10
   5   3   8   39.70   21.30
  -5   3  -8   70.29   24.40
   5   3   8   56.39   27.60
  -5   3  -8  124.19   22.40
   5   3   8   28.90   28.60
   5  -3   8  120.09   82.39
  -5  -3  -8   86.59   12.30
   5  -3   8   87.29    8.30
  -5  -3  -8   93.79   10.80
   5  -3   8   84.29   11.90
   5   3   9   56.49   20.80
   5   3   9   42.70   24.80
   5   3   9   38.30   20.20
   5  -3   9   68.79   11.90
  -5  -3  -9   65.49   11.00
   5  -3   9   56.69    7.80
   5   3  10    4.50   14.00
   5   3  10   -2.00   16.20
   5  -3  10    2.00    5.60
   5   3  11   24.60   13.00
  -5   3 -11   88.99   22.40
   5  -3  11   81.49   19.50
   5   3  12   -1.10   10.60
   5   3  12   12.70    9.20
   5  -3  12   16.70    9.80
   5   4 -13    8.30   17.10
  -5   4  13   22.90   10.10
   5  -4 -13    1.30   11.50
  -5   4  12   14.60   12.50
  -5   4  12   14.60   18.10
   5   4 -12    4.50   17.50
  -5   4  12   38.90   14.90
   5  -4 -12   30.70   14.80
  -5  -4  12   27.70    9.30
   5  -4 -12   12.60    6.00
  -5   4  11   16.70   16.70
   5   4 -11   24.00   20.40
  -5   4  11    3.40   15.50
   5  -4 -11    9.20   15.70
  -5  -4  11    3.30    4.70
   5  -4 -11   12.20    6.20
   5   4 -10   72.09   19.40
   5   4 -10   65.79   25.10
  -5   4  10   34.10   18.70
  -5   4  10   23.40   18.90
  -5   4  10   28.60   18.60
  -5  -4  10   59.19    8.50
  -5  -4  10   51.39    9.40
   5  -4 -10   54.29   10.50
   5  -4 -10   46.60   17.20
   5  -4 -10   48.00    8.90
  -5   4   9   12.10   20.10
   5   4  -9   22.90   23.80
  -5   4   9    1.80   18.80
   5   4  -9   16.70   20.70
  -5   4   9    9.90   18.40
   5  -4  -9   -8.00   17.70
  -5  -4   9   25.30   94.69
   5  -4  -9   53.39  107.29
   5  -4  -9    4.30    6.30
  -5  -4   9    4.30    5.10
  -5  -4   9    4.70    6.90
   5  -4  -9    0.80    6.90
  -5   4   8   26.20   21.10
   5   4  -8   52.69   25.10
   5   4  -8   11.50   25.20
  -5   4   8   20.60   14.70
  -5   4   8   42.00   24.50
  -5   4   8   67.39   22.00
   5  -4  -8   64.69   12.40
   5  -4  -8   58.69   81.89
   5  -4  -8   35.90    7.10
  -5  -4   8   52.69   70.99
  -5  -4   8   36.80   99.79
  -5  -4   8   40.00    7.40
  -5  -4   8   31.10    8.30
   5   4  -7   64.69   27.30
   5   4  -7   68.49   26.80
  -5   4   7   58.49   22.90
  -5   4   7   81.89   26.90
  -5   4   7   67.29   15.00
  -5   4   7   57.49   22.10
  -5  -4   7   45.20   73.29
  -5  -4   7   63.59   12.50
   5  -4  -7   61.79   10.70
   5  -4  -7   50.59    9.90
   5  -4  -7   57.59   69.99
  -5  -4   7  -58.39   84.29
  -5   4   6  182.88   19.10
  -5   4   6  260.07   36.60
  -5   4   6  217.38   35.50
   5   4  -6  194.08   38.00
  -5   4   6  208.38   30.90
   5  -4  -6  211.98   15.60
  -5  -4   6  228.88   19.30
   5  -4  -6  207.78   58.49
  -5  -4   6   70.29   73.69
  -5  -4   6  237.58   15.10
  -5  -4   6  284.87   64.89
   5   4  -5  393.46   42.30
   5   4  -5  355.36   62.69
  -5   4   5  361.86   41.80
  -5   4   5  378.46   37.60
  -5   4   5  422.86   40.20
  -5   4   5  360.46   27.50
  -5  -4   5  373.56   93.69
   5  -4  -5  386.06   23.90
  -5  -4   5  383.66   23.60
   5  -4  -5  394.26   62.39
  -5  -4   5  309.77   60.89
  -5  -4   5  322.77   34.10
  -5   4   4  -27.10   21.60
  -5   4   4    7.10   18.00
   5   4  -4   11.10   24.50
  -5   4   4   13.10    9.00
  -5   4   4   24.40   22.90
  -5  -4   4    5.80    4.30
  -5  -4   4   10.50   36.00
   5  -4  -4   -3.10   34.50
  -5  -4   4   23.60   71.59
   5  -4  -4   17.40    6.80
   5   4  -3  172.38   44.30
  -5   4   3  234.18   33.00
  -5   4   3  225.08   18.40
  -5   4   3  238.98   35.60
  -5   4   3  234.78   28.80
   5  -4  -3  228.38   41.20
  -5  -4   3  192.98   44.00
  -5  -4   3  124.29   63.29
  -5  -4   3  219.78   19.20
  -5  -4   3  246.28   15.10
  -5   4   2   70.89   40.10
  -5   4   2   72.99   19.90
   5   4  -2   64.59   24.80
  -5   4   2   23.90   37.20
  -5   4   2   68.09   11.20
  -5  -4   2   68.09    7.40
  -5  -4   2   74.09   12.50
   5  -4  -2   91.99   28.30
  -5  -4   2   62.49   39.30
  -5   4   1  128.79   12.50
   5   4  -1  124.29   29.10
  -5   4   1  108.49   24.70
  -5  -4   1  154.98   43.30
  -5  -4   1  121.79    9.30
   5  -4  -1   96.89   25.70
  -5  -4   1  100.39   13.70
  -5   4   0  130.59   13.50
   5   4   0  133.59   28.60
   5   4   0   95.89   32.00
   5   4   0  141.09   53.29
  -5   4   0  160.88   37.80
  -5   4   0  119.29   24.80
  -5  -4   0  119.99   14.40
  -5  -4   0   58.99   41.80
   5  -4   0  114.59   26.80
  -5  -4   0  125.49    9.60
   5   4   1   66.99   54.39
   5   4   1   35.20   24.60
  -5   4  -1   57.99   11.30
  -5   4  -1   26.80   31.00
  -5   4  -1   70.09   24.10
  -5   4  -1   41.90   19.90
   5   4   1    2.90   25.50
   5  -4   1   45.60   24.50
  -5  -4  -1   63.19   12.30
  -5  -4  -1   46.90   46.90
  -5   4  -2  173.18   40.50
   5   4   2  231.98   32.80
  -5   4  -2  224.28   42.50
  -5   4  -2  187.18   31.90
  -5   4  -2  287.77   37.20
   5   4   2  128.79   57.69
  -5  -4  -2  214.78   14.80
  -5  -4  -2  284.07   63.59
   5  -4   2  297.37   38.90
  -5  -4  -2  209.68   20.30
  -5  -4  -2  234.68   18.90
   5   4   3   53.29   23.20
  -5   4  -3   23.50   19.40
  -5   4  -3   58.39   28.40
   5   4   3   13.20   37.60
   5   4   3   42.10   25.50
  -5   4  -3    3.70   25.10
   5   4   3   42.30   62.99
   5  -4   3    6.00   30.40
  -5  -4  -3   30.10   12.50
  -5  -4  -3  -64.39   60.09
  -5  -4  -3   28.80    8.10
  -5  -4  -3   25.90    4.90
   5  -4   3   20.50    7.80
   5   4   4   80.39   25.70
   5   4   4   54.39   33.70
  -5   4  -4  102.29   30.40
   5   4   4  256.27   79.89
   5   4   4  122.89   29.10
  -5   4  -4  151.88   29.00
  -5  -4  -4  151.98   12.70
  -5  -4  -4   86.59   69.49
   5  -4   4  133.79   11.50
  -5  -4  -4  115.49   17.50
  -5  -4  -4  136.69   10.40
   5  -4   4  197.68   42.90
   5   4   5  452.95  107.19
   5   4   5  451.75   45.80
  -5   4  -5  525.95   52.99
   5   4   5  522.45   47.20
  -5   4  -5  590.54   41.60
   5   4   5  412.96   52.89
  -5  -4  -5  339.57   99.69
  -5  -4  -5  457.65   36.90
  -5  -4  -5  514.75   31.90
   5  -4   5  465.25   68.39
   5   4   6  146.39   35.30
  -5   4  -6  141.89   37.40
   5   4   6  177.18   32.10
   5   4   6  173.28   33.10
  -5   4  -6  170.28   25.70
   5   4   6   -3.20  107.09
  -5  -4  -6  128.19  115.29
   5  -4   6  134.19   20.50
  -5  -4  -6  156.48   14.20
   5  -4   6  146.79   11.60
   5  -4   6  105.19   54.29
  -5  -4  -6  150.38   12.40
  -5   4  -7  117.39   26.00
   5   4   7  119.59   30.90
   5   4   7  109.59   28.90
  -5   4  -7  148.09   23.80
   5  -4   7  101.09    9.10
  -5  -4  -7  107.89   11.90
  -5  -4  -7   96.69   10.90
  -5  -4  -7  -21.80  147.99
   5  -4   7   39.90   67.09
   5  -4   7  110.79   14.70
  -5   4  -8   23.60   18.20
   5   4   8   55.49   20.70
   5   4   8   54.19   23.50
  -5   4  -8   92.99   19.90
   5   4   8   63.59   22.00
  -5  -4  -8   31.30    7.60
   5  -4   8   68.99   11.00
  -5  -4  -8   56.69    9.00
   5  -4   8   49.00    6.70
   5   4   9   -2.70   15.40
   5   4   9   -1.80   14.70
  -5   4  -9   14.90   18.80
  -5  -4  -9    6.20    5.90
   5  -4   9   12.00    6.30
  -5   4 -10   53.29   14.00
   5   4  10   53.49   14.30
   5  -4  10   63.29    8.60
   5  -4  10   56.99    8.60
   5   4  11    9.20   14.20
  -5   4 -11   20.50   10.00
   5   4  11    9.90    9.80
   5  -4  11    5.00    4.20
   5  -4  11    6.90   14.30
   5   5 -11    9.90   20.40
  -5   5  11   -2.10   11.40
  -5   5  11    1.40   10.20
  -5   5  11    8.00    9.30
  -5  -5  11    6.00    4.20
  -5  -5  11   12.80    6.40
   5  -5 -11    5.70    6.40
   5  -5 -11    5.90    8.90
   5  -5 -11    5.20   13.20
  -5   5  10   53.69   16.10
  -5   5  10   60.69   16.40
  -5   5  10   73.99   20.20
  -5  -5  10   73.49    8.70
  -5  -5  10   81.99    8.80
   5  -5 -10   71.89    9.80
   5  -5 -10   78.49    9.70
   5   5  -9   56.79   22.30
  -5   5   9   29.70   16.40
   5   5  -9   50.19   24.00
   5  -5  -9   34.90    7.40
   5  -5  -9   42.30   18.60
  -5  -5   9   40.00    7.70
  -5  -5   9   38.70    7.10
   5  -5  -9   46.60    7.50
  -5   5   8  151.58   28.40
   5   5  -8  136.59   30.40
  -5   5   8  103.79   23.70
  -5   5   8  110.99   24.30
  -5  -5   8  126.69   10.60
   5  -5  -8  106.89   24.90
   5  -5  -8  122.59   14.10
  -5  -5   8  122.49   13.10
   5  -5  -8  124.89   11.30
   5   5  -7   54.49   43.90
  -5   5   7   66.39   28.00
  -5   5   7   47.40   19.70
  -5   5   7   66.89   19.70
   5   5  -7  102.39   27.30
   5  -5  -7   65.79    9.10
   5  -5  -7   80.09   88.09
  -5  -5   7   59.29    8.00
  -5  -5   7   36.50   80.69
  -5   5   6    6.30   19.00
   5   5  -6   35.80   26.00
   5   5  -6   82.89   32.20
  -5   5   6   30.50   19.80
  -5   5   6   37.60   20.40
  -5  -5   6  120.49   68.49
   5  -5  -6   32.90    6.70
  -5  -5   6   14.60    5.40
   5  -5  -6  189.28   71.89
  -5  -5   6   29.90    9.50
  -5   5   5   16.40   18.30
   5   5  -5  -19.10   23.60
  -5   5   5    6.80   18.40
  -5   5   5   11.30   18.20
  -5   5   5   14.40   15.10
   5  -5  -5   51.09   59.49
  -5  -5   5  121.39  112.29
  -5  -5   5   29.10    5.60
  -5  -5   5   35.60   54.69
   5  -5  -5    9.20    6.60
  -5  -5   5   -6.00   14.70
  -5   5   4  433.56   39.20
  -5   5   4  407.86   31.90
  -5   5   4  505.65   64.49
   5   5  -4  351.26   46.10
  -5  -5   4  165.38  100.39
   5  -5  -4  245.28   60.39
  -5  -5   4  423.26   25.60
  -5   5   3    3.00   13.60
   5   5  -3   13.30   23.00
  -5   5   3   -9.10   18.30
  -5   5   3   16.80   18.90
  -5   5   3    1.30   19.40
  -5  -5   3   52.89   51.29
   5  -5  -3    1.10   48.30
  -5  -5   3   40.70   88.59
  -5  -5   3   17.30    8.30
  -5   5   2   63.09   37.20
   5   5  -2  156.08   32.70
  -5   5   2  114.49   19.00
  -5   5   2  132.19   24.90
  -5   5   2   85.49   23.70
  -5   5   2  110.99   25.30
  -5  -5   2  105.69    9.50
  -5  -5   2 -104.79   86.89
  -5  -5   2   78.79  100.79
  -5   5   1  358.66   39.90
  -5   5   1  356.26   37.50
  -5   5   1  348.87   34.80
  -5   5   1  213.48   51.89
   5   5  -1  294.97   38.40
  -5   5   1  251.37   25.70
  -5  -5   1  279.17   28.70
  -5  -5   1  298.17   19.30
  -5   5   0   35.90   29.50
  -5   5   0   50.79   21.50
   5   5   0   50.69   22.40
  -5   5   0   30.20   19.90
  -5   5   0   53.89   23.60
  -5  -5   0   56.79   71.49
  -5  -5   0   13.90   16.00
   5   5   1  109.89   81.39
   5   5   1  169.88   31.90
  -5   5  -1  219.28   33.10
  -5   5  -1  274.57   37.60
  -5   5  -1  270.17   34.30
  -5   5  -1  212.38   35.60
  -5  -5  -1  228.88   25.90
  -5  -5  -1  197.18   63.59
   5  -5   1  201.28   43.50
   5   5   2  -84.39   81.29
   5   5   2   69.59   27.50
   5   5   2   56.69   22.70
  -5   5  -2  105.79   37.90
   5  -5   2  109.29   39.30
  -5  -5  -2   63.39   18.50
  -5  -5  -2   71.99   69.49
  -5  -5  -2   73.19    7.80
   5   5   3   16.10   21.80
  -5   5  -3   45.20   24.30
   5   5   3   -2.40   23.10
   5   5   3   26.50   99.19
  -5   5  -3   48.80   18.70
  -5  -5  -3   -1.90   17.20
  -5  -5  -3  -93.59   71.79
  -5  -5  -3   37.20    7.80
   5  -5   3   18.10   41.90
   5   5   4  157.48   33.50
  -5   5  -4  156.18   26.40
   5   5   4  129.39   29.10
  -5  -5  -4  168.38   14.80
  -5  -5  -4  205.88   96.49
   5  -5   4  176.28   13.50
   5  -5   4  185.78   51.79
  -5  -5  -4  143.99   12.10
  -5   5  -5   28.60   16.00
   5   5   5   19.60   30.90
   5   5   5   -7.30   20.70
  -5   5  -5   30.60   21.50
   5   5   5    5.20   27.20
   5  -5   5    0.30    5.70
  -5  -5  -5   18.10    5.40
   5  -5   5   31.40   58.09
  -5  -5  -5  -38.80  111.69
  -5   5  -6   96.99   21.30
   5   5   6   90.79   25.00
   5  -5   6  105.09    9.20
  -5  -5  -6   88.99   11.60
   5  -5   6   61.99   15.70
  -5  -5  -6   91.99   10.20
   5   5   7   15.20   16.30
   5   5   7   32.00   19.00
  -5   5  -7   57.89   20.50
  -5   5  -7   10.60   15.20
   5   5   7   23.10   17.50
   5  -5   7   41.00    6.80
   5  -5   7   24.90    8.90
  -5  -5  -7   22.50    6.10
  -5  -5  -7   37.60    6.50
   5   5   8   21.40   15.60
   5   5   8   69.79   20.80
  -5  -5  -8   48.00    7.70
   5  -5   8   58.29    7.20
   5  -5   8   63.79   10.90
  -5   5  -9   75.39   16.70
   5   5   9   37.80   17.40
   5  -5   9   81.59   10.50
   5  -5   9   62.59    8.10
  -5   6   9   18.70   10.50
  -5   6   9   -0.20    8.40
   5   6  -9   21.00   16.90
  -5   6   9   -1.30    9.50
  -5  -6   9   26.50    5.00
   5  -6  -9   18.80    5.50
   5  -6  -9   15.20    7.10
  -5  -6   9   16.50    5.50
  -5   6   8    5.40   11.20
  -5   6   8    8.80   11.10
  -5   6   8    6.50   11.00
   5   6  -8    7.50   18.00
  -5  -6   8   14.90    5.10
  -5  -6   8   12.40    5.40
   5  -6  -8   20.90    6.00
   5  -6  -8   13.50   12.90
  -5   6   7    7.10   12.00
   5   6  -7   -8.00   19.00
  -5   6   7   23.70   16.30
  -5   6   7    9.40   13.30
  -5  -6   7   52.29    9.40
   5  -6  -7   28.10    8.90
   5  -6  -7   28.20    6.80
  -5  -6   7   44.40    7.20
   5   6  -6   14.20   20.00
  -5   6   6   15.80   13.90
  -5   6   6   -6.00   15.50
  -5   6   6   -5.40   13.30
  -5  -6   6   19.10    7.20
  -5  -6   6   13.50    7.70
  -5   6   5   53.09   18.00
   5   6  -5   48.20   23.30
  -5   6   5  108.59   24.30
   5  -6  -5   98.09   12.30
  -5  -6   5   92.39    9.20
  -5  -6   5   93.99   13.10
  -5   6   4   -7.00   14.10
   5   6  -4    3.30   20.40
  -5   6   4   11.20   15.70
  -5   6   4    6.80   15.70
  -5  -6   4    7.60    5.30
   5   6  -3   -3.70   18.50
  -5   6   3   22.90   16.70
  -5   6   3    5.40   16.00
  -5   6   3   31.20   16.90
  -5  -6   3    8.70    5.40
  -5   6   2   71.19   19.10
   5   6  -2   26.70   24.60
  -5   6   2   85.69   19.20
  -5   6   1    4.10   19.10
  -5   6   1   13.40   16.60
  -5   6   0   67.99   27.10
  -5   6   0   54.49   17.10
  -5   6   0   57.29   21.20
   5   6   0   95.39   27.40
  -5  -6   0   98.09    8.60
   5   6   1   27.80   19.70
  -5   6  -1   62.09   17.90
  -5   6  -1   69.39   26.30
  -5   6  -1  119.69   40.10
  -5  -6  -1   68.89    7.90
   5   6   2   41.60   20.80
  -5   6  -2   61.89   23.80
   5   6   2   79.59   26.70
  -5   6  -2   77.99   17.80
  -5  -6  -2   51.39   11.40
  -5  -6  -2   75.69    8.10
   5   6   3    2.10   20.80
   5   6   3   11.70   17.40
  -5   6  -3    4.60   19.40
  -5   6  -3   -0.10   16.90
  -5  -6  -3   -8.80    7.00
  -5  -6  -3   -0.50    4.90
   5   6   4   54.49   20.20
  -5   6  -4   16.00   19.90
   5   6   4    4.10   19.90
  -5   6  -4   57.29   15.20
  -5  -6  -4   33.30    6.20
   5  -6   4   57.29    9.70
  -5  -6  -4   63.79   10.30
   5   6   5   57.69   37.40
   5   6   5   54.39   18.70
  -5   6  -5   65.89   14.30
   5   6   5   48.50   20.00
  -5   6  -5   49.10   16.60
  -5  -6  -5   44.80    8.50
  -5  -6  -5   61.69    9.60
   5  -6   5   52.09    8.40
  -5   6  -6    4.70   11.10
   5   6   6   20.20   19.00
   5   6   6   -3.00   13.40
   5   6   6   12.40   16.50
  -5  -6  -6   19.00    5.70
  -5  -6  -6   17.90    5.40
   5  -6   6   17.30    5.30
   5   6   7    5.20   14.30
   5   6   7   -1.80   11.90
   5   6   7   11.40   15.00
  -5   6  -7    2.20    8.00
   5  -6   7   18.50    7.90
  -5  -6  -7   10.50    4.30
  -5   7   6   19.20   11.30
   5   7  -6   19.80   17.00
  -5   7   6    2.50   10.10
  -5   7   6   31.30   13.00
  -5  -7   6    9.50    6.30
  -5   7   5   -5.00   11.60
  -5   7   5    2.20   13.70
  -5   7   5   -2.90    9.20
   5   7  -5   -9.20   14.80
  -5  -7   5    3.80    7.00
   5   7  -4   36.80   18.00
  -5   7   4   38.80   12.00
  -5  -7   4   44.50    7.70
  -5  -7   4   62.39   12.20
   5   7  -3   19.10   17.30
  -5   7   3   28.70   16.10
  -5   7   3   27.50   11.90
  -5   7   3    0.50   12.40
  -5  -7   3   43.20    7.90
  -5   7   2   15.40   13.40
  -5   7   2   -0.10   12.50
   5   7  -2   16.20   17.90
  -5  -7   2    2.90    5.50
   5   7  -1   13.40   16.10
  -5  -7   1   58.09    7.80
   5   7   0   -1.00   14.70
  -5  -7   0    7.80    5.20
  -5  -7   0   15.20    7.20
  -5  -7  -1   36.00    7.90
  -5  -7  -1   42.30    6.50
   5   7   2   -1.60   15.10
  -5  -7  -2   11.70    6.70
   5   7   3   -6.60   11.60
  -5  -7  -3    8.40    6.10
  -5   7  -4   40.00   12.60
   5   7   4   11.50   12.60
   6   0 -15   28.80   13.70
   6   0 -14   90.99   22.10
  -6   0  14   49.70   17.40
  -6   0  13   15.60   18.70
   6   0 -13   14.30   18.80
   6   0 -12  243.48   32.60
  -6   0  12  274.47   38.30
  -6   0  11    6.80   99.89
   6   0 -11    4.00   17.60
  -6   0  11    0.10   23.00
  -6   0  10  181.38   38.80
  -6   0  10   97.99   80.69
   6   0 -10  127.69   28.30
  -6   0   9  372.86   32.20
  -6   0   9  471.25   51.99
   6   0  -9  404.36   39.80
  -6   0   9  449.76   78.29
  -6   0   8  187.68   16.30
   6   0  -8  225.88   20.20
  -6   0   8  213.38   65.09
   6   0  -8  212.98   29.60
   6   0  -7   76.89   13.70
   6   0  -7   53.79   43.10
   6   0  -7   82.59   23.80
  -6   0   7   73.39   51.89
  -6   0   7   66.09    8.80
   6   0  -6  245.08   21.20
  -6   0   6  293.67   18.80
   6   0  -6  264.67   52.09
  -6   0   6  267.77   53.79
   6   0  -6  192.08   76.59
   6   0  -6  329.57   50.89
   6   0  -6  270.97   19.20
  -6   0   5  463.75   59.19
  -6   0   5  542.95   32.40
   6   0  -5  460.05   80.09
   6   0  -5  552.04   32.20
   6   0  -5  466.55   52.79
   6   0  -4    9.20    5.60
   6   0  -4    4.10   38.90
  -6   0   4   20.10   34.90
  -6   0   3   20.00   30.50
   6   0  -3   89.49   20.90
  -6   0   3   70.89    6.80
   6   0  -3  113.79   37.00
   6   0  -2  -15.40   15.20
  -6   0   2    5.90    3.80
   6   0  -2   12.40   26.90
   6   0  -1   96.59   26.50
  -6   0   1   90.29   29.90
   6   0  -1   56.69   27.50
   6   0  -1   48.20   16.60
  -6   0   1   59.69    6.30
   6   0   0    1.60   26.80
   6   0   0   15.40   17.30
  -6   0   0    8.30    4.40
   6   0   0   30.90   22.20
   6   0   1  161.08   36.60
   6   0   1  146.39   32.10
   6   0   1  178.18   12.10
   6   0   1  180.28   42.70
   6   0   2   17.20   29.90
  -6   0  -2   29.70    6.50
   6   0   2    7.40   23.40
   6   0   2   23.20    4.90
   6   0   3  381.86   27.20
   6   0   3  316.47   52.49
  -6   0  -3  428.66   25.60
   6   0   3  312.47   55.39
   6   0   3  371.26   23.70
   6   0   4   46.20    6.80
   6   0   4  111.09   51.69
   6   0   4   58.39   24.10
  -6   0  -4   56.09    8.30
   6   0   4   61.19   11.60
   6   0   5  226.08   15.50
   6   0   5  215.98   17.70
  -6   0  -5  236.38   17.90
   6   0   5  216.38   35.20
   6   0   6  149.09   14.40
   6   0   6  130.99   32.10
  -6   0  -6  149.79   27.70
   6   0   6  160.68   38.60
   6   0   7   97.59   13.60
   6   0   7   68.59   27.90
   6   0   7   89.69   28.30
   6   0   8    3.00   26.90
   6   0   8    3.40   27.60
   6   0   9   50.19   24.70
   6   0   9   61.69   23.30
   6   0  10    0.80   19.80
   6   0  10   21.30   18.90
   6   0  11   11.40   20.00
   6   0  11    6.10   21.70
   6   0  12  -12.10   12.90
   6   0  12    1.00    9.30
   6   1 -15    1.60   11.40
  -6  -1  15    6.20   11.70
   6  -1 -15    5.00   11.00
  -6   1  14   19.10   17.80
   6   1 -14   13.70   15.20
   6  -1 -14   12.00   15.30
  -6  -1  14    3.40   13.00
   6   1 -13  141.29   25.90
   6  -1 -13   89.49   21.10
  -6  -1  13  109.69   25.70
  -6   1  12   -7.00   23.70
  -6   1  12  -17.70   23.60
  -6  -1  12   -6.20   17.50
  -6   1  11   70.99  132.69
  -6   1  11  161.98   33.30
   6   1 -11   78.39   28.00
  -6   1  11   52.19   30.00
  -6  -1  11  186.98  111.39
   6  -1 -11   98.29   24.00
   6   1 -10  137.89   30.50
  -6   1  10   54.19   89.19
  -6   1  10  130.79   35.30
  -6   1  10  152.48   34.20
  -6  -1  10  116.49   86.49
   6  -1 -10  126.69   15.30
   6  -1 -10  157.58   27.70
  -6  -1  10  145.69   13.90
  -6   1   9  220.88   41.40
   6   1  -9  156.48   29.50
  -6   1   9  208.18   47.70
  -6   1   9  205.28   24.80
  -6  -1   9  210.08   86.09
   6  -1  -9  182.58   16.30
   6  -1  -9  142.79   15.60
  -6  -1   9  181.58   15.00
   6  -1  -9  197.18   28.50
  -6   1   8  152.68   64.29
   6   1  -8  174.38   31.80
  -6   1   8  194.68   16.20
   6  -1  -8  212.98   30.20
   6  -1  -8  214.68   99.99
   6  -1  -8  170.98   15.00
  -6  -1   8  194.28   15.00
  -6  -1   8  109.59   58.39
  -6  -1   8  206.88   15.40
   6  -1  -8  200.98   16.60
   6   1  -7  169.98   49.60
   6   1  -7  169.98   30.40
  -6   1   7  201.78   57.99
  -6   1   7  192.58   14.80
   6  -1  -7  185.78   16.10
   6  -1  -7  174.78   14.00
  -6  -1   7  173.18   53.59
  -6  -1   7   79.79   81.89
  -6  -1   7  176.88   18.80
  -6  -1   7  198.88   13.80
   6  -1  -7  202.08   30.90
  -6  -1   7  174.18   14.70
   6   1  -6  571.84   64.19
  -6   1   6  380.36   63.39
   6   1  -6  441.36   41.90
  -6   1   6  451.95   28.50
   6  -1  -6  424.46   64.09
   6  -1  -6  446.56   27.60
  -6  -1   6  433.86   28.10
   6  -1  -6  465.55   64.89
   6  -1  -6  451.75   29.60
  -6  -1   6  374.36   74.59
  -6  -1   6  455.95   27.30
  -6  -1   6  423.26   27.90
  -6  -1   6  428.86   59.29
   6   1  -5   38.50   24.40
  -6   1   5   46.70    6.10
  -6   1   5   15.80   40.80
   6  -1  -5   41.20   29.10
  -6  -1   5   37.20    7.70
   6  -1  -5  -72.29   37.40
  -6  -1   5   33.40    6.20
  -6  -1   5   41.60    6.40
   6  -1  -5   34.50    6.80
  -6  -1   5    0.00   41.60
  -6  -1   5   29.50   36.80
   6   1  -4  671.83   54.59
  -6   1   4  645.74   60.29
  -6   1   4  664.83   38.20
   6  -1  -4  581.34   58.89
   6  -1  -4  577.74   37.10
  -6  -1   4  604.04   36.80
   6  -1  -4  621.74   58.79
  -6  -1   4  574.64   61.29
   6   1  -3  846.32   59.49
  -6   1   3  852.41   62.29
  -6   1   3  832.82   47.60
  -6  -1   3  802.52   70.19
   6  -1  -3  734.93   46.50
  -6  -1   3  753.32   46.20
  -6  -1   3  754.92   49.50
   6  -1  -3  766.12   63.89
   6  -1  -3  742.83   61.09
   6   1  -2  455.15   42.40
  -6   1   2  501.25   32.30
  -6  -1   2  513.25   53.39
  -6  -1   2  601.64   35.60
  -6  -1   2  586.94   55.09
   6  -1  -2  498.75   46.10
   6  -1  -2  495.35   31.30
   6   1  -1  867.71   60.09
   6   1  -1  843.22   58.89
   6  -1  -1  832.32   50.29
  -6  -1   1  876.11   74.19
   6  -1  -1  851.31   68.89
   6  -1  -1  850.81   60.89
   6   1   0  582.14   46.80
  -6   1   0  569.64   39.70
   6   1   0  596.94   45.40
   6  -1   0  686.73   50.29
  -6  -1   0  653.93   38.70
  -6  -1   0  633.34   37.10
  -6  -1   0  712.93   67.49
   6  -1   0  571.24   55.49
   6  -1   0  659.63   37.50
   6   1   1  238.68   26.40
   6   1   1  237.58   38.90
  -6  -1  -1  260.37   60.39
  -6  -1  -1  259.27   17.10
   6  -1   1  274.17   17.30
   6  -1   1  315.97   35.70
  -6  -1  -1  281.67   18.60
   6  -1   1  249.97   53.59
   6   1   2  355.56   46.10
  -6  -1  -2  358.46   22.10
  -6  -1  -2  313.57   65.69
   6  -1   2  382.76   42.60
   6  -1   2  344.67   21.80
   6  -1   2  320.47   49.60
  -6  -1  -2  349.17   23.60
  -6   1  -3   32.60    7.20
   6   1   3   36.20   19.70
   6   1   3   30.00   36.10
  -6  -1  -3   36.90    7.70
   6  -1   3   31.10   38.10
  -6  -1  -3   38.30    7.10
   6  -1   3   27.70    8.70
   6  -1   3    1.80   29.00
  -6  -1  -3   22.10    7.80
  -6  -1  -3  -48.50   67.19
   6  -1   3   20.10    7.30
   6   1   4  241.78   31.40
   6   1   4  270.77   56.89
  -6   1  -4  267.87   17.40
   6  -1   4  223.58   46.90
   6  -1   4  219.38   15.40
   6  -1   4  214.88   19.20
   6  -1   4  280.77   33.70
  -6  -1  -4  257.87   18.20
  -6  -1  -4  204.18   18.30
  -6  -1  -4  199.48   17.40
   6   1   5  217.58   31.10
  -6  -1  -5  200.88   17.30
   6  -1   5  248.08   39.00
   6  -1   5  199.78   13.90
  -6  -1  -5  186.88   17.00
   6  -1   5  294.87   64.19
   6  -1   5  182.58   17.70
  -6   1  -6  205.18   29.50
   6   1   6  193.98   43.40
   6  -1   6  407.56   85.39
   6  -1   6  140.79   38.10
  -6  -1  -6  150.08   17.30
   6  -1   6  149.29   12.10
   6  -1   6  204.58   15.40
   6   1   7  276.47   39.10
   6   1   7  327.07   47.30
   6   1   7  255.87   36.90
   6  -1   7  263.87   18.00
   6  -1   7  251.97   43.20
   6  -1   7  262.67   19.90
   6   1   8  133.99   48.60
  -6   1  -8  103.69   23.40
   6  -1   8   84.59   11.90
   6   1   9   43.10   23.50
   6   1   9   16.30   23.30
   6   1   9   39.60   23.10
   6  -1   9   62.29   25.90
   6  -1   9   34.40    8.20
   6   1  10   28.60   17.50
   6   1  10   32.10   17.90
   6  -1  10   18.70   21.40
   6  -1  10    0.10   19.40
   6   1  11   36.10   18.50
   6   1  11   13.80   19.00
   6  -1  11    2.90   20.90
   6   1  12    1.50   11.20
   6   1  12    6.70    9.50
  -6   2  14   24.30   13.20
   6   2 -14   -1.30   12.70
   6  -2 -14   14.10   12.10
  -6   2  13   32.80   17.40
   6   2 -13   64.19   20.60
   6  -2 -13   10.40   14.20
  -6   2  12   76.39   21.40
   6  -2 -12   88.99   23.70
   6  -2 -12   88.99   18.60
  -6   2  11   12.20   21.60
   6   2 -11   21.00   20.90
   6  -2 -11   29.60    7.90
  -6  -2  11   17.00    6.20
   6  -2 -11   24.50   19.60
  -6   2  10  332.07   49.30
   6   2 -10  361.06   44.90
  -6   2  10  179.48  116.19
   6  -2 -10  383.76   37.70
   6  -2 -10  328.17   23.90
  -6  -2  10  462.05  117.99
  -6  -2  10  356.36   23.30
   6  -2 -10  341.37   24.40
   6   2  -9   -1.40   22.50
  -6   2   9   40.10   25.00
  -6   2   9   35.70   11.50
  -6   2   9   15.40   26.50
  -6   2   9   62.79   88.89
  -6   2   9   12.90   34.00
   6   2  -9   35.10   21.80
  -6  -2   9   29.40    6.90
   6  -2  -9   78.69  106.69
  -6  -2   9   62.69   76.39
   6  -2  -9   17.70    6.90
   6  -2  -9   13.70    7.50
  -6  -2   9   33.80    7.10
   6  -2  -9    7.60   19.50
  -6   2   8  311.47   22.80
  -6   2   8  256.77   46.70
  -6   2   8  380.76   91.39
   6   2  -8  311.57   39.10
  -6   2   8  288.77   55.69
  -6   2   8  251.77   40.90
  -6   2   8  263.57   63.29
   6  -2  -8  226.58   83.49
  -6  -2   8  169.68   88.59
   6  -2  -8  304.37   42.00
  -6  -2   8  386.56   85.39
   6  -2  -8  313.17   22.50
  -6  -2   8  311.77   20.30
   6  -2  -8  326.67   20.80
  -6  -2   8  326.87   21.50
  -6   2   7  294.87   21.30
  -6   2   7  355.66   80.89
  -6   2   7  268.97   33.90
   6   2  -7  258.37   35.70
   6  -2  -7  303.77   66.09
  -6  -2   7  287.97   20.60
  -6  -2   7  278.57   19.10
   6  -2  -7  289.57   21.70
   6  -2  -7  325.17   35.60
   6  -2  -7  309.47   19.70
  -6  -2   7  401.16   75.39
  -6  -2   7  251.67   62.49
  -6   2   6  123.99   53.29
   6   2  -6   56.79   43.10
   6   2  -6   41.80   23.30
  -6   2   6   73.99   22.60
  -6   2   6   52.69    8.60
   6  -2  -6   52.59   42.40
   6  -2  -6  105.39   25.90
  -6  -2   6   75.09   10.60
  -6  -2   6   57.79    7.30
  -6  -2   6   21.20   47.20
  -6  -2   6   49.70   45.10
   6  -2  -6   60.49   13.00
   6  -2  -6   67.39    8.00
  -6   2   5  588.44   36.80
   6   2  -5  580.34   49.80
   6   2  -5  577.84   66.59
  -6   2   5  645.34   47.30
  -6   2   5  689.43   71.19
  -6  -2   5  589.54   36.20
   6  -2  -5  551.24   71.19
   6  -2  -5  528.75   37.70
   6  -2  -5  588.44   35.20
  -6  -2   5  608.24   35.00
  -6  -2   5  554.24   35.90
   6  -2  -5  530.05   63.19
  -6  -2   5  488.45   66.69
  -6   2   4  583.54   44.80
  -6   2   4  583.94   35.60
   6   2  -4  493.75   48.50
   6   2  -4  592.24   57.69
  -6  -2   4  525.45   66.09
  -6  -2   4  589.64   34.90
   6  -2  -4  531.05   58.29
  -6  -2   4  458.95   56.99
   6  -2  -4  576.04   34.10
   6  -2  -4  614.64   67.79
  -6  -2   4  560.44   35.00
  -6   2   3  155.58   26.20
  -6   2   3  159.68   12.70
   6  -2  -3  157.48   30.60
  -6  -2   3  164.78   37.00
  -6  -2   3  160.08   12.80
   6  -2  -3  187.08   36.20
  -6  -2   3  182.48   44.30
   6  -2  -3  167.98   12.30
  -6  -2   3  179.68   11.40
  -6   2   2  188.78   14.90
   6  -2  -2  235.98   48.70
  -6  -2   2  185.38   45.50
  -6  -2   2  215.98   15.20
   6  -2  -2  217.08   14.50
  -6  -2   2  186.98   41.20
   6  -2  -2  163.48   31.70
  -6  -2   2  225.18   13.70
  -6   2   1   63.29    7.90
  -6  -2   1   23.30   35.10
   6  -2  -1   72.89    8.50
   6  -2  -1  147.79   33.80
   6  -2  -1   98.39   22.50
  -6  -2   1   84.09    8.10
   6   2   0  539.85   56.09
  -6   2   0  606.44   36.30
   6  -2   0  582.04   47.90
  -6  -2   0  590.24   36.80
  -6  -2   0  622.44   61.99
   6  -2   0  545.35   35.10
  -6  -2   0  607.54   34.70
   6  -2   0  529.05   63.69
   6   2   1  327.87   50.89
  -6   2  -1  409.76   25.30
   6  -2   1  371.86   24.10
  -6  -2  -1  351.26   25.40
   6  -2   1  285.77   59.99
  -6  -2  -1  505.35   58.09
  -6  -2  -1  402.46   26.20
  -6  -2  -1  406.16   23.60
  -6   2  -2  162.48   23.40
  -6   2  -2  194.68   13.70
   6   2   2  173.48   45.80
   6   2   2  167.78   30.80
  -6  -2  -2  171.28   13.50
  -6  -2  -2  164.98   14.50
  -6  -2  -2  157.88   11.70
  -6  -2  -2  122.09   49.80
   6  -2   2  168.98   46.80
   6  -2   2  149.49   31.30
   6   2   3 1066.59   72.69
   6   2   3  889.01   90.29
   6   2   3  918.31   87.69
   6  -2   3  893.21  101.49
   6  -2   3 1044.00   78.79
  -6  -2  -3 1090.69   60.29
  -6  -2  -3 1051.99   62.39
  -6  -2  -3 1028.40   59.39
   6  -2   3  929.41   62.09
   6  -2   3 1021.50   59.39
   6   2   4  -29.10   47.80
   6   2   4   31.00   21.30
   6  -2   4   11.40   27.00
   6  -2   4   29.80   34.20
  -6  -2  -4   16.20    6.50
  -6  -2  -4   10.90    8.90
  -6  -2  -4   14.40    5.50
  -6  -2  -4   13.40   72.39
   6  -2   4   11.00    4.30
   6  -2   4    4.10   10.20
  -6   2  -5  305.97   57.39
   6   2   5  320.27   79.59
  -6   2  -5  365.96   38.30
  -6   2  -5  268.67   32.40
   6   2   5  281.17   45.00
  -6  -2  -5  271.87   22.90
   6  -2   5  251.27   22.10
  -6  -2  -5  280.67   19.50
   6  -2   5  264.17   59.49
   6  -2   5  276.17   18.20
  -6   2  -6  342.87   32.90
  -6   2  -6  282.97   53.79
   6   2   6  345.77   45.50
   6   2   6  370.66   39.40
   6   2   6  294.67   96.59
   6  -2   6  372.46   22.80
   6  -2   6  329.07   66.79
  -6  -2  -6  351.06   24.60
  -6  -2  -6  363.56   24.40
   6  -2   6  394.26   26.00
  -6  -2  -6  345.67   29.40
  -6   2  -7   11.10   13.80
   6   2   7    1.50   20.20
  -6   2  -7   38.60   31.00
   6   2   7   53.49   32.00
   6   2   7   21.90   24.80
   6  -2   7   17.50    7.70
  -6  -2  -7   19.20    7.70
   6  -2   7   11.70    5.00
  -6  -2  -7   24.10   16.20
   6   2   8   16.60   21.50
   6   2   8   12.50   22.90
  -6   2  -8   20.80   13.60
   6   2   8  -19.20   24.30
  -6   2  -8   11.80   28.10
   6  -2   8   19.70    6.90
   6  -2   8   27.50  144.29
   6  -2   8  -32.80   23.40
   6  -2   8   11.20    5.40
   6   2   9   18.70   20.50
  -6   2  -9    0.80   28.20
   6   2   9   15.50   26.00
   6   2   9   10.50   21.60
   6  -2   9   35.40   25.50
   6   2  10   20.30   20.10
   6   2  10   28.10   16.20
   6   2  10   29.30   20.20
   6  -2  10   27.40    6.60
   6   2  11   22.40   13.80
   6   2  11   14.10   11.50
   6  -2  11   29.30   13.80
   6   2  12    5.80    9.90
   6   2  12  -11.30    8.50
   6  -2  12    2.60    8.70
  -6   3  14    6.00    7.90
   6   3 -14   10.20   15.00
   6  -3 -14   28.20   12.80
  -6  -3  14   25.50    9.80
  -6   3  13  105.19   20.50
   6   3 -13   79.59   22.10
  -6   3  12    4.90   29.60
  -6   3  12  -24.80   18.50
   6   3 -12   -3.60   16.00
   6  -3 -12   -4.00    6.70
  -6  -3  12   -3.60    5.10
   6  -3 -12    4.20   16.40
  -6   3  11   51.59   33.10
  -6   3  11   34.80   21.00
  -6   3  11   39.10   19.50
   6   3 -11   43.40   22.50
   6  -3 -11   32.70    9.10
  -6  -3  11   23.50    7.80
   6  -3 -11   18.90   16.00
   6  -3 -11   64.19   10.50
  -6  -3  11   50.49    8.40
  -6   3  10  104.79   24.60
  -6   3  10  147.69   34.60
   6   3 -10   56.19   24.80
   6  -3 -10  115.89   13.20
   6  -3 -10  100.59   25.30
  -6  -3  10  104.79   11.20
  -6  -3  10  123.69   11.60
   6  -3 -10  115.59   12.40
   6   3  -9  195.48   32.90
  -6   3   9  119.19   26.20
  -6   3   9  126.39   20.70
  -6   3   9  158.38   41.00
   6   3  -9  121.89   34.00
  -6   3   9  151.68   29.60
   6  -3  -9    5.50  110.19
  -6  -3   9   38.00   97.39
   6  -3  -9  140.89   27.70
   6  -3  -9  140.39   13.10
   6  -3  -9  155.68   15.00
  -6  -3   9  153.88   12.60
  -6  -3   9  144.99   13.70
  -6  -3   9  -64.09   95.19
  -6   3   8  219.18   32.40
   6   3  -8  196.08   36.50
  -6   3   8  199.48   20.20
  -6   3   8  210.48   39.90
   6   3  -8  258.47   40.20
  -6   3   8  205.58   39.80
   6  -3  -8  101.49   76.69
   6  -3  -8  207.88   18.10
  -6  -3   8  230.58   17.20
  -6  -3   8  308.67   80.99
  -6  -3   8  216.18   89.29
   6  -3  -8  234.08   32.40
  -6  -3   8  214.18   15.60
   6  -3  -8  225.08   16.30
  -6   3   7   32.40   20.60
  -6   3   7    2.10   23.70
   6   3  -7    0.80   27.50
  -6   3   7   10.80    9.70
  -6   3   7   15.70   27.50
   6   3  -7   31.20   24.60
  -6   3   7    0.00   41.80
   6  -3  -7   62.69   55.09
   6  -3  -7   27.40    8.40
  -6  -3   7   21.50    5.50
   6  -3  -7   23.40    6.00
  -6  -3   7   15.30   56.19
  -6  -3   7   68.89   69.49
  -6  -3   7   29.30    7.90
   6  -3  -7   58.39   26.00
  -6   3   6  263.07   44.20
  -6   3   6  309.27   47.50
   6   3  -6  198.18   38.60
   6   3  -6  351.46   50.49
  -6   3   6  250.87   21.30
  -6   3   6  280.97   43.00
   6  -3  -6  292.17   18.90
  -6  -3   6  202.48   68.69
   6  -3  -6  257.77   56.89
  -6  -3   6  306.47   18.80
   6  -3  -6  305.57   23.20
  -6  -3   6  318.77   61.39
   6  -3  -6  298.17   41.90
  -6   3   5   19.80    8.10
  -6   3   5   10.40   18.20
   6   3  -5    5.10   21.60
  -6  -3   5   19.50   38.10
   6  -3  -5   -4.00   38.20
   6  -3  -5   10.90    5.30
  -6  -3   5    2.10    4.50
  -6  -3   5    4.70    7.60
  -6  -3   5   36.90   59.59
   6   3  -4  153.78   31.50
  -6   3   4  177.18   15.60
  -6   3   4  197.08   26.50
   6  -3  -4  192.28   14.10
  -6  -3   4  206.68   16.80
  -6  -3   4  133.29   53.09
  -6  -3   4  194.98   15.70
   6  -3  -4  281.07   47.20
  -6  -3   4  214.38   46.40
  -6  -3   4  196.28   13.30
  -6   3   3  143.39   12.60
  -6   3   3  114.99   24.80
   6   3  -3  123.59   31.30
  -6  -3   3   85.39   37.10
  -6  -3   3  135.39   12.20
  -6  -3   3  236.38   58.99
  -6  -3   3  136.39   14.10
  -6  -3   3  137.79   10.10
   6  -3  -3  122.99   15.10
   6  -3  -3  102.59   29.00
   6   3  -2   95.79   26.30
  -6   3   2   64.99    9.20
  -6   3   2   72.39   19.60
  -6  -3   2   66.49    6.50
  -6  -3   2   50.69    8.80
   6  -3  -2   52.09    7.60
   6  -3  -2  122.99   28.00
  -6  -3   2  122.29   39.60
  -6  -3   2   58.69    9.60
  -6   3   1  324.57   30.20
   6   3  -1  276.97   37.10
  -6   3   1  310.77   22.50
   6   3  -1  233.68   48.90
   6  -3  -1  345.27   21.50
  -6  -3   1  339.37   20.30
   6  -3  -1  317.27   37.60
  -6  -3   1  324.87   54.69
  -6  -3   1  347.37   23.00
  -6  -3   1  326.77   22.80
   6   3   0   63.89   42.80
   6   3   0   55.99   30.40
   6   3   0   96.59   27.10
  -6   3   0  103.89   22.30
  -6   3   0   73.09    9.80
  -6  -3   0   82.39   45.00
   6  -3   0   45.60   24.20
  -6  -3   0   70.09   12.20
   6  -3   0   85.79   10.20
  -6  -3   0   75.79   10.30
   6   3   1  235.28   34.50
   6   3   1  216.98   54.69
  -6   3  -1  215.48   17.00
   6   3   1  176.88   37.20
  -6   3  -1  244.78   26.30
  -6  -3  -1  213.88   18.20
  -6  -3  -1  212.18   17.20
  -6  -3  -1  236.58   14.60
   6  -3   1  168.38   36.00
  -6  -3  -1  215.58   49.80
  -6   3  -2  535.85   39.40
   6   3   2  513.15   70.79
   6   3   2  410.86   43.90
  -6   3  -2  479.55   30.70
   6   3   2  434.56   47.30
  -6  -3  -2  476.85   28.60
  -6  -3  -2  465.85   32.70
  -6  -3  -2  373.56   74.99
   6  -3   2  446.66   49.70
   6  -3   2  482.35   29.20
   6   3   3    4.10   21.40
   6   3   3    4.10   23.90
   6   3   3   40.90   56.39
  -6   3  -3    4.60   18.80
  -6   3  -3   -9.30   27.50
  -6  -3  -3   21.00   62.29
   6  -3   3   19.00    5.50
  -6  -3  -3   12.70    4.50
  -6  -3  -3   20.00    6.00
   6  -3   3  -46.60   30.30
  -6  -3  -3   23.10   10.30
   6   3   4  354.56   75.39
   6   3   4  273.67   46.70
   6   3   4  226.28   33.80
  -6   3  -4  261.37   29.50
  -6   3  -4  247.58   42.30
  -6   3  -4  290.57   38.40
  -6  -3  -4  222.98   83.39
  -6  -3  -4  240.18   30.20
  -6  -3  -4  234.68   16.60
  -6  -3  -4  251.87   18.30
   6  -3   4  200.98   23.10
   6  -3   4  249.78   16.60
   6  -3   4  321.37   55.69
  -6   3  -5   49.60   22.60
   6   3   5   40.10   26.10
  -6   3  -5   91.19   18.00
  -6   3  -5   69.99   30.50
   6   3   5   69.09   32.90
   6   3   5   16.10   21.50
   6   3   5  122.59   78.09
   6  -3   5   65.59   12.00
  -6  -3  -5   48.50    7.50
   6  -3   5   57.09   46.20
   6  -3   5   54.99    7.40
  -6  -3  -5   -4.10  101.89
  -6  -3  -5   67.79   15.80
  -6  -3  -5   56.29    8.70
  -6   3  -6   48.60   16.80
   6   3   6  -51.69   98.09
   6   3   6   23.60   26.20
   6   3   6   44.60   27.40
   6   3   6   86.39   24.60
  -6   3  -6   69.79   26.20
  -6  -3  -6   60.99   17.00
   6  -3   6   76.29   59.59
   6  -3   6   55.89   11.20
  -6  -3  -6   60.49   10.30
  -6   3  -7   96.59   27.70
  -6   3  -7  112.59   22.50
   6   3   7  112.49   31.80
   6   3   7  152.08   30.20
   6  -3   7  130.99   13.90
   6  -3   7   89.89   74.29
   6  -3   7  111.59    9.70
  -6  -3  -7  122.69   12.80
  -6  -3  -7  113.69   11.90
  -6   3  -8  -11.10   11.00
   6   3   8   13.50   20.60
  -6   3  -8   -7.00   21.40
   6  -3   8    5.00    4.40
  -6   3  -9   71.29   20.50
   6   3   9   83.89   20.40
   6   3   9   58.79   21.80
   6  -3   9   78.19    8.80
   6  -3   9   75.29   10.40
   6   3  10   10.40   15.50
   6   3  10   -3.30   17.40
   6   3  10   24.50   14.00
  -6   3 -10   25.90   15.30
   6  -3  10   22.30    7.50
   6  -3  10   28.50    6.00
   6   3  11   -8.10   18.20
   6   3  11   13.10   10.70
   6   3  11   11.80   17.10
   6  -3  11    0.10   10.60
  -6   4  13   12.50    7.70
   6   4 -13  -16.90   13.20
   6  -4 -13   -3.80   12.50
  -6  -4  13    8.80    8.20
  -6   4  12    6.70   10.20
  -6   4  12   13.20   11.70
   6   4 -12   60.39   21.70
   6  -4 -12   21.30   14.50
  -6   4  11   31.10   16.70
  -6   4  11   22.70   17.20
   6   4 -11    6.30   16.10
   6  -4 -11   15.00   15.90
  -6  -4  11   16.00    5.10
   6  -4 -11   14.50    8.10
   6  -4 -11    9.30    5.90
  -6  -4  11    9.40    6.40
  -6   4  10   42.40   18.50
  -6   4  10   39.80   17.70
  -6   4  10    7.70   15.60
   6   4 -10    8.70   20.10
   6  -4 -10   -0.80   16.90
  -6  -4  10   45.30    8.10
   6  -4 -10   24.40    6.80
   6  -4 -10   30.50    7.00
  -6   4   9   42.30   20.20
  -6   4   9   58.39   19.10
   6  -4  -9  148.49  160.08
  -6  -4   9 -268.07  187.08
   6  -4  -9   33.40   31.80
   6   4  -8   67.39   23.70
  -6   4   8   51.89   20.00
  -6   4   8   76.59   23.10
  -6   4   8   60.39   22.10
   6   4  -8   33.60   24.70
  -6  -4   8   54.29    8.50
   6  -4  -8   67.29    9.20
   6  -4  -8    2.60   94.89
  -6  -4   8  -44.40   79.09
  -6  -4   8   56.59   10.40
   6  -4  -8   65.79   12.50
   6  -4  -8   88.29   25.00
  -6   4   7   42.40   15.00
  -6   4   7   39.40   21.00
   6   4  -7   28.60   27.00
  -6   4   7   24.10   21.20
   6   4  -7   32.80   38.20
  -6   4   7   39.40   19.90
  -6  -4   7   18.50   90.99
   6  -4  -7   23.10   25.50
   6  -4  -7   39.30   71.49
  -6  -4   7   28.10    6.10
  -6  -4   7   42.30    8.60
  -6  -4   7   74.59   69.29
   6  -4  -7   43.50    7.10
   6  -4  -7   28.20    9.50
  -6   4   6   73.69   22.50
  -6   4   6   58.19   13.90
  -6   4   6  107.09   26.10
   6   4  -6   92.59   33.00
  -6   4   6   57.99   21.80
   6   4  -6   47.40   28.60
   6  -4  -6   85.49   14.00
  -6  -4   6   84.39   12.70
  -6  -4   6   54.49   89.19
   6  -4  -6   74.59    9.60
  -6  -4   6   79.59    8.70
  -6   4   5  303.47   64.09
   6   4  -5  345.07   41.30
  -6   4   5  350.36   27.40
  -6   4   5  391.46   41.40
  -6   4   5  407.86   36.70
  -6   4   5  370.46   39.50
  -6  -4   5  326.97   25.30
  -6  -4   5  368.86   22.90
   6  -4  -5  368.76   23.50
   6  -4  -5  340.37   68.99
  -6  -4   5  243.98   89.89
  -6  -4   5  372.16   70.79
  -6   4   4  259.37   38.00
  -6   4   4  278.87   37.70
  -6   4   4  231.48   21.20
  -6   4   4  282.27   32.20
   6   4  -4  260.77   38.10
  -6  -4   4  301.77   60.39
  -6  -4   4  196.28   72.79
   6  -4  -4  256.77   57.29
   6  -4  -4  240.68   17.60
  -6  -4   4  244.58   16.70
  -6  -4   4  246.78   19.90
  -6   4   3   21.90   36.20
   6   4  -3   -0.60   22.60
  -6   4   3  -21.90   19.90
  -6   4   3   21.10   17.20
  -6   4   3    1.30   11.00
  -6   4   3  -21.90   19.70
   6  -4  -3  -25.50   33.70
  -6  -4   3    0.90   10.80
  -6  -4   3    4.20    4.30
  -6  -4   3   -1.40   11.20
   6  -4  -3   16.90    7.20
  -6  -4   3   47.60   46.70
  -6  -4   3  -80.69   67.89
  -6   4   2  100.79   34.10
  -6   4   2  187.08   29.70
   6   4  -2   99.19   27.80
  -6   4   2  179.48   34.90
  -6   4   2  115.39   14.30
   6  -4  -2  134.99   33.50
  -6  -4   2  134.79   10.00
  -6  -4   2  149.09   46.90
  -6  -4   2  137.89   16.10
  -6  -4   2  108.09   14.70
   6   4  -1   -1.50   21.90
  -6   4   1   -7.20   15.30
  -6   4   1   -2.70   21.90
  -6   4   1   48.40   32.20
  -6   4   1   10.80   20.60
  -6   4   1    5.00    9.20
  -6  -4   1   11.60    8.40
  -6  -4   1   12.20    9.90
  -6  -4   1    7.60    4.40
   6  -4  -1   -6.60   28.30
  -6  -4   1   16.90   48.60
   6   4   0   26.80   28.90
  -6   4   0   46.70   21.20
  -6   4   0   36.30   30.80
  -6   4   0   45.90   21.00
  -6   4   0   35.70   29.00
   6   4   0   26.80   21.90
  -6   4   0   25.40   10.00
  -6  -4   0   50.79   12.40
  -6  -4   0   49.80    9.80
   6  -4   0    4.70   27.00
  -6  -4   0  -44.90   51.29
  -6   4  -1  145.59   27.50
   6   4   1  114.89   27.20
  -6   4  -1  120.19   29.60
  -6   4  -1   96.79   30.10
   6   4   1  151.58   64.39
   6   4   1  140.09   32.20
  -6   4  -1  136.99   28.20
  -6  -4  -1  130.79   58.89
   6  -4   1  123.19   33.70
  -6  -4  -1  131.99   16.30
  -6  -4  -1  114.89   13.60
  -6  -4  -1  121.49    9.70
   6  -4   1  136.29   15.50
   6   4   2   18.30   24.70
   6   4   2  -14.20   21.20
  -6   4  -2  -31.50   24.70
  -6   4  -2    5.00   20.00
   6   4   2  -28.20   64.89
  -6   4  -2   26.40   23.30
  -6   4  -2   13.60   17.80
  -6  -4  -2   21.60   13.00
   6  -4   2   10.30    7.60
   6  -4   2   46.10   33.80
  -6  -4  -2   24.00   63.09
  -6  -4  -2   17.70    4.30
  -6   4  -3   73.39   18.80
   6   4   3   49.20   25.00
  -6   4  -3   64.19   27.80
   6   4   3   23.10   24.80
   6   4   3   72.79   39.10
  -6   4  -3   84.99   25.40
   6   4   3   97.69   80.49
   6  -4   3   86.69   39.00
   6  -4   3   51.79    9.20
  -6  -4  -3   64.79   15.90
  -6  -4  -3   39.60    6.90
  -6  -4  -3   82.09   71.79
  -6  -4  -3   68.69    9.80
   6   4   4 -152.18   90.89
  -6   4  -4  -18.20   34.50
  -6   4  -4    4.20   22.60
   6   4   4   -4.30   20.60
  -6   4  -4  -15.20   23.20
   6   4   4  -10.40   20.80
   6   4   4   19.40   32.10
  -6  -4  -4  -13.10   88.79
   6  -4   4  -32.50   43.00
  -6  -4  -4    5.60    6.50
  -6  -4  -4    3.80   14.30
  -6   4  -5  147.09   29.50
   6   4   5  127.09   31.10
   6   4   5  107.09   30.70
   6   4   5  197.88  116.39
  -6   4  -5  144.29   23.70
  -6   4  -5  167.08   30.30
   6  -4   5  140.69   11.20
  -6  -4  -5  239.78  117.79
  -6  -4  -5  138.49   12.00
  -6  -4  -5  140.19   13.40
   6  -4   5  181.78   56.79
  -6  -4  -5   92.79   22.30
   6  -4   5  159.88   19.70
   6   4   6   -8.60   20.40
  -6   4  -6   19.50   22.50
   6   4   6   36.80   25.10
   6   4   6   -2.70   19.40
  -6   4  -6   22.00   14.40
   6  -4   6  -61.59   64.09
  -6  -4  -6   34.70    6.80
   6  -4   6   24.40    5.10
   6  -4   6   13.20   10.90
  -6  -4  -6   10.90  156.88
  -6  -4  -6   31.90    7.30
  -6   4  -7   77.49   22.80
   6   4   7   17.00   19.40
  -6   4  -7   48.00   13.10
   6  -4   7   66.69   12.20
  -6  -4  -7   59.49    9.80
  -6  -4  -7   62.09    9.40
   6  -4   7   56.69    7.00
   6   4   8   -0.70   16.80
  -6   4  -8   10.90   15.30
  -6   4  -8   12.30   11.00
   6   4   8   19.50   22.90
   6   4   8    4.00   15.90
  -6  -4  -8   19.20    5.80
   6  -4   8   12.20    4.40
   6   4   9   41.50   15.30
   6   4   9    8.00   13.80
  -6   4  -9    1.30   11.10
   6  -4   9   15.20    5.50
   6  -4   9   16.90    6.10
   6   4  10   27.70   14.90
  -6   4 -10   27.00   11.10
   6  -4  10   26.40    5.30
   6  -4  10   23.20   12.50
  -6   5  11    4.30    8.40
  -6   5  11    5.10   12.50
   6  -5 -11   38.40    7.90
  -6   5  10   -3.00   12.90
   6   5 -10    6.60   17.70
  -6   5  10   -0.20   12.40
  -6   5  10   -5.70   11.20
  -6  -5  10    4.90    5.10
   6  -5 -10    3.10    6.10
   6  -5 -10   31.10   21.30
  -6  -5  10    3.30    4.60
   6  -5 -10    2.20    5.50
  -6   5   9   71.19   19.50
   6  -5  -9  130.79   11.80
  -6  -5   9   98.89   10.20
  -6   5   8  184.48   29.80
   6   5  -8  176.58   34.20
  -6   5   8  170.78   25.50
  -6   5   8  168.48   27.60
  -6  -5   8  208.88   15.60
   6  -5  -8  227.38   17.50
  -6  -5   8  215.18   14.70
   6  -5  -8  202.58   15.30
  -6   5   7   34.30   17.10
  -6   5   7   46.00   20.20
   6   5  -7    8.60   22.80
  -6   5   7   51.19   17.80
   6  -5  -7   47.20   10.30
  -6  -5   7   58.39   10.50
  -6  -5   7   58.09    8.00
   6  -5  -7   71.19    9.60
  -6   5   6   20.30   16.90
  -6   5   6   12.50   18.60
   6   5  -6   14.30   25.40
  -6   5   6   14.10   17.20
  -6  -5   6   40.90   10.50
   6  -5  -6   66.49   80.99
  -6  -5   6  -42.60   73.29
  -6   5   5    3.40   16.90
   6   5  -5   35.80   25.70
  -6   5   5   30.20   17.30
  -6   5   5    0.90   16.80
   6  -5  -5  -38.70   65.89
   6  -5  -5   16.20    7.30
  -6  -5   5   12.70    5.50
  -6  -5   5  117.29   66.79
  -6  -5   5    8.30    7.50
  -6   5   4   53.39   20.30
  -6   5   4   42.80   19.50
  -6   5   4   55.59   19.70
   6   5  -4   33.90   24.40
  -6   5   4   22.10   17.60
   6  -5  -4   36.90    8.40
  -6  -5   4    3.90   59.79
  -6  -5   4 -144.59  184.68
  -6  -5   4   40.80    9.10
  -6  -5   4   55.59    7.60
   6  -5  -4  -80.59   56.09
   6   5  -3   54.09   25.30
  -6   5   3   51.49   18.30
  -6   5   3   57.09   20.40
  -6   5   3   58.19   18.60
  -6   5   3   57.09   18.90
  -6   5   3   23.00   35.30
   6  -5  -3  -26.20   51.89
  -6  -5   3  121.19   62.29
  -6  -5   3   48.80    9.50
  -6  -5   3   53.89    7.50
   6  -5  -3   70.29   11.40
  -6  -5   3  126.89  104.79
  -6   5   2    7.00   17.40
  -6   5   2   15.50   39.60
  -6   5   2   -2.50   17.90
   6   5  -2   -8.60   21.10
  -6   5   2    8.40   16.70
  -6   5   2   26.30   18.30
  -6  -5   2   53.49   60.39
  -6  -5   2   -2.20    4.60
   6  -5  -2  -16.90   43.80
  -6  -5   2 -179.88   98.89
  -6  -5   2   -1.80    8.30
   6   5  -1  277.27   36.80
  -6   5   1  309.77   32.10
  -6   5   1  290.97   59.09
  -6   5   1  242.48   35.40
  -6   5   1  253.97   36.40
  -6   5   1  296.67   36.60
  -6  -5   1  289.47   69.39
  -6  -5   1  236.28   20.50
  -6  -5   1  240.68   28.70
   6  -5  -1  208.28   47.10
   6   5   0   -3.00   19.30
  -6   5   0   26.40   19.10
  -6   5   0   10.50   25.60
  -6   5   0   13.90   18.90
  -6   5   0   19.80   19.80
  -6  -5   0  -29.80   64.29
  -6  -5   0   27.80    8.60
  -6  -5   0   21.30    4.80
  -6  -5   0   24.50   17.00
   6  -5   0  -23.00   39.90
   6   5   1   14.60   26.30
  -6   5  -1   47.80   23.20
  -6   5  -1   15.00   22.20
   6   5   1   61.69   23.80
  -6   5  -1   67.49   18.70
  -6   5  -1   45.30   21.80
  -6  -5  -1   63.49   20.50
  -6  -5  -1   56.39    9.90
   6  -5   1   56.19   39.90
  -6  -5  -1   57.79    7.30
  -6  -5  -1   -7.20   73.49
   6   5   2  207.58   34.10
  -6   5  -2  279.67   31.60
  -6   5  -2  300.57   37.60
  -6   5  -2  224.78   36.90
   6   5   2  143.39   35.90
  -6  -5  -2  235.68   17.70
   6  -5   2  194.68   47.20
   6  -5   2  209.48   18.50
  -6  -5  -2  219.88   15.30
  -6  -5  -2  229.08   86.09
  -6   5  -3    5.80   15.60
  -6   5  -3    1.30   19.80
   6   5   3    2.50   21.00
   6   5   3   20.10   23.90
  -6   5  -3   18.70   23.30
  -6  -5  -3   11.30    5.10
   6  -5   3   48.70   49.30
   6  -5   3    6.50    7.10
  -6  -5  -3   -7.20   96.09
  -6  -5  -3   10.40    5.70
   6   5   4   -5.00   22.50
  -6   5  -4   23.90   14.80
  -6   5  -4   38.20   20.10
   6  -5   4  135.09   69.99
  -6  -5  -4   18.20    5.40
   6  -5   4   28.30    6.60
  -6  -5  -4 -107.79  114.29
   6   5   5   13.40   19.80
   6   5   5  -19.50   19.10
  -6   5  -5  -10.10   17.50
   6   5   5  -20.40   18.20
  -6   5  -5    3.90   12.30
  -6  -5  -5   10.20    5.90
   6  -5   5    6.20    5.20
  -6  -5  -5    3.00    6.10
  -6   5  -6    9.30   16.10
   6   5   6    2.10   16.70
  -6   5  -6   19.40   14.80
   6   5   6   17.90   18.80
  -6  -5  -6   45.50    8.80
   6  -5   6   38.00   10.50
  -6  -5  -6   29.50    6.30
  -6   5  -7    2.30    9.50
   6   5   7    9.10   14.90
   6   5   7    4.10   16.80
  -6   5  -7    2.30   12.50
   6   5   7    9.70   15.30
   6  -5   7   25.40    7.60
  -6  -5  -7   19.80    5.30
   6  -5   7   10.10    4.60
  -6  -5  -7   13.70    6.10
  -6   5  -8   -1.60   10.50
   6   5   8   -0.20   12.00
   6   5   8   -2.50   17.10
   6   5   8   -8.40   11.70
   6  -5   8    2.00    5.00
   6  -5   8   -2.40    6.90
  -6  -5  -8   -1.50    7.40
  -6   5  -9   61.89   14.40
   6  -5   9   50.39    8.10
   6  -5   9   58.19   13.90
  -6   6   9   -3.50    9.00
  -6   6   9    8.30    8.70
   6   6  -9   18.90   15.10
  -6   6   9    5.40    7.50
   6  -6  -9   13.80    5.50
  -6  -6   9   22.70    4.50
  -6  -6   9   16.00    9.50
  -6   6   8    9.80   10.70
  -6   6   8   19.10   12.60
  -6   6   8   12.60    9.80
   6   6  -8   18.80   17.80
   6  -6  -8   12.00    6.40
  -6  -6   8   21.10   10.80
   6  -6  -8    8.40    6.10
  -6  -6   8   10.20    4.90
   6   6  -7   13.10   18.20
  -6   6   7   30.20   12.50
   6  -6  -7   26.10   11.30
   6  -6  -7   58.39    9.30
  -6  -6   7   39.80    7.20
  -6  -6   7   54.89    8.50
   6   6  -6  -11.00   18.90
  -6   6   6   -7.40   13.70
  -6   6   6    4.40   13.20
  -6   6   6   12.70   16.50
  -6  -6   6    1.40    5.70
   6  -6  -6    4.60    6.80
  -6  -6   6   18.00    5.40
  -6   6   5   84.19   20.90
  -6   6   5   36.00   14.90
  -6   6   5   79.09   21.50
   6  -6  -5   58.59   11.50
  -6  -6   5   74.59   10.90
  -6  -6   5   72.49    8.30
  -6   6   4   45.00   15.10
  -6   6   4   40.70   14.90
   6   6  -4   36.50   21.50
  -6  -6   4   62.19    8.00
  -6  -6   4   54.99   11.50
  -6   6   3   12.00   13.70
  -6   6   3   20.30   13.60
   6   6  -3   36.10   20.90
  -6   6   3   48.10   16.60
  -6  -6   3   39.10    8.50
  -6   6   2  124.19   22.70
   6   6  -2  124.89   28.80
  -6   6   2  110.09   24.40
  -6  -6   2  120.79   14.20
  -6  -6   2  129.69   10.40
   6   6  -1   35.90   21.50
  -6   6   1   25.10   18.40
  -6   6   1  -26.00   25.60
  -6   6   1   10.90   14.70
  -6   6   1   18.40   17.10
  -6  -6   1   10.40    4.90
  -6  -6   1   10.80    8.10
  -6   6   0  115.59   27.30
  -6   6   0  112.09   25.10
  -6   6   0  167.28   36.80
   6   6   0  106.79   27.20
  -6   6   0  114.49   24.20
  -6  -6   0   92.99    9.40
  -6   6  -1  175.08   25.10
  -6   6  -1  221.68   44.00
  -6   6  -1  141.49   32.90
  -6  -6  -1  155.68   14.60
  -6  -6  -1  170.58   12.30
   6   6   2   20.90   18.60
   6   6   2   -8.00   22.70
  -6   6  -2    5.70   18.60
  -6   6  -2   -6.60   21.40
  -6  -6  -2    9.40    5.80
  -6  -6  -2    7.80    5.00
   6   6   3  130.99   27.30
   6   6   3  129.29   30.80
  -6   6  -3  158.08   21.40
   6  -6   3  148.89   13.20
  -6  -6  -3  104.69   12.30
   6   6   4   18.30   17.50
  -6   6  -4   -1.10   12.80
  -6   6  -4    5.70   11.30
   6   6   4   -6.10   17.90
  -6  -6  -4    2.40    5.20
   6  -6   4   20.50    6.30
  -6  -6  -4    3.90    5.50
  -6   6  -5   94.49   19.60
  -6   6  -5  113.19   16.70
  -6  -6  -5   89.99    9.70
  -6  -6  -5   79.99   10.00
   6  -6   5   94.59    9.20
   6   6   6   30.60   14.70
  -6   6  -6   13.60   10.30
   6   6   6   31.10   16.20
  -6  -6  -6   28.10    6.70
   6  -6   6   14.20    7.90
  -6   7   5    3.50    8.60
  -6   7   5   10.60   14.00
  -6   7   5   -3.20    6.80
   6   7  -5   -1.80   14.10
  -6  -7   5   -5.40    5.50
  -6   7   4   14.20   13.30
  -6   7   4    9.90   10.10
   6   7  -4    4.50   14.00
  -6   7   3   12.70   15.80
   6   7  -3   12.80   14.60
  -6   7   3    4.60   10.30
  -6   7   2    5.30   13.80
  -6   7   2    1.20   10.40
   6   7  -2   -9.90   13.40
  -6  -7   2    8.70    4.80
  -6   7   1   38.20   11.90
   6   7  -1   15.70   16.70
  -6  -7   1   21.50    6.10
  -6  -7   1   17.70    5.10
  -6  -7   0    4.80    5.40
  -6  -7   0   -3.40    5.10
   6   7   1   -3.10   12.70
  -6  -7  -1    4.40    5.90
   6   7   2   -7.70   13.60
  -6  -7  -2    6.70    5.40
  -6   7  -3    9.40   11.40
   6   7   3    6.50   12.30
  -6  -7  -3   13.50    5.40
   7   0 -15    2.50   12.70
   7   0 -14  -11.30   14.40
  -7   0  14   -6.00   13.30
  -7   0  13   21.10   26.70
   7   0 -13   20.40   16.60
  -7   0  12  130.29   31.30
   7   0 -12   78.49   32.20
  -7   0  11  148.79   35.60
   7   0 -11  134.79   26.90
  -7   0  10  140.29   95.09
   7   0 -10  119.99   26.60
  -7   0  10  151.28   38.40
   7   0  -9  247.68   33.90
  -7   0   9  239.08   86.49
  -7   0   9  300.47   40.70
  -7   0   8   48.10   10.90
   7   0  -8   36.00   12.40
  -7   0   8   33.30   17.90
  -7   0   8   71.09   29.10
   7   0  -8   46.70   22.80
  -7   0   8   65.09   69.69
  -7   0   7  145.59   60.99
   7   0  -7  215.18   31.60
  -7   0   7  187.28   15.30
  -7   0   6  305.87   20.60
  -7   0   6  327.57   66.09
   7   0  -6  269.77   22.80
   7   0  -6  314.17   38.30
   7   0  -6  326.77   63.79
   7   0  -6  290.07   21.30
   7   0  -5  120.69   37.40
  -7   0   5  126.19   10.50
  -7   0   5   54.99   46.80
   7   0  -5  101.49   14.90
   7   0  -5   98.59   11.60
   7   0  -5  199.78   73.09
  -7   0   4  310.27   58.29
   7   0  -4  294.97   62.79
   7   0  -4  209.78   19.70
  -7   0   4  222.18   15.80
   7   0  -4  226.48   16.30
   7   0  -4  247.98   49.50
   7   0  -3  271.17   55.79
  -7   0   3  264.77   18.10
   7   0  -3  250.37   44.10
  -7   0   3  250.87   55.19
   7   0  -3  264.67   18.00
   7   0  -2 3686.93  249.97
   7   0  -2 4058.79  254.17
   7   0  -2 4086.19  238.18
  -7   0   2 4664.83  257.87
   7   0  -1  512.85   52.19
  -7   0   1  589.54   35.20
   7   0  -1  552.24   34.00
   7   0  -1  556.64   57.69
   7   0   0   47.00   37.00
   7   0   0   51.59   25.20
   7   0   0   59.89    7.70
  -7   0   0   55.89    7.30
  -7   0  -1 1978.40  116.09
   7   0   1 1876.11  114.29
   7   0   1 2255.37  124.79
   7   0   1 1777.02  115.39
   7   0   2   85.79   36.90
   7   0   2  135.89   45.30
   7   0   2   93.39    9.10
   7   0   2  126.89   27.60
  -7   0  -2   99.19   10.70
   7   0   2   81.39   13.60
   7   0   3    0.20    8.60
   7   0   3   -0.90    5.70
  -7   0  -3    1.30    7.00
   7   0   3   58.89   51.79
   7   0   3  -15.50   17.90
   7   0   4  271.37   21.00
   7   0   4  276.57   18.80
   7   0   4  300.77   37.40
  -7   0  -4  294.47   20.90
   7   0   5    0.50   20.80
   7   0   5    6.40    7.70
  -7   0  -5   -3.30    9.40
   7   0   5   -6.80   11.20
  -7   0  -5   12.00   20.40
  -7   0  -6  376.46   37.00
   7   0   6  401.26   26.60
   7   0   6  357.86   46.30
   7   0   6  378.46   41.60
   7   0   7    9.20   23.60
   7   0   7    5.10   24.80
   7   0   7   14.10   15.40
   7   0   8   41.80   26.40
   7   0   8   58.39   25.90
   7   0   9  151.88   31.00
   7   0   9  112.09   28.50
   7   0  10   -2.80   16.90
   7   0  10   28.80   17.70
   7   0  11   84.69   18.90
   7   0  11   16.20   14.10
   7   0  12   11.70    8.40
   7   1 -15   21.20   13.30
   7  -1 -15  -11.70   10.20
   7   1 -14   13.60   15.40
  -7  -1  14   11.10   11.80
   7  -1 -14   14.60   15.00
  -7   1  13  207.38   41.20
   7   1 -13  208.98   28.10
   7  -1 -13  218.98   27.80
  -7   1  12   24.50   22.90
  -7   1  12  -21.20   24.40
   7   1 -12   12.20   19.50
   7  -1 -12   -4.80   16.00
  -7  -1  12   13.20   15.40
   7   1 -11  126.79   29.00
  -7   1  11  160.28   32.80
  -7   1  11  163.88   38.80
  -7  -1  11  228.38   33.60
   7  -1 -11  160.58   29.60
  -7  -1  11  163.28   18.60
  -7   1  10   34.90   45.10
  -7   1  10  -36.20  106.39
   7   1 -10  138.79   28.60
  -7  -1  10   94.69   33.10
   7  -1 -10   82.19   23.20
  -7  -1  10   -9.90   92.39
   7  -1 -10   95.59   14.50
   7   1  -9   24.00   22.80
  -7   1   9   49.70   34.90
  -7   1   9   -2.70   13.30
  -7   1   9    0.80   29.20
  -7   1   9   44.90   95.49
   7  -1  -9   21.60    8.60
   7  -1  -9   10.50   10.00
  -7  -1   9    9.10    7.70
   7  -1  -9   43.50   21.30
  -7  -1   9   -7.10   79.19
  -7   1   8  280.47   22.00
  -7   1   8  121.59   78.29
  -7   1   8  257.87   51.19
   7   1  -8  229.58   35.30
  -7  -1   8  372.36   86.09
   7  -1  -8  318.37   21.70
   7  -1  -8  333.37   20.80
  -7   1   7   31.90   64.59
  -7   1   7  141.69   13.40
   7   1  -7  159.58   33.40
  -7   1   7  137.59   33.10
   7  -1  -7  157.18   14.70
   7  -1  -7  176.68   34.20
  -7  -1   7  233.08   65.19
  -7  -1   7  172.18   13.50
  -7  -1   7  146.89   13.70
  -7  -1   7  124.09   13.90
   7  -1  -7  158.68   12.90
   7  -1  -7  229.68   79.29
  -7   1   6  276.37   33.70
   7   1  -6  243.98   37.90
  -7   1   6  292.37   18.80
  -7   1   6  272.87   65.89
   7  -1  -6  226.08   64.79
   7  -1  -6  239.38   39.90
   7  -1  -6  253.47   20.00
  -7  -1   6  247.68   18.40
  -7  -1   6  185.38   58.39
  -7  -1   6  258.47   18.20
   7  -1  -6  260.67   17.90
  -7   1   5  121.79   26.90
  -7   1   5  172.28   54.39
   7   1  -5  119.79   36.50
   7   1  -5  133.69   32.40
  -7   1   5  114.19   11.40
  -7  -1   5  181.28   61.69
   7  -1  -5  138.79   11.40
  -7  -1   5  153.28   12.60
   7  -1  -5  138.29   14.80
   7  -1  -5  157.38   47.10
   7  -1  -5  237.48   58.49
  -7  -1   5  154.08   47.40
  -7  -1   5  152.68   12.00
   7   1  -4   58.79   28.70
  -7   1   4   46.20   19.00
  -7   1   4   41.80    6.70
  -7  -1   4   43.10    9.30
   7  -1  -4   53.29    9.40
  -7  -1   4   90.89   42.90
   7  -1  -4  -53.19   37.10
   7  -1  -4   41.40   34.80
  -7  -1   4   51.79    7.30
  -7  -1   4   84.39   49.70
   7   1  -3  894.11   76.39
  -7   1   3 1045.30   61.69
   7  -1  -3  867.91   81.99
  -7  -1   3 1038.30   59.99
  -7  -1   3 1056.99   91.29
  -7  -1   3 1036.30   61.49
   7  -1  -3 1037.80   80.89
   7  -1  -3 1044.90   60.39
  -7  -1   3 1142.39   88.29
  -7  -1   3 1035.90   61.39
   7   1  -2  514.85   52.19
  -7   1   2  585.74   35.90
  -7  -1   2  593.34   35.80
   7  -1  -2  607.24   55.29
  -7  -1   2  633.04   67.49
  -7  -1   2  632.44   69.99
   7  -1  -2  556.64   57.69
   7  -1  -2  559.14   34.60
  -7  -1   2  539.05   34.30
   7   1  -1  -12.70   20.40
  -7   1   1    7.50    4.40
  -7  -1   1    8.50   40.00
   7  -1  -1    8.90    4.90
  -7  -1   1    4.00    4.70
  -7  -1   1    8.40    4.50
  -7  -1   1  -14.70   50.89
   7  -1  -1  -11.80   31.10
   7  -1  -1  -12.60   27.90
  -7   1   0  212.98   15.90
  -7   1   0  216.38   23.60
  -7  -1   0  223.48   16.30
  -7  -1   0  221.18   14.90
   7  -1   0  217.38   15.10
  -7  -1   0  339.67   63.99
   7  -1   0  196.58   38.00
   7  -1   0  196.58   50.19
  -7   1  -1   46.00    7.40
   7   1   1   56.89   22.20
   7  -1   1   49.70   39.40
  -7  -1  -1   53.29    8.20
   7  -1   1   39.90    9.90
   7  -1   1   64.29   30.30
  -7  -1  -1  -26.70   65.29
  -7  -1  -1   49.80    8.00
  -7   1  -2  415.16   25.40
   7   1   2  373.76   38.70
  -7  -1  -2  355.26   25.60
  -7  -1  -2  343.87   24.50
   7  -1   2  383.56   23.60
   7  -1   2  371.96   26.40
   7  -1   2  378.96   69.19
  -7  -1  -2  392.16   24.90
   7   1   3  290.87   33.20
  -7   1  -3  248.58   20.00
   7  -1   3  323.97   55.89
   7  -1   3  289.17   18.40
  -7  -1  -3  274.57   20.80
  -7  -1  -3  297.07   21.20
   7  -1   3  281.97   65.69
   7  -1   3  348.47   38.50
   7  -1   3  281.17   21.40
   7   1   4  394.66   39.00
  -7   1  -4  395.56   27.50
  -7  -1  -4  418.86   28.40
   7  -1   4  357.26   69.69
   7  -1   4  377.46   27.60
   7  -1   4  394.26   25.10
   7  -1   4  458.45   41.20
   7   1   5   60.19   22.10
  -7   1  -5   51.59   17.60
   7   1   5   30.90   28.10
   7  -1   5  105.09   27.90
   7  -1   5   72.29    8.00
  -7  -1  -5   78.89   13.50
   7  -1   5   69.09   11.90
   7  -1   5  134.29   65.59
  -7   1  -6    4.10   15.90
   7   1   6  -18.70   20.00
   7   1   6    7.10   25.20
   7  -1   6    2.60   25.20
   7  -1   6    5.00    4.80
   7  -1   6   -1.40    6.90
  -7  -1  -6    9.40   13.60
   7   1   7  179.78   33.20
   7   1   7  134.09   42.30
   7  -1   7  216.48   16.70
   7  -1   7  313.37   56.39
   7   1   8  418.06   46.80
   7   1   8  337.47   41.30
   7  -1   8  385.16   25.70
   7  -1   8  367.56   40.90
   7   1   9   18.40   18.60
   7   1   9    3.60   18.90
   7   1   9    4.70   21.10
   7  -1   9    2.50   18.60
   7   1  10   54.29   19.00
   7   1  10   34.20   23.30
   7  -1  10   68.99   16.70
   7  -1  10   22.40   26.90
   7   1  11    1.20   10.80
   7   1  11   -3.60   12.10
   7  -1  11   -5.50   15.80
   7  -1  11    3.40   10.30
   7   1  12   14.50    9.10
   7   1  12   -2.50    9.00
   7  -1  12   14.10    6.90
   7   2 -14   -8.50   15.40
  -7   2  14   58.79   19.10
   7  -2 -14   13.10   12.60
  -7  -2  14   22.80   10.20
   7   2 -13    5.70   14.60
  -7   2  13    1.00   14.30
  -7  -2  13    7.70   11.70
   7  -2 -13  -10.10   13.40
   7   2 -12   62.39   21.40
  -7  -2  12  101.79   24.20
  -7  -2  12   78.99   12.60
  -7   2  11  238.88   46.10
  -7   2  11  182.48   35.70
   7   2 -11  126.39   37.20
  -7   2  10  210.98   33.50
   7   2 -10  194.58   32.40
  -7   2  10  198.08   46.20
   7  -2 -10  206.48   30.70
  -7  -2  10  156.48   14.60
   7  -2 -10  188.48   16.20
   7  -2 -10  180.88   16.30
  -7   2   9   84.09   30.20
  -7   2   9   87.19   27.60
   7   2  -9   65.19   26.40
  -7   2   9   95.49   34.80
  -7   2   9   56.79   14.30
   7  -2  -9   77.59   12.80
   7  -2  -9   83.09   24.20
   7  -2  -9   68.99   12.80
  -7  -2   9   64.99   10.30
  -7  -2   9  156.98   95.19
  -7   2   8   12.70   10.80
   7   2  -8   -9.20   22.10
  -7   2   8   29.70   27.70
  -7   2   8    3.40   22.50
  -7   2   8    9.70   32.10
  -7   2   8   17.00   31.10
  -7  -2   8   36.10   80.69
   7  -2  -8  -78.39   86.19
   7  -2  -8    7.60   23.00
   7  -2  -8   11.50    6.50
   7  -2  -8   21.90    8.40
  -7  -2   8    6.10    6.30
  -7  -2   8   13.80    6.10
  -7   2   7  401.36   50.99
  -7   2   7  455.55   30.30
   7   2  -7  388.76   43.00
  -7   2   7  366.36   39.30
  -7   2   7  449.56   59.79
  -7   2   7  406.16   55.19
  -7  -2   7  382.56   86.99
   7  -2  -7  479.75   28.00
   7  -2  -7  461.25   29.70
   7  -2  -7  393.86   79.49
  -7  -2   7  247.58   79.49
  -7  -2   7  477.65   28.50
  -7  -2   7  455.05   27.60
   7  -2  -7  433.16   45.00
  -7   2   6   54.49    9.30
  -7   2   6   34.70   19.10
   7   2  -6   58.29   26.50
  -7  -2   6   56.79    9.30
  -7  -2   6   36.60    7.10
  -7  -2   6   16.50   11.10
   7  -2  -6   35.20   49.80
  -7  -2   6   -6.60   60.09
   7  -2  -6   49.99    9.80
  -7  -2   6   52.39   57.69
   7  -2  -6   39.40    6.60
  -7   2   5    7.00    6.50
   7   2  -5   20.90   24.70
  -7   2   5   29.70   19.20
   7  -2  -5   16.60    9.90
   7  -2  -5   14.90    5.50
  -7  -2   5    3.40    6.90
   7  -2  -5   31.40   41.40
  -7  -2   5   17.00    4.70
  -7  -2   5   22.20    6.50
  -7  -2   5  -27.60   47.80
  -7  -2   5   72.29   52.49
   7   2  -4  359.56   44.20
  -7   2   4  430.36   37.20
  -7   2   4  403.16   27.70
  -7  -2   4  458.35   73.99
   7  -2  -4  522.35   81.59
  -7  -2   4  391.46   63.59
   7  -2  -4  416.26   26.30
  -7  -2   4  434.16   25.90
  -7  -2   4  469.65   27.90
   7  -2  -4  437.86   56.89
   7  -2  -4  371.56   29.70
  -7  -2   4  420.56   27.00
   7   2  -3  159.78   36.90
  -7   2   3  159.28   13.20
  -7   2   3  169.78   22.90
   7  -2  -3  224.68   46.30
  -7  -2   3  164.78   11.60
  -7  -2   3  156.18   13.30
   7  -2  -3   92.59   33.30
  -7  -2   3  164.18   50.49
   7  -2  -3  175.68   12.70
  -7  -2   3  159.68   13.30
   7  -2  -3  140.49   20.80
  -7   2   2  313.87   29.60
  -7   2   2  322.97   22.40
   7   2  -2  273.57   40.20
  -7  -2   2  352.06   22.10
  -7  -2   2  254.77   62.79
   7  -2  -2  254.47   63.89
   7  -2  -2  387.76   44.20
  -7  -2   2  313.37   22.30
  -7  -2   2  310.47   60.39
   7  -2  -2  361.86   21.30
   7   2  -1  343.37   47.80
  -7   2   1  429.86   28.10
  -7   2   1  416.76   34.30
   7  -2  -1  413.76   44.30
  -7  -2   1  453.35   26.10
   7  -2  -1  368.16   69.89
  -7  -2   1  453.55   27.30
   7  -2  -1  387.06   26.90
  -7  -2   1  448.16   28.30
  -7  -2   1  524.85   63.79
  -7   2   0  185.48   23.10
   7   2   0  179.58   34.50
  -7   2   0  191.18   14.60
   7  -2   0  201.18   13.40
   7  -2   0   94.29   51.09
  -7  -2   0  144.39   50.69
  -7  -2   0  153.58   14.60
  -7  -2   0  202.28   12.70
   7  -2   0  195.58   35.20
  -7  -2   0  164.98   14.50
   7   2   1  357.76   41.60
  -7   2  -1  371.46   30.90
   7   2   1  377.56   57.99
  -7   2  -1  362.26   24.50
  -7  -2  -1  366.96   25.20
   7  -2   1  320.97   28.50
   7  -2   1  365.66   22.90
  -7  -2  -1  375.16   22.40
   7  -2   1  257.97   62.49
   7  -2   1  319.77   44.80
   7   2   2   -9.20   46.90
   7   2   2   -4.00   20.10
  -7   2  -2   -5.90    6.90
  -7  -2  -2   -8.30    7.00
   7  -2   2    5.20   30.40
  -7  -2  -2  -18.00   69.29
  -7  -2  -2   11.60    5.30
   7  -2   2   -8.00   10.90
  -7  -2  -2   -3.80    4.50
   7  -2   2    5.10    4.90
   7   2   3   91.69   57.79
  -7   2  -3  166.38   14.90
   7   2   3  143.79   30.10
  -7  -2  -3  135.69   15.10
   7  -2   3  154.28   11.60
  -7  -2  -3  150.18   12.30
  -7  -2  -3  156.28   13.60
  -7  -2  -3  129.99   90.39
   7  -2   3  185.88   46.30
   7  -2   3  161.88   17.00
  -7   2  -4  102.99   33.40
   7   2   4  200.98   43.30
   7   2   4  162.38   29.80
  -7   2  -4  194.08   28.90
   7   2   4  130.29   82.99
  -7   2  -4  121.19   25.00
   7  -2   4  181.38   50.59
   7  -2   4  154.98   11.80
  -7  -2  -4  128.49   14.10
   7  -2   4  201.78   36.60
  -7  -2  -4  172.58   17.10
  -7  -2  -4  179.08   14.00
   7   2   5   14.60   20.60
  -7   2  -5    4.20   16.90
  -7   2  -5   18.20   29.40
  -7   2  -5   11.90   15.80
   7   2   5   -1.40   28.00
  -7  -2  -5    8.50    8.10
  -7  -2  -5    1.30    9.00
  -7  -2  -5   -5.30   11.10
   7  -2   5  -25.80   57.79
   7  -2   5    3.50    4.60
   7  -2   5    9.80    8.90
   7  -2   5  -10.10   24.70
   7   2   6  298.47   42.50
  -7   2  -6  320.47   30.80
  -7   2  -6  273.07   52.29
   7   2   6  296.67   38.60
   7  -2   6  344.87   23.70
  -7  -2  -6  372.46   29.50
   7   2   7    0.10   22.40
  -7   2  -7   24.20   13.90
   7   2   7    6.60   20.60
  -7   2  -7   -1.90   27.40
   7   2   7    9.90   30.40
   7  -2   7   21.40    6.70
   7  -2   7  -12.70   99.79
   7  -2   7    0.90    4.60
   7   2   8   32.30   24.20
  -7   2  -8   88.89   28.00
   7   2   8  134.59   30.50
  -7   2  -8  115.89   19.50
   7  -2   8   79.19   11.30
   7  -2   8   72.19    9.50
   7  -2   8   62.39   22.40
   7   2   9    9.60   18.10
   7   2   9   31.80   23.40
   7   2   9    7.90   16.30
   7  -2   9   26.40   22.50
   7  -2   9   32.90    7.10
   7   2  10    9.10   12.80
   7   2  10    9.50   18.50
   7   2  10   16.60   16.10
   7  -2  10   15.20    7.70
   7   2  11   49.99   13.60
   7   2  11   42.80   11.80
   7  -2  11   79.59   16.90
   7   3 -13   78.69   26.60
  -7   3  13   78.59   18.50
  -7  -3  13  114.59   18.20
   7   3 -12   11.90   14.80
  -7   3  12   11.30   13.70
  -7  -3  12   32.60   16.00
   7  -3 -12   20.60    7.80
  -7  -3  12   15.10    7.30
   7  -3 -12   11.70   16.00
  -7   3  11   31.00   16.80
   7   3 -11   16.10   18.20
   7  -3 -11    3.90    8.80
   7  -3 -11   23.80   17.80
  -7  -3  11   39.30    8.30
   7  -3 -11   18.50    7.00
  -7   3  10   27.50   19.40
  -7   3  10   41.60   37.30
  -7   3  10   15.80   20.20
   7   3 -10   21.30   29.70
  -7  -3  10   26.60    7.70
   7  -3 -10   62.19   10.50
  -7   3   9    6.50   20.30
  -7   3   9  -17.00   21.60
  -7   3   9    1.60   18.50
   7   3  -9   27.60   22.30
  -7   3   9   17.20   36.50
  -7  -3   9    2.40    6.10
  -7  -3   9   11.50    6.10
   7  -3  -9   -1.40   22.40
   7  -3  -9    9.70  121.09
   7  -3  -9   17.40    7.80
   7  -3  -9    9.10    6.50
  -7   3   8  171.78   29.50
   7   3  -8  149.09   34.20
  -7   3   8  154.58   19.60
  -7  -3   8  166.88   17.70
   7  -3  -8  219.18   17.00
  -7  -3   8  369.36  103.29
   7  -3  -8  209.28   98.29
   7  -3  -8  188.38   17.10
  -7  -3   8  108.39   97.89
  -7  -3   8  218.98   15.80
   7  -3  -8  223.98   36.00
   7   3  -7  172.78   32.60
  -7   3   7  184.88   30.20
  -7   3   7  159.68   17.00
  -7   3   7  144.49   35.20
  -7   3   7  151.28   36.40
  -7   3   7  108.79   36.40
  -7  -3   7  179.28   13.30
   7  -3  -7  208.38   72.69
   7  -3  -7  208.08   17.60
  -7  -3   7   65.79   71.29
  -7  -3   7  191.18   14.80
   7  -3  -7  164.78   13.80
  -7   3   6  333.47   55.49
  -7   3   6  360.06   44.20
  -7   3   6  322.07   24.40
  -7   3   6  370.56   36.00
   7   3  -6  333.57   39.10
  -7   3   6  274.17   38.00
  -7  -3   6  383.86   81.79
  -7  -3   6  308.07   22.00
   7  -3  -6  298.87   21.00
  -7  -3   6  301.27   20.40
   7  -3  -6  190.78   60.89
  -7  -3   6  231.28   78.19
   7  -3  -6  327.37   24.60
  -7   3   5  228.98   47.90
   7   3  -5  230.88   37.70
  -7   3   5  277.47   40.10
  -7   3   5  262.27   29.60
  -7   3   5  230.48   40.70
   7  -3  -5  297.27   58.59
  -7  -3   5  230.58   18.80
   7  -3  -5  269.57   23.40
   7  -3  -5  249.78   17.40
  -7  -3   5  107.79   51.69
  -7  -3   5  341.77   82.79
  -7   3   4   42.10   24.00
  -7   3   4   16.40    8.20
  -7   3   4   10.50   16.40
   7   3  -4    0.70   22.90
  -7   3   4   17.30   34.20
  -7   3   4   49.10   24.00
  -7  -3   4   13.60   44.40
  -7  -3   4   26.20    9.30
   7  -3  -4  -14.10   37.30
   7  -3  -4   16.70    6.20
  -7  -3   4   21.60    6.60
  -7  -3   4   -8.70   65.19
  -7  -3   4   13.70    4.50
  -7   3   3  733.23   50.29
  -7   3   3  682.73   43.50
   7   3  -3  640.64   55.19
   7  -3  -3  649.93   40.90
  -7  -3   3  532.35   88.39
  -7  -3   3  648.84   41.50
  -7  -3   3  701.73   75.19
   7  -3  -3  739.53   64.89
  -7  -3   3  697.13   40.60
  -7  -3   3  693.03   43.30
   7   3  -2   69.79   26.50
  -7   3   2   38.90   16.30
  -7   3   2   58.49   10.50
  -7  -3   2   16.40   59.19
  -7  -3   2   56.49   10.00
   7  -3  -2   45.40    9.00
  -7  -3   2   53.49   46.20
  -7  -3   2   48.10   10.60
   7  -3  -2    7.60   31.30
  -7   3   1  144.09   14.00
  -7   3   1  159.48   22.00
   7   3  -1  135.29   36.00
   7   3  -1  131.99   35.10
  -7  -3   1  147.39   14.10
   7  -3  -1  145.79   12.30
  -7  -3   1  190.78   56.49
   7  -3  -1  148.69   34.00
  -7  -3   1  142.99   13.60
   7   3   0  181.98   37.00
  -7   3   0  226.48   18.90
   7   3   0  210.78   41.20
  -7   3   0  252.57   26.50
   7  -3   0  262.47   39.40
  -7  -3   0  236.28   19.30
  -7  -3   0  221.88   17.30
  -7  -3   0  232.18   15.40
  -7  -3   0  355.36   78.19
   7  -3   0  239.78   16.70
   7   3   1   39.70   25.60
   7   3   1   49.80   26.50
  -7   3  -1   17.50   29.90
  -7   3  -1   48.60   17.20
  -7   3  -1   55.09   10.50
  -7   3  -1   16.10   20.00
   7   3   1  103.29   58.59
  -7   3  -1   84.39   22.50
   7  -3   1   22.10   29.80
  -7  -3  -1   31.50    6.20
   7  -3   1   61.69    8.60
  -7  -3  -1   48.80   10.80
  -7  -3  -1   20.60   59.39
  -7   3  -2  368.66   51.99
   7   3   2  482.15   86.29
   7   3   2  394.66   46.40
   7   3   2  372.56   43.40
  -7   3  -2  475.75   40.20
  -7   3  -2  470.35   37.30
  -7   3  -2  428.16   37.90
  -7  -3  -2  525.55   89.89
  -7  -3  -2  376.26   39.50
  -7  -3  -2  432.36   27.20
  -7  -3  -2  396.86   25.90
   7  -3   2  432.16   26.40
   7  -3   2  392.16   53.89
  -7  -3  -2  402.26   30.20
  -7   3  -3  205.98   32.80
   7   3   3  182.18   38.80
  -7   3  -3  207.38   29.90
   7   3   3  186.38   32.70
  -7   3  -3  182.68   41.00
   7   3   3  209.58   45.50
   7  -3   3  243.88   15.90
  -7  -3  -3  299.07   94.59
  -7  -3  -3  190.98   20.20
  -7  -3  -3  247.18   15.70
   7  -3   3  175.08   46.70
  -7  -3  -3  250.67   17.00
   7  -3   3  252.07   27.60
  -7   3  -4   33.40   15.70
   7   3   4  -44.20   86.59
   7   3   4   54.79   30.10
   7   3   4   72.69   37.10
  -7   3  -4   25.60   18.50
   7   3   4   30.20   22.70
  -7   3  -4   21.00   25.60
   7  -3   4   65.59   47.60
  -7  -3  -4   64.29    8.50
   7  -3   4   37.80   29.90
  -7  -3  -4   46.00    9.30
  -7  -3  -4  -14.60  101.99
   7  -3   4   49.90    7.50
  -7  -3  -4   71.59   16.20
   7  -3   4   59.99   11.90
   7   3   5   -2.40   28.80
   7   3   5   75.49   50.29
   7   3   5   49.70   23.60
  -7   3  -5   67.39   37.40
  -7  -3  -5    5.00   14.90
   7  -3   5   56.49   10.70
   7  -3   5   88.19   59.59
   7  -3   5   47.40    9.60
  -7  -3  -5   40.60    8.10
  -7   3  -6   17.00   23.30
   7   3   6   11.40   20.80
   7   3   6   22.30   24.20
  -7   3  -6   30.00   13.40
   7  -3   6   10.50    4.80
   7  -3   6  150.08   79.09
  -7  -3  -6   22.60    7.20
   7  -3   6   27.40    9.30
  -7  -3  -6   26.40    9.00
   7   3   7   12.00   21.60
  -7   3  -7   38.50   13.20
  -7   3  -7   20.20   21.20
   7   3   7    1.80   21.80
   7  -3   7    3.30    8.10
   7  -3   7   73.19  102.19
   7  -3   7   25.60    5.00
  -7   3  -8   55.39   20.70
   7   3   8   47.20   19.00
  -7   3  -8   67.29   16.00
   7   3   8   80.49   21.70
   7  -3   8   71.59    9.80
   7  -3   8   60.79    7.90
  -7   3  -9    8.30   14.60
   7   3   9    3.60   16.10
   7  -3   9   26.40    6.60
   7  -3   9   20.70    5.90
   7   3  10   49.30   19.70
  -7   3 -10   41.70   17.50
   7  -3  10   75.29   10.30
   7   4 -12   45.80   17.70
   7  -4 -12   67.69   10.20
  -7  -4  12   90.09   17.90
   7  -4 -12   41.90   17.00
  -7  -4  12   76.59   10.20
  -7   4  11   13.10   12.70
   7   4 -11   19.30   16.60
  -7   4  11   30.90   14.20
  -7   4  11    2.40   17.20
   7  -4 -11    6.60    8.00
  -7  -4  11   20.80    5.10
  -7  -4  11    9.80    9.40
   7  -4 -11    5.10   19.30
   7  -4 -11   43.10    8.80
  -7   4  10   57.59   23.70
  -7   4  10   21.20   15.30
  -7   4  10   47.90   20.00
   7   4 -10   19.50   18.90
  -7  -4  10   36.00    6.30
   7  -4 -10   43.50    8.00
   7  -4 -10   41.30    7.70
  -7  -4  10   27.90   12.90
  -7   4   9  151.68   28.90
  -7   4   9  203.78   30.60
   7  -4  -9  222.38   16.00
  -7  -4   9  195.98   15.30
  -7  -4   9  204.28   15.90
   7  -4  -9  230.68   17.40
  -7   4   8    1.00   18.10
  -7   4   8  -11.30   17.10
  -7   4   8   18.80   17.60
   7   4  -8    9.70   22.10
   7  -4  -8    7.20    6.30
  -7  -4   8   74.09  106.29
  -7  -4   8    9.40    6.40
   7  -4  -8   11.40    8.60
   7  -4  -8   44.20  107.09
  -7  -4   8    8.20    5.80
   7   4  -7   35.40   24.60
  -7   4   7   42.80   19.90
  -7   4   7   41.10   18.50
  -7  -4   7   74.99    8.70
   7  -4  -7   83.79   10.00
  -7  -4   7   62.19   10.50
   7  -4  -7   83.39   14.70
   7  -4  -7   89.49   83.09
  -7  -4   7   37.70   83.69
  -7   4   6   75.19   22.00
  -7   4   6  106.59   25.20
  -7   4   6  115.29   27.50
  -7   4   6   84.59   17.80
  -7   4   6   90.89   59.49
   7   4  -6   74.49   28.30
  -7  -4   6  166.28  103.59
   7  -4  -6  130.49   18.00
  -7  -4   6  119.59   12.40
   7  -4  -6  112.49   11.30
   7  -4  -6  200.88   69.29
  -7  -4   6   97.49   71.49
  -7  -4   6  116.09   10.40
  -7   4   5   57.19   21.80
  -7   4   5   55.89   32.30
  -7   4   5   51.69   13.90
  -7   4   5   62.09   21.90
   7   4  -5   61.09   26.50
  -7   4   5   68.39   20.10
  -7  -4   5   63.79   10.50
   7  -4  -5   48.30   10.00
  -7  -4   5   30.20   94.09
   7  -4  -5   49.20   58.29
  -7   4   4  131.49   23.70
  -7   4   4  151.88   17.50
  -7   4   4  149.29   30.10
  -7   4   4  118.39   35.20
  -7   4   4  127.29   31.50
   7   4  -4   91.59   29.50
  -7  -4   4  129.29   10.60
  -7  -4   4  133.29   55.09
  -7  -4   4   80.29   94.99
   7  -4  -4  113.39   54.99
   7  -4  -4  151.88   12.60
  -7  -4   4  111.69   13.30
   7   4  -3   48.40   27.10
  -7   4   3   73.99   15.60
  -7   4   3  118.29   29.00
  -7   4   3  102.99   23.70
  -7   4   3   86.59   22.90
  -7   4   3   77.49   33.30
  -7  -4   3   66.79    8.10
  -7  -4   3  149.88   87.49
  -7  -4   3   82.39   16.40
  -7  -4   3   22.90   58.49
  -7  -4   3   85.09   11.50
   7  -4  -3   74.59   43.90
   7  -4  -3  107.29   10.70
  -7   4   2  206.48   25.50
  -7   4   2  209.28   19.00
  -7   4   2  178.38   43.00
   7   4  -2  222.38   37.00
  -7   4   2  237.68   32.70
  -7   4   2  149.99   30.30
  -7  -4   2  177.68   19.90
   7  -4  -2  176.88   15.20
  -7  -4   2  115.79   61.89
   7  -4  -2  111.59   40.60
  -7  -4   2   46.20   83.59
  -7  -4   2  164.88   15.30
  -7   4   1   76.89   15.50
  -7   4   1  112.69   26.30
  -7   4   1   93.29   22.20
   7   4  -1  104.49   27.70
  -7   4   1  105.69   30.00
  -7   4   1  114.29   22.40
  -7  -4   1   91.89   11.90
   7  -4  -1  110.79   11.90
   7  -4  -1   78.29   38.80
  -7  -4   1   94.29   15.30
  -7  -4   1   56.69   59.29
   7   4   0   44.60   30.20
  -7   4   0   99.99   22.70
  -7   4   0  106.89   28.80
  -7   4   0  123.89   22.60
   7   4   0  115.69   27.90
  -7   4   0  133.99   22.70
   7  -4   0   97.39   11.90
  -7  -4   0   91.49    8.70
  -7  -4   0   75.29   17.00
   7  -4   0   86.09   36.50
  -7  -4   0  103.39   11.60
  -7  -4   0   33.50   65.89
  -7   4  -1  260.67   33.90
   7   4   1  205.78   35.40
  -7   4  -1  244.58   32.10
  -7   4  -1  250.27   28.80
  -7   4  -1  219.58   42.20
   7  -4   1  269.17   49.20
  -7  -4  -1  273.67   79.09
  -7  -4  -1  241.48   23.70
   7  -4   1  247.98   17.90
  -7  -4  -1  226.78   15.90
  -7   4  -2    8.30   19.80
   7   4   2   -2.30   23.70
   7   4   2   22.30   83.99
  -7   4  -2   45.00   25.40
   7   4   2   13.50   22.30
  -7   4  -2   -0.30   16.60
  -7   4  -2    7.40   19.00
   7  -4   2  -31.90   41.00
   7  -4   2   10.70    6.90
  -7  -4  -2  -23.40   13.70
  -7  -4  -2   -0.40    5.60
  -7  -4  -2   13.10   23.40
   7   4   3   35.40   25.30
   7   4   3   29.20  103.49
  -7   4  -3   50.79   31.10
  -7   4  -3   94.99   21.20
   7  -4   3   28.00   45.40
   7  -4   3   82.69    9.30
  -7  -4  -3   74.29    9.50
  -7  -4  -3   68.49    8.50
  -7  -4  -3   53.39   16.60
  -7  -4  -3  102.79  103.09
  -7   4  -4  142.09   30.50
  -7   4  -4  164.48   24.40
   7   4   4  100.69   29.30
  -7   4  -4  158.18   28.60
   7   4   4  122.99   32.20
   7  -4   4  148.39   11.80
  -7  -4  -4   39.00  116.29
  -7  -4  -4  144.19   12.20
   7  -4   4  126.99   54.99
   7  -4   4  165.98   20.00
  -7  -4  -4  154.18   13.10
   7   4   5   10.50   19.90
   7   4   5   14.40   24.90
  -7   4  -5    7.90   13.10
  -7   4  -5   18.30   22.20
  -7   4  -5   17.00   17.30
   7   4   5    5.30   23.30
   7  -4   5   -0.90   10.80
   7  -4   5    3.50    5.20
  -7  -4  -5    6.20    6.40
   7  -4   5   17.10   66.59
  -7  -4  -5   -0.20    6.20
  -7   4  -6  116.39   32.40
  -7   4  -6  119.69   21.00
  -7  -4  -6  119.69   12.80
   7  -4   6  143.49   16.20
  -7  -4  -6  117.29   12.30
   7  -4   6  134.49   10.30
   7   4   7   16.50   17.00
   7   4   7    6.30   16.90
  -7   4  -7    9.20   16.70
   7   4   7   40.10   27.20
  -7   4  -7   21.30   11.00
   7  -4   7   18.30    7.00
  -7  -4  -7   23.70    6.00
   7  -4   7   40.00    6.20
  -7   4  -8    8.40   12.90
  -7   4  -8   24.40    8.60
   7   4   8   19.20   14.30
   7   4   8   47.50   17.40
   7  -4   8   25.30    6.30
   7  -4   8   38.40    7.10
  -7  -4  -8   32.70    9.00
   7   4   9    8.30   10.20
   7   4   9   13.60   15.80
  -7   4  -9   14.50   11.10
   7  -4   9   23.50    8.40
  -7   5  11   12.80    9.40
  -7   5  11   -2.30   11.90
  -7   5  11   -2.20    6.40
   7   5 -11   -5.30   12.70
   7  -5 -11   15.50    5.00
  -7  -5  11   14.80    4.20
  -7  -5  11   34.00   13.60
  -7  -5  11   13.50    5.30
  -7   5  10   15.40   19.00
  -7   5  10   25.20   11.60
   7   5 -10   18.40   17.90
  -7  -5  10   23.50    6.80
   7  -5 -10   12.80    5.40
  -7  -5  10   16.70   12.00
  -7  -5  10   25.40    7.80
  -7  -5  10   22.30    5.00
   7  -5 -10    2.40    6.30
  -7   5   9   12.80   12.60
  -7   5   9   16.70   13.40
   7   5  -9   12.70   18.60
  -7   5   9    2.30   12.80
   7  -5  -9   22.50    6.50
   7  -5  -9   14.30    6.60
  -7  -5   9   22.70    5.70
  -7  -5   9   51.89   16.10
  -7  -5   9   37.20    7.00
  -7   5   8   36.10   14.40
   7   5  -8   33.30   22.80
  -7   5   8   35.10   15.30
  -7  -5   8   71.89    9.10
   7  -5  -8   68.49   11.40
  -7  -5   8   68.39    8.40
   7  -5  -8   73.29    9.40
  -7   5   7   42.10   15.80
   7   5  -7    6.80   20.80
  -7   5   7   17.30   15.20
  -7   5   7   45.00   18.20
  -7  -5   7   51.29    7.70
   7  -5  -7   56.09    7.90
  -7  -5   7   45.30    9.20
   7  -5  -7   38.80    9.20
  -7   5   6   18.80   17.00
  -7   5   6   27.50   18.30
  -7   5   6   32.50   15.80
   7   5  -6   25.00   27.70
   7  -5  -6   63.49    9.90
  -7  -5   6   59.09    7.90
   7  -5  -6   44.00   11.00
  -7  -5   6   53.09    9.60
  -7   5   5  107.19   20.90
  -7   5   5   80.99   22.10
   7  -5  -5  101.69   11.40
  -7  -5   5   90.99    9.30
  -7  -5   5   83.69   76.29
   7  -5  -5  147.49   76.49
  -7   5   4   13.10   30.40
  -7   5   4    3.30   15.40
  -7   5   4   -2.50   15.90
  -7   5   4   25.60   19.10
   7   5  -4   10.20   22.40
  -7  -5   4    5.80    7.00
   7  -5  -4   64.59   67.49
  -7  -5   4   11.00   74.39
  -7  -5   4    6.70    5.00
   7  -5  -4   16.80    7.60
  -7   5   3  116.89   26.20
  -7   5   3  117.69   25.90
   7   5  -3   74.89   26.40
  -7   5   3  105.39   22.60
  -7   5   3   49.70   29.10
  -7  -5   3  136.49   12.90
  -7  -5   3   70.09   71.09
   7  -5  -3  107.69   12.80
   7  -5  -3  106.99   62.79
  -7   5   2    9.10   16.80
  -7   5   2   11.00   16.70
   7   5  -2   14.30   21.00
  -7   5   2    5.00   15.30
  -7   5   2   -6.80   24.90
   7  -5  -2    9.30    8.50
  -7  -5   2   14.60    7.30
   7  -5  -2   74.39   54.29
  -7  -5   2  -89.89   73.79
  -7   5   1    3.80   15.40
   7   5  -1   11.70   21.80
  -7   5   1   16.30   17.10
  -7   5   1   11.10   16.20
  -7   5   1    4.50   25.10
   7  -5  -1   28.50   46.80
  -7  -5   1   -0.30    4.40
   7  -5  -1    3.30    8.30
  -7  -5   1 -112.99   76.79
  -7  -5   1    7.40    6.80
  -7   5   0  139.29   27.10
  -7   5   0  158.48   29.00
  -7   5   0  138.39   22.70
   7   5   0   63.39   24.00
   7  -5   0  118.99   13.10
   7  -5   0  100.99   51.79
  -7  -5   0  102.89    9.80
  -7  -5   0  143.79   84.69
  -7  -5   0  117.69   13.20
  -7   5  -1    4.20   19.10
   7   5   1   39.10   21.90
  -7   5  -1  -12.40   19.60
   7   5   1    3.20   24.60
  -7   5  -1   16.80   17.20
  -7   5  -1   -8.10   20.50
   7  -5   1   48.30   50.49
  -7  -5  -1   17.20    4.70
   7  -5   1   30.80    8.30
  -7  -5  -1  -83.19   87.79
  -7   5  -2  200.58   28.80
  -7   5  -2  218.78   28.10
  -7   5  -2  130.39   33.70
   7  -5   2  179.38   55.09
  -7  -5  -2  189.78   14.00
  -7  -5  -2  248.28  114.89
  -7  -5  -2  233.88   18.10
  -7  -5  -2  146.39   32.00
   7  -5   2  205.98   15.90
   7   5   3   21.00   20.40
  -7   5  -3   38.80   18.30
  -7   5  -3   72.19   16.10
  -7   5  -3   67.49   21.90
   7  -5   3   59.89    9.30
  -7  -5  -3   58.69    7.90
  -7  -5  -3   61.79    9.70
   7   5   4   15.10   20.70
   7   5   4   26.00   20.50
  -7   5  -4   32.50   23.40
  -7   5  -4   12.50   17.50
  -7   5  -4    8.40   12.10
   7  -5   4   25.00    6.00
  -7  -5  -4   37.10    6.90
  -7  -5  -4   49.30    8.10
   7  -5   4  -22.50   24.20
  -7   5  -5   62.79   20.00
   7   5   5   27.20   19.90
  -7   5  -5   51.89   14.50
   7   5   5   36.20   21.30
   7   5   5   43.50   21.40
  -7  -5  -5   47.20    8.80
   7  -5   5   37.10    6.70
  -7  -5  -5   49.50    8.10
   7  -5   5   26.40   11.90
  -7   5  -6   -2.60    8.80
   7   5   6   10.70   20.90
  -7   5  -6   -1.20   14.30
   7   5   6  -11.40   15.10
   7   5   6    9.70   15.10
   7  -5   6   -0.30    4.20
  -7  -5  -6    0.50    5.00
   7  -5   6   -2.90    7.90
  -7  -5  -6    2.50    6.40
  -7   5  -7    6.90   11.80
   7   5   7    0.30   12.60
   7   5   7    7.00   20.00
   7   5   7    4.00   13.10
  -7   5  -7   -1.20    7.70
  -7  -5  -7   13.50    4.50
   7  -5   7    0.70    4.40
   7  -5   7   11.10    7.80
   7   5   8    8.20   10.90
   7   5   8   20.70   13.40
  -7   5  -8   25.90    9.30
   7  -5   8   12.70    5.30
  -7   6   8    7.70    9.60
  -7   6   8    0.90    7.60
  -7   6   8    9.80    8.90
   7   6  -8   -1.10   13.30
  -7  -6   8    9.50    4.40
   7  -6  -8   22.60    6.60
  -7  -6   8   15.00    7.40
  -7   6   7   -1.10    8.80
  -7   6   7   11.30    9.30
  -7   6   7    3.90   11.30
   7   6  -7    5.80   14.10
   7  -6  -7   36.70    6.80
  -7  -6   7   16.90    9.60
  -7  -6   7   17.20    5.10
   7  -6  -7   29.50    8.10
  -7   6   6    4.50   11.50
  -7   6   6   17.80   11.80
  -7   6   6   11.50   10.60
   7   6  -6   12.80   17.50
  -7  -6   6   18.50    5.70
  -7  -6   6   24.40   12.20
   7  -6  -6    9.30   18.90
   7  -6  -6   35.10    7.20
  -7   6   5    5.80   12.60
  -7   6   5   -7.60   11.00
   7   6  -5    8.80   16.80
  -7   6   5   -6.30   12.70
  -7  -6   5    2.70    5.70
   7  -6  -5  -12.40    6.90
   7   6  -4   40.00   19.10
  -7   6   4   30.90   14.10
  -7  -6   4   87.59   10.40
   7  -6  -4   62.89    9.20
  -7   6   3    3.20   16.60
   7   6  -3    7.30   17.70
  -7   6   3   14.10   14.90
  -7   6   3   -1.80   11.80
  -7  -6   3   11.70    6.30
  -7  -6   3   10.20    4.80
   7  -6  -3    2.80    8.20
  -7   6   2    6.70   29.10
  -7   6   2   32.60   16.80
  -7   6   2   31.60   16.50
  -7   6   2    1.10   11.70
   7   6  -2   12.30   19.60
  -7  -6   2   14.30    5.00
   7  -6  -2    3.10    8.70
  -7  -6   2   17.50    6.50
  -7   6   1   -4.70   17.10
  -7   6   1    9.00   24.10
  -7   6   1   23.20   13.30
   7   6  -1   18.40   19.90
   7  -6  -1    7.40    9.20
  -7   6   0   22.70   22.60
  -7   6   0   18.10   15.10
   7   6   0   23.10   18.20
   7  -6   0   27.00    9.70
  -7   6  -1   16.20   21.50
  -7   6  -1    9.50   16.60
   7   6   1   11.40   18.60
  -7  -6  -1    5.30    5.10
   7  -6   1   21.90    8.50
  -7   6  -2    0.40   10.40
   7   6   2    4.70   15.30
  -7   6  -2    7.20   19.00
  -7   6  -2   -5.00   15.30
   7   6   2    7.20   22.90
   7  -6   2   -7.20    7.10
  -7  -6  -2   -1.30    5.50
  -7  -6  -2   -5.60    4.50
   7   6   3    4.60   20.60
  -7   6  -3    4.80    9.60
   7   6   3   12.50   14.90
  -7   6  -3   -8.70   12.90
  -7  -6  -3   11.10    5.40
   7  -6   3   12.60    6.60
  -7  -6  -3    1.30    5.00
   7   6   4    5.40   15.90
  -7   6  -4   19.30   10.10
  -7   6  -4   16.50   12.60
   7   6   4    4.70   18.30
  -7  -6  -4    5.80    5.90
   7  -6   4   -1.10    5.20
  -7  -6  -4   18.00    5.50
   7   6   5    4.50   14.30
  -7   6  -5    5.20    8.60
  -7   6  -5   -7.40    8.90
   7   6   5    8.80   14.30
  -7  -6  -5    7.80    4.50
   7  -6   5    5.00    7.90
   7   7  -4    1.10   11.60
  -7  -7   4    8.60   10.20
  -7   7   3  -14.20   11.90
  -7   7   3   31.80   13.20
   7   7  -3   -3.00   11.20
   7   7  -2   -3.00   14.10
  -7   7   2    2.30    9.20
  -7  -7   2   11.60    4.70
   7   7  -1   -7.10   11.30
  -7   7   1   11.70   11.50
  -7  -7   1   12.60    4.70
   7   7   0   -4.80   11.90
  -7   7   0    5.20    8.70
  -7  -7   0   15.30    5.40
   7   7   1    7.40   15.00
  -7  -7  -1   13.90    5.00
  -8   0  14   69.09   14.60
   8   0 -14  115.59   27.80
  -8   0  13   41.10   16.30
   8   0 -13    7.50   16.90
  -8   0  12  462.35   42.20
   8   0 -12  361.96   38.90
  -8   0  11   90.49   23.00
   8   0 -11   91.49   26.80
  -8   0  10  142.89  123.69
  -8   0  10    3.50   21.90
   8   0  -9  369.76   42.60
  -8   0   9  491.75   50.09
  -8   0   9  427.96  108.79
  -8   0   8  359.96   45.60
   8   0  -8  227.18   37.40
  -8   0   8  279.27   22.40
  -8   0   8  193.38   97.19
   8   0  -7   53.79   28.40
  -8   0   7   77.89   73.59
  -8   0   7   68.69   28.60
  -8   0   6  394.16   25.40
   8   0  -6  363.56   26.20
   8   0  -6  342.87   45.30
   8   0  -5   39.60   10.20
  -8   0   5   60.39    8.70
  -8   0   5   63.39   61.79
   8   0  -5    1.60   45.30
   8   0  -5   43.30    8.70
  -8   0   5   64.79   24.70
   8   0  -4  517.65   31.90
   8   0  -4  496.55   33.20
  -8   0   4  536.45   32.60
   8   0  -4  404.16   67.59
  -8   0   4  494.65   41.40
  -8   0   3    1.80   16.80
   8   0  -3   12.00    6.60
   8   0  -3   18.70   64.39
   8   0  -3   17.80    9.10
  -8   0   3   20.60    6.00
   8   0  -3   44.00   36.10
   8   0  -2   71.29   38.50
  -8   0   2   72.39    8.20
   8   0  -2   57.99    9.50
   8   0  -2   65.69   12.60
   8   0  -2   65.29   56.09
   8   0  -1  793.32  111.29
   8   0  -1  839.72   50.39
  -8   0   1  897.81   52.09
   8   0  -1  854.41   85.39
   8   0  -1  802.42   51.59
  -8   0   0    1.80    6.00
   8   0   0   -2.90   42.40
   8   0   0  -34.70   49.70
   8   0   0   11.30    7.60
   8   0   1  607.74   42.20
   8   0   1  748.53   54.59
   8   0   1  638.14   84.99
  -8   0  -1  687.03   42.50
  -8   0  -2  170.38   15.30
   8   0   2  217.98   30.80
   8   0   2  156.58   16.90
   8   0   2  173.18   13.70
  -8   0  -3    7.00   29.70
   8   0   3   11.00    6.40
   8   0   3    0.10   19.50
   8   0   3    2.60    8.70
  -8   0  -3    2.90    8.30
   8   0   4  161.98   32.30
  -8   0  -4  195.68   17.90
  -8   0  -4  159.38   34.60
  -8   0  -5   -4.70   18.30
   8   0   5    3.00   20.20
   8   0   6   31.10   26.50
   8   0   6   41.40   22.40
   8   0   6   24.10   12.90
  -8   0  -6   46.20   15.30
   8   0   7  308.07   39.10
   8   0   7  308.17   39.20
   8   0   8   18.80   23.10
   8   0   8   35.80   20.60
   8   0   9  163.58   29.30
   8   0   9  129.29   27.50
   8   0  10   -5.50   11.40
   8   0  10   12.50   14.70
   8   0  11   21.90   11.80
   8   0  11   -3.00    9.80
   8  -1 -14   16.10   17.30
  -8  -1  14    5.80    9.60
  -8   1  13   19.50   16.00
   8   1 -13    2.30   15.40
   8  -1 -13   51.69   18.80
  -8  -1  13   56.89   16.10
   8   1 -12   95.89   24.10
  -8   1  12  110.69   30.90
  -8  -1  12  126.69   27.30
   8  -1 -12   88.39   25.50
  -8   1  11   18.80   22.00
   8   1 -11  -22.00   34.30
  -8  -1  11   23.70   18.90
  -8   1  10  149.88   38.30
   8   1 -10  118.39   29.00
  -8  -1  10  -34.70  229.98
  -8  -1  10  100.49   17.60
   8  -1 -10  101.79   28.50
   8  -1 -10   74.69   14.60
   8   1  -9   31.80   24.00
  -8   1   9   33.20   26.40
   8  -1  -9   21.10   24.30
   8  -1  -9    3.70    9.30
  -8  -1   9    7.70   22.70
  -8  -1   9  109.59   96.89
  -8  -1   9   14.90   11.10
   8   1  -8  276.27   38.90
  -8   1   8  285.67   24.40
  -8   1   8  353.36   46.70
   8  -1  -8  330.47   23.40
  -8  -1   8  283.57   93.39
   8  -1  -8  287.57   39.30
  -8  -1   8  308.27   22.50
   8  -1  -8  322.87   22.20
  -8  -1   8  337.37   27.80
  -8   1   7  165.38   15.60
  -8   1   7  261.57   45.10
  -8   1   7  189.18   32.50
   8  -1  -7  166.98   16.50
   8  -1  -7  189.98   38.90
  -8  -1   7  161.08   16.60
  -8  -1   7  185.68   15.50
  -8  -1   7  198.38   22.80
   8  -1  -7  163.08   14.80
  -8  -1   7   30.80   71.89
  -8   1   6    0.70   21.20
  -8   1   6   -2.60    6.10
  -8   1   6   -4.70   30.90
   8   1  -6  -13.60   25.60
  -8  -1   6    9.50    7.00
   8  -1  -6   42.50   73.79
  -8  -1   6    5.00    7.40
   8  -1  -6   13.60    6.30
   8  -1  -6    6.80    7.90
  -8  -1   6   -4.30   15.80
  -8  -1   6   10.80   68.89
   8   1  -5  209.28   41.50
  -8   1   5  253.27   18.20
  -8   1   5  240.08   29.40
   8  -1  -5  251.77   20.00
  -8  -1   5  235.78   17.80
   8  -1  -5  261.07   17.40
   8  -1  -5  122.39   62.59
  -8  -1   5  249.28   18.00
  -8  -1   5  236.38   65.89
  -8   1   4  132.39   11.90
  -8   1   4  141.69   23.90
   8   1  -4  208.18   39.70
  -8  -1   4  118.19   16.50
  -8  -1   4  129.89   12.30
   8  -1  -4  116.09   50.09
   8  -1  -4  146.69   54.89
   8  -1  -4  105.69   14.90
  -8  -1   4  132.69   12.20
   8  -1  -4  120.89   11.20
  -8  -1   4   42.10   53.79
  -8   1   3 1556.44   93.79
   8   1  -3 1583.64  106.79
  -8   1   3 1621.64   98.89
   8  -1  -3 1614.94  116.49
  -8  -1   3 1540.85   92.29
   8  -1  -3 1515.45   93.59
   8  -1  -3 1440.36  127.69
   8  -1  -3 1601.14   92.29
  -8  -1   3 1643.64   93.79
   8   1  -2  704.83   58.59
  -8   1   2  792.22   51.29
  -8   1   2  704.63   45.50
  -8  -1   2  745.63   45.50
   8  -1  -2  727.93   46.10
  -8  -1   2  875.71   98.79
   8  -1  -2  670.53   73.19
  -8  -1   2  661.63   43.60
   8  -1  -2  765.52   44.10
  -8   1   1   87.89   18.80
   8   1  -1  132.89   28.20
  -8   1   1   81.99    9.50
   8  -1  -1   75.89   39.50
   8  -1  -1   75.89   13.50
  -8  -1   1   78.69   10.40
   8  -1  -1   67.09    8.70
  -8  -1   1   76.29    9.30
  -8  -1   1   69.29    9.80
   8  -1  -1   62.29   43.50
   8   1   0  364.66   37.00
  -8   1   0  360.26   29.50
  -8   1   0  331.87   23.00
   8  -1   0  335.17   21.40
   8  -1   0  310.87   52.09
  -8  -1   0  326.07   23.40
  -8  -1   0  311.27   22.00
   8  -1   0  301.27   59.69
   8  -1   0  316.37   24.20
   8   1   1  148.99   30.10
  -8   1  -1  131.89   13.70
  -8  -1  -1  166.48   14.10
   8  -1   1  153.98   14.90
   8  -1   1  109.89   42.90
  -8  -1  -1  141.49   14.10
   8  -1   1  151.88   11.70
  -8   1  -2   92.09   11.80
   8   1   2   87.29   24.00
   8  -1   2   77.49   12.00
  -8  -1  -2   90.49   11.30
   8  -1   2  132.19   75.49
  -8  -1  -2   70.59   13.10
   8  -1   2  116.39   46.00
   8  -1   2   80.69    8.50
   8  -1   2   97.89   25.80
   8   1   3  710.93   66.89
  -8   1  -3  714.53   51.19
  -8   1  -3  708.73   43.90
   8  -1   3  652.03   83.79
  -8  -1  -3  697.53   44.20
   8  -1   3  742.83   55.49
   8  -1   3  615.94   45.90
   8  -1   3  633.74   41.10
  -8   1  -4   48.00   19.80
   8   1   4   28.40   27.40
   8   1   4   23.60   20.90
  -8   1  -4   52.89   17.30
   8  -1   4  -46.40   63.99
  -8  -1  -4   36.10   12.10
   8  -1   4   38.40    9.40
   8  -1   4   73.99   22.70
  -8   1  -5  266.97   32.10
   8   1   5  279.17   37.50
   8   1   5  266.77   40.50
   8  -1   5  288.77   19.40
   8  -1   5  334.67   39.20
  -8  -1  -5  298.27   25.70
  -8   1  -6   -6.10   23.10
   8   1   6   44.10   39.10
   8   1   6   41.80   23.10
   8  -1   6   38.90    8.20
   8  -1   6   66.89   25.70
   8   1   7   24.70   20.90
   8   1   7   46.40   22.20
  -8   1  -7   57.09   14.30
   8   1   7   92.29   29.60
   8  -1   7   54.39   11.20
   8  -1   7   66.19   22.70
   8  -1   7   20.90   26.70
   8   1   8  105.89   25.90
   8   1   8  112.29   28.60
   8  -1   8   98.99   13.90
   8  -1   8  117.69   27.50
   8   1   9    1.20   19.70
   8   1   9   13.20   16.10
   8   1   9   -2.70   18.70
   8  -1   9   -0.20   17.90
   8   1  10   14.40   13.90
   8   1  10    2.30   13.20
   8  -1  10   37.90   16.30
   8  -1  10   15.20   12.10
   8   1  11   -0.50    9.00
   8   1  11   -4.60   12.80
   8  -1  11   -2.00    7.40
   8   2 -14   -3.90   10.00
   8  -2 -14   -5.80   13.10
   8   2 -13   10.10   15.10
  -8   2  13    6.10   14.90
   8  -2 -13    6.00   16.30
  -8   2  12   18.10   18.80
  -8   2  12   39.30   22.00
   8   2 -12   31.40   17.50
   8   2 -11    2.70   18.60
  -8   2  11    3.00   20.00
  -8   2  11    6.30   23.50
   8  -2 -11   28.20   19.00
  -8  -2  11   12.10   16.00
  -8  -2  11   11.60    8.10
  -8   2  10  128.89   26.70
   8   2 -10  100.29   27.80
   8  -2 -10   81.19   13.30
  -8  -2  10   92.09   16.50
  -8  -2  10   85.39   12.00
  -8  -2  10  124.59   30.00
   8  -2 -10   35.60   22.30
   8  -2 -10   79.59   14.20
  -8   2   9   78.79   28.90
  -8   2   9   64.79   16.40
  -8   2   9   80.49   25.30
  -8   2   9   91.09   27.80
   8   2  -9   75.09   28.60
   8  -2  -9   74.09   11.50
  -8  -2   9   89.79   11.10
   8  -2  -9   45.70   25.00
  -8  -2   9  118.49   33.40
   8  -2  -9   68.69   12.10
  -8  -2   9  138.79  116.29
   8   2  -8   91.79   26.90
  -8   2   8   72.99   23.20
  -8   2   8   87.69   28.70
  -8   2   8   69.09   15.90
  -8   2   8   65.89   27.20
  -8   2   8   72.99   32.70
   8  -2  -8   78.29   12.40
   8  -2  -8   50.89   10.20
   8  -2  -8   76.19   30.50
   8  -2  -8  134.29  114.99
  -8  -2   8   66.69   10.50
  -8  -2   8  200.38   99.59
  -8   2   7   56.09   22.00
   8   2  -7   39.40   27.00
  -8   2   7   56.09   27.90
  -8   2   7   61.49   29.90
  -8   2   7   57.99   31.60
  -8   2   7   65.59   13.00
  -8  -2   7   80.69   27.50
  -8  -2   7   51.19    9.50
   8  -2  -7   52.19   10.00
   8  -2  -7   27.50   79.09
   8  -2  -7   80.39    9.30
  -8  -2   7   68.59   10.40
  -8  -2   7   70.99   84.79
   8   2  -6  201.48   35.10
  -8   2   6  234.18   30.60
  -8   2   6  221.98   46.40
  -8   2   6  170.28   33.70
  -8   2   6  164.18   42.50
  -8  -2   6  242.08   79.09
  -8  -2   6  232.58   16.80
  -8  -2   6  229.38   26.60
  -8  -2   6  213.18   15.80
   8  -2  -6  112.89   65.89
   8  -2  -6  209.08   19.00
  -8  -2   6  113.09  112.79
   8  -2  -6  224.08   16.20
  -8  -2   6  288.47   44.00
  -8   2   5   14.60   16.60
  -8   2   5   15.10    8.20
   8   2  -5   28.10   25.40
  -8   2   5   39.60   29.00
   8  -2  -5  -40.40   52.69
  -8  -2   5    2.80    8.20
  -8  -2   5  -16.40   15.20
  -8  -2   5   15.40    7.30
   8  -2  -5   21.80    6.00
  -8  -2   5  -61.09   63.59
  -8  -2   5   74.99   65.69
   8  -2  -5    4.70    9.10
  -8   2   4  342.77   24.30
   8   2  -4  354.96   41.40
  -8   2   4  377.36   32.50
   8  -2  -4  314.07   64.69
  -8  -2   4  347.37   24.20
   8  -2  -4  336.97   22.50
   8  -2  -4  337.07   26.00
  -8  -2   4  354.16   23.20
  -8  -2   4  193.88   65.69
  -8  -2   4  477.25   84.19
   8   2  -3   24.50   28.60
  -8   2   3   14.00    7.20
  -8   2   3   32.70   16.20
  -8  -2   3   46.00   51.39
  -8  -2   3   33.90    8.10
  -8  -2   3   22.40    5.30
  -8  -2   3   32.50    6.60
   8  -2  -3   43.50   11.30
  -8  -2   3   42.50   67.99
   8  -2  -3   40.10   39.30
   8  -2  -3   45.70    7.80
  -8   2   2   78.19   19.30
   8   2  -2  104.29   33.10
   8   2  -2   72.49   31.30
  -8   2   2   88.79   10.30
  -8  -2   2   79.79   10.10
   8  -2  -2   52.69   35.70
   8  -2  -2   76.39   16.70
  -8  -2   2   67.59    8.00
   8  -2  -2   75.99    8.70
  -8  -2   2   70.99   10.00
  -8  -2   2  101.39   65.19
  -8  -2   2  104.89   61.19
   8   2  -1  336.67   49.80
  -8   2   1  467.25   35.00
  -8   2   1  411.66   27.40
  -8  -2   1  393.46   24.70
  -8  -2   1  389.36   26.00
   8  -2  -1  395.06   25.20
   8  -2  -1  456.05   56.49
   8  -2  -1  354.36   29.30
  -8  -2   1  398.36   27.30
  -8  -2   1  393.86   86.29
  -8   2   0   18.90    8.20
  -8   2   0   13.10   14.10
   8   2   0   -2.20   25.50
  -8  -2   0  110.29   70.69
   8  -2   0  -10.40   11.00
   8  -2   0   12.70   36.10
  -8  -2   0   28.80    8.70
  -8  -2   0   10.00    4.90
   8  -2   0   13.80    5.80
   8   2   1  110.39   29.70
  -8   2  -1  103.99   12.00
  -8   2  -1  106.09   26.30
  -8   2  -1  123.69   19.90
  -8  -2  -1   94.19    9.60
  -8  -2  -1   90.59   10.30
  -8  -2  -1   90.99   12.40
   8  -2   1   91.79   39.20
   8  -2   1   92.39   15.50
   8  -2   1   80.49    9.30
  -8  -2  -1  131.59   89.09
  -8   2  -2   45.70   20.00
  -8   2  -2   45.20   30.50
   8   2   2   48.50   66.59
   8   2   2   50.89   33.80
  -8   2  -2   87.89   21.50
  -8  -2  -2   72.39   12.90
   8  -2   2   68.19   13.60
   8  -2   2  103.89   45.60
   8  -2   2   80.99    8.60
  -8  -2  -2   71.29    9.60
   8   2   3  213.68   33.80
  -8   2  -3  235.18   27.70
  -8   2  -3  185.98   29.90
   8   2   3  242.08   46.10
  -8  -2  -3  229.28   17.40
   8  -2   3  222.28   15.30
  -8  -2  -3  211.38   17.60
   8  -2   3  197.78   18.70
  -8  -2  -3  236.38   20.90
   8  -2   3  215.38   51.49
  -8   2  -4   11.90   15.80
  -8   2  -4    6.30   14.70
   8   2   4   -0.90   31.00
   8   2   4   24.20   21.90
  -8   2  -4   34.30   28.80
  -8  -2  -4   47.10   14.00
   8  -2   4   49.80   59.89
   8  -2   4   38.00    9.40
   8  -2   4   18.10   22.20
   8  -2   4   36.70    7.10
  -8  -2  -4   30.60    8.50
   8   2   5   82.29   24.00
  -8   2  -5   63.69   17.20
  -8   2  -5  101.59   21.70
   8   2   5   75.99   31.90
  -8   2  -5   29.30   27.60
  -8  -2  -5   71.09   12.30
   8  -2   5   11.70   79.99
  -8  -2  -5   81.69   17.60
   8  -2   5   43.60    9.90
   8  -2   5   74.99   28.80
   8   2   6  115.99   28.70
   8   2   6  180.18   32.50
  -8   2  -6  147.09   23.20
  -8   2  -6  100.39   30.70
   8  -2   6  127.99  106.79
   8  -2   6  179.88   12.10
   8  -2   6  152.88   14.80
   8   2   7   57.69   30.50
  -8   2  -7  105.79   19.90
   8   2   7   66.59   24.10
   8  -2   7   82.19   22.90
   8  -2   7   98.49   11.40
   8  -2   7   77.79    9.40
   8   2   8    0.10   17.60
   8   2   8    6.90   16.40
  -8   2  -8   22.20    9.50
   8  -2   8   17.40   18.40
   8  -2   8   48.40    9.70
   8   2   9  127.99   31.70
   8   2   9  141.39   27.10
   8  -2   9  132.79   27.60
   8  -2   9  183.68   13.90
   8   2  10   15.30   18.30
   8   2  10    2.90    9.90
   8  -2  10   12.40   26.40
   8  -2  10    1.10   10.80
  -8   3  13   26.60   10.30
   8   3 -13   26.40   13.80
   8  -3 -13   29.60   18.80
  -8   3  12   29.80   13.30
   8   3 -12   39.30   17.20
  -8  -3  12   53.79    9.70
  -8  -3  12   24.40   13.20
   8  -3 -12   -6.20   16.80
   8   3 -11   72.89   21.30
  -8   3  11   40.80   26.40
  -8  -3  11  107.59   23.40
   8  -3 -11   44.90   21.40
   8  -3 -11   76.59   11.40
  -8  -3  11   67.99   10.20
  -8  -3  11   73.29   13.50
  -8   3  10   13.10   25.60
  -8   3  10   61.89   20.40
  -8   3  10   -4.50   18.50
  -8   3  10   37.30   19.60
   8   3 -10   15.80   19.30
   8  -3 -10   62.49   10.80
   8  -3 -10   58.99    9.00
   8   3  -9   54.59   23.30
  -8   3   9   16.70   20.30
  -8   3   9   76.99   22.60
  -8   3   9   67.99   25.00
  -8   3   9   59.49   28.50
   8  -3  -9   25.00    8.00
  -8  -3   9   40.70    7.20
   8  -3  -9   59.49  168.68
   8  -3  -9   29.60    7.60
  -8  -3   9   43.10    8.30
  -8   3   8  262.57   32.30
  -8   3   8  185.88   44.50
  -8   3   8  229.48   36.90
   8   3  -8  171.68   33.90
  -8   3   8  245.98   34.20
   8  -3  -8  206.58   16.80
   8  -3  -8  228.68   19.20
   8  -3  -8  111.39  107.49
  -8  -3   8  165.28  142.89
  -8  -3   8  227.78   16.90
  -8  -3   8  240.48   16.70
  -8   3   7  110.09   47.10
  -8   3   7   98.29   17.40
   8   3  -7  109.29   28.30
  -8   3   7  120.69   24.40
   8  -3  -7  119.79   14.80
   8  -3  -7  104.79   85.39
  -8  -3   7  127.99   12.30
  -8  -3   7   85.09   99.59
  -8  -3   7  146.19  112.09
  -8  -3   7  114.19   14.50
   8  -3  -7  136.49   13.90
  -8   3   6  118.39   30.00
  -8   3   6  128.79   24.20
  -8   3   6  138.19   27.80
   8   3  -6   87.49   28.40
  -8   3   6  105.59   25.50
  -8   3   6  122.09   15.70
   8  -3  -6  135.99   70.89
  -8  -3   6  137.69   12.60
  -8  -3   6  162.18   41.10
   8  -3  -6  119.29   15.80
  -8  -3   6   70.39   86.79
  -8  -3   6  133.79   85.79
  -8  -3   6  130.79   11.30
   8  -3  -6  118.29   12.00
  -8   3   5  551.24   43.50
  -8   3   5  491.35   34.30
  -8   3   5  537.25   48.00
   8   3  -5  453.25   49.20
  -8   3   5  556.84   47.30
  -8   3   5  472.65   52.89
   8  -3  -5  505.85   31.40
   8  -3  -5  494.45   34.20
  -8  -3   5  457.95   41.40
   8  -3  -5  517.65   85.49
  -8  -3   5  479.65   96.09
  -8  -3   5  484.85   30.80
  -8  -3   5  508.05   31.80
  -8  -3   5  285.37   92.49
  -8   3   4  189.68   38.60
   8   3  -4  205.58   36.50
  -8   3   4  226.28   35.20
  -8   3   4  219.18   33.20
  -8   3   4  227.18   28.60
  -8   3   4  246.88   20.10
  -8  -3   4   69.69   62.49
  -8  -3   4  191.78   30.70
  -8  -3   4  227.28   19.80
   8  -3  -4  221.28   16.20
  -8  -3   4  245.18  136.09
   8  -3  -4  194.68   54.79
  -8  -3   4  220.48   16.80
   8  -3  -4  219.98   22.40
  -8   3   3  156.78   22.80
  -8   3   3  122.69   32.10
   8   3  -3  136.89   35.50
  -8   3   3  122.59   19.80
  -8   3   3   86.69   23.10
  -8   3   3  128.89   31.30
  -8  -3   3  145.99   30.10
  -8  -3   3  143.69   80.89
   8  -3  -3  153.18   25.70
  -8  -3   3  137.19   15.30
   8  -3  -3   98.49   43.90
   8  -3  -3  154.18   12.40
  -8  -3   3  134.89   60.19
  -8  -3   3  145.59   12.90
  -8   3   2  231.88   43.10
  -8   3   2  217.98   25.90
   8   3  -2  230.78   60.59
  -8   3   2  193.38   31.20
  -8   3   2  167.18   16.40
  -8   3   2  186.08   31.60
  -8  -3   2  168.08   12.40
  -8  -3   2   57.09   79.49
  -8  -3   2   35.70   61.99
   8  -3  -2  163.48   13.70
   8  -3  -2  133.99   21.70
  -8  -3   2  166.88   17.00
   8  -3  -2  109.19   47.40
  -8  -3   2  163.08   14.20
  -8   3   1   49.70   27.60
  -8   3   1   71.39   21.10
  -8   3   1   84.29   20.40
  -8   3   1   83.69   21.60
  -8   3   1   70.59   12.90
   8   3  -1   32.50   30.40
  -8  -3   1   50.09    9.60
  -8  -3   1  -12.60   64.29
  -8  -3   1   63.59   15.00
  -8  -3   1  -17.10   81.89
   8  -3  -1   59.39    9.00
  -8  -3   1   40.00   18.10
   8  -3  -1   48.30   15.30
  -8  -3   1   40.00    7.20
  -8   3   0  120.69   30.90
   8   3   0  158.08   34.60
  -8   3   0  125.99   21.50
  -8   3   0  112.49   28.40
   8   3   0  128.89   49.10
  -8   3   0  108.09   15.60
  -8   3   0  167.68   34.10
  -8  -3   0   91.19   19.10
   8  -3   0  145.99   41.90
   8  -3   0  123.39   26.20
  -8  -3   0  112.49   15.10
   8  -3   0  139.49   11.70
  -8  -3   0  134.69   73.49
  -8  -3   0  130.19   10.20
  -8   3  -1   43.40   27.90
  -8   3  -1    8.00   11.20
  -8   3  -1   27.70   15.90
  -8   3  -1    1.10   16.40
  -8   3  -1    4.00   18.60
   8   3   1   17.60   27.30
   8   3   1    5.30   24.00
   8  -3   1   -2.80   39.30
  -8  -3  -1    5.00    4.60
   8  -3   1   14.80   13.10
  -8  -3  -1   14.70    6.10
  -8  -3  -1   -2.30   10.10
   8  -3   1    7.50    6.00
  -8  -3  -1  -60.69   82.79
  -8  -3  -1   17.70   14.70
   8   3   2   56.49   29.50
   8   3   2   88.09   26.60
  -8   3  -2  110.49   26.20
   8   3   2   97.19   45.60
  -8   3  -2  116.39   28.90
  -8   3  -2  120.99   24.60
  -8  -3  -2   94.09   17.60
  -8  -3  -2  130.59   17.10
   8  -3   2  133.69   45.00
  -8  -3  -2   43.40  102.69
   8  -3   2  113.99   10.60
  -8  -3  -2  107.29   10.70
  -8  -3  -2  121.79   10.30
   8  -3   2  113.29   17.30
  -8   3  -3  260.67   45.80
   8   3   3  246.58   37.90
   8   3   3  218.18   53.69
  -8   3  -3  341.17   34.50
   8   3   3  294.77   45.50
  -8   3  -3  298.17   32.40
  -8  -3  -3  345.37   27.60
  -8  -3  -3  325.37   21.30
  -8  -3  -3  305.37   20.60
   8  -3   3  292.97   24.00
   8  -3   3  313.47   20.40
   8   3   4   40.60   22.70
   8   3   4   41.40   45.00
  -8   3  -4   28.20   15.40
  -8   3  -4   12.60   14.60
  -8   3  -4   63.09   24.70
   8  -3   4   10.50   57.29
   8  -3   4   24.90   26.40
   8  -3   4   30.40    9.60
  -8  -3  -4   -2.00   15.20
  -8  -3  -4   20.80    8.00
  -8  -3  -4   17.70    7.20
   8  -3   4   30.10    5.70
  -8   3  -5   92.89   26.80
   8   3   5   79.59   27.70
  -8   3  -5  107.49   20.00
  -8   3  -5  107.49   23.80
   8   3   5   82.49   25.40
  -8  -3  -5   85.89   11.50
  -8  -3  -5   70.09   13.80
   8  -3   5   92.19    9.00
   8  -3   5   84.29   14.50
   8  -3   5  -30.70   72.59
  -8   3  -6   40.70   22.30
   8   3   6   47.20   24.80
   8   3   6  -15.50   31.10
  -8   3  -6   41.60   13.40
   8  -3   6   17.20    4.70
   8   3   7   29.20   18.50
  -8   3  -7   36.00   19.80
  -8   3  -7   39.30   12.20
   8   3   7   44.20   20.80
   8  -3   7   49.70   10.10
   8  -3   7   58.79    7.50
   8  -3   7   33.90   19.80
   8   3   8    1.50   15.20
  -8   3  -8   31.90   17.10
   8  -3   8   20.40    6.00
   8  -3   8   20.10   19.20
   8  -3   8   45.80    8.10
   8   3   9    2.20   10.30
   8   3   9   20.20   17.90
   8  -3   9    8.40    6.20
   8   3  10    5.70   15.80
   8   3  10    9.50    9.10
  -8   4  12    6.20    7.30
   8   4 -12    4.80   11.20
  -8  -4  12   11.00    9.10
  -8   4  11   80.59   19.40
  -8   4  11   56.89   17.00
   8   4 -11   40.10   18.10
   8  -4 -11   35.20   12.10
   8  -4 -11   67.09    9.60
  -8   4  10   13.00   13.30
   8   4 -10    0.30   15.90
  -8   4  10    9.10   13.70
  -8  -4  10    4.70    5.00
   8  -4 -10    8.10    6.40
  -8  -4  10   -1.20   14.40
   8  -4 -10    0.70    6.90
  -8   4   9   10.50   16.40
   8   4  -9   11.50   20.80
  -8   4   9    4.80   13.90
  -8   4   9    9.30   14.70
   8  -4  -9   16.00    7.40
   8  -4  -9   14.30    7.00
  -8  -4   9   16.20    5.80
  -8  -4   9   14.70    6.70
  -8  -4   9    6.30   15.50
  -8   4   8   58.39   20.30
  -8   4   8   33.70   16.60
  -8   4   8   40.90   32.50
   8   4  -8   39.50   24.40
  -8   4   8   52.69   19.60
  -8  -4   8   62.49    9.70
   8  -4  -8   62.49    8.80
   8  -4  -8   54.49   11.80
  -8  -4   8   55.39    9.10
  -8  -4   8   67.69   21.50
   8   4  -7  134.49   31.30
  -8   4   7   57.69   30.80
  -8   4   7  128.19   29.40
  -8   4   7  115.19   23.80
  -8  -4   7  124.39   12.00
   8  -4  -7  114.89   15.30
  -8  -4   7  128.19   11.30
   8  -4  -7  114.79   11.80
   8  -4  -7  -59.39   93.59
  -8  -4   7  133.69   35.10
  -8  -4   7  -44.10  108.59
  -8   4   6  240.08   32.60
  -8   4   6  213.48   48.30
   8   4  -6  188.98   37.80
  -8   4   6  209.68   29.60
  -8   4   6  220.08   31.60
   8  -4  -6  120.99   83.99
   8  -4  -6  278.37   18.20
  -8  -4   6  284.47  102.69
   8  -4  -6  254.87   21.30
  -8  -4   6  266.37   17.40
  -8  -4   6  242.68   28.50
  -8  -4   6  260.97   18.40
  -8   4   5   16.20   16.70
   8   4  -5   19.00   24.50
  -8   4   5   13.80   28.30
  -8   4   5    0.60   17.40
  -8   4   5   23.60   17.50
  -8   4   5    9.70   14.70
  -8  -4   5   15.60    6.40
   8  -4  -5   20.00   11.50
   8  -4  -5  -26.00   67.49
   8  -4  -5    9.20    6.70
  -8  -4   5   -7.80   82.29
  -8  -4   5   90.49  111.99
  -8  -4   5   10.60    5.40
  -8  -4   5   18.00   16.90
  -8   4   4  127.29   31.10
  -8   4   4  173.58   26.70
  -8   4   4  159.88   19.90
  -8   4   4  117.89   26.60
   8   4  -4  164.48   35.00
   8  -4  -4  171.98   64.49
  -8  -4   4  -60.59  112.29
   8  -4  -4  121.09   21.30
   8  -4  -4  169.48   13.80
  -8  -4   4  165.98   14.10
  -8  -4   4  147.79   76.19
  -8   4   3  131.09   19.20
  -8   4   3  135.99   23.20
  -8   4   3  114.29   35.70
   8   4  -3  115.89   30.40
  -8  -4   3  141.19   32.80
  -8  -4   3   32.00   67.49
   8  -4  -3  175.28   55.69
  -8  -4   3  136.29   13.10
  -8  -4   3   80.99  110.49
   8   4  -2   38.20   25.00
  -8   4   2   30.10   19.90
  -8   4   2   45.40   30.40
  -8   4   2   22.80   23.40
  -8   4   2   62.89   19.30
  -8   4   2   66.39   17.00
  -8  -4   2   80.89   78.49
  -8  -4   2    1.20  102.89
  -8  -4   2   29.00   22.50
   8  -4  -2   -9.10   45.10
  -8  -4   2   51.69    9.80
  -8  -4   2   30.00   14.90
  -8   4   1  270.37   30.00
  -8   4   1  291.07   33.60
   8   4  -1  227.58   35.00
  -8   4   1  166.28   46.70
  -8   4   1  206.98   24.60
  -8  -4   1  198.48   22.60
  -8  -4   1  347.37  119.49
   8  -4  -1  235.68   51.89
  -8  -4   1  216.58   30.60
  -8  -4   1  198.98   85.99
  -8  -4   1  219.18   17.10
   8   4   0   65.39   25.50
  -8   4   0  131.89   23.40
   8   4   0   42.50   29.30
  -8  -4   0  112.29    9.40
   8  -4   0   36.90   46.30
  -8  -4   0   91.99   19.20
  -8  -4   0  119.79   28.00
  -8  -4   0   49.00   78.19
  -8   4  -1  270.27   31.50
   8   4   1  233.08   41.40
  -8   4  -1  319.07   33.60
  -8   4  -1  214.38   40.00
  -8   4  -1  326.27   30.90
   8   4   1  259.27   38.90
  -8  -4  -1  218.38   25.70
   8  -4   1  210.98   53.19
  -8  -4  -1   16.50   92.39
   8  -4   1  273.67   19.00
  -8  -4  -1  262.17   36.30
  -8  -4  -1  253.87   17.80
  -8  -4  -1  294.67   19.10
  -8   4  -2   59.09   19.90
  -8   4  -2   17.30   15.40
   8   4   2   13.60   24.10
  -8   4  -2   17.80   22.80
   8   4   2   14.90   23.90
  -8  -4  -2   36.70    6.30
   8  -4   2   40.90   13.60
  -8  -4  -2   12.00   13.10
  -8  -4  -2 -117.19  114.19
  -8  -4  -2   37.50   21.10
  -8  -4  -2   21.60    5.70
   8  -4   2    7.80   49.60
   8   4   3   -4.50   23.30
  -8   4  -3   26.50   14.30
  -8   4  -3   26.00   17.70
   8   4   3   20.70   23.20
  -8   4  -3   29.30   20.50
   8   4   3   54.79   31.80
   8  -4   3   21.50    6.10
  -8  -4  -3   72.59  147.59
  -8  -4  -3    6.70    6.10
  -8  -4  -3   16.70    6.20
   8  -4   3   23.00   11.00
   8  -4   3   58.19   56.39
  -8   4  -4  248.68   25.20
  -8   4  -4  171.38   34.30
  -8  -4  -4  201.68   16.10
  -8  -4  -4  164.98   19.10
   8  -4   4   51.49   64.79
   8  -4   4  234.08   15.10
   8   4   5   29.60   27.10
  -8   4  -5   57.19   16.90
  -8   4  -5   72.69   18.50
  -8   4  -5   35.30   19.90
   8   4   5   30.60   23.50
   8   4   5   17.30   20.80
   8  -4   5   43.60    7.40
   8  -4   5   69.49   14.30
  -8  -4  -5   41.00    8.80
  -8  -4  -5   44.70    9.30
  -8   4  -6    8.70   17.80
   8   4   6    6.40   34.20
   8   4   6    2.30   17.40
  -8   4  -6   11.00   10.20
   8  -4   6    7.90    7.80
   8  -4   6    2.30    4.40
  -8  -4  -6    5.20    5.60
   8   4   7   38.10   18.30
  -8   4  -7   41.00   10.80
  -8   4  -7   35.60   15.10
   8  -4   7   55.29    7.20
   8  -4   7   55.79    9.30
   8   4   8   -8.40   10.60
   8   4   8    4.30   12.90
  -8   4  -8   -2.50   11.40
   8  -4   8    2.00    5.60
   8  -4   8    0.80    5.40
  -8   5  10   15.90    9.00
  -8   5  10    5.10    8.20
  -8   5  10   18.10   11.90
   8   5 -10   23.70   14.50
   8  -5 -10   37.70    8.00
  -8   5   9    3.20   10.10
  -8   5   9   -6.10   11.70
  -8   5   9   -6.20    9.70
   8   5  -9    1.80   15.10
   8  -5  -9    6.80    5.90
   8  -5  -9    6.30    5.80
  -8  -5   9    4.10    4.60
  -8  -5   9   -4.10    7.20
  -8  -5   9    2.00   15.80
  -8   5   8   44.40   15.10
   8   5  -8    6.50   17.00
  -8   5   8   41.50   14.90
  -8   5   8   26.90   13.00
   8  -5  -8   75.59   10.80
  -8  -5   8   68.69    8.30
   8  -5  -8   50.39    9.30
  -8  -5   8   80.49   16.80
   8   5  -7   16.30   20.90
  -8   5   7    4.50   13.20
  -8   5   7   16.00   12.60
  -8   5   7    1.10   12.40
   8  -5  -7   31.10    7.20
   8  -5  -7   23.60    8.20
  -8  -5   7   19.20    5.70
  -8   5   6   -1.00   13.30
   8   5  -6  -15.20   17.80
  -8   5   6   21.10   15.10
  -8   5   6   11.70   13.60
  -8  -5   6   13.00   12.50
   8  -5  -6   24.60   10.10
   8  -5  -6   19.40    6.80
  -8  -5   6   16.90    6.00
   8   5  -5   89.99   26.70
  -8   5   5  105.29   23.00
  -8   5   5  128.99   23.90
  -8  -5   5  134.79   12.30
   8  -5  -5  102.79   18.70
  -8  -5   5  116.69   23.60
   8  -5  -5  157.38   12.60
  -8   5   4   17.80   15.20
  -8   5   4    2.10   14.40
   8   5  -4   16.70   25.60
  -8   5   4   -3.60   14.30
  -8   5   4   26.50   25.60
  -8  -5   4   14.20   14.70
  -8  -5   4    5.60    6.40
   8  -5  -4    8.80    7.20
  -8   5   3   47.70   15.60
  -8   5   3   56.59   23.10
  -8   5   3   61.99   17.60
  -8   5   3   -2.50   23.30
  -8  -5   3   34.30   16.50
   8  -5  -3    6.40   89.59
  -8  -5   3   46.30    7.00
   8  -5  -3   56.99    8.60
   8   5  -2   53.19   28.30
  -8   5   2   60.39   17.30
  -8   5   2   82.09   19.10
   8  -5  -2   89.39   11.20
  -8  -5   2   48.40   17.20
   8  -5  -2   91.69   67.79
  -8  -5   2  -79.89  116.29
  -8  -5   2   65.79    8.00
  -8   5   1  -18.50   26.30
  -8   5   1   29.30   23.50
  -8   5   1   12.80   14.40
  -8   5   1    9.60   15.10
   8  -5  -1   -3.70    7.10
  -8  -5   1  175.38  127.09
  -8  -5   1   -1.20   15.60
   8  -5  -1   -0.40   61.49
  -8  -5   1   -2.90    4.40
  -8   5   0   14.40   18.10
   8   5   0    8.10   22.70
  -8   5   0   38.00   16.00
  -8   5   0   17.90   20.40
  -8  -5   0   18.30    4.90
   8  -5   0   18.80    7.70
  -8  -5   0   33.30   13.20
  -8   5  -1   28.30   17.00
  -8   5  -1  -10.70   14.10
  -8   5  -1   15.30   18.00
   8   5   1  -12.20   24.10
   8   5   1    7.40   20.00
   8  -5   1    6.60    6.90
  -8  -5  -1    1.00    4.50
  -8  -5  -1   11.10   13.60
  -8  -5  -1    5.40    5.40
   8   5   2    4.50   20.50
  -8   5  -2   24.60   16.90
   8   5   2  -10.90   20.50
  -8   5  -2   24.30   21.40
  -8   5  -2   10.50   13.40
  -8  -5  -2   19.40    5.30
   8  -5   2   21.30    6.50
  -8  -5  -2   17.60    5.80
   8   5   3   33.70   21.60
  -8   5  -3   45.20   13.20
  -8   5  -3   40.80   18.50
   8  -5   3   35.90   12.60
  -8  -5  -3   50.69    8.30
  -8  -5  -3   51.69    8.70
   8  -5   3   59.29    8.60
  -8   5  -4   40.50   16.30
  -8   5  -4   16.80   22.10
   8   5   4   12.60   19.20
  -8  -5  -4   22.40    5.60
   8  -5   4   14.30   11.00
  -8  -5  -4   23.40    7.50
  -8   5  -5   16.80    9.20
   8   5   5    1.70   18.90
  -8   5  -5    5.60   13.20
   8   5   5    0.90   15.10
   8   5   5   -9.20   20.70
  -8  -5  -5   11.10    7.40
   8  -5   5   30.20    9.20
   8   5   6   10.20   22.90
  -8   5  -6   14.20    8.80
   8   5   6    0.90   15.30
   8   5   6   -4.20   18.70
  -8   5  -6   13.00   12.30
   8  -5   6    8.80   11.30
  -8  -5  -6    6.60    4.90
   8  -5   6   18.00    5.00
  -8   5  -7    3.10    6.20
   8   5   7   -3.60   11.00
   8   5   7    4.90   14.10
  -8   5  -7    7.00    8.20
   8   6  -8   -0.20   13.30
  -8  -6   8   18.10    8.70
   8  -6  -8   28.80    6.50
  -8   6   7    5.10    9.00
  -8   6   7    3.20    8.10
  -8   6   7   -9.70   10.40
   8   6  -7   -0.20   14.40
  -8  -6   7    9.70    4.30
   8  -6  -7   -2.60    6.80
  -8  -6   7   -2.20    7.00
   8   6  -6   -1.10   13.90
  -8   6   6   21.30   15.00
  -8   6   6   32.00   11.50
  -8   6   6   11.20    9.40
  -8  -6   6   22.70    8.50
  -8  -6   6   10.30    5.00
   8  -6  -6   28.10    8.70
  -8  -6   6   41.70    8.10
   8  -6  -6   18.90    6.60
  -8   6   5   -5.40   10.20
  -8   6   5   -1.40    9.60
   8   6  -5    5.60   15.10
  -8   6   5   12.10   12.40
  -8  -6   5    9.20    5.40
   8  -6  -5    0.40    9.90
  -8  -6   5    3.10    4.60
  -8  -6   5   -9.10    8.70
   8  -6  -5   13.00    7.10
  -8   6   4   33.00   11.90
  -8   6   4   16.70   12.10
   8   6  -4    2.20   15.50
  -8   6   4   28.50   13.90
  -8  -6   4   27.40    5.40
   8  -6  -4   10.80    7.10
  -8  -6   4   24.70    5.40
  -8  -6   4   18.50   10.80
  -8   6   3  -13.90   23.50
  -8   6   3   -0.30   12.70
   8   6  -3   -5.10   16.10
  -8   6   3    5.60   12.40
  -8   6   3   14.40   10.00
   8  -6  -3    9.30    6.50
  -8  -6   3    2.70   11.50
  -8  -6   3    5.50    4.90
  -8  -6   3   13.10    6.20
  -8   6   2   12.10   13.80
  -8   6   2    3.00   10.00
  -8   6   2   24.90   12.90
   8   6  -2    1.90   16.10
  -8   6   2   31.70   22.60
  -8  -6   2    5.80    4.50
   8  -6  -2    6.90    7.60
  -8  -6   2    4.40   10.80
  -8   6   1   53.39   20.20
  -8   6   1   92.49   22.00
  -8   6   1   66.99   18.40
  -8   6   1   74.39   18.00
  -8  -6   1   59.09    8.80
  -8  -6   1   64.39    7.70
  -8  -6   1   57.59   11.90
   8  -6  -1   62.79   11.20
   8   6   0   13.30   17.20
  -8   6   0   25.70   13.10
  -8   6   0   -7.60    9.30
  -8   6   0   27.90   17.80
   8  -6   0   -3.20    7.30
  -8  -6   0    8.80   11.70
  -8  -6   0   12.80    5.10
  -8  -6   0   11.60    4.70
  -8   6  -1   49.80   11.60
  -8   6  -1   16.00   14.20
   8   6   1   13.30   15.40
  -8   6  -1   46.60   14.20
  -8  -6  -1   42.10    7.90
  -8  -6  -1   51.49    7.40
   8  -6   1   28.40    7.30
   8   6   2   13.40   16.30
  -8   6  -2    2.40   13.50
  -8   6  -2    7.90    8.70
  -8   6  -2   12.70   12.50
   8  -6   2   12.00    6.40
  -8  -6  -2    0.80    5.20
  -8  -6  -2    5.40    4.80
   8   6   3   -2.30   26.20
  -8   6  -3   12.30    8.70
   8   6   3    5.80   16.60
  -8   6  -3   18.40   12.10
   8  -6   3   15.60   12.70
  -8  -6  -3   21.40    6.40
  -8  -6  -3   40.00    8.40
  -8   6  -4   24.40    8.50
  -8   6  -4    7.80   10.10
   8   6   4   15.60   16.20
   8   6   4    3.10   20.90
   8  -6   4   -2.80    8.20
  -8  -6  -4   13.00    4.60
  -9   0  14   -6.30    9.80
   9   0 -14    3.30   14.50
   9   0 -13   19.70   15.60
  -9   0  13   10.20   11.30
  -9   0  12  -11.00   13.50
   9   0 -12   25.10   19.80
  -9   0  11  147.39   31.60
   9   0 -11  125.89   29.70
  -9   0  10   40.60   22.50
   9   0 -10   23.80   23.80
   9   0  -9   90.39   29.60
  -9   0   9  113.69   29.00
   9   0  -8   43.50   28.00
  -9   0   8   88.99   29.10
  -9   0   7   -9.50   25.90
  -9   0   7   15.20   10.20
   9   0  -7    9.90   29.80
  -9   0   6  136.29   14.10
   9   0  -6  134.69   16.40
  -9   0   6  213.18   42.80
   9   0  -5   42.80   10.50
  -9   0   5   72.69   28.10
  -9   0   5   55.69    9.60
   9   0  -4  163.58   15.90
  -9   0   4  143.59   13.70
   9   0  -3   36.90    8.40
  -9   0   3   23.60    7.40
   9   0  -3   18.90    8.30
  -9   0   2   16.10    7.40
   9   0  -2   -4.10    7.70
   9   0  -2   -2.30    6.90
   9   0  -1  258.97   32.10
   9   0  -1  209.68   18.20
   9   0  -1  168.98   15.80
  -9   0   1  216.18   16.90
   9   0   0   23.30   21.40
   9   0   0   10.00    9.30
  -9   0   0    5.40    7.60
   9   0   0   18.30    7.10
   9   0   1    7.70   18.80
  -9   0  -1   16.50    8.50
   9   0   1   11.60    9.30
  -9   0  -1   15.70   20.60
   9   0   1   21.80    7.50
  -9   0  -2  469.25   39.40
  -9   0  -2  420.36   31.30
   9   0   2  458.05   41.90
   9   0   3   15.40   21.30
  -9   0  -3   -6.20   12.20
   9   0   3   14.10    8.90
   9   0   4  277.37   22.30
   9   0   4  298.07   37.00
  -9   0  -4  273.87   36.00
  -9   0  -4  301.47   25.70
   9   0   5   44.80   21.80
   9   0   5   78.39   32.10
   9   0   6   36.90   23.00
   9   0   6   20.10   21.80
   9   0   7   93.49   24.10
   9   0   7   12.50   22.10
   9   0   8   14.70   19.10
   9   0   8   -6.40   16.00
   9   0   8    3.60   20.20
   9   0   9   -8.80   14.50
   9   0   9    4.30   13.10
   9   0  10   14.70   11.30
   9   0  10   15.20   11.20
   9   1 -14   13.00   12.50
   9  -1 -14   15.00   15.50
  -9  -1  14    0.90    8.80
   9   1 -13   24.30   15.90
  -9   1  13   17.50   14.20
   9  -1 -13   24.60   16.90
  -9  -1  13    4.70   11.00
   9   1 -12    6.90   16.30
   9  -1 -12   12.20   18.30
  -9  -1  12   17.10   14.30
  -9   1  11    4.60   18.10
   9   1 -11    6.00   19.50
  -9  -1  11   23.90   18.60
   9  -1 -11   53.99   23.60
  -9   1  10   68.99   22.20
   9   1 -10   94.59   27.50
  -9  -1  10   90.59   22.60
   9  -1 -10   42.90   26.40
  -9   1   9  139.09   38.70
   9   1  -9  121.89   33.70
  -9  -1   9  172.18   35.90
   9  -1  -9   89.99   14.70
  -9  -1   9  125.69  133.59
   9  -1  -9  132.49   36.40
  -9  -1   9  131.29   18.00
  -9   1   8   74.29   28.00
   9   1  -8   16.20   25.00
  -9   1   8    3.50   12.20
  -9  -1   8   21.80   12.10
  -9  -1   8  -65.19  115.19
   9  -1  -8   17.80   31.90
  -9  -1   8   21.80   25.60
   9  -1  -8   28.30    9.50
  -9   1   7  395.26   28.90
  -9   1   7  443.06   40.20
   9   1  -7  405.86   46.60
  -9   1   7  445.56   46.90
   9  -1  -7  372.26   26.20
  -9  -1   7  388.26   31.70
  -9  -1   7  233.28  105.39
  -9  -1   7  337.97   28.60
   9  -1  -7  397.16   27.50
  -9   1   6   18.60    9.80
  -9   1   6   -4.50   18.70
   9   1  -6    1.60   31.60
  -9   1   6   28.60   25.50
  -9  -1   6   21.40   10.60
  -9  -1   6  -19.00   93.69
   9  -1  -6    8.80    9.00
   9  -1  -6    4.50    7.00
  -9  -1   6   15.50   12.10
  -9  -1   6   26.00   28.60
  -9   1   5   89.99   25.00
   9   1  -5  129.49   35.20
  -9   1   5   74.89   10.90
  -9   1   5  145.09   29.50
   9  -1  -5   76.69   13.80
   9  -1  -5   77.99   10.40
   9  -1  -5   66.69   81.19
  -9  -1   5   91.69   14.70
  -9  -1   5   66.69   10.80
  -9  -1   5   95.49   32.00
   9   1  -4   25.90   29.10
  -9   1   4   89.79   20.00
  -9   1   4   50.29   29.20
  -9   1   4   84.49   10.70
   9  -1  -4   49.60    8.90
   9  -1  -4   30.10    9.10
  -9  -1   4   66.59   10.00
   9  -1  -4  178.48   75.09
  -9  -1   4   55.79   13.60
  -9   1   3   10.10    7.30
   9   1  -3   -3.80   23.60
  -9   1   3    7.00   15.30
  -9  -1   3   -9.20    6.70
  -9  -1   3   -1.80    7.30
   9  -1  -3   -4.10    8.40
   9  -1  -3    1.60    5.70
   9  -1  -3   31.80   63.19
  -9   1   2  176.08   23.10
  -9   1   2  186.78   15.50
   9   1  -2  186.18   31.80
   9  -1  -2  196.78   16.70
  -9  -1   2  159.88   15.20
   9  -1  -2  165.38   57.39
  -9  -1   2  164.28   15.00
   9  -1  -2  165.28   13.60
   9   1  -1  101.19   28.30
  -9   1   1   65.09   10.90
   9  -1  -1   51.49    9.80
   9  -1  -1   59.49   50.59
  -9  -1   1   53.59    9.70
   9  -1  -1   44.60    7.30
  -9   1   0   33.50   22.10
   9   1   0  100.39   26.50
  -9   1   0   55.29   10.80
   9  -1   0   58.39    8.40
   9  -1   0   58.49    9.30
   9  -1   0   25.20   52.89
  -9  -1   0   60.89   11.20
  -9  -1   0   49.90   10.40
  -9   1  -1  137.99   15.30
  -9   1  -1   98.29   52.49
  -9   1  -1  186.88   27.80
   9   1   1  233.18   49.60
  -9  -1  -1  189.48   16.70
   9  -1   1  128.29   16.40
   9  -1   1  168.88   63.79
   9  -1   1  160.68   12.60
   9   1   2   87.09   25.30
  -9   1  -2  101.29   37.30
  -9   1  -2   84.79   23.00
  -9   1  -2   66.39   13.80
  -9   1  -2  115.99   23.40
   9  -1   2   81.39    9.40
   9  -1   2  124.19   28.00
   9  -1   2   75.99   67.59
   9  -1   2   78.29   13.40
  -9   1  -3  235.98   27.60
   9   1   3  218.88   41.30
   9   1   3  211.38   33.20
  -9   1  -3  199.88   32.50
  -9   1  -3  216.88   21.90
   9  -1   3  140.59   17.00
   9  -1   3  182.98   83.09
   9  -1   3  181.88   28.70
  -9  -1  -3  176.38   19.80
   9  -1   3  167.48   14.10
   9   1   4  114.79   26.80
   9   1   4   14.80   25.20
  -9  -1  -4   77.09   16.20
   9  -1   4   94.59   26.20
   9  -1   4   70.59    9.70
   9  -1   4   57.49   12.40
   9   1   5   34.00   22.70
  -9   1  -5   42.70   16.20
   9   1   5    1.00   23.40
  -9  -1  -5   16.10   18.70
   9  -1   5   24.10    6.80
   9  -1   5   24.00    7.90
   9  -1   5   13.70   20.30
  -9   1  -6  235.88   25.90
   9   1   6  220.48   51.09
   9   1   6  208.68   37.60
   9   1   6  227.98   34.30
   9  -1   6  136.89   32.00
   9  -1   6  203.78   34.70
   9  -1   6  193.18   16.30
   9   1   7   27.00   19.40
   9   1   7   44.20   28.30
   9   1   7   23.10   19.40
   9  -1   7   35.80   18.90
   9  -1   7   19.80   24.70
   9  -1   7   33.70    9.10
   9   1   8   33.10   16.10
   9   1   8   10.40   25.30
   9   1   8   37.90   20.90
   9  -1   8   29.30   19.40
   9   1   9   -3.00   12.70
   9   1   9    5.60   15.30
   9   1   9   -0.80   18.40
   9  -1   9   -5.30   13.70
   9  -1   9   -3.40   13.50
   9   1  10    8.40   13.10
   9   1  10   -3.00    8.60
   9  -1  10   14.20   12.30
   9  -1  10   21.00    9.90
   9  -2 -13    3.30   17.30
  -9   2  12   -3.10   17.60
  -9   2  12   -5.30   18.40
   9   2 -12    4.20   16.50
   9  -2 -12  -11.90   19.80
  -9  -2  12    6.60   14.40
  -9   2  11   30.30   20.60
  -9   2  11   36.00   22.10
   9   2 -11   74.99   22.50
   9  -2 -11   27.80   23.20
  -9  -2  11   30.90   15.30
  -9   2  10   98.79   27.00
  -9   2  10   79.19   24.60
   9   2 -10   35.50   21.70
  -9  -2  10   85.79   15.30
   9  -2 -10   34.70   24.00
   9  -2 -10   92.99   13.50
  -9  -2  10   66.29   20.00
  -9   2   9   71.39   25.00
   9   2  -9   50.79   23.90
  -9   2   9   96.49   27.20
  -9   2   9   68.89   24.40
  -9  -2   9  103.09   12.40
   9  -2  -9  112.59   13.50
  -9  -2   9  125.79   18.30
   9  -2  -9  100.79   12.80
  -9  -2   9  182.48   34.10
  -9   2   8   64.99   26.20
  -9   2   8   38.60   26.40
  -9   2   8   45.50   21.50
   9   2  -8   63.59   28.50
  -9   2   8   86.49   17.00
  -9  -2   8   45.40  117.19
  -9  -2   8   92.99   27.40
  -9  -2   8   61.49   11.10
   9  -2  -8   57.79   10.90
   9  -2  -8   69.69   12.80
  -9  -2   8   51.69   12.00
   9   2  -7   88.89   28.30
  -9   2   7   93.99   28.80
  -9   2   7   63.19   14.40
  -9   2   7   93.09   27.20
  -9   2   7   26.80   25.90
  -9   2   7  134.49   28.10
   9  -2  -7   85.39   13.60
  -9  -2   7  105.89  111.59
  -9  -2   7   78.59   11.00
   9  -2  -7   92.69   13.10
  -9  -2   7   30.40   25.20
  -9  -2   7   78.79   19.40
  -9   2   6  668.93   58.39
  -9   2   6  638.04   59.39
  -9   2   6  751.12   52.99
   9   2  -6  605.64   57.89
  -9   2   6  644.34   57.49
  -9   2   6  647.34   44.10
  -9  -2   6  815.82   62.69
   9  -2  -6  679.23   43.10
   9  -2  -6  682.43  122.59
  -9  -2   6  661.23   41.40
  -9  -2   6  698.03   46.00
  -9  -2   6  655.23  127.39
   9  -2  -6  596.94   41.10
  -9   2   5  208.28   18.60
  -9   2   5  222.48   27.80
  -9   2   5  277.37   38.30
   9   2  -5  245.28   40.40
  -9   2   5  200.48   41.30
  -9   2   5  188.18   39.40
  -9  -2   5  223.28   46.70
  -9  -2   5  209.18   15.80
  -9  -2   5  203.88   24.90
  -9  -2   5  197.58   16.40
   9  -2  -5  211.18   16.00
   9  -2  -5  226.18   74.79
   9  -2  -5  202.78   19.10
  -9   2   4  104.29   28.00
  -9   2   4  134.19   13.30
  -9   2   4  166.58   27.30
  -9   2   4   94.69   24.10
  -9   2   4  116.89   28.20
  -9  -2   4  113.09   13.70
  -9  -2   4  132.29   12.40
  -9  -2   4   23.50   80.49
  -9  -2   4  105.79   11.70
  -9  -2   4  128.49   22.80
   9  -2  -4  142.99   16.30
   9  -2  -4  136.29   64.19
   9  -2  -4  128.99   11.50
  -9   2   3  255.37   42.90
   9   2  -3  305.87   53.89
  -9   2   3  327.97   37.20
   9   2  -3  360.66   47.80
  -9   2   3  334.57   45.10
  -9   2   3  392.86   32.80
  -9   2   3  325.27   30.20
  -9  -2   3  330.37   24.70
  -9  -2   3  362.96   23.10
  -9  -2   3  284.87   96.39
   9  -2  -3  311.37   22.30
   9  -2  -3  357.76   26.20
  -9  -2   3  354.86   22.10
   9  -2  -3  334.17   73.19
  -9  -2   3  330.87   30.40
  -9   2   2    7.90   14.80
   9   2  -2    0.80   28.30
  -9   2   2    2.50   19.60
  -9   2   2   20.60    8.90
  -9   2   2   11.40   24.90
  -9   2   2   11.90   21.40
  -9  -2   2   12.50    5.50
  -9  -2   2    2.40   13.90
   9  -2  -2   42.10   47.80
  -9  -2   2   10.80    9.00
   9  -2  -2   19.50    6.20
   9  -2  -2    6.60   14.00
   9   2  -1  250.07   60.69
  -9   2   1  136.59   32.70
  -9   2   1  159.48   33.10
  -9   2   1  151.88   15.60
  -9   2   1  155.38   29.00
   9  -2  -1  173.58   13.20
  -9  -2   1  164.48   13.70
   9  -2  -1   56.29   47.10
   9  -2  -1  116.79   21.10
  -9  -2   1  153.18   12.80
  -9  -2   1  166.18   16.00
  -9  -2   1  149.99   22.50
  -9   2   0  172.38   34.40
   9   2   0  140.59   34.70
  -9   2   0  165.48   29.30
  -9   2   0  133.59   15.30
  -9   2   0  140.39   29.30
  -9   2   0  182.68   21.90
   9  -2   0  155.58   12.20
   9  -2   0  142.29   52.89
  -9  -2   0  143.09   12.70
  -9  -2   0  122.79   15.30
  -9  -2   0  136.59   12.70
   9  -2   0  135.39   16.30
  -9  -2   0  107.69   24.30
  -9   2  -1   18.70   18.00
  -9   2  -1   -6.40   18.40
   9   2   1   18.60   42.10
  -9   2  -1   11.30   26.60
   9   2   1   27.50   23.90
  -9  -2  -1    0.50    6.70
  -9  -2  -1    5.00    7.50
  -9  -2  -1    9.10   10.10
   9  -2   1    9.90    8.10
   9  -2   1   67.69   53.49
   9  -2   1    8.10    5.70
  -9   2  -2  502.15   37.20
  -9   2  -2  406.26   51.99
   9   2   2  396.56   43.40
   9   2   2  463.45   59.59
  -9   2  -2  382.56   38.70
  -9  -2  -2  413.26   31.30
   9  -2   2  438.86   26.60
   9  -2   2  363.16   77.79
   9  -2   2  427.46   29.00
  -9  -2  -2  378.16   27.70
  -9   2  -3   15.80   14.80
   9   2   3   36.00   23.00
   9   2   3   41.70   34.50
  -9   2  -3   21.70   16.50
  -9   2  -3   12.40   24.80
  -9  -2  -3   11.10   12.90
   9  -2   3   27.20    9.10
  -9  -2  -3   24.60    9.00
   9  -2   3   51.69   23.80
   9  -2   3   22.10    5.90
   9  -2   3  101.19  108.29
   9   2   4  157.58   32.30
  -9   2  -4  216.28   23.80
   9   2   4  181.48   44.50
  -9   2  -4  207.98   27.60
   9  -2   4  169.08   31.90
   9  -2   4  185.68   83.49
   9  -2   4  169.78   13.40
  -9  -2  -4  124.99   21.30
   9  -2   4  160.18   17.00
  -9  -2  -4  178.28   23.20
  -9   2  -5  149.49   22.90
  -9   2  -5  131.19   31.00
   9   2   5  155.98   32.30
   9  -2   5  129.19   33.50
   9  -2   5  142.09   14.40
  -9   2  -6   16.90   11.70
  -9   2  -6    7.70   24.20
   9   2   6   17.90   21.60
   9  -2   6   12.00    5.60
   9  -2   6   -3.70   32.00
   9   2   7   12.30   18.90
  -9   2  -7   14.20   10.60
   9   2   7   15.60   18.80
   9  -2   7    6.10   17.10
   9  -2   7   16.00    6.20
   9   2   8   -3.40   17.90
   9   2   8   -1.80   15.00
   9  -2   8   10.90    6.70
   9  -2   8   27.00   17.90
   9   2   9    1.20   10.90
   9   2   9    5.70   15.50
   9  -2   9   -0.80   13.90
  -9   3  12   16.70   10.00
   9   3 -12    3.20   15.00
   9   3 -11   19.50   17.70
  -9   3  11    7.00   12.90
  -9   3  11    2.20   27.30
  -9  -3  11   15.10    6.80
   9  -3 -11   16.70    7.60
  -9  -3  11    9.90   13.40
  -9   3  10   11.50   33.10
  -9   3  10   49.80   17.50
  -9   3  10   24.00   18.30
   9   3 -10   29.00   19.00
  -9  -3  10   62.19    9.90
   9  -3 -10   51.99    9.80
  -9  -3  10   76.29   13.80
   9  -3 -10   50.49   10.90
  -9  -3  10   36.70   17.90
  -9   3   9   51.39   19.70
   9   3  -9   32.80   21.70
  -9   3   9   60.59   19.50
  -9   3   9   32.00   22.80
  -9  -3   9   89.99   16.40
   9  -3  -9   82.49   12.10
  -9  -3   9   86.89   10.60
   9  -3  -9   74.19   10.90
  -9  -3   9  132.49   30.20
   9   3  -8    7.60   23.20
  -9   3   8   66.29   21.10
  -9   3   8   39.90   19.70
  -9   3   8   25.90   19.50
  -9   3   8   45.60   25.60
  -9  -3   8   48.10    9.90
   9  -3  -8   54.79   10.20
   9  -3  -8   53.79   11.80
  -9  -3   8   52.99   22.70
  -9  -3   8   60.29   12.60
   9  -3  -8  125.49  142.99
  -9   3   7  117.89   30.50
  -9   3   7  132.89   32.40
  -9   3   7  178.68   27.40
  -9   3   7  136.89   25.80
   9  -3  -7  212.88  111.69
  -9  -3   7  174.58   14.70
   9  -3  -7  168.68   14.20
  -9  -3   7  230.68   39.40
  -9  -3   7  181.18   22.30
   9  -3  -7  176.18   16.60
  -9   3   6    2.50   19.20
  -9   3   6   -8.90   12.50
   9   3  -6    8.80   25.80
  -9   3   6    8.40   16.90
  -9   3   6    3.20   19.40
  -9   3   6   21.70   21.70
  -9  -3   6   12.90   34.80
   9  -3  -6    9.70    9.00
  -9  -3   6   10.00   12.20
   9  -3  -6    5.50    6.40
  -9  -3   6   22.10    7.20
   9  -3  -6    0.40   83.19
  -9  -3   6   84.59  114.19
  -9   3   5   21.00   22.60
  -9   3   5   23.50   19.50
  -9   3   5   49.20   17.70
   9   3  -5   16.50   25.50
  -9   3   5   38.10   12.90
  -9   3   5   23.60   20.20
  -9  -3   5   48.70    9.70
  -9  -3   5   23.70   14.20
  -9  -3   5   45.90  106.09
   9  -3  -5  105.29   79.29
   9  -3  -5   30.60    9.70
  -9   3   4  169.88   31.90
  -9   3   4  149.88   25.00
  -9   3   4  135.09   39.10
  -9   3   4  204.28   31.00
   9   3  -4  132.09   36.40
  -9   3   4  132.89   18.00
  -9  -3   4  195.78   14.80
  -9  -3   4  171.78   13.50
  -9  -3   4  184.48   20.50
  -9  -3   4  136.09   93.49
   9  -3  -4  180.18   19.30
  -9  -3   4  413.26  119.69
  -9  -3   4  198.98   24.70
   9  -3  -4  204.18   14.80
  -9   3   3   59.89   21.40
  -9   3   3   44.90   18.20
  -9   3   3   44.40   12.50
  -9   3   3   78.09   21.60
  -9   3   3   19.40   22.60
   9   3  -3   44.80   27.90
   9  -3  -3   54.89   12.80
  -9  -3   3  130.49  112.89
  -9  -3   3   83.99   80.29
  -9  -3   3   57.89    9.60
  -9  -3   3   49.99    8.10
   9  -3  -3   51.19    8.90
   9  -3  -3   25.90   54.79
  -9  -3   3   72.59   15.00
  -9  -3   3   50.09   14.20
  -9   3   2  208.28   25.00
  -9   3   2  199.68   29.40
  -9   3   2  158.48   18.30
  -9   3   2  171.28   30.40
  -9   3   2  162.98   36.50
  -9  -3   2   13.70  108.19
  -9  -3   2  159.68   18.80
  -9  -3   2  177.08   13.00
   9  -3  -2  107.79   52.39
   9  -3  -2  188.08   20.50
  -9  -3   2  165.98   23.80
   9  -3  -2  171.08   13.90
  -9  -3   2  142.59   14.30
  -9  -3   2   83.69   94.19
   9   3  -1   80.29   31.50
  -9   3   1   74.09   20.00
   9   3  -1   61.79   31.80
  -9   3   1   90.99   22.90
  -9   3   1  105.29   28.10
  -9   3   1   66.89   19.90
  -9   3   1   87.19   16.80
   9  -3  -1   94.59   10.60
   9  -3  -1   17.30   48.80
  -9  -3   1  110.59   22.50
  -9  -3   1  157.98  125.49
  -9  -3   1  132.09   98.59
   9  -3  -1   82.69   17.50
  -9  -3   1  106.79    9.20
  -9  -3   1  101.99   16.60
  -9   3   0   72.99   27.90
  -9   3   0   96.39   17.40
   9   3   0   50.49   30.10
   9   3   0   71.39   28.70
  -9   3   0  100.09   26.00
  -9   3   0  100.79   21.60
  -9   3   0  114.79   20.80
   9  -3   0   -9.90   68.19
   9  -3   0   87.59   16.50
  -9  -3   0   79.89    9.70
  -9  -3   0    3.90  105.49
  -9  -3   0   95.19   21.10
  -9  -3   0  109.49   11.00
   9  -3   0  107.29   10.50
  -9  -3   0  107.89   16.20
   9   3   1  192.38   38.60
   9   3   1  241.28   67.69
  -9   3  -1  252.67   28.80
  -9   3  -1  195.78   42.30
  -9   3  -1  267.17   31.40
   9  -3   1  313.67   64.29
   9  -3   1  222.38   21.40
  -9  -3  -1  243.48   22.70
  -9  -3  -1  245.88   17.10
  -9  -3  -1  222.78   17.00
  -9  -3  -1  236.58   26.10
  -9   3  -2   31.90   18.00
   9   3   2   34.00   25.50
  -9   3  -2   43.90   22.60
  -9   3  -2   21.90   26.60
   9  -3   2   87.49   60.39
  -9  -3  -2   11.70   14.90
   9  -3   2   24.60    6.20
  -9  -3  -2   17.90    7.60
  -9  -3  -2   22.80    6.80
   9  -3   2   20.50    9.90
  -9   3  -3  170.18   23.50
   9   3   3   84.49   35.40
  -9   3  -3  148.59   30.30
  -9   3  -3  122.59   23.50
   9   3   3  124.79   31.10
  -9  -3  -3  111.79   14.70
  -9  -3  -3  123.69   13.00
   9  -3   3  126.59   68.99
   9  -3   3  140.99   33.80
   9  -3   3  138.49   11.10
   9  -3   3   95.99   15.40
  -9   3  -4   49.20   21.80
   9   3   4   98.99   30.30
  -9   3  -4  121.19   19.40
  -9   3  -4   87.49   22.00
   9   3   4   87.39   25.10
   9  -3   4   51.89   83.09
   9  -3   4   77.39   13.50
   9  -3   4   68.19   24.10
   9  -3   4   77.29    9.10
  -9  -3  -4   86.59   11.60
  -9   3  -5   -2.30   20.90
   9   3   5  -11.50   18.70
   9   3   5    9.30   21.90
  -9   3  -5    1.70   11.00
   9  -3   5    8.70    9.70
  -9  -3  -5   -1.70    7.10
   9  -3   5    5.70    4.90
  -9   3  -6   73.69   15.90
   9   3   6   73.79   23.20
   9   3   6   45.50   20.10
  -9   3  -6   50.99   20.90
   9  -3   6   67.09   10.40
   9  -3   6   50.99    7.50
  -9   3  -7   -3.30   17.30
   9   3   7   -1.90   14.30
   9  -3   7    8.10    5.90
   9  -3   7   16.60   17.10
   9  -3   7    0.10    5.20
   9   3   8   24.60   13.10
  -9   3  -8   27.30   15.50
   9  -3   8   30.60   17.40
   9  -3   8   45.50    9.10
   9   3   9  -10.80    8.70
   9   3   9   -7.70   11.10
  -9   4  11   13.80   19.20
   9   4 -11   86.09   20.60
  -9  -4  11   35.30   12.60
   9  -4 -11   59.09    9.80
   9   4 -10   31.50   16.20
  -9   4  10   -5.70   15.70
  -9   4  10   -6.20   12.00
  -9   4  10    9.50   11.00
   9  -4 -10    5.50    6.00
  -9  -4  10    7.40    6.60
  -9  -4  10    3.50   13.80
  -9  -4  10    1.20    5.10
   9  -4 -10    6.60    7.30
  -9   4   9    0.40   14.50
   9   4  -9   11.00   18.70
  -9   4   9   -3.70   14.30
  -9   4   9  -20.70   29.60
  -9   4   9    0.30   13.60
  -9  -4   9    5.40    5.50
  -9  -4   9   13.10    8.30
  -9  -4   9    7.80   15.80
   9  -4  -9   -6.10    9.00
   9  -4  -9    7.10    6.40
  -9   4   8   47.80   37.00
  -9   4   8   34.60   15.20
   9   4  -8    5.80   20.10
  -9   4   8    9.10   14.90
  -9   4   8   49.40   16.30
  -9  -4   8   74.99   15.60
   9  -4  -8   33.80    7.10
  -9  -4   8   55.39    9.10
  -9  -4   8   23.80   28.50
  -9   4   7   35.40   17.10
  -9   4   7    2.20   23.50
   9   4  -7   41.80   24.90
  -9   4   7    1.40   15.80
   9  -4  -7   29.50    6.70
  -9  -4   7   41.10   25.30
  -9  -4   7   40.70    7.50
  -9  -4   7   30.70   11.40
   9  -4  -7   36.60    9.30
  -9   4   6  168.48   27.60
  -9   4   6  154.08   25.50
  -9   4   6  111.39   30.00
   9  -4  -6  136.39   12.90
  -9  -4   6  130.19   20.90
   9  -4  -6   84.19  103.69
  -9   4   5  145.19   28.60
  -9   4   5  138.79   31.30
  -9   4   5  133.09   23.90
  -9   4   5  149.49   27.80
  -9  -4   5  146.59   22.20
   9  -4  -5  114.29   12.40
   9  -4  -5  -35.00   82.79
   9  -4  -5  128.99   17.20
  -9  -4   5  135.09   12.90
  -9  -4   5  144.09  114.69
  -9  -4   5  142.29   11.70
  -9   4   4   21.70   26.50
   9   4  -4   31.00   25.80
  -9   4   4    3.10   16.20
  -9   4   4   22.40   16.80
  -9   4   4   31.50   17.20
  -9  -4   4   40.30    7.80
  -9  -4   4   58.99   14.40
  -9  -4   4  -22.00  104.29
   9  -4  -4   38.00   11.40
  -9  -4   4   47.20    7.70
   9  -4  -4   96.59   76.39
   9  -4  -4   43.80    7.90
  -9   4   3   55.29   18.20
   9   4  -3    5.70   23.30
  -9   4   3   36.10   16.40
  -9   4   3   41.30   17.20
  -9   4   3   18.20   23.10
  -9  -4   3   33.70    6.40
  -9  -4   3   11.00   97.69
   9  -4  -3    0.10   69.19
   9  -4  -3   39.40    7.80
   9  -4  -3   25.80   12.40
  -9  -4   3   34.90    6.90
  -9  -4   3   35.10   13.10
   9   4  -2    1.70   24.60
  -9   4   2    0.20   16.40
  -9   4   2   -0.30   24.60
  -9   4   2   24.50   17.00
  -9   4   2    4.70   16.30
  -9  -4   2   -5.30    6.00
  -9  -4   2   -1.60   12.40
  -9  -4   2   54.89   99.29
   9  -4  -2   13.40   13.40
   9  -4  -2  -39.60   60.29
   9  -4  -2   13.50    6.50
  -9  -4   2    5.70    5.40
   9   4  -1   24.80   24.50
  -9   4   1   31.80   16.60
  -9   4   1   17.20   16.70
  -9   4   1   13.60   15.30
  -9   4   1   14.70   22.80
  -9  -4   1   16.10   12.50
   9  -4  -1   24.90    7.20
   9  -4  -1   19.40   12.80
  -9  -4   1   22.30    5.30
  -9  -4   1  -25.90  109.89
   9  -4  -1   21.10   54.19
   9   4   0   -8.10   25.80
   9   4   0   22.20   25.80
  -9   4   0   25.30   17.00
  -9   4   0   -3.40   20.90
  -9   4   0   20.30   15.80
  -9   4   0   48.90   19.10
  -9  -4   0  -94.99  128.89
   9  -4   0   11.30    6.80
  -9  -4   0   11.20    5.60
   9  -4   0   61.29   58.69
  -9  -4   0    7.30   12.30
   9  -4   0   -3.00   11.80
  -9  -4   0   11.60    5.40
  -9   4  -1   93.59   21.70
  -9   4  -1   62.09   16.20
   9   4   1   24.70   25.10
  -9   4  -1   56.79   23.10
   9   4   1   18.20   24.40
  -9  -4  -1   51.39   13.50
  -9  -4  -1   43.30    8.30
   9  -4   1   71.09    9.30
  -9  -4  -1   11.70  140.19
  -9  -4  -1   52.49    8.50
   9  -4   1   37.90   11.80
   9  -4   1   57.09   63.09
  -9   4  -2    5.30   20.10
  -9   4  -2    3.70   13.20
  -9   4  -2   37.30   15.90
  -9  -4  -2   10.30    6.60
   9  -4   2   -6.40   66.59
   9  -4   2    9.80    5.80
  -9  -4  -2   11.20    6.80
  -9   4  -3   13.40   11.90
   9   4   3  -16.30   25.80
  -9   4  -3    4.80   13.60
  -9   4  -3   -2.30   17.10
   9   4   3  -11.10   20.60
   9  -4   3    9.20    5.60
  -9  -4  -3    9.60    7.60
  -9  -4  -3   14.60    6.20
   9  -4   3    2.50    9.70
   9  -4   3   28.60   27.90
   9   4   4  147.29   31.90
  -9   4  -4  192.28   21.80
  -9   4  -4  201.28   32.30
  -9   4  -4  174.98   22.60
  -9  -4  -4  149.69   14.00
   9  -4   4  156.18   17.50
  -9  -4  -4  117.49   18.10
   9  -4   4  193.98   13.30
   9   4   5   62.99   21.10
   9   4   5   -5.40   16.10
  -9   4  -5   58.89   25.80
  -9  -4  -5   25.80    6.40
   9  -4   5   38.10    8.90
   9  -4   5   35.20    8.00
   9   4   6   -5.20   14.70
  -9   4  -6    9.20   13.40
  -9   4  -6   56.49   13.00
   9   4   6   11.60   15.50
   9  -4   6   51.39    9.50
   9  -4   6   25.90    5.40
   9  -4   6   23.10   18.30
  -9   4  -7    4.60   12.10
   9   4   7   26.40   14.20
   9   4   7   25.80   14.90
  -9   4  -7   28.60    8.00
   9  -4   7   17.30    8.00
   9  -4   7   10.30    7.70
  -9   5   9   94.89   16.00
  -9   5   9  117.49   16.60
   9  -5  -9   88.79   11.10
  -9  -5   9   80.29   11.50
  -9  -5   9   67.69    8.70
   9   5  -8    5.70   14.20
  -9   5   8    6.60   10.40
  -9   5   8   12.90   11.80
  -9   5   8    2.50   10.50
   9  -5  -8    4.80    6.30
  -9  -5   8   16.50    6.90
  -9  -5   8    5.00    6.90
   9  -5  -8    1.00    5.90
  -9  -5   8    2.30    4.60
  -9   5   7   52.79   14.90
  -9   5   7   30.60   11.40
  -9   5   7   34.60   14.30
   9   5  -7   18.70   18.00
  -9  -5   7   29.40    8.60
  -9  -5   7   28.80    6.50
   9  -5  -7   38.50    7.40
  -9  -5   7   37.00    7.60
   9  -5  -7   25.60    7.70
  -9   5   6   14.60   23.00
  -9   5   6    3.30   13.20
   9   5  -6    2.30   17.30
  -9   5   6    4.20   21.60
   9  -5  -6    7.40    8.30
  -9  -5   6    9.80    6.30
  -9  -5   6    8.00    5.20
  -9  -5   6   13.30   10.30
  -9   5   5   48.90   14.90
   9   5  -5   10.20   20.00
  -9   5   5   49.50   15.90
  -9   5   5   19.40   30.50
  -9   5   5   10.00   12.70
  -9  -5   5   40.20    7.50
  -9  -5   5   32.20    6.30
  -9  -5   5   28.80   16.40
   9  -5  -5   54.09   10.80
   9  -5  -5   19.70    7.00
  -9   5   4    9.30   13.50
  -9   5   4    0.10   20.90
  -9   5   4   13.30   13.20
  -9   5   4   12.10   14.20
   9   5  -4    1.10   19.00
   9  -5  -4    2.80   10.80
  -9  -5   4    4.50    6.10
  -9  -5   4   -4.20    4.90
   9  -5  -4    6.60    6.50
  -9  -5   4    4.80   10.80
  -9   5   3    5.40   21.80
  -9   5   3    8.90   12.90
  -9   5   3    4.20   13.00
   9   5  -3    0.20   19.30
  -9   5   3    1.60   14.50
   9  -5  -3   12.00    6.50
  -9  -5   3   13.70    5.40
  -9  -5   3   -8.10   10.00
  -9  -5   3   10.10    5.90
   9  -5  -3   15.90   12.40
  -9   5   2  156.38   33.10
  -9   5   2  173.48   23.40
   9   5  -2  138.19   30.10
  -9   5   2  223.38   26.10
  -9  -5   2  185.58   22.30
   9  -5  -2  160.68   14.30
   9  -5  -2  186.18   21.10
  -9   5   1   51.99   16.30
  -9   5   1   39.40   14.80
   9   5  -1   -8.60   19.60
  -9   5   1   11.70   17.80
  -9   5   1   29.00   13.80
   9  -5  -1    4.60   11.90
  -9  -5   1   17.50   10.40
  -9  -5   1   36.40    6.60
  -9  -5   1   46.10    7.10
   9  -5  -1   25.50    7.40
  -9   5   0   94.59   21.40
  -9   5   0   31.00   18.50
  -9   5   0   57.19   15.00
  -9  -5   0   80.59    8.50
   9  -5   0   75.59   10.10
   9  -5   0   35.70   13.20
  -9  -5   0   79.19   18.80
  -9  -5   0   67.29    8.50
   9   5   1   53.59   25.30
  -9   5  -1   36.30   13.90
  -9  -5  -1   74.69    8.70
   9  -5   1   63.09    8.90
  -9  -5  -1   65.89    8.60
   9  -5   1   31.50   11.80
  -9   5  -2   46.60   13.80
  -9   5  -2   24.80   20.50
   9   5   2   29.90   23.30
  -9   5  -2   53.59   27.40
   9   5   2   17.20   21.30
  -9  -5  -2   28.50   10.20
   9  -5   2   12.50   10.50
  -9  -5  -2   38.50    6.30
   9   5   3   25.60   21.80
  -9   5  -3   70.09   16.40
  -9   5  -3   48.90   18.30
  -9  -5  -3   65.19    8.40
  -9  -5  -3   41.50    8.30
   9  -5   3   70.49   14.50
   9  -5   3   58.89    8.20
   9   5   4   -0.60   16.70
  -9   5  -4   21.40   14.50
  -9   5  -4   35.40   10.30
   9   5   4    7.10   38.00
   9  -5   4   -4.10    8.30
  -9  -5  -4   10.60    5.20
   9  -5   4    8.20    4.70
  -9   5  -5   -0.50    6.40
   9   5   5  -15.70   13.60
  -9   5  -5   13.80   11.70
   9  -5   5    2.20    6.40
  -9  -5  -5    7.80    5.10
   9  -5   5   11.20    4.40
   9   5   6   -5.80   11.70
  -9   5  -6    2.00    9.50
  -9   5  -6   10.20    5.70
   9  -5   6    5.50    4.90
  -9   6   6   -2.30    7.10
  -9   6   6    6.90    7.10
  -9   6   6   -4.00    8.80
   9   6  -6   10.70   11.70
  -9  -6   6   23.90    6.90
   9  -6  -6   10.50    7.50
  -9   6   5    5.60   11.80
  -9   6   5    5.20    9.20
   9   6  -5   11.60   15.70
  -9   6   5    2.30    7.20
   9  -6  -5    4.10    8.70
  -9  -6   5   10.00    7.20
   9   6  -4    2.00   14.40
  -9   6   4   -0.20   10.30
  -9   6   4   -4.30    7.60
  -9   6   4   -0.40   12.50
  -9  -6   4    1.10    4.90
   9  -6  -4   -1.00    9.30
  -9  -6   4    1.20    7.80
   9  -6  -4    9.40    6.40
  -9   6   3   79.39   18.90
  -9   6   3   77.99   15.30
   9   6  -3   31.40   18.40
  -9   6   3   74.49   16.90
   9  -6  -3   71.89   10.00
  -9  -6   3   59.89   13.30
  -9  -6   3   50.19    8.10
  -9  -6   3   69.39    7.90
  -9   6   2    4.10   11.40
   9   6  -2   -9.40   15.60
  -9   6   2   -1.40   13.60
  -9   6   2    5.90    9.20
  -9   6   2    2.40   16.40
  -9  -6   2   -2.90    3.80
   9  -6  -2    3.50   10.80
  -9  -6   2    4.00    8.20
   9  -6  -2   -4.00    6.40
  -9  -6   2   -1.10    4.80
  -9   6   1   32.60    9.60
  -9   6   1   13.50   14.50
  -9   6   1   25.50   10.70
   9   6  -1   28.30   17.80
  -9  -6   1   25.80    8.60
  -9  -6   1   25.70    5.60
   9  -6  -1    5.10    6.70
  -9  -6   1   14.60    4.30
  -9   6   0   51.09   14.50
  -9   6   0   53.29   13.10
  -9   6   0   88.19   16.70
   9   6   0   28.30   23.90
  -9  -6   0   63.99    8.60
   9  -6   0   37.10    7.90
   9   6   1   -1.90   16.60
  -9   6  -1    9.00    7.00
  -9   6  -1   -7.90   11.00
  -9   6  -1    5.10    9.90
   9  -6   1    4.30    9.80
  -9  -6  -1   15.80    5.70
   9   6   2   -6.10   15.30
  -9   6  -2   10.60   10.10
  -9   6  -2   12.80    7.30
  -9  -6  -2   21.60    4.60
   9  -6   2   12.30   10.10
 -10   0  13    1.70   10.50
  10   0 -13   16.50   16.40
  10   0 -12    2.00   18.60
 -10   0  12   28.80   14.90
 -10   0  11   22.80   18.30
  10   0 -11   17.40   20.80
 -10   0  10   76.09   22.90
  10   0 -10   30.10   24.70
 -10   0   9  -11.00   20.00
  10   0  -9   18.00   27.40
 -10   0   7   14.00   24.90
 -10   0   7    3.10   12.00
 -10   0   6   21.20   10.90
 -10   0   6   53.49   26.40
 -10   0   5   67.59   12.70
  10   0  -5   76.39   15.20
 -10   0   5  126.89   28.50
 -10   0   4   46.80   27.20
  10   0  -4   43.30    9.80
 -10   0   4   56.79   11.50
  10   0  -3  102.79   14.00
 -10   0   3   86.99   12.60
 -10   0   3  137.29   34.00
  10   0  -2  179.18   18.10
 -10   0   2  150.88   37.50
  10   0  -2  236.08   35.20
 -10   0   2  197.28   37.60
 -10   0   2  143.09   15.60
 -10   0   1   11.80   10.00
  10   0  -1   18.00    9.70
 -10   0   1   -5.00   23.70
 -10   0   1  -14.10   31.70
  10   0  -1   16.30   22.40
 -10   0   0  267.87   35.50
 -10   0   0  299.67   24.60
  10   0   0  364.16   37.30
  10   0   0  313.37   24.40
  10   0   1   12.50   17.90
 -10   0  -1    2.60   11.00
 -10   0  -1  -23.70   17.60
  10   0   1   -2.80   10.10
  10   0   2   -3.60   20.10
  10   0   2  -11.90    9.30
 -10   0  -2   -0.80   12.50
  10   0   3   -1.10   20.60
  10   0   3    1.40   15.30
 -10   0  -3    3.70   15.70
 -10   0  -4  -13.70   18.60
  10   0   4    3.30   18.90
  10   0   5  174.68   33.10
  10   0   5  140.79   30.70
  10   0   6    1.20   19.50
  10   0   6   18.20   18.70
  10   0   7   -4.60   18.50
  10   0   7    7.60   15.20
  10   0   8    4.70   13.60
  10   0   8   18.80   16.90
  10   0   9   -0.70    9.90
  10   0   9   -2.50   11.60
  10   1 -13    2.40   14.20
 -10   1  13    1.20   11.60
  10  -1 -13   10.10   18.80
 -10  -1  13   -0.80    9.20
 -10   1  12   34.90   14.80
  10   1 -12   13.10   15.60
  10  -1 -12   24.10   20.60
 -10  -1  12   74.09   20.10
 -10   1  11  102.69   21.70
 -10  -1  11   85.89   20.50
  10  -1 -11   55.49   25.40
 -10   1  10   -2.10   18.80
  10   1 -10  -15.80   21.00
  10  -1 -10   -9.00   25.00
 -10  -1  10    7.30   18.40
  10   1  -9   52.29   27.70
 -10   1   9   85.09   23.10
 -10  -1   9  136.89   27.80
 -10   1   8   63.49   23.20
  10   1  -8   46.70   29.00
 -10   1   8   30.80   19.10
  10  -1  -8   41.30    9.50
 -10   1   7   28.50   13.50
 -10   1   7   51.99   37.80
 -10   1   7    4.80   20.20
  10   1  -7   42.40   29.80
 -10  -1   7    1.20   32.10
 -10   1   6  183.48   28.70
  10   1  -6  166.08   41.00
 -10   1   6  182.58   39.80
 -10   1   6  149.19   16.30
  10  -1  -6  146.39   15.80
 -10  -1   6  162.68   19.20
 -10  -1   6  160.98   22.10
 -10  -1   6  178.68   39.10
  10  -1  -6  139.79   15.70
 -10   1   5   59.39   19.10
 -10   1   5   73.69   12.80
 -10   1   5   75.29   27.20
 -10  -1   5   69.49   13.70
 -10  -1   5  136.69   32.20
  10  -1  -5   69.19   11.20
  10  -1  -5   45.80   10.30
 -10  -1   5   58.19   12.50
 -10   1   4  465.85   37.10
 -10   1   4  425.86   48.20
 -10   1   4  377.86   27.90
 -10   1   4  429.16   47.20
  10   1  -4  355.56   44.50
 -10  -1   4  416.56   55.29
 -10  -1   4  380.06   28.10
 -10  -1   4  348.57   30.80
  10  -1  -4  360.56   27.10
  10  -1  -4  390.16   25.70
 -10   1   3   77.99   13.20
 -10   1   3  137.39   38.10
 -10   1   3  102.49   26.50
  10   1  -3   54.49   24.80
  10  -1  -3   70.49   96.09
 -10  -1   3   86.29   15.50
 -10  -1   3   91.09   37.90
  10  -1  -3   72.49   10.50
  10  -1  -3   68.89   13.10
 -10  -1   3   67.49   12.10
 -10   1   2   75.29   27.80
  10   1  -2   47.30   24.50
 -10   1   2   43.60   11.10
 -10   1   2   86.89   25.00
  10  -1  -2   48.40    9.50
  10  -1  -2  225.78   88.19
  10  -1  -2   46.70    8.20
 -10  -1   2   49.30   11.10
 -10   1   1  221.98   47.20
  10   1  -1  242.78   36.70
 -10   1   1  212.08   35.40
 -10   1   1  241.58   20.10
 -10  -1   1  211.48   19.70
  10  -1  -1  244.08   19.00
  10  -1  -1  230.08   17.10
  10  -1  -1  168.28   83.49
 -10   1   0    6.60   10.10
 -10   1   0  -22.60   40.10
 -10   1   0   35.00   20.00
  10   1   0   41.40   24.10
 -10   1   0   44.20   30.30
  10  -1   0   17.50    6.40
  10  -1   0  -26.40   81.99
 -10  -1   0   11.60   10.40
  10  -1   0   -0.40    7.40
 -10   1  -1  227.48   28.90
  10   1   1  237.78   36.10
 -10   1  -1  174.18   47.40
 -10   1  -1  181.38   20.00
 -10   1  -1  222.88   35.20
 -10  -1  -1  239.28   21.40
  10  -1   1  226.38   16.20
  10  -1   1  274.77   34.50
  10  -1   1  180.48   19.20
  10   1   2   42.70   30.10
  10   1   2   80.19   24.20
 -10   1  -2   26.90   32.20
 -10   1  -2   31.20   15.10
 -10   1  -2   38.50   20.20
  10  -1   2   42.70   21.60
  10  -1   2   42.10    7.50
  10  -1   2   27.40    9.60
 -10  -1  -2    6.00   12.60
  10   1   3  238.28   60.79
  10   1   3  119.09   30.30
 -10   1  -3  187.08   28.10
  10  -1   3  156.88   16.30
  10  -1   3  151.08   13.80
  10  -1   3  144.49   30.20
 -10  -1  -3  174.68   22.70
 -10   1  -4   54.29   16.90
  10   1   4   71.09   27.30
  10   1   4   13.30   20.00
  10  -1   4   43.80   22.70
  10  -1   4   51.79   13.90
  10   1   5   12.70   23.10
  10   1   5   -4.50   18.50
 -10   1  -5   -7.70   13.60
  10  -1   5   15.90   33.20
 -10   1  -6  110.59   18.50
  10   1   6   60.09   20.90
  10  -1   6   83.49   24.50
  10  -1   6  111.19   26.40
  10  -1   6  124.39   16.90
  10   1   7   32.70   16.80
  10   1   7   51.39   18.80
  10  -1   7   76.69   19.50
  10  -1   7   23.50   21.70
  10   1   8    2.50   15.70
  10   1   8  -10.50   12.80
  10  -1   8   -0.80   13.10
  10  -1   8    4.30   14.50
  10   1   9   11.10   19.90
  10   1   9    1.40    9.30
  10  -1   9   10.70   11.30
  10  -1   9   28.00   12.50
  10   2 -13   -6.00   11.50
 -10  -2  13   41.30   10.80
 -10   2  12   -1.70   13.60
  10   2 -12    6.80   14.90
 -10  -2  12   36.60   13.80
  10   2 -11    9.30   17.50
 -10   2  11   -0.70   16.30
 -10  -2  11   46.10   22.30
 -10   2  10   31.40   19.30
  10   2 -10   29.60   20.70
  10  -2 -10   70.39   11.20
 -10  -2  10   92.99   21.70
 -10   2   9  -15.10   20.70
 -10   2   9    9.50   19.50
  10   2  -9    9.90   21.20
 -10   2   9   21.30   20.30
  10  -2  -9    3.00    7.80
 -10  -2   9    4.10   18.30
 -10  -2   9   23.40    9.00
  10   2  -8  142.09   35.60
 -10   2   8  165.58   36.70
 -10   2   8  136.99   33.90
 -10   2   8  152.68   28.00
  10  -2  -8  128.09   14.80
  10  -2  -8  141.69   15.60
 -10  -2   8  142.09   34.40
 -10  -2   8  158.98   18.90
 -10   2   7  111.79   26.20
 -10   2   7   55.19   25.10
 -10   2   7   74.89   25.20
  10   2  -7   94.19   31.80
 -10   2   7   54.99   19.70
 -10  -2   7   92.79   17.90
  10  -2  -7   82.29   11.50
 -10  -2   7  102.09   28.20
  10  -2  -7   71.49   12.70
 -10   2   6   63.39   28.20
 -10   2   6   22.70   17.40
  10   2  -6   24.50   28.10
 -10   2   6   49.90   14.00
 -10   2   6   86.39   37.20
  10  -2  -6  198.38  124.29
 -10  -2   6   56.79   13.20
  10  -2  -6   49.40    9.70
  10  -2  -6   67.19   13.20
 -10   2   5  114.59   24.90
 -10   2   5  132.19   37.00
 -10   2   5  118.49   17.40
 -10   2   5  134.29   24.70
 -10   2   5  113.99   28.00
 -10  -2   5  105.19   19.10
 -10  -2   5  172.78   34.20
  10  -2  -5  121.99   15.70
 -10   2   4  346.27   31.40
 -10   2   4  309.47   25.60
 -10   2   4  315.07   41.00
 -10   2   4  278.97   42.10
 -10   2   4  360.66   39.20
  10   2  -4  280.77   47.90
  10  -2  -4  344.57   22.40
 -10  -2   4  259.27   25.10
 -10  -2   4  370.56   28.70
  10  -2  -4  340.07   96.69
  10  -2  -4  345.37   24.70
 -10   2   3  193.98   20.50
 -10   2   3  257.57   35.10
 -10   2   3  185.78   38.20
  10   2  -3  158.58   43.30
 -10   2   3  266.47   28.30
 -10   2   3  223.88   36.90
  10  -2  -3  235.58   82.89
 -10  -2   3  254.27   18.30
 -10  -2   3  229.28   21.80
  10  -2  -3  232.08   20.30
  10  -2  -3  254.87   17.80
 -10  -2   3  294.57   25.30
 -10   2   2   28.60   15.30
 -10   2   2   10.70   11.30
  10   2  -2   16.50   26.10
 -10   2   2   51.29   24.00
 -10   2   2   55.39   21.00
 -10   2   2   29.20   24.20
 -10  -2   2   18.50   11.50
  10  -2  -2   37.70   10.20
  10  -2  -2   42.80   69.39
 -10  -2   2   43.80   12.50
  10  -2  -2   40.50    7.60
 -10   2   1    8.70   18.60
 -10   2   1   14.70   11.80
 -10   2   1   -2.40   19.60
 -10   2   1   34.80   27.00
  10   2  -1    3.50   24.70
  10  -2  -1   59.89   64.19
 -10  -2   1    7.20    7.00
 -10  -2   1    4.80   13.10
  10  -2  -1   17.10    9.10
 -10  -2   1    4.30   11.70
  10  -2  -1   10.10    6.30
 -10   2   0  330.97   36.20
  10   2   0  368.26   43.60
 -10   2   0  326.17   27.70
 -10   2   0  357.56   47.90
 -10   2   0  403.96   36.70
  10  -2   0  328.77   25.50
  10  -2   0  424.56   94.39
  10  -2   0  338.97   23.40
 -10  -2   0  353.16   24.10
 -10  -2   0  391.46   28.30
  10   2   1   83.49   42.20
 -10   2  -1   13.20   14.50
  10   2   1   73.69   25.30
 -10   2  -1   28.30   18.90
 -10   2  -1   37.90   17.80
 -10   2  -1   30.40   27.60
 -10  -2  -1   68.79   12.20
  10  -2   1   45.80    9.30
 -10  -2  -1   25.90   13.60
  10   2   2   93.99   49.10
 -10   2  -2  125.29   23.80
 -10   2  -2  132.19   22.90
 -10   2  -2   37.30   24.50
  10   2   2   84.89   26.20
 -10  -2  -2   63.19   16.90
  10  -2   2   73.79   12.80
  10  -2   2   77.59    9.30
  10  -2   2   24.70   88.19
 -10  -2  -2   30.40   16.70
  10  -2   2   62.99   23.50
 -10   2  -3  199.18   23.80
  10   2   3  155.08   32.10
  10   2   3  159.98   34.00
 -10   2  -3  199.58   25.40
  10  -2   3  148.99  109.89
  10  -2   3  165.68   16.80
  10  -2   3  172.28   13.80
  10  -2   3  151.48   29.50
 -10   2  -4   10.20   21.80
 -10   2  -4   16.70   12.70
  10   2   4   42.30   25.90
  10   2   4   27.40   21.60
  10  -2   4   21.00   23.00
  10  -2   4   27.30    9.10
  10  -2   4   31.10    6.10
 -10   2  -5  122.49   28.00
  10   2   5   67.89   23.60
 -10   2  -5  125.59   18.80
  10  -2   5   86.89   10.40
  10  -2   5  111.39   12.80
  10  -2   5  127.29   31.40
 -10   2  -6   29.70   11.40
  10   2   6   13.00   17.40
  10   2   6    9.30   16.10
  10  -2   6   24.30    6.60
  10  -2   6   34.40   18.10
  10  -2   6  -19.40   37.90
  10   2   7    6.50   16.00
  10   2   7    4.70   14.70
  10  -2   7  -15.20   14.80
  10  -2   7   11.60    6.90
  10   2   8   -7.70   15.00
  10   2   8    6.80   11.10
  10  -2   8    4.20   11.80
 -10   3  12   13.10   11.60
  10   3 -12   19.50   13.70
 -10  -3  12   -0.70    8.90
 -10   3  11   26.00   17.20
 -10   3  11    8.80   11.60
  10   3 -11   15.00   14.70
 -10  -3  11   43.40   14.80
 -10   3  10   20.60   22.00
 -10   3  10   -0.70   21.50
 -10   3  10    5.50   14.00
  10   3 -10   19.20   18.30
 -10  -3  10   18.30    7.30
  10  -3 -10    7.80    6.80
 -10  -3  10   36.90   16.50
  10   3  -9   69.19   23.30
 -10   3   9  103.49   24.20
  10  -3  -9   78.09   12.30
 -10  -3   9   85.09   14.80
  10   3  -8  -15.20   19.90
 -10   3   8   -5.60   16.10
 -10   3   8    7.40   17.90
 -10   3   8    2.90   18.90
 -10   3   8   40.70   18.70
  10  -3  -8   20.10    8.10
 -10  -3   8   16.20    6.50
  10  -3  -8   25.70    7.20
 -10  -3   8   25.40    9.50
 -10  -3   8   11.10   20.20
 -10   3   7  128.49   29.20
 -10   3   7  130.79   33.90
 -10  -3   7  110.09   14.10
 -10  -3   7  162.48   19.70
  10  -3  -7  110.49   19.60
  10  -3  -7  135.09   12.60
 -10  -3   7  182.08   38.50
 -10   3   6   89.49   21.70
  10   3  -6   60.69   27.00
 -10   3   6   70.19   23.50
 -10   3   6  142.99   25.50
 -10   3   6   57.39   18.90
 -10  -3   6  106.29   11.50
 -10  -3   6   81.49   12.90
  10  -3  -6    2.10  114.19
 -10  -3   6   44.90   28.70
 -10  -3   6  107.39   18.90
  10  -3  -6  102.49   10.80
  10  -3  -6  126.99   14.50
 -10   3   5    4.40   17.50
 -10   3   5   12.90   18.20
  10   3  -5   20.90   26.80
 -10   3   5   15.60   23.10
 -10   3   5   18.10   17.80
 -10  -3   5   16.20   10.80
 -10  -3   5   22.90    6.60
 -10  -3   5   16.90    8.20
  10  -3  -5   21.80   10.00
  10  -3  -5    2.40   96.19
  10  -3  -5   40.10    7.00
 -10   3   4  263.47   32.70
 -10   3   4  161.88   33.90
  10   3  -4  185.88   40.00
 -10   3   4  223.28   31.30
 -10   3   4  175.78   23.80
 -10  -3   4  206.68   22.60
  10  -3  -4  196.28   89.89
  10  -3  -4  204.08   20.00
 -10  -3   4  220.28   16.30
 -10  -3   4  210.48   26.40
  10  -3  -4  214.68   16.20
 -10  -3   4  235.58   16.90
 -10   3   3   -3.00   22.80
 -10   3   3   -0.90   14.80
  10   3  -3    5.80   27.20
 -10   3   3   23.20   15.60
 -10   3   3    7.30   17.00
 -10   3   3   -6.80   16.70
  10  -3  -3    6.90   10.80
 -10  -3   3  -20.00   15.30
 -10  -3   3   10.90    6.10
  10  -3  -3  106.29   76.89
 -10  -3   3   16.20   11.90
  10  -3  -3    7.30    6.40
 -10   3   2   -1.80   16.40
  10   3  -2    8.90   29.50
 -10   3   2   15.10   17.20
 -10   3   2   22.90   24.20
 -10   3   2   11.60   15.70
 -10   3   2   23.50   15.50
  10   3  -2  -10.70   27.40
  10  -3  -2   15.40    9.70
 -10  -3   2   10.40   10.90
 -10  -3   2   26.70   15.60
  10  -3  -2   26.30   73.09
 -10  -3   2   35.80    7.20
  10  -3  -2   23.40    6.90
 -10  -3   2   30.10    6.90
 -10   3   1  152.98   27.50
 -10   3   1   98.89   22.00
 -10   3   1  115.29   27.90
  10   3  -1  115.69   31.10
 -10   3   1  134.89   25.20
 -10   3   1  132.39   21.30
  10   3  -1   43.00   50.69
 -10  -3   1  113.69   20.50
 -10  -3   1  112.39   20.20
  10  -3  -1  104.79   11.10
 -10  -3   1  101.79   11.90
 -10  -3   1  115.99   11.60
  10  -3  -1  149.59   67.69
  10  -3  -1  107.89   15.40
 -10   3   0    8.70   16.10
 -10   3   0   19.40   15.60
  10   3   0   29.30   25.90
 -10   3   0   29.90   20.40
 -10   3   0   36.40   23.70
 -10  -3   0   -7.90   16.30
 -10  -3   0   22.90    6.80
 -10  -3   0    9.40    7.70
  10  -3   0   -1.00    8.70
  10  -3   0   28.80    6.60
 -10  -3   0   40.50   12.70
  10  -3   0  -18.70   68.39
  10   3   1  178.58   34.90
 -10   3  -1  200.48   37.20
 -10   3  -1  221.38   26.00
 -10  -3  -1  179.78   17.90
  10  -3   1  363.26   86.79
  10  -3   1  216.78   15.20
  10  -3   1  179.48   18.60
 -10  -3  -1  219.98   16.20
 -10   3  -2   52.69   15.10
 -10   3  -2   90.09   20.90
 -10   3  -2   48.10   22.40
  10   3   2   57.29   23.70
  10  -3   2   80.89    9.10
 -10  -3  -2   91.49   11.20
  10  -3   2   83.39   13.70
  10  -3   2  119.39   85.79
  10  -3   2   70.79   23.30
 -10   3  -3    9.30   19.80
 -10   3  -3   22.00   13.00
  10   3   3   25.50   26.20
 -10   3  -3   13.60   11.70
 -10  -3  -3    7.00    9.60
  10  -3   3    6.50   25.10
  10  -3   3   19.60    5.60
  10   3   4   26.50   19.60
 -10   3  -4   90.19   24.40
 -10   3  -4  100.29   19.40
  10   3   4   37.60   22.20
 -10   3  -4   68.19   16.40
  10  -3   4   72.79   13.20
  10  -3   4   71.79   27.30
  10  -3   4   69.09    8.70
 -10   3  -5   89.79   26.10
  10   3   5   15.40   29.80
  10   3   5   15.50   17.70
 -10   3  -5   31.50   10.80
  10  -3   5   48.20   10.10
  10  -3   5   51.09    8.20
  10   3   6   -0.40   14.30
  10   3   6    5.60   14.80
 -10   3  -6   -3.40   15.40
 -10   3  -6    6.00    8.70
  10  -3   6    0.00    5.30
  10  -3   6   15.20   16.50
  10  -3   6    2.80    6.10
  10   3   7    0.80   14.40
 -10   3  -7    5.30    6.00
  10   3   7    5.10   12.20
  10  -3   7  -13.60   13.50
  10   3   8   -6.80   10.30
  10   3   8    3.00    8.40
  10   4 -11   -3.00   12.10
  10   4 -10   12.40   16.00
 -10   4  10   25.30   13.80
 -10   4  10   59.29   14.40
 -10   4  10    5.40   13.70
 -10  -4  10   33.10   14.00
  10  -4 -10   51.39   10.90
 -10   4   9    2.20   13.80
  10   4  -9   -5.20   15.10
 -10   4   9   11.20   11.80
 -10   4   9  -20.90   11.00
 -10  -4   9   10.90   15.90
  10  -4  -9    6.40    7.10
  10  -4  -9    3.60    6.60
 -10  -4   9    7.50    6.30
 -10   4   8    6.80   13.90
 -10   4   8   23.30   15.40
 -10   4   8   19.20   22.50
  10   4  -8    9.20   18.70
 -10   4   8   11.20   12.80
  10  -4  -8   11.90    7.00
  10  -4  -8   20.20    6.40
 -10  -4   8    1.40   22.10
 -10  -4   8   19.50    5.80
 -10   4   7    5.00   12.90
 -10   4   7    9.50   15.20
 -10   4   7    6.40   28.90
  10   4  -7   13.00   21.40
 -10   4   7   17.10   14.90
 -10  -4   7   17.80    8.80
  10  -4  -7    6.80    5.90
  10  -4  -7   24.20    7.60
 -10  -4   7   19.90    6.10
 -10   4   6    6.30   22.50
 -10   4   6    9.70   15.30
 -10   4   6   15.30   15.00
  10   4  -6   -4.00   20.30
 -10   4   6   16.50   15.10
  10  -4  -6   -0.10    7.60
 -10  -4   6   16.90    9.80
  10  -4  -6    0.90    5.90
 -10  -4   6    8.00    7.00
 -10  -4   6    7.60    5.60
 -10   4   5   87.79   20.50
 -10   4   5   52.19   22.60
 -10   4   5  114.69   24.30
 -10   4   5  120.49   22.90
  10   4  -5  106.19   28.20
  10  -4  -5  100.89   14.70
 -10  -4   5   78.69   11.00
  10  -4  -5   85.79   10.40
 -10  -4   5   95.59   10.80
 -10  -4   5  114.39   17.40
  10   4  -4   -0.20   23.70
 -10   4   4    8.40   20.60
 -10   4   4    4.70   17.60
 -10   4   4  -11.90   14.20
 -10   4   4    4.20   14.30
 -10  -4   4    1.90    7.40
  10  -4  -4  -13.30    9.80
 -10  -4   4  -10.80    9.90
 -10  -4   4    3.10    6.10
  10  -4  -4   11.40    6.20
 -10   4   3   27.30   16.70
 -10   4   3   13.80   19.50
 -10   4   3   11.90   14.70
  10   4  -3   16.90   32.00
 -10  -4   3   31.70    6.40
  10  -4  -3   52.69   12.80
 -10  -4   3   36.60   11.30
  10  -4  -3  137.59  143.69
  10  -4  -3   18.10    6.70
 -10   4   2   29.10   15.30
  10   4  -2    5.40   25.20
 -10   4   2   50.79   23.30
 -10   4   2   37.60   16.20
 -10  -4   2   70.59    9.00
  10  -4  -2    9.10   94.69
 -10  -4   2   73.39   12.40
  10  -4  -2   56.79   12.20
  10  -4  -2   61.79    9.70
  10   4  -1  147.19   35.60
 -10   4   1  131.79   33.60
 -10   4   1  191.38   26.50
 -10   4   1  226.48   26.70
 -10  -4   1  173.18   21.20
 -10  -4   1  187.18   14.20
  10  -4  -1  173.18   18.40
  10  -4  -1  180.98   14.50
 -10   4   0   49.80   22.60
  10   4   0   -4.10   24.20
 -10   4   0   59.19   16.40
 -10   4   0   27.70   14.30
  10   4   0    5.00   25.20
  10  -4   0   24.80   10.40
 -10  -4   0   10.10   10.20
 -10  -4   0   29.40    7.20
  10  -4   0   24.10    6.80
 -10  -4   0   21.80    6.20
  10   4   1   26.40   33.90
 -10   4  -1    9.50   18.90
 -10   4  -1   12.60   14.00
  10   4   1   18.20   22.80
 -10   4  -1   20.80   12.90
 -10  -4  -1   21.50    8.30
  10  -4   1    5.10    5.60
 -10  -4  -1   19.20    6.10
  10  -4   1    4.40    8.80
 -10   4  -2   77.59   18.50
  10   4   2   15.70   21.10
 -10   4  -2   64.19   20.80
 -10   4  -2   46.80   14.00
 -10  -4  -2   50.49    9.70
  10  -4   2   73.79    8.70
  10  -4   2   72.09   13.60
  10  -4   2   80.99   25.10
 -10   4  -3   12.70   11.40
 -10   4  -3   13.60   19.00
 -10   4  -3    2.80   10.80
  10   4   3   15.30   18.80
  10  -4   3   17.10   26.40
  10  -4   3   16.50    5.50
 -10  -4  -3   14.20    6.70
  10  -4   3   17.10    9.00
 -10   4  -4    8.40   16.10
  10   4   4   30.40   18.20
 -10   4  -4   17.70   12.40
  10   4   4    3.10   28.30
  10  -4   4   -0.50    4.70
  10  -4   4    4.00    7.70
  10   4   5   51.99   17.70
 -10   4  -5   66.19   13.80
 -10   4  -5   50.19   15.30
  10  -4   5   87.89    8.40
  10  -4   5   86.39   10.30
 -10   4  -6   30.60    7.90
  10   4   6   20.50   16.10
  10   4   6    5.60   15.20
 -10   4  -6   14.70   11.70
  10  -4   6   14.80    5.70
  10  -4   6   12.40   17.60
  10   5  -8   14.80   14.80
 -10   5   8   20.90   10.90
 -10   5   8    5.60    7.30
 -10   5   8    3.60    9.60
 -10  -5   8    9.50    5.50
  10  -5  -8   -1.40    5.50
  10   5  -7   -2.70   21.70
 -10   5   7    3.80   10.20
 -10   5   7   -1.30    8.70
 -10   5   7    9.80   10.90
 -10  -5   7   22.20    6.90
  10  -5  -7   13.70    6.00
  10  -5  -7   16.50    7.10
  10   5  -6   31.10   18.20
 -10   5   6    8.70   12.20
 -10   5   6   24.40   18.50
 -10   5   6    5.90   10.10
 -10   5   6   37.60   13.30
  10  -5  -6   21.20    6.30
  10  -5  -6   14.40    7.80
 -10  -5   6   19.40    7.20
 -10  -5   6   18.30    7.00
 -10   5   5   -2.10    9.50
  10   5  -5    2.70   16.80
 -10   5   5    4.50   10.60
 -10   5   5    3.60   17.80
 -10   5   5    2.30   12.30
 -10  -5   5   -0.60    7.80
 -10  -5   5    3.00    5.70
  10  -5  -5   -5.10    6.10
  10  -5  -5   -1.20    8.60
 -10   5   4    4.30   12.00
  10   5  -4    5.80   17.80
 -10   5   4   61.69   21.80
 -10   5   4   -4.20   16.10
 -10   5   4   54.39   21.50
 -10  -5   4   30.00    6.30
  10  -5  -4   29.10    6.60
  10  -5  -4   24.30    8.90
 -10  -5   4   45.60   10.10
  10   5  -3    0.60   17.20
 -10   5   3   10.90   19.00
 -10   5   3  -12.60   12.60
  10  -5  -3   -4.90    6.80
  10  -5  -3   11.80    9.10
 -10  -5   3   -6.00    4.90
 -10  -5   3    2.40    9.10
 -10  -5   3   -3.20    5.40
  10   5  -2   32.80   21.60
 -10   5   2   12.40   12.50
 -10   5   2   15.20   13.80
 -10  -5   2    9.50    4.50
 -10  -5   2    9.30    5.50
 -10  -5   2    8.60    9.80
  10  -5  -2    1.80    6.90
  10  -5  -2   13.70    8.90
 -10   5   1   43.20   20.60
 -10   5   1   38.50   19.90
  10  -5  -1   25.60    9.20
 -10  -5   1   22.90    6.60
 -10  -5   1   43.10   10.60
  10  -5  -1   54.49    8.60
 -10  -5   1   35.10    7.10
 -10   5   0    8.80   13.20
 -10   5   0   -7.50   16.10
 -10   5   0    9.70   15.10
  10   5   0    9.60   21.00
 -10  -5   0   13.10    5.40
  10  -5   0    8.20    8.50
 -10  -5   0   25.00    7.30
  10  -5   0   11.80    5.70
 -10   5  -1   46.90   17.40
  10   5   1   58.19   24.10
 -10   5  -1   87.29   15.20
 -10  -5  -1   72.89    8.80
  10  -5   1   67.99   13.50
  10  -5   1   84.69    9.00
  10  -5   1   20.90   34.50
 -10  -5  -1   69.99   11.70
 -10   5  -2   -1.50    8.70
 -10   5  -2    1.90   13.50
 -10   5  -2    4.90    8.50
  10   5   2    7.90   21.80
  10  -5   2    1.80    8.10
 -10  -5  -2   -1.30    4.80
 -10  -5  -2    0.40   15.00
  10  -5   2    3.20    5.20
 -10   5  -3   -0.40    7.10
  10   5   3   -2.20   17.30
 -10   5  -3    2.60   11.70
 -10  -5  -3    0.60    5.70
  10  -5   3    1.90    4.90
  10  -5   3   -5.00   11.30
  10   5   4   14.70   15.90
 -10   5  -4   15.30   11.10
 -10   5  -4    2.70    6.20
  10  -5   4   14.50    6.30
 -10   6   4    9.50    7.20
  10   6  -4    5.80   13.40
 -10   6   4    1.50    7.90
 -10  -6   4    4.00    3.60
 -10  -6   4    6.10    5.50
  10  -6  -4    6.10    6.80
 -10   6   3   27.30    7.90
  10   6  -3   23.30   13.70
 -10   6   3   61.69   13.20
 -10   6   3   -5.00   16.80
 -10  -6   3   27.10    7.00
 -10  -6   3   31.20    5.60
  10   6  -2   -2.60   15.80
 -10   6   2    9.40    8.30
 -10   6   2    2.30   13.60
 -10   6   2    6.40    6.80
 -10  -6   2    7.90    4.30
  10  -6  -2    4.40    7.40
 -10   6   1   27.80    7.70
  10   6  -1   27.40   17.10
 -10   6   1   36.80    9.40
 -10   6   1   36.90   15.50
  10  -6  -1    8.10    7.60
 -10  -6   1   17.70    4.60
 -10   6   0    6.50   11.10
 -10   6   0    9.30    5.80
 -10   6   0   24.70    8.40
  10   6   0    8.30   18.10
  10  -6   0    7.80    9.00
 -11   0  13   82.29   15.70
 -11   0  12   46.00   13.80
  11   0 -12   -1.40   19.90
 -11   0  11   -7.60   24.10
  11   0 -11    1.70   21.70
  11   0 -10   75.19   28.30
 -11   0   9  225.98   34.90
 -11   0   8   -2.80   20.70
 -11   0   7  262.67   37.40
 -11   0   6    9.30   21.90
 -11   0   6   -8.40   12.90
  11   0  -6   -0.20   27.70
 -11   0   5   89.39   15.50
  11   0  -5   86.79   28.60
  11   0  -4  143.79   31.50
 -11   0   4  117.29   27.40
 -11   0   4   87.29   15.40
 -11   0   3   34.70   26.00
 -11   0   3   14.20   11.00
  11   0  -3   44.20   23.70
 -11   0   2  258.47   38.50
  11   0  -2  268.67   36.10
 -11   0   2  307.77   25.40
 -11   0   2  270.67   46.20
  11   0  -2  374.46   32.30
 -11   0   1    2.90   11.70
  11   0  -1    6.60   20.40
  11   0  -1   19.50   15.90
 -11   0   1    5.50   28.20
 -11   0   1   10.90   20.30
  11   0   0  268.77   33.30
 -11   0   0  248.48   36.50
 -11   0   0  249.38   23.20
 -11   0  -1  238.88   24.20
  11   0   1  180.98   33.90
 -11   0  -2   -5.50   27.10
  11   0   2   25.10   20.30
  11   0   3   85.29   25.30
  11   0   4   -8.40   22.90
  11   0   4   13.10   19.50
  11   0   5   24.40   19.30
  11   0   5   59.49   20.30
  11   0   6   48.30   22.20
  11   0   6   14.30   16.20
  11   0   6   32.20   18.70
  11   0   7   -8.80   22.40
  11   0   7    0.20   11.60
  11   0   7    4.40   18.20
  11   0   8   35.40   12.10
  11   0   8   14.50   17.90
  11   1 -13   23.50   19.20
 -11   1  12    2.40   11.40
  11   1 -12   -1.40   16.00
 -11  -1  12    4.80    9.00
 -11   1  11   12.30   12.90
  11   1 -11    2.20   18.90
 -11  -1  11   22.70   13.60
 -11   1  10   -7.40   14.90
  11   1 -10   29.50   23.00
 -11  -1  10   -2.70   14.90
  11   1  -9   53.79   26.30
 -11   1   9   55.29   21.30
 -11  -1   9   55.79   20.70
  11   1  -8   26.80   53.89
 -11   1   8    4.90   19.90
 -11  -1   8   38.50   20.20
 -11   1   7    4.70   21.50
 -11  -1   7   11.20   23.00
  11  -1  -7    1.10    8.10
 -11   1   6   79.89   16.20
 -11   1   6   72.79   23.10
 -11  -1   6   51.19   16.80
  11  -1  -6   85.09   12.90
 -11   1   5   11.30   11.90
 -11   1   5   15.50   21.20
  11  -1  -5  -22.30   10.70
  11  -1  -5    6.20    7.70
 -11  -1   5   20.40   28.10
 -11  -1   5  -10.40   13.30
 -11   1   4  325.77   41.30
  11   1  -4  219.98   41.70
 -11   1   4  219.38   22.30
 -11   1   4  245.98   62.89
 -11  -1   4  288.27   55.29
  11  -1  -4  245.18   19.40
 -11  -1   4  215.88   22.60
 -11   1   3  448.56   48.30
 -11   1   3  474.05   44.30
  11   1  -3  361.36   45.50
 -11   1   3  421.06   31.20
  11  -1  -3  429.36   28.70
 -11  -1   3  407.36   31.40
  11  -1  -3  376.46   28.30
 -11  -1   3  455.95   50.39
 -11   1   2    6.30   23.30
 -11   1   2   21.60   19.50
  11   1  -2   -9.70   23.30
 -11   1   2    9.60   12.30
  11  -1  -2   13.40    7.80
  11  -1  -2   13.90    7.60
 -11  -1   2   13.30   11.80
 -11   1   1   85.69   18.60
 -11   1   1   51.29   27.30
  11   1  -1  159.58   34.50
 -11   1   1  175.78   32.30
  11  -1  -1   92.29   18.20
  11  -1  -1  112.99   14.50
 -11  -1   1  137.09   18.50
  11  -1  -1  170.68   31.20
 -11   1   0  -17.20   30.30
 -11   1   0  -10.30   14.60
  11   1   0   29.60   23.20
  11  -1   0   13.60    8.80
  11  -1   0   18.10   20.30
 -11  -1   0   36.60   13.80
  11  -1   0   25.10   12.50
  11   1   1  -10.10   27.70
 -11   1  -1   14.90   22.10
  11   1   1   18.00   22.80
 -11   1  -1   40.00   15.70
 -11   1  -1   33.00   27.00
 -11   1  -1   19.20   17.70
  11  -1   1   12.40    9.10
  11  -1   1   12.30    8.30
  11  -1   1   10.70   19.40
 -11  -1  -1   15.60   15.70
  11   1   2  149.99   38.10
  11   1   2   86.09   25.80
 -11   1  -2  115.49   23.00
  11  -1   2  112.19   27.00
  11  -1   2  100.89   14.10
  11   1   3   15.80   20.60
 -11   1  -3    5.50   15.70
  11   1   3    6.20   23.40
  11  -1   3    7.20   20.30
  11  -1   3    1.50    8.00
 -11   1  -4   27.20   15.20
  11   1   4    9.10   20.10
  11   1   4   49.40   23.90
  11  -1   4   25.40    8.40
  11  -1   4   23.10   20.10
  11   1   5   15.20   19.00
 -11   1  -5   15.40   11.20
  11   1   5   53.49   20.70
  11  -1   5  -17.80   16.00
  11  -1   5    3.30   17.80
  11   1   6   19.50   16.40
  11  -1   6   -4.10   18.70
  11   1   7    6.10   14.80
  11  -1   7   -5.40   20.40
  11  -1   7   28.80   14.20
  11   1   8   -6.90    7.70
  11   1   8  -15.90   14.20
  11  -1   8   -3.10   12.10
  11  -1   8    0.90    9.50
 -11   2  12   35.30   14.20
  11   2 -12   13.90   15.20
 -11  -2  12   15.40    9.00
 -11   2  11    5.70   12.50
  11   2 -11   -5.90   23.30
 -11  -2  11   -0.70   11.50
 -11   2  10   -3.10   14.30
  11   2 -10    6.80   19.90
 -11  -2  10   18.10   15.40
 -11   2   9   60.79   21.60
[truncated: 31,548 more chars]
